# Supplementary material for: Combining Physio-Biochemical Characterization and Transcriptome Analysis Reveal the Responses to Varying Degrees of Drought Stress in Brassica napus L
Source: MDPI journal article supplement (doi:10.3390/ijms23158555), 2022-08-02
Supplement: s1 [file s1]

SUPPORTING INFORMATION

**Figure S1** Distribution of differentially expressed genes (DEGs) and Kyoto Encyclopedia of Genes and Genomes (KEGG) pathway analysis.

**Figure S2** Validation of RNA-seq data by qRT-PCR.

**Table S1** Quantitative analysis of gene expression under CK-SD and SD conditions.

**Table S2** Up-regulated differentially expressed genes.

**Table S3** Down-regulated differentially expressed genes.

**Table S4** GO categories of up-regulated DEGs.

**Table S5** GO categories of down-regulated DEGs.

**Table S6** KEGG enrichment analysis of up-regulated DEGs

**Table S7** KEGG enrichment analysis of down-regulated DEGs

**Table S8** Primers used in this study.

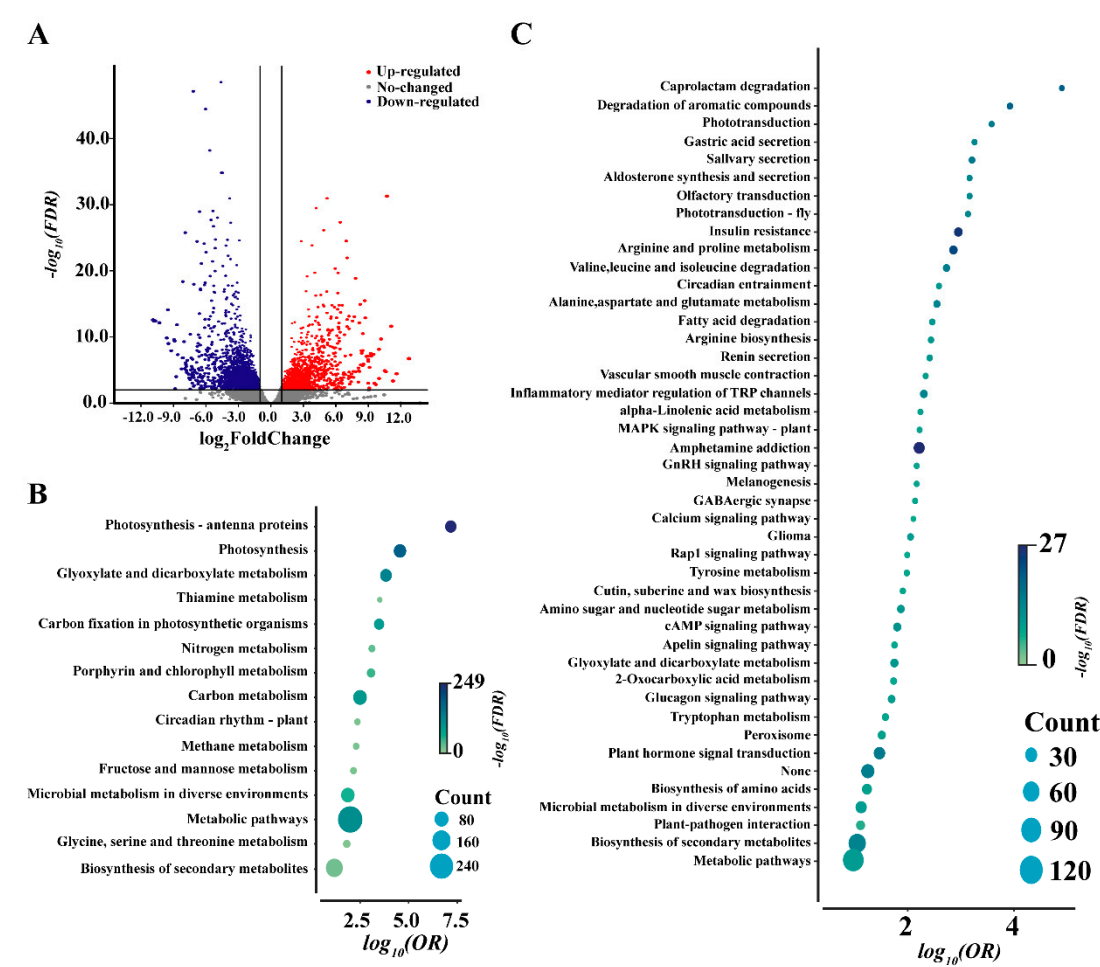

**FIGURE S1** Distribution of differentially expressed genes (DEGs) and Kyoto Encyclopedia of Genes and Genomes (KEGG) pathway analysis. (A) Volcano plots showing the DEGs distribution between

normal and severe drought stress conditions. **(B)** KEGG pathway analysis of the up-regulated DEGs. **(C)** KEGG pathway analysis of the down-regulated DEGs.

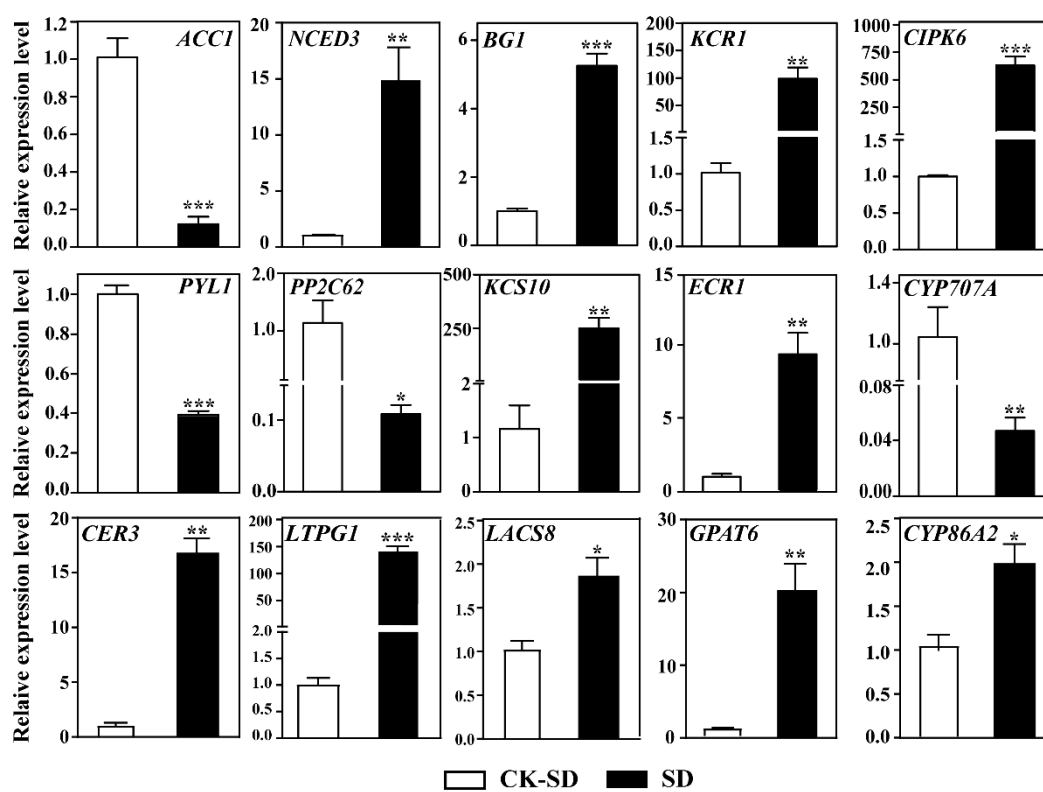

**FIGURE S2 Validation of RNA-seq data by qRT-PCR.** Acetyl-CoA-Carboxylase 1(*ACC1*); Nine-Cis-Epoxycarotenoid Dioxygenase 3(*NCED3*);  $\beta$ -Glucosidase 1(*BGI*); Ketoacyl-CoA Reductase 1 (*KCR1*); Calcineurin B-like Interacting Protein Kinase 6 (*CIPK6*); Pyrabactin resistance-Like 1(*PYL1*); clade-A type-2C protein phosphatases 62(*PP2C62*); Ketoacyl-CoA Synthase 10 (*KCSI10*); Enoyl-CoA Reductase 1 (*ECR1*); *CYP707A* encode 8'-hydroxylase; ECERIFERUM 3 (*CER3*); GPI-anchored lipid transfer protein 1 (*LTPG1*); Long-chain Acyl-CoA Synthetase 8 (*LACS8*); Glycerol-3-phosphate acyltransferase 6 (*GPAT6*). Cytochromes P450 *CYP86A2*. The data are the means  $\pm$  SD (n = 3). Statistical significance was determined by Student's T-test. \*p < 0.05, \*\*p < 0.01, \*\*\*p < 0.001.
