# Supplementary material for: Combining Physio-Biochemical Characterization and Transcriptome Analysis Reveal the Responses to Varying Degrees of Drought Stress in Brassica napus L
Source: Int J Mol Sci. 2022 Aug 2;23(15):8555. doi: 10.3390/ijms23158555 (PMC9368929; doi:10.3390/ijms23158555)
Supplement: Supplementary file 1 [file ijms-23-08555-s001.zip › Supplementary Table.xlsx]

## Sheet: S1
Gene ID	CK-SD-1	CK-SD-2	CK-SD-3	SD-1	SD-2	SD-3
BnaAnng14580D	12.196	11.175	13.519	15.998	27.164	14.577
BnaC04g38650D	3.066	3.206	1.896	3.536	6.738	6.378
BnaA06g01590D	1.91	1.144	3.264	1.157	1.053	1.532
BnaC06g41140D	6.098	7.269	7.826	3.614	5.464	6.947
BnaC03g69290D	14.386	18.827	3.128	3.395	4.4	8.109
BnaA06g38330D	4.422	4.817	4.121	4.92	5.948	3.121
BnaC05g12650D	3.905	5.703	2.418	3.522	3.392	1.917
BnaA08g22920D	1.019	2.349	0.707	2.581	0.925	6.243
BnaA06g12060D	8.784	11.707	2.337	6.535	3.282	17.662
BnaC08g17570D	1.033	0.93	0.134	0.717	0.195	2.122
BnaC05g13800D	8.404	9.212	2.198	6.314	3.338	17.541
BnaC08g06560D	14.128	11.597	6.411	7.303	7.562	5.586
BnaA08g06180D	15.523	11.81	6.987	8.122	9.592	7.683
BnaCnng75250D	13.921	12.984	23.16	11.412	14.381	24.219
BnaAnng41100D	7.909	4.378	0.099	1.682	0.841	0.475
BnaA08g25600D	27.74	21.253	22.712	17.632	14.617	16.89
BnaC08g14500D	0.141	0.232	0.207	0.128	0.301	0
BnaCnng67080D	31.214	24.354	30.508	32.026	31.367	41.305
BnaC09g14580D	20.062	14.835	23.28	20.094	22.837	29.143
BnaA09g53260D	25.742	21.598	21.801	21.506	17.521	17.368
BnaCnng53790D	0	0.131	0	0	0	0
BnaA08g26420D	20.045	26.98	24.548	26.236	42.866	23.995
BnaCnng06880D	46.483	43.546	29.139	36.284	50.965	26.664
BnaA08g26390D	0.874	1.195	5.567	0.916	0.72	0.712
BnaA09g03340D	1.513	3.62	1.544	3.908	1.108	0.675
BnaAnng28310D	7.327	11.358	16.622	17.178	17.16	29.099
BnaA02g30820D	16.414	12.746	18.346	14.335	18.357	13.928
BnaC09g02690D	12.931	17.024	1.118	29.545	44.972	3.537
BnaC02g39080D	1.889	2.566	1.976	2.432	4.255	4.041
BnaCnng43880D	20.551	15.374	16.671	13.063	12.745	11.662
BnaCnng35920D	37.175	18.923	32.204	13.001	13.391	10.677
BnaC05g28890D	38.091	22.817	30.316	20.052	22.2	18.552
BnaA05g16330D	31.936	24.776	25.591	18.508	17.381	15.221
BnaA08g06960D	46.665	23.765	37.38	21.899	26.427	22.933
BnaA09g24560D	0.273	0.315	0	0.041	0	0
BnaC02g27480D	15.255	29.339	19.214	15.513	29.281	20.959
BnaA02g36400D	13.646	14.666	14.578	9.039	11.451	13.335
BnaC03g32070D	18.929	18.55	24.48	23.859	22.007	21.278
BnaA10g00290D	17.618	17.289	16.42	18.25	21.584	18.278
BnaC05g00380D	9.724	8.435	10.365	12.284	12.796	16.37
BnaA09g36580D	0	0.122	0	0	0	0
BnaC04g24500D	12.79	13.147	26.524	26.063	12.032	5.744
BnaA04g02490D	0	0	0	0	0	0
BnaC04g24400D	29.654	14.327	79.941	28.804	10.847	8.365
BnaC04g24490D	0	0	0	0	0	0
BnaA04g02500D	0	0.067	0.059	0	0	0
BnaC04g24330D	314.653	154.293	609.162	919.351	208.172	144.252
BnaCnng07500D	120.046	141.641	160.988	872.399	360.756	262.295
BnaC08g28150D	23.036	50.503	15.736	40.101	12.261	49.87
BnaA09g36610D	41.614	69.957	7.624	35.413	15.485	13.636
BnaAnng23590D	0.087	0.172	0	0	0.279	0
BnaA07g17230D	105.394	147.021	141.488	1530.29	669.603	653.272
BnaA04g03060D	0	0	0	0	0.2	0
BnaCnng09200D	0.349	0.092	0.102	19.878	6.346	132.377
BnaA10g11680D	0.246	0.791	0	1.707	1.286	25.888
BnaA03g10070D	0	0.107	0.032	0.066	0.116	0.496
BnaCnng19590D	0.401	0.518	0.272	4.485	5.713	19.235
BnaA02g08090D	7.889	16.382	2.699	11.16	3.212	62.716
BnaC02g11200D	11.443	8.096	3.415	4.562	0.632	26.339
BnaA05g15230D	9.466	10.982	1.921	6.904	4.133	25.415
BnaC06g08850D	24.757	27.874	5.753	21.068	8.261	52.491
BnaA05g00640D	27.531	37.621	5.144	5.184	7.031	16.223
BnaA04g26960D	1.405	1.468	0.283	2.189	0.795	13.092
BnaC03g25940D	5.921	7.517	0	0.228	0.269	0.152
BnaC04g51420D	3.483	4.431	0.186	3.429	0.847	30.949
BnaCnng60230D	59.58	77.775	11.367	9.076	5.643	26.14
BnaCnng41300D	0.25	0.123	0.385	0.397	0	0.132
BnaC04g15310D	9.01	3.999	2.157	0.237	0	0.207
BnaA04g16900D	20.689	9.675	12.85	0.77	0.908	0
BnaC04g40260D	20.789	14.652	15.562	3.302	1.402	1.297
BnaCnng32820D	13.592	13.987	7.585	2.264	1.455	0.839
BnaC07g35800D	1.115	1.948	0.529	4.714	16.751	56.415
BnaAnng27240D	0	0	0	0	0.095	0
BnaA03g43960D	0.945	1.664	0.615	1.567	12.442	21.652
BnaC01g11650D	0.583	0.266	0.355	0	0	0
BnaC09g18860D	1.016	0.46	0.299	0.539	2.131	4.08
BnaC02g31560D	0.43	0.765	0.682	0	2.763	1.457
BnaA09g17560D	2.157	0.682	0.494	0.588	2.078	19.455
BnaCnng57040D	0.215	0.085	0.114	0.078	4.375	2.277
BnaA03g35180D	0.233	0.046	0	0	0	0
BnaA05g20890D	0	0.252	0	0.093	2.671	0
BnaCnng02380D	1.377	0.931	0.16	0.856	0.155	8.706
BnaA09g51710D	1.84	1.261	0.43	1.331	0.523	45.953
BnaC08g26140D	8.52	9.83	6.903	17.719	11.753	35.838
BnaA09g34930D	9.005	8.667	5.375	10.981	5.535	25.71
BnaA04g12460D	6.817	10.953	1.881	3.754	2.064	15.6
BnaC03g19130D	12.81	18.983	3.577	21.23	19.217	7.926
BnaA02g20010D	0.677	0.446	0	0	0	0
BnaA04g20360D	0.157	0.078	0.069	0.429	0	0
BnaC04g10440D	3.791	1.676	0.703	0	0.427	2.218
BnaA03g16020D	17.06	22.83	9.907	21.069	13.697	10.59
BnaCnng13910D	59.94	66.518	12.954	8.701	3.067	12.132
BnaA01g10780D	7.758	5.813	13.94	7.168	8.025	6.506
BnaC01g12360D	26.188	16.114	39.451	17.774	21.078	13.14
BnaC09g46070D	4.818	6.602	2.259	4.307	0.915	15.958
BnaA10g21780D	0.157	0.232	0.276	0.498	0.335	0
BnaA03g02950D	4.226	3.693	4.081	3.323	3.567	12.646
BnaC03g04350D	0.078	0	0.069	0.499	0.252	1.577
BnaA02g16200D	0	0	0	0	0	0
BnaA07g22900D	0.036	0	0	0	0	0
BnaC02g21680D	0	0	0	0	0.081	0
BnaC02g17470D	11.089	10.955	5.792	7.301	6.681	8.224
BnaC06g28830D	1.625	0.317	1.089	0.707	1.593	4.822
BnaA07g26670D	1.739	3.325	0.395	4.281	3.062	26.78
BnaA09g28160D	0.787	0.989	0.063	0.195	0.077	0.303
BnaA07g36830D	5.907	6.846	2.402	1.652	0.243	7.577
BnaC07g11110D	1.565	1.904	1.273	1.751	1.805	4.589
BnaC08g46130D	0.224	0.355	0.04	0.816	0.625	22.479
BnaC05g00770D	0.152	1.647	0	1.79	0.162	3.529
BnaC05g00780D	0.663	0.894	0.319	6.137	2.711	29.75
BnaA09g51530D	0.133	0.175	0	1.53	0.522	10.04
BnaA10g00700D	0.123	0.203	0.109	2.127	1.187	10.044
BnaA04g15380D	11.303	8.694	3.446	12.012	12.853	47.739
BnaC08g33100D	4.049	6.351	1.582	3.414	2.056	13.744
BnaA09g40640D	0.375	0.519	0.198	0.648	0.08	1.747
BnaC04g38330D	6.491	7.82	2.267	26.757	34.487	114.885
BnaA10g25350D	1.528	1.761	2.618	3.008	2.226	0.854
BnaC09g50350D	3.196	3.478	3.779	3.897	4.981	3.469
BnaA07g14020D	0	0	0	0	0	0
BnaA10g02480D	0	0	0.038	6.826	4.706	37.818
BnaCnng58900D	4.533	4.334	0.945	1.506	0.678	1.032
BnaAnng15520D	2.96	8.67	1.51	9.861	5.558	32.762
BnaAnng15510D	0.753	3.533	0.622	4.789	2.67	11.706
BnaC08g36720D	5.013	3.543	8.803	7.582	13.241	7.903
BnaA06g13570D	9.919	9.8	6.563	2.771	2.603	0.286
BnaA09g44160D	6.028	3.091	6.589	2.115	3.308	3.029
BnaA06g13650D	1.959	2.155	1.569	0.445	0.143	0.047
BnaA07g24600D	11.789	10.227	2.606	10.328	10.222	24.692
BnaA09g28510D	4.113	6.051	0.315	14.828	4.116	78.756
BnaA07g03590D	6.83	5.088	3.637	7.766	4.066	9.319
BnaC07g05570D	9.565	9.988	7.306	12.657	9.304	28.991
BnaA05g16170D	1.211	1.326	0.144	0.625	0.175	2.288
BnaC05g51350D	0.949	1.713	0.317	1.278	0.385	2.286
BnaAnng19690D	17.794	13.777	5.707	7.917	11.572	1.366
BnaC09g11030D	3.318	0.948	0.266	0.772	1.321	0.406
BnaC03g44430D	31.785	47.282	33.365	44.893	51.549	44.367
BnaA10g24190D	16.582	12.582	38.498	16.443	22.745	14.951
BnaA03g57930D	19.848	25.528	20.574	23.368	26.871	18.507
BnaA01g23830D	13.789	12.088	23.7	13.235	16.32	10.485
BnaA07g20920D	3.159	2.995	2.474	5.596	4.679	3.58
BnaC06g20910D	10.133	8.099	14.632	14.018	18.36	16.427
BnaA09g27660D	0.772	0.593	0.529	16.985	4.773	87.867
BnaAnng34520D	0	0	0	0	0	0
BnaA09g15160D	0.203	0.05	0.045	0	0	0
BnaCnng60030D	0.764	0.236	0.336	0.173	0.613	0.202
BnaC09g51620D	0.141	0.185	0.248	2.259	0.05	39.082
BnaC01g36910D	2.096	3.499	1.242	1.182	10.137	8.992
BnaCnng32080D	3.141	2.328	1.989	4.46	14.187	28.267
BnaA05g25030D	0.138	0.854	0.366	2.136	7.623	5.38
BnaA01g09900D	1496.32	1397.88	843.104	50.288	60.654	41.625
BnaC01g11550D	1246.02	1600.08	564.281	58.408	54.123	40.407
BnaC07g44600D	8.65	12.92	4.484	7.722	42.76	30.436
BnaA08g11740D	9.803	12.358	9.222	6.449	103.734	42.753
BnaC03g66270D	24.584	17.21	11.671	8.617	145.101	76.768
BnaA03g50740D	11.538	15.938	3.45	8.54	21.741	19.842
BnaA05g12190D	38.148	21.446	48.162	24.382	24.457	25.015
BnaC04g14600D	22.559	12.805	21.05	13.306	13.725	16.095
BnaA04g27290D	3.133	4.093	4.066	3.214	3.462	6.347
BnaC04g13680D	4.956	4.39	6.024	5.746	3.293	1.267
BnaC08g32100D	8.868	13.733	6.672	13.898	40.213	27.848
BnaA09g39770D	7.038	6.851	5.38	8.229	16.453	11.176
BnaC04g21400D	2.085	3.514	0.919	2.452	2.363	0
BnaC04g00380D	1.382	1.943	2.576	1.835	27.2	14.519
BnaA03g56500D	0.19	0.063	0	0	0	0
BnaC04g46830D	0	0	0	0	0	0
BnaA01g03410D	15.771	6.394	8.567	4.469	6.565	4.428
BnaC01g04690D	24.837	15.153	16.391	10.58	7.521	6.146
BnaAnng40740D	23.613	12.809	15.949	12.464	10.527	8.554
BnaC07g34880D	29.741	41.997	53.354	35.987	44.851	29.057
BnaC08g11070D	38.626	28.48	32.729	2.381	2.317	0.724
BnaA08g08460D	37.463	33.375	21.18	12.397	14.488	16.277
BnaCnng65400D	8.565	5.453	2.348	1.038	1.426	4.735
BnaA03g43410D	19.692	22.941	18.219	17.894	18.709	9.729
BnaC07g19450D	5.247	9.634	3.882	2.294	1.484	3.563
BnaC09g19620D	57.33	41.467	64.401	12.275	18.506	8.087
BnaAnng26820D	12.264	13.65	18.125	4.162	6.232	4.355
BnaA06g40360D	14.995	19.136	11.561	3.812	1.72	2.929
BnaA09g40690D	0.99	1.304	0.582	1.499	0.589	0
BnaC08g33170D	0.881	1.197	0.485	0.5	0	0
BnaA03g17720D	21.54	8.86	7.05	1.278	0.565	0
BnaA04g21960D	63.214	40.39	44.931	2.157	1.129	0.838
BnaC04g56560D	43.378	24.607	17.601	0.684	0	0.885
BnaC03g21240D	4.764	3.312	1.088	0.321	0	0
BnaA04g29300D	24.075	6.717	3.453	0.145	0	0
BnaA03g19030D	24.571	14.673	5.196	0	0	0
BnaA03g26790D	137.99	113.408	111.896	83.091	56.764	63.472
BnaC03g31730D	180.721	102.459	263.244	114.631	132.261	104.955
BnaCnng74890D	0.923	1.481	1.118	0.734	0.494	5.005
BnaC05g00450D	12.577	16.487	4.901	18.021	4.272	97.296
BnaA10g00370D	5.654	5.338	1.845	10.58	0.986	37.776
BnaCnng08770D	4.734	6.308	0.842	4.539	1.488	28.278
BnaC01g28850D	10.034	8.722	5.654	24.172	29.434	30.055
BnaA01g23120D	17.272	16.324	13.088	34.214	30.384	19.26
BnaC08g42270D	6.729	7.93	6.903	8.778	11.885	7.581
BnaA06g06740D	33.129	29.937	32.293	22.217	24.899	19.688
BnaC05g08410D	31.632	29.244	30.556	21.711	25.111	23.758
BnaA08g25520D	24.508	17.786	15.176	21.104	16.33	21.774
BnaA09g47860D	4.86	5.488	4.457	6.94	7.804	8.033
BnaC06g20490D	4.487	5.017	3.302	0.986	1.108	2.505
BnaC04g35560D	1.609	1.272	0.964	7.781	9.717	4.635
BnaA04g13420D	15.847	21.041	12.194	35.121	49.896	23.685
BnaA01g06180D	2.067	7.647	11.926	51.885	96.652	136.252
BnaC03g67810D	10.517	20.611	12.958	48.132	50.158	91.196
BnaC07g43040D	16.293	17.533	28.48	31.732	24.135	27.178
BnaC01g07450D	2.387	8.883	17.527	69.952	116.989	197.234
BnaA08g12770D	7.258	13.704	8.854	34.184	34.57	52.1
BnaA03g51180D	24.66	29.497	45.319	56.221	49.355	48.39
BnaC03g19520D	0	0.044	0.039	3.053	2.793	21.485
BnaA01g20710D	26.619	33.918	18.72	26.042	48.309	41.77
BnaC08g20870D	0	0.042	0.037	0.154	0	0
BnaC01g25960D	26.259	27.058	21.995	20.327	38.002	17.972
BnaA06g16100D	0	0.043	0	0	0	0
BnaC03g27120D	2.308	5.511	4.492	3.802	3.295	1.935
BnaC04g16630D	0.463	0.114	0.102	0.105	0	0
BnaA02g07120D	0	0.098	0	15.533	22.235	362.448
BnaA04g15990D	23.533	37.805	40.389	47.603	64.95	46.576
BnaC03g68390D	1.857	2.374	2.79	3.969	1.929	3.642
BnaAnng08820D	2.351	2.812	2.29	1.687	2.252	5.502
BnaC08g18880D	0.324	0	0.572	0.295	0.868	0
BnaAnng37890D	20.859	16.778	21.591	17.475	20.752	18.635
BnaC03g05090D	6.958	8.015	4.909	5.156	4.123	2.745
BnaA07g28260D	0	0	0	0	0	0
BnaC01g05170D	9.554	9.812	8.455	8.301	11.888	10.248
BnaA03g29800D	13.236	10.462	29.569	16.131	20.254	26.377
BnaC03g31860D	3.515	3.534	2.5	4.371	3.763	1.371
BnaA06g27220D	0	0	0	0	0	0
BnaC03g71020D	5.828	5.895	6.908	6.83	6.437	6.145
BnaC01g34440D	14.632	13.233	6.873	3.666	3.513	2.278
BnaA09g29950D	0	0	0	0	0	0
BnaC09g35510D	2.548	2.147	1.717	0.954	1.204	1.19
BnaC08g36210D	11.672	12.944	15.374	22.728	23.97	20.048
BnaC03g61020D	9.194	11.968	8.047	6.887	5.054	6.511
BnaA05g13680D	4.693	6.394	3.83	3.232	3.437	2.563
BnaA03g57470D	0	0	0	0	0	0
BnaC09g52810D	0	0	0	0	0	0
BnaA06g19580D	15.797	18.334	13.844	15.281	24.911	17.758
BnaA02g01590D	0.156	0.423	0	0.777	0.458	1.853
BnaC08g11950D	0	0	0	0	0	0
BnaA01g22970D	0.136	0.09	0.24	0.165	0.194	0.24
BnaC04g52580D	8.145	17.936	11.89	45.993	65.418	55.556
BnaAnng11040D	0	0	0	0	0	0
BnaAnng35600D	0	0	0	0	0	0
BnaA09g55650D	5.62	7.091	6.128	6.472	7.624	5.831
BnaC08g21610D	0	0	0	0.201	0	0
BnaA09g11060D	0.07	0.069	0	0.064	0.601	0
BnaC02g09500D	0	0	0	0	0	0.468
BnaA04g26070D	16.252	25.363	17.995	20.192	23.556	12.028
BnaA08g13680D	0	0	0	0	0	0
BnaC07g01760D	0	0	0	0	0	0
BnaC03g26530D	8.671	2.391	25.172	8.368	3.454	2.775
BnaUnng02540D	0.594	0.251	1.046	0.308	0	0.404
BnaC09g43120D	7.294	16.723	8.684	11.131	8.225	8.606
BnaA01g22230D	34.715	37.307	40.257	49.465	50.999	47.5
BnaA01g19170D	5.495	3.059	4.303	5.27	4.761	3.509
BnaA10g03050D	6.75	11.184	4.729	9.22	9.022	11.674
BnaC02g10010D	3.229	2.002	1.785	1.266	1.491	2.413
BnaC05g31490D	5.775	6.726	6.374	7.291	6.897	6.95
BnaA07g17330D	0	0	0	0	0	0
BnaA06g28910D	0.293	0.325	0.516	0.432	0.235	0.504
BnaCnng49470D	1.581	2.343	1.006	2.155	3.384	1.209
BnaA03g42340D	1.573	1.13	1.722	1.689	0.868	0.252
BnaC03g08860D	5.05	6.335	2.378	4.613	3.947	2.687
BnaC05g27690D	7.652	9.023	6.699	10.453	10.147	10.348
BnaC08g08040D	46.305	46.865	27.393	53.648	43.866	46.2
BnaA10g21870D	9.765	6.048	36.343	19.204	15.602	9.412
BnaC08g14080D	3.887	3.925	2.594	2.935	3.457	3.631
BnaA02g10340D	0.471	0.133	0.297	0.551	0	0
BnaA01g26970D	0	0	0	0	0	0
BnaA06g37160D	6.938	8.3	5.419	4.396	2.75	2.362
BnaA09g46150D	9.589	7.071	6.367	7.324	9.967	13.094
BnaA05g04220D	8.934	27.051	6.952	25.302	24.219	66.94
BnaC04g45190D	0	0	0	0	0	0
BnaA06g09840D	0	0	0	0	0	0
BnaC01g05290D	0	0	0	0	0	0
BnaA10g12550D	4.821	0	1.062	0	11.288	2.233
BnaAnng18580D	15.778	14.183	17.075	17.003	15.321	18.774
BnaC09g45610D	82.086	135.522	102.669	66.731	115.216	75.048
BnaC06g32150D	1.549	0.868	0.76	0.914	0.564	1.116
BnaA09g35790D	0.368	0.121	1.296	0.557	0.394	0.389
BnaC03g66810D	3.117	4.339	6.679	0.772	0.531	1.5
BnaA03g35770D	18.747	21.208	13.563	21.912	39.382	27.36
BnaA05g02740D	19.153	18.923	47.665	40.924	50.566	59.46
BnaA04g28700D	190.137	147.84	125.071	139.974	123.902	98.284
BnaAnng19060D	1.027	0.312	1.67	0.167	0.338	0
BnaC03g07190D	2.008	3.591	2.781	1.738	1.536	0.304
BnaCnng28290D	4.424	5.245	11.138	10.338	19.757	16.862
BnaAnng10740D	6.229	7.61	6.156	9.256	10.138	2.896
BnaC02g46020D	0.594	0.464	0.37	0.112	0.132	0.393
BnaCnng66990D	2.786	2.863	4.91	4.81	1.849	3.126
BnaA01g01010D	0.43	0.354	0.505	1.043	3.531	0.455
BnaC07g13070D	2.562	4.177	3.951	9.08	13.028	12.477
BnaC02g16830D	0.133	0.132	0.117	0.727	0.285	2.539
BnaC09g14570D	1.387	1.814	0.396	1.594	1.878	5.184
BnaA07g04350D	7.391	5.85	7.101	7.242	5.672	4.478
BnaC08g48170D	23.987	22.658	38.561	35.388	21.408	23.81
BnaC06g43580D	51.362	42.584	64.587	39.558	29.195	30.785
BnaA06g17120D	26.05	40.331	30.732	36.698	49.783	38.59
BnaA07g20560D	82.801	65.671	131.463	101.174	68.373	85.515
BnaA10g24310D	19.982	16.769	25.56	25.238	17.592	30.302
BnaC06g01820D	5.38	3.733	2.53	3.653	7.15	4.352
BnaAnng38250D	4.507	3.447	1.409	2.994	1.66	2.001
BnaA08g13660D	7.734	8.036	7.95	10.259	10.134	14.116
BnaC05g40580D	0	0	0	0	0	0
BnaA04g26690D	0	0	0	0	0	0
BnaC09g16940D	14.267	13.849	14.154	21.985	15.38	33.852
BnaC08g42330D	1.46	0.59	0.701	0.482	0.213	1.826
BnaA03g28810D	13.59	18.81	18.614	25.31	20.814	22.435
BnaA01g11780D	0	0	0	0.109	0	0.042
BnaA04g04200D	0.114	0	0	0.052	0.061	0
BnaA10g19350D	2.891	8.679	4.507	4.143	2.202	1.295
BnaAnng32130D	2.904	2.869	10.714	4.948	7.577	1.921
BnaA06g36310D	0.139	0	1.186	0.211	0.348	0
BnaC03g43120D	10.499	4.385	2.858	5.43	2.01	14.73
BnaA08g02860D	5.779	6.649	5.994	5.916	6.813	5.963
BnaC06g37460D	1.509	1.822	0.369	0.914	0.583	0.044
BnaC09g05510D	14.239	8.961	0.392	15.862	6.485	0
BnaC07g47570D	39.207	24.382	95.573	3.617	0.639	0
BnaC05g12170D	0.701	1.184	1.056	1.222	0.907	2.723
BnaC06g35900D	15.602	4.668	18.47	1.84	2.125	2.522
BnaC05g43000D	0.967	1.075	1.207	1.172	0.949	1.535
BnaA05g29560D	0	0	0	0.432	0.339	1.425
BnaA06g37020D	0.305	0.468	0.418	0.769	0.471	1.111
BnaC05g08190D	6.852	8.574	5.534	3.424	2.689	1.753
BnaA07g19500D	0.313	0	0.414	0	0	0
BnaA05g28920D	2.692	3.082	2.726	3.178	2.397	2.264
BnaAnng28630D	0.141	0.698	0.311	0.514	0.529	5.684
BnaC06g35430D	0	0	0	0	0	0
BnaA06g19620D	14.739	7.193	6.346	4.441	3.971	3.075
BnaA09g22010D	48.327	24.717	65.34	22.243	28.324	24.485
BnaAnng07070D	19.278	9.742	21.135	18.726	7.887	14.661
BnaA04g24340D	1.766	1.2	2.529	0.903	0.532	1.227
BnaCnng35900D	0	0	0	0	0	0
BnaC07g34610D	0	0	0	0	0	0
BnaA07g34380D	0.136	0.268	0.956	1.232	1.452	0
BnaC08g13800D	1.628	2.12	2.282	2.354	1.901	1.802
BnaA04g07410D	0	0	0	0	0	0
BnaC09g49320D	2.298	3.312	0.813	2.157	2.036	2.273
BnaC09g36580D	8.811	2.885	14.063	5.444	3.072	5.063
BnaA06g13660D	0	0	0	0	0	0
BnaC01g16190D	1.534	4.697	1.216	1.115	1.806	0
BnaAnng16420D	36.913	37.233	29.934	34.949	24.397	21.096
BnaA05g09700D	2.696	0.962	5.278	2.654	1.443	1.189
BnaA03g13890D	7.418	10.086	8.455	12.678	7.796	13.69
BnaC01g34570D	0.405	1.2	0.446	0.552	1.625	1.393
BnaA06g19440D	22.552	22.726	133.931	65.987	63.251	159.96
BnaC09g03100D	4.061	5.453	0	2.697	2.731	0
BnaA09g35090D	0	0	0	0	0	0
BnaCnng56050D	0.077	0.306	0.137	0	0	0
BnaC01g43430D	0.111	0	0	0	0	0
BnaCnng08620D	0	0.089	0	0.244	0	0.665
BnaA03g16360D	0.093	0.138	0.041	0.254	0.05	0
BnaCnng71190D	0.092	0.454	0	0	0	0
BnaA07g32320D	336.878	237.302	523.558	470.33	282.757	145.028
BnaA09g43710D	12.78	24.034	13.661	16.683	17.709	22.664
BnaC02g39680D	1.294	1.654	2.28	1.971	1.263	0.806
BnaC01g18790D	6.037	6.013	9.039	6.11	7.041	1.559
BnaA09g47280D	8.479	4.497	6.213	5.677	4.109	4.819
BnaC03g10240D	119.612	60.309	160.588	151.164	307.663	164.606
BnaC03g11500D	0.894	0.136	0	0.062	0.074	0
BnaA03g31290D	102.017	62.401	69.038	88.254	60.278	34.416
BnaC07g01660D	3.115	1.901	4.359	3.413	3.629	5.722
BnaC02g30360D	0	0	0	0	0.262	0
BnaA05g26900D	61.747	60.123	90.795	70.156	59.995	36.033
BnaC05g24660D	0	0	0	0	0	0
BnaA04g12260D	19.002	21.362	31.85	38.205	27.472	45.55
BnaC08g27690D	0.3	0	0.118	0.121	0.357	0
BnaA03g57020D	9.178	8.088	6.113	3.602	4.059	2.144
BnaA07g24990D	8.816	8.078	6.36	9.923	5.93	8.628
BnaC04g54320D	2.571	1.841	3.001	3.446	1.582	0.476
BnaC05g07280D	0	1.183	0.821	0	0	0
BnaC08g03010D	0	0	0	0	0	0
BnaA05g06970D	16.696	17.441	52.935	26.114	19.924	26.657
BnaA09g21470D	0.682	0.548	1.014	2.169	0.502	0.496
BnaC05g27230D	2.387	3.255	1.6	1.039	0.072	0.57
BnaC03g33070D	0.42	0.363	0.139	0.43	0.056	2.28
BnaAnng05590D	26.058	22.923	28.864	20.286	18.959	12.761
BnaAnng22690D	2.492	2.257	3.66	1.982	2.557	0.66
BnaC01g31660D	3.88	4.718	2.702	2.959	3.341	3.706
BnaC09g44380D	6.783	6.177	4.692	5.381	2.909	2.152
BnaC07g33960D	29.737	31.047	41.534	27.258	22.728	18.696
BnaCnng62720D	12.664	13.754	9.513	13.425	13.252	14.824
BnaA03g34080D	0.439	0.26	0.155	0.159	0.376	0
BnaC02g47650D	0	0	0.19	0.098	0.347	0
BnaC03g52370D	11.961	15.908	10.134	15.274	23.26	18.282
BnaC05g36060D	1.362	1.056	0.321	0.459	0.591	0.224
BnaA01g25920D	17.288	16.137	12.068	13.822	16.855	17.173
BnaC01g32200D	0.174	0.429	0.249	0.809	0.209	1.264
BnaA07g07590D	26.101	17.884	18.613	22.83	12.712	23.882
BnaA05g04990D	19.64	22.655	29.84	26.529	31.708	30.682
BnaA03g25420D	0.521	0	0.459	1.066	1.395	0.138
BnaC02g44960D	0	0	0	0	0	0
BnaA06g23420D	17.787	13.421	10.014	12.924	18.141	12.031
BnaCnng64790D	2.722	7.06	0.36	0.618	1.02	2.017
BnaA06g25230D	0	0	0	0	0	0
BnaC08g00330D	2.066	4.388	5.142	4.458	4.533	6.451
BnaC07g21260D	1.917	2.184	0.954	0.348	1.28	0.191
BnaA03g17410D	12.818	5.591	15.259	3.841	4.963	8.878
BnaA03g36680D	0	0	0	0	0	0
BnaC07g44180D	7.231	4.366	7.876	4.745	5.053	8.931
BnaCnng27540D	71.074	58.625	61.028	31.295	27.983	37.066
BnaC01g34900D	21.833	17.928	28.481	28.857	30.758	34.92
BnaA03g47380D	0	0	0	0	0	0
BnaC08g45790D	2.797	3.558	1.772	5.448	7.886	3.367
BnaC06g20590D	12.806	18.019	8.402	11.032	24.925	16.843
BnaC04g39350D	1.731	2.052	2.135	3.963	1.334	6.596
BnaA09g42200D	2.34	1.572	3.175	1.191	1.603	0.991
BnaC03g63410D	148.784	237.772	57.382	72.418	42.02	30.117
BnaA07g06380D	1.354	0.794	1.603	0.884	1.177	1.567
BnaC06g26720D	6.324	7.725	5.526	7.415	4.916	4.222
BnaC06g40310D	0	0	0	0	0	0
BnaC07g21200D	13.306	15.78	11.748	8.689	9.63	6.729
BnaA07g12320D	7.335	9.162	4.47	10.57	8.267	12.657
BnaCnng24050D	0	0	0	0	0	0
BnaC06g39350D	9.653	13.79	9.124	12.869	6.913	10.459
BnaA01g25730D	13.092	14.622	12.174	9.452	12.686	5.643
BnaAnng20550D	10.571	6.788	5.537	1.654	0.754	0.87
BnaA02g13150D	3.673	3.511	7.537	1.959	1.42	1.48
BnaA03g24530D	37.821	28.798	35.508	39.599	55.153	31.013
BnaC03g60540D	5.12	2.96	3.335	5.667	2.478	2.191
BnaC02g06410D	25.191	13.183	35.44	23.449	11.698	26.547
BnaCnng51070D	4.991	2.241	0.4	1.649	0.486	1.921
BnaA09g50480D	2.557	3.18	1.748	2.364	1.935	2.334
BnaC05g32840D	1.852	1.433	2.502	1.795	2.015	4.051
BnaA09g38810D	0.27	0.16	0.763	0.049	0.232	1.145
BnaC03g70740D	1.553	2.803	2.158	3.04	3.133	4.3
BnaAnng08190D	0	0	0	0	0	0
BnaA01g19750D	735.561	633.906	863.885	559.101	655.135	431.01
BnaA03g59790D	0.062	0.122	0	0	0.132	0
BnaA08g16670D	0	0	0	0	0.048	0
BnaAnng27200D	78.382	113.662	44.36	108.294	121.31	22.963
BnaC09g27930D	0.995	1.278	0.438	0.814	0.107	0
BnaA01g11490D	6.202	5.295	7.152	6.714	3.689	5.107
BnaC06g05520D	5.405	4.476	4.832	5.778	6.892	10.855
BnaA06g36910D	0.863	0.183	1.467	0.841	0.33	1.11
BnaC02g21290D	0	0	0	0	0	0
BnaAnng27820D	0.927	0.981	0.117	0	0.071	0.21
BnaC09g09920D	1.476	0.802	0	1.676	1.264	0.156
BnaC04g52130D	5.728	5.984	3.703	4.138	5.378	7.232
BnaAnng28530D	1.03	0.792	0.437	1.109	1.103	0.929
BnaC09g20330D	4.979	3.716	9.708	3.947	11.681	10.318
BnaC01g31560D	5.697	8.442	10.517	4.437	5.808	10.338
BnaCnng13280D	1.382	1.741	1.007	2.922	1.377	3.102
BnaC08g47160D	3.007	1.529	2.844	0.964	1.799	1.591
BnaA06g22230D	26.541	11.337	26.323	5.709	2.333	1.629
BnaC06g03630D	34.157	6.738	35	10.363	10.689	8.896
BnaCnng20360D	3.753	5.297	0.551	2.274	1.339	1.135
BnaC01g02280D	0	0.04	0	0	0	0
BnaA02g29480D	0	0	0	0	0	0
BnaC05g45870D	0	0	0	0	0	0
BnaCnng15870D	13.333	11.526	0	10.362	15.775	0
BnaC02g09990D	5.521	6.819	11.622	7.247	5.418	10.635
BnaA07g23760D	2.008	1.701	1.685	2.086	0.102	0
BnaCnng22210D	6.166	10.085	7.442	12.149	7.821	10.972
BnaA01g37390D	1.397	1.68	1.927	0.717	1.235	1.029
BnaA03g38840D	0	0	0	0	0	0
BnaA03g47020D	1.545	1.947	2.065	4.356	1.654	2.368
BnaA06g23630D	0.936	2.96	0.165	5.276	15.037	7.733
BnaA09g11470D	53.358	55.273	145.099	48.747	64.355	52.224
BnaCnng47600D	57.213	54.256	89.31	67.447	59.23	60.133
BnaC06g27810D	7.528	4.419	8.46	4.527	3.426	4.466
BnaCnng50640D	7.872	5.438	6.26	6.455	7.194	6.233
BnaC02g23560D	3.573	4.707	2.099	2.165	3.825	3.278
BnaA05g04170D	2.431	2.662	1.042	1.314	0.914	2.435
BnaA01g34050D	38.078	45.143	82.075	75.865	73.295	131.084
BnaCnng42380D	0	0	0	0	0	0
BnaC01g12510D	16.58	17.763	36.713	23.871	28.352	21.656
BnaA07g12500D	0.134	0	0	0	0	0
BnaA09g06260D	4.801	5.148	1.444	1.596	0.689	0.186
BnaA06g20540D	0.038	0.15	0	0.035	0	0.04
BnaA07g16120D	1.177	3.053	3.76	5.349	2.678	11.528
BnaC05g08980D	3.697	3.592	4.072	4.704	7.19	5.349
BnaA03g24970D	0.695	0.065	0.146	0.271	0.744	0
BnaAnng37790D	3.074	4.269	6.359	4.453	5.484	5.046
BnaA09g15970D	25.754	34.144	28.659	55.849	31.61	27.382
BnaC07g30420D	1.383	1.394	0.895	1.923	3.746	3.645
BnaC04g32070D	34.676	36.094	33.664	24.645	56.609	26.352
BnaA03g57010D	50.044	51.209	22.077	20.298	66.059	4.421
BnaC04g51610D	318.888	310.442	262.439	103.955	87.129	64.824
BnaC09g33840D	3.239	1.504	2.545	3.582	1.588	4.834
BnaC01g28810D	2.516	2.398	2.022	2.086	0.709	2.009
BnaC08g19990D	0	0	0	0	0	0
BnaA10g22870D	0.188	0.633	0.332	1.437	1.411	3.15
BnaC03g66710D	8.198	10.747	13.752	19.77	12.067	15.522
BnaA01g08150D	136.4	120.285	155.234	55.54	68.843	59.585
BnaA01g35230D	0.185	0.122	0.054	0	0.198	0
BnaA09g43060D	10.301	12.697	19.449	19.344	15.753	26.172
BnaAnng15930D	10.304	11.915	12.38	12.449	23.815	19.089
BnaCnng27260D	21.875	22.609	6.82	21.483	20.445	20.397
BnaC01g29290D	6.902	6.202	4.982	3.832	3.785	5.225
BnaC03g15980D	21.418	15.192	56.615	24.053	9.171	10.349
BnaC06g17380D	1.058	1.11	5.883	2.103	4.175	2.45
BnaC09g11960D	3.028	3.871	1.726	3.56	4.862	2.168
BnaC01g36400D	3.766	9.126	6.005	6.519	7.104	8.165
BnaA07g19670D	8.689	4.292	3.977	3.845	5.436	6.57
BnaA09g42170D	0.214	0	0	0	0	0
BnaA08g16780D	3.968	5.988	2.843	3.249	2.147	1.939
BnaA03g19840D	7.502	5.772	4.727	5.557	3.65	1.179
BnaA03g39880D	4.347	6.422	3.756	7.632	4.518	6.702
BnaC05g35730D	12.878	10.431	15.845	18.661	23.97	36.602
BnaC07g39510D	2.464	2.752	2.124	1.655	2.122	2.495
BnaA07g29190D	7.664	9.909	5.302	10.229	8.285	7.702
BnaA10g22550D	1.802	1.326	1.723	4.251	1.149	0.852
BnaC02g37030D	0	0.266	0.712	0.326	0.384	0
BnaA09g44400D	4.583	4.409	3.746	3.124	2.292	3.639
BnaA06g30110D	1.97	4.086	4.165	5.369	4.112	5.421
BnaCnng14140D	19.056	12.688	34.495	17.505	9.535	8.771
BnaAnng15170D	5.247	7.313	5.738	4.428	5.918	3.422
BnaAnng17850D	3.107	1.187	1.278	4.179	3.725	2.456
BnaCnng35050D	3.487	2.915	3.876	4.582	2.067	8.234
BnaC02g08730D	8.162	2.549	11.325	6.138	0	9.435
BnaA10g16970D	0	0	0	0	0	0
BnaA07g20250D	13.875	13.371	9	13.691	11.8	16.175
BnaA09g03450D	0.268	0.617	0.315	0	0.096	0.756
BnaC08g02460D	32.46	34.65	26.653	44.153	36.093	60.854
BnaA02g04680D	18.811	15.191	17.728	13.922	15.468	16.97
BnaA03g24240D	8.911	9.652	9.271	6.536	7.47	5.342
BnaC05g19640D	25.603	19.871	25.727	22.868	33.804	23.658
BnaC02g45530D	0	0	0	0	0	0
BnaCnng43760D	0.082	0	0	0	0	0
BnaA02g16890D	4.046	5.436	4.848	5.294	3.985	3.769
BnaA02g04440D	0	0	0	0.368	0.163	0
BnaC08g45190D	0.531	0.131	1.325	0.844	0.189	0.187
BnaC05g10550D	8.198	10.981	11.877	17.692	6.751	17.107
BnaAnng11140D	2.509	3.254	6.91	2.28	1.511	9.962
BnaA02g03020D	3.892	6.317	2.138	6.017	7.061	2.863
BnaC06g11760D	22.842	19.601	49.568	67.368	23.474	36.894
BnaA09g42320D	3.953	4.757	8.217	4.421	3.364	4.346
BnaC03g38830D	38.586	65.605	27.937	10.691	6.724	6.017
BnaA02g14980D	0.333	0.082	0	0.038	0	0
BnaA05g07910D	1.001	2.355	1.011	1.551	0.819	1.433
BnaC08g25980D	9.224	3.108	4.221	1.754	4.134	2.347
BnaA08g00150D	23.936	18.8	11.41	8.844	3.327	3.694
BnaC04g28160D	0	0	0	0	0	0
BnaAnng00410D	14.829	14.445	14.593	5.604	3.19	0.587
BnaA10g14710D	22.857	15.394	18.92	5.945	7.236	4.368
BnaA02g26190D	14.982	14.77	12.98	14.24	10.032	7.963
BnaC09g24980D	12.127	15.922	12.674	12.641	16.859	18.618
BnaA03g15400D	3.63	5.123	8.028	5.654	6.027	11.057
BnaA10g11360D	2.174	3.376	2.956	2.371	3.658	3.814
BnaA02g13080D	5.688	2.759	2.688	2.303	1.163	1.04
BnaC07g34010D	24.733	27.239	38.512	29.106	17.361	11.418
BnaCnng47960D	31.216	21.848	37.091	29.27	22.455	33.046
BnaA09g31180D	0	0	0	0	0	0
BnaA03g04140D	28.273	17.376	15.497	13.78	16.312	16.248
BnaA04g03290D	15.833	15.189	15.828	27.182	29.654	19.674
BnaA05g27980D	2.964	2.355	4.315	0.995	0.345	0.477
BnaC07g09760D	0.544	0.202	0.18	0.402	0.109	0.108
BnaC09g09250D	12.987	5.322	2.373	10.594	4.187	6.171
BnaA09g13350D	0.025	0.075	0	0	0.162	0
BnaA01g19280D	91.247	46.332	137.11	44.419	46.223	41.399
BnaA03g05340D	0	0	0	0	0	0
BnaCnng18440D	0	0	0	0	0	0
BnaA09g06500D	0	0.05	0	0	0.055	0
BnaC06g36630D	26.403	28.989	17.528	35.167	38.089	35.035
BnaA09g52500D	1.158	0.176	1.883	0.647	0.095	1.98
BnaA07g39050D	81.339	49.348	104.292	49.131	60.109	31.226
BnaA09g50370D	1.084	4.283	5.889	5.416	6.381	7.84
BnaA06g20430D	0	0	0.557	0	0	0
BnaAnng21780D	0	0	0	0	0	0
BnaA04g07110D	3.724	4.544	0.193	5.374	0.703	0.928
BnaC08g31970D	216.041	51.628	285.177	86.156	66.588	30.552
BnaC03g10690D	8.843	10.505	8.58	11.849	13.42	14.575
BnaC08g41490D	2.135	0.738	0	1.261	0	0
BnaC03g43830D	0	0	0	0	0	0
BnaC04g05180D	17.95	13.411	15.378	15.498	17.352	13.791
BnaC04g08100D	146.246	118.535	130.683	4.5	5.1	6.172
BnaC04g19700D	6.808	7.79	4.898	5.403	5.12	4.927
BnaA09g52990D	0.262	0.713	0	0.238	0.562	1.875
BnaC04g13220D	1.466	0.543	0.161	0.666	0.392	2.91
BnaC08g25470D	1.736	1.514	0.84	0.34	0.255	0.505
BnaC02g48530D	0	0	0	0	0	0
BnaCnng21450D	29.044	20.988	51.071	27.718	20.298	27.324
BnaA03g56720D	5.38	4.515	3.37	5.33	2.463	2.402
BnaAnng27030D	0.712	0.282	1.255	1.813	0.61	3.017
BnaC03g35330D	0.44	0.217	0.166	0.342	0.134	0
BnaA06g12050D	0	0	0	0	0	0
BnaC05g34120D	4.544	4.966	1.533	4.436	1.449	4.196
BnaCnng16590D	1.694	2.961	1.837	0.592	0.279	0.552
BnaA03g36700D	2.897	2.394	0.975	1.292	0.282	1.227
BnaAnng26900D	10.116	1.511	7.359	21.592	37.399	8.593
BnaC09g07310D	3.695	2.113	1.371	0.088	0	0
BnaC04g20880D	15.414	15.596	10.514	12.471	14.402	12.561
BnaC04g00590D	2.106	0.903	4.59	0.126	1.038	0.293
BnaC02g05640D	0	0	0	0	0	0
BnaA08g14800D	0.24	0.148	0.026	0.109	0.481	0
BnaC04g04380D	0	0	0	0	0	0
BnaA09g48360D	0	0	0	0	0	0
BnaC09g47560D	3.294	1.816	6.48	2.785	1.558	2.757
BnaA07g01140D	8.71	5.163	6.791	9.354	9.72	12.686
BnaC06g28520D	16.654	6.564	35.358	12.477	42.293	2.344
BnaC09g48800D	3.082	2.664	4.607	3.251	3.123	4.719
BnaC07g45200D	2.759	7.059	8.459	2.833	4.194	30.491
BnaC04g06800D	11.372	13.491	4.427	14.608	43.513	15.23
BnaAnng12110D	0	0	0	0	0	0
BnaC09g41620D	0.424	0.559	0.498	0.9	0	0.449
BnaC06g19830D	0.062	0	0.379	0.335	0.066	0
BnaA10g20030D	5.247	8.238	6.845	12.308	10.973	9
BnaC05g32630D	0	0	0	0	0	0
BnaA03g31200D	33.694	38.7	17.602	28.442	36.365	24.072
BnaC08g40330D	38.163	39.534	21.932	14.882	28.683	10.127
BnaA09g19590D	1.654	1.877	2.538	2.172	3.936	3.373
BnaA04g19900D	0	0	0	0	0	0
BnaA03g15540D	5.283	3.43	5.054	5.486	8.079	8.309
BnaA10g23870D	0	0	0	0	0	0
BnaA01g10540D	1.111	1.022	1.35	0.835	1.517	0.77
BnaA06g02700D	19.439	16.937	23.532	13.493	16.677	14.91
BnaC06g41950D	1.954	3.118	1.258	2.799	2.493	7.437
BnaA08g24780D	3.349	0.965	4.426	1.226	2.191	1.822
BnaA03g38950D	31.695	40.863	34.559	82.01	148.608	160.553
BnaC06g28720D	17126.7	13150.1	19191.7	10323	8661.21	1079.23
BnaA05g06140D	19.692	10.341	11.62	13.81	15.446	11.957
BnaC05g18760D	48.322	46.619	53.038	51.88	92.284	53.957
BnaA06g25270D	0	0.071	0	0	0	0
BnaC09g00360D	1.267	1.059	10.564	7.44	1.357	22.599
BnaAnng33490D	0	0.078	0.069	0.572	0	0
BnaC08g42480D	6.003	6.683	5.141	7.453	13.894	6.266
BnaA10g15060D	13.606	12.568	16.334	12.085	16.968	16.42
BnaC06g17920D	6.243	4.511	2.34	2.794	17.806	7.054
BnaA07g19610D	240.053	252.62	70.348	54.325	55.207	35.91
BnaCnng44560D	25.158	19.98	26.138	20.57	25.266	25.441
BnaA03g22310D	32.829	36.032	27.164	30.671	35.802	25.523
BnaA03g35800D	0	0	0	0	0	0
BnaC02g01100D	6.372	3.622	5.615	3.487	1.614	3.047
BnaA06g04600D	1.909	2.815	2.873	3.817	3.993	3.949
BnaC01g29760D	6.258	11.742	5.884	8.052	7.778	6.047
BnaA03g11940D	0	0	0	0	0	0
BnaA08g27710D	16.082	15.302	10.833	11.352	12.011	11.759
BnaC05g32210D	7.421	6.965	10.509	8.333	7.093	7.071
BnaC09g39500D	0	0.208	0	0	0	0
BnaC03g14700D	3.829	3.034	3.608	3.907	11.463	9.125
BnaA08g13200D	0	0	0	0	0	0
BnaC04g32240D	0.427	0.211	0	0	0	0.377
BnaC04g48360D	0.143	0.397	0.025	0.13	0	0
BnaC05g31770D	10.668	6.666	11.971	6.877	11.322	7.239
BnaC06g02860D	14.053	11.015	9.797	17.008	9.489	14.812
BnaA06g40320D	14.524	18.79	12.841	13.063	14.331	17.677
BnaA09g08190D	0.145	0	0.34	0	0	0.868
BnaC09g30620D	0.163	0.241	0.072	0.222	0.348	0
BnaC08g47830D	0	0	0.049	0	0	0
BnaA06g32930D	7.874	9.408	12.895	12.25	12.577	10.736
BnaA03g31820D	8.233	6.197	6.909	6.463	7.734	4.091
BnaC03g63830D	0.935	1.386	2.143	2.295	0	0
BnaC05g44610D	9.396	12.233	9.092	6.184	8.555	13.573
BnaUnng02050D	2.813	1.255	4.398	1.319	0.097	0
BnaC08g11970D	12.989	14.908	20.355	17.952	13.239	8.975
BnaA07g04020D	5.439	6.611	4.517	5.582	5.571	8.036
BnaCnng16740D	0	0	0	0	0	0
BnaA06g15170D	23.297	21.718	13.378	11.55	15.84	11.288
BnaC04g49500D	0	0	0	0	0	0
BnaA04g06400D	2.089	1.401	1.571	1.567	1.888	1.197
BnaA02g22140D	0.446	0.621	0.036	0.074	0.087	0
BnaC02g44250D	9.899	5.046	6.944	2.984	0.078	1.725
BnaC06g37290D	25.964	24.168	28.867	34.955	60.615	34.336
BnaA10g19300D	12.936	11.74	11.027	13.44	20.975	14.676
BnaA10g24400D	9.367	9.042	10.147	7.809	11.085	4.23
BnaA09g35940D	5.136	3.538	4.168	5.465	3.183	9.157
BnaA07g09980D	0	0	0	0	0	0
BnaAnng37860D	0.75	0.436	0.894	2.044	2.078	0.747
BnaA10g09540D	19.321	9.971	29.305	14.761	12.142	18.622
BnaC06g29900D	3.955	1.606	2.44	3.115	1.858	0.954
BnaA05g28410D	0.399	0.394	0.312	0.644	0.142	0
BnaA09g05950D	0	0	0.051	0	0.062	0
BnaA05g33910D	24.049	12.166	15.82	10.823	10.109	9.784
BnaC01g42720D	4.1	2.025	5.151	2.07	0.325	0.964
BnaA01g29040D	10.436	11.713	9.637	11.532	19.662	11.048
BnaA07g00440D	23.647	10.994	41.549	36.276	40.65	30.335
BnaAnng01630D	14.986	22.742	15.678	25.94	25.705	21.808
BnaC07g10260D	8.408	10.056	2.681	2.011	1.184	1.347
BnaC07g24440D	5.418	2.215	18.355	3.65	4.6	0.89
BnaA09g36720D	1.177	1.321	2.875	3.159	4.237	3.964
BnaA10g28220D	5.749	1.893	8.005	5.74	3.343	8.04
BnaA03g49910D	2.117	3.842	1.702	1.202	0.821	1.372
BnaC01g01100D	35.21	11.578	25.483	19.392	15.71	20.259
BnaC03g37860D	8.886	12.523	6.985	10.726	9.838	10.006
BnaA08g31200D	2.49	7.758	5.063	6.265	3.28	1.825
BnaC01g34610D	6.785	8.566	6.002	7.487	5.563	4.048
BnaC08g43040D	4.561	5.9	2.32	7.35	6.393	1.941
BnaA05g16960D	0.064	0.063	0	0	0	0
BnaA02g05760D	5.328	3.316	3.068	2.097	1.841	2.176
BnaC08g04780D	0	0	0	0	0	0
BnaA01g27550D	7.813	4.871	5.487	8.252	5.617	7.081
BnaA03g28450D	6.997	8.38	7.061	8.774	5.9	5.587
BnaA03g53040D	0	0	0	0	0	0
BnaC08g20820D	9.659	7.803	4.195	4.851	9.191	8.885
BnaC03g36530D	34.267	46.181	33.431	46.746	50.725	55.727
BnaA04g00580D	0	0	0	0.059	0	0.241
BnaA04g15540D	16.924	18.101	24.709	21.669	26.95	20.581
BnaCnng45890D	0.138	0.455	0.041	0	0	0
BnaC06g32210D	0	0	0.388	0.267	0.157	0
BnaC03g13060D	21.225	16.072	12.286	13.656	7.629	10.825
BnaCnng63580D	5.479	1.444	7.832	0.111	0.391	0
BnaA01g14870D	12.316	6.021	10.293	9.653	2.311	9.051
BnaA03g27020D	1.423	2.199	3.826	2.653	1.758	1.854
BnaA10g26850D	12.691	14.462	24.972	24.197	12.502	29.344
BnaC02g19770D	1.853	1.466	1.245	1.457	0.941	1.257
BnaC01g29280D	5.041	1.195	4.797	0.55	0	0.854
BnaCnng76270D	12.39	8.449	11.866	6.547	4.325	7.984
BnaC08g45260D	3.842	3.795	3.296	4.134	3.138	2.248
BnaC03g58870D	5.312	5.01	4.184	11.41	30.589	26.501
BnaA07g17010D	1.946	0.113	1.412	0.52	1.103	0.606
BnaC07g33200D	4.022	1.842	8.385	8.914	3.361	18.59
BnaC02g02120D	16.986	7.657	22.731	10.515	0.114	9.666
BnaA03g43390D	18.435	27.295	32.181	28.131	61.013	50.08
BnaA03g31600D	13.496	6.009	14.512	3.631	1.901	2.35
BnaC04g30430D	6.632	8.121	1.728	1.698	5.4	2.373
BnaA07g25880D	1.059	0.291	0.674	1.229	16.937	4.545
BnaC07g07920D	5.767	6.538	4.894	5.047	5.399	6.015
BnaC07g41460D	19.971	7.961	18.599	6.738	5.609	5.652
BnaA05g04530D	0	0	0	0	0	0
BnaC03g24420D	7.988	4.6	12.387	5.475	2.981	2.561
BnaA10g02310D	0	0	0	0	0	0
BnaAnng21600D	0.329	0.488	0.145	0.299	0	0
BnaA05g33690D	1.157	2.001	0.382	0	0.31	3.369
BnaA05g19240D	11.097	11.25	7.065	11.667	7.961	10.087
BnaC01g31710D	53.842	67.538	60.158	68.245	77.806	51.785
BnaA06g38950D	17.573	21.45	11.148	6.813	187.359	83.424
BnaC02g21160D	0	0	0	0	0	0
BnaCnng22520D	0.272	1.614	0.959	0.371	0	1.153
BnaC03g17440D	7.168	7.83	8.883	8.791	10.98	16.102
BnaA04g18270D	0	0	0	0	0	0
BnaC09g40110D	0.071	0.07	0.187	0.064	0	0.375
BnaCnng15830D	3.042	8.817	0.536	0.461	0	0.25
BnaA09g31650D	0	0	0	0	0	0
BnaC08g39480D	0.653	2.007	0.352	1.352	1.864	2.497
BnaC07g13600D	14.587	17.327	15.974	13.945	19.046	9.284
BnaC04g56400D	0.545	0.692	0.274	0.495	0.667	0.989
BnaA08g11860D	12.599	14.281	2.61	6.029	0.592	18.397
BnaC02g33270D	2.868	2.461	11.704	1.577	1.616	1.918
BnaCnng25790D	9.956	11.506	6.654	8.381	6.917	6.682
BnaA03g49480D	8.016	12.945	9.44	4.342	11.221	6.283
BnaC09g50990D	5.046	5.363	0.067	0.834	0.737	0
BnaA08g01350D	13.775	11.121	12.228	8.501	5.282	3.21
BnaA01g09250D	6.383	4.774	7.632	6.545	4.392	5.792
BnaA02g20730D	0	0	0	0	0	0
BnaC02g45100D	40.459	30.924	43.036	30.762	35.459	30.002
BnaA05g07490D	14.131	19.465	53.037	27.039	18.618	34.954
BnaC09g38020D	2.397	3.998	2.493	3.249	1.556	1.955
BnaA01g18920D	20.5	20.538	25.78	25.537	35.442	23.129
BnaA02g31930D	0	0	0	0	0	0
BnaC08g27680D	28.958	22.894	24.054	24.204	23.151	24.572
BnaA05g12250D	37.059	41.465	20.435	42.622	37.949	30.925
BnaA09g53540D	9.149	8.463	4.599	5.536	6.967	6.163
BnaAnng28220D	19.433	22.647	15.096	19.316	17.279	10.16
BnaA07g22530D	38.975	62.355	38.562	27.408	26.34	31.235
BnaC04g02520D	0.172	0.113	0.86	1.408	0.676	5.833
BnaA02g32950D	0	0	0	0.166	0.587	0
BnaA10g16890D	0.864	1.352	0.333	0.622	0.655	0.686
BnaC04g17100D	0.863	0.39	0.239	0.471	0.607	0.078
BnaCnng16210D	26.415	21.996	36.491	32.318	43.829	38.351
BnaC09g50830D	0.26	0.963	0.344	0.886	0.557	0.963
BnaC03g70840D	1.812	1.893	1.597	1.741	2.328	1.261
BnaC01g43160D	0	0	0	0	0	0
BnaA04g20590D	0	0	0	0	0	0
BnaA03g18600D	1.512	6.574	2.239	1.704	1.619	0.897
BnaA03g06510D	0	0	0	0	0	0
BnaA09g03030D	1.147	1.545	0.184	0.095	0.112	0
BnaCnng59880D	1.574	1.815	12.138	1.073	2.668	1.389
BnaC01g28170D	16.717	16.652	32.491	27.381	15.318	31.099
BnaC09g42780D	2.845	3.884	2.408	1.667	1.122	0.872
BnaC07g36880D	3.42	2.059	0.683	1.093	0.915	2.63
BnaC04g46800D	4.433	5.507	2.249	4.882	6.111	10.167
BnaA03g34680D	178.842	124.244	113.612	73.8	47.181	13.757
BnaCnng41710D	30.454	22.25	10.364	19.388	31.039	7.915
BnaA08g05370D	1.455	1.402	2.18	0.86	0.857	0.077
BnaA09g32270D	17.564	9.219	25.149	7.045	44.141	17.795
BnaCnng29920D	1.019	3.111	0.898	3.282	3.619	7.305
BnaA08g27220D	118.681	106.05	137.87	118.365	129.887	141.133
BnaA06g30140D	2.066	4.337	0.683	1.995	1.797	1.321
BnaA05g01520D	2.079	2.465	1.018	4.66	5.687	8.167
BnaA10g08890D	14.4	22.861	21.841	19.725	24.924	17.368
BnaA06g10480D	0.061	0	0	0.056	0	0
BnaCnng30730D	27.84	30.814	60.408	23.404	37.612	20.647
BnaA01g20950D	130.704	104.528	50.397	49.207	36.201	10.591
BnaA01g27170D	4.061	4.306	2.182	4.231	6.15	3.356
BnaC02g17180D	0	0.299	0	0	0	0
BnaC06g31740D	2.324	3.329	4.71	4.963	4.354	5.905
BnaA01g29380D	0	0.135	0	0	0	0
BnaC02g02650D	25.691	17.018	14.097	12.115	15.405	20.297
BnaC08g14110D	15.369	23.5	23.205	20.352	38.774	25.182
BnaA01g12350D	0	0	0	0.1	0	0
BnaA05g01460D	0	0	0	0	0	0
BnaC03g19290D	0	0	0	0	0	0
BnaAnng29850D	8.028	10.006	7.338	9.34	15.42	7.466
BnaA07g32420D	123.595	265.191	156.876	575.563	925.854	1780.69
BnaC05g24710D	0.198	0.587	0.174	0.36	0.565	0.489
BnaA05g29530D	35.93	55.845	30.87	31.124	61.229	15.049
BnaC01g31110D	1.784	1.669	0.496	2.133	2.311	0.596
BnaA01g32110D	15.142	7.947	14.024	22.007	11.742	23.681
BnaC02g44080D	0	0	0	0	0	0
BnaC09g50550D	15.338	11.735	14.47	11.732	12.826	8.365
BnaA05g28900D	12.537	4.192	13.735	5.415	5.818	0.252
BnaC06g08160D	6.358	5.432	4.152	4.52	4.604	2.415
BnaA08g06380D	4.74	4.452	2.693	3.813	3.244	2.934
BnaC06g26110D	0.382	0.189	0.673	0.116	0	0
BnaC05g40890D	0	0	0	0	0	0
BnaCnng15070D	5.306	3.495	4.519	3.857	3.976	7.676
BnaC09g09000D	12.143	16.623	0.322	14.757	22.24	18.432
BnaC09g47890D	52.36	65.684	98.278	89.403	160.938	62.821
BnaAnng39100D	0	0	0	0	0	0
BnaC02g45200D	1.582	2.501	1.338	0.834	0.135	0.837
BnaC05g04300D	1.548	1.568	5.314	2.38	3.101	3.403
BnaA06g03420D	36.52	36.08	26.22	41.512	25.082	43.05
BnaC03g71530D	90.267	98.947	184.701	234.878	128.38	253.313
BnaA06g02300D	1.281	1.094	1.952	0.503	0.185	0.733
BnaCnng24550D	0	0	0	0	0	0
BnaA08g13730D	0.12	0.059	0.158	4.788	1.602	10.016
BnaA06g26760D	17.695	27.355	15.094	18.614	21.039	19.717
BnaA10g26880D	18.428	9.931	15.745	29.381	17.754	25.302
BnaA09g18270D	0	0	0	0	0	0
BnaA06g13230D	2.597	2.035	1.394	1.546	0.607	1.864
BnaC02g04160D	5.991	2.978	3.187	2.671	0	4.707
BnaCnng16630D	3.759	3.623	1.567	3.366	1.727	1.495
BnaC09g41500D	5.157	6.027	6.151	6.572	4.107	4.661
BnaUnng02880D	1.955	5.225	6.281	2.821	3.692	5.234
BnaA06g35610D	0.073	0.435	0.129	0.133	0	0
BnaA02g05340D	15.673	49.432	18.019	39.602	75.004	66.988
BnaC08g20530D	1.536	0.16	1.14	1.396	0.433	0
BnaC08g12680D	0.813	2.237	0.358	1.108	1.367	0.184
BnaC04g44820D	50.296	43.515	48.361	38.87	43.648	39.185
BnaC06g02580D	1.635	1.475	0.078	0.565	0.19	0.395
BnaC04g00100D	0	0	0.075	0	0	0
BnaA03g19440D	3.212	3.432	2.079	2.978	2.105	2.22
BnaCnng06260D	2.769	2.706	2.519	2.625	2.901	4.066
BnaCnng10030D	0	0	0	0	0	0
BnaA03g03560D	20.301	21.363	17.613	22.335	24.396	30.385
BnaC02g03240D	45.615	26.672	53.457	36.48	0	40.215
BnaA06g17880D	4.37	3.937	3.511	5.295	3.348	2.948
BnaA08g08470D	0	0	0.032	0	0	0
BnaCnng12760D	0.711	0.319	1.253	0.587	0.484	0
BnaA09g43010D	7.91	8.289	15.735	9.802	14.754	4.441
BnaA02g02830D	2.521	9.013	2.644	0.764	0	0
BnaC04g36720D	63.417	88.397	64.9	121.99	117.114	69.351
BnaA10g18200D	0	0	0	0	0	0
BnaC01g22060D	23.026	20.693	10.787	16.447	20.835	12.378
BnaC08g04700D	6.306	8.703	7.435	8.679	4.963	11.682
BnaC06g42490D	0	0	0	0	0	0
BnaC02g30800D	0	0	0	0	0	0
BnaA03g37140D	19.62	22.188	27.145	19.801	25.919	26.604
BnaC03g25540D	15.826	15.071	12.309	14.078	16.177	11.64
BnaC04g51940D	16.43	19.434	22.897	44.484	23.57	18.222
BnaA03g35930D	5.271	14.162	1.759	4.681	4.83	2.874
BnaC04g49900D	0.049	0	0.215	0.044	0.209	0
BnaCnng58040D	5.341	3.837	3.422	3.529	3.638	0
BnaC04g21650D	0	0	0	0.043	0	0
BnaA07g37860D	0.237	0.375	0.502	0	1.777	1.406
BnaC07g43360D	0.032	0.062	0.223	0.086	0.068	0.1
BnaA02g09650D	44.607	42.197	38.678	47.469	46.432	41.352
BnaA07g22760D	21.164	11.767	20.424	14.153	10.494	25.896
BnaC05g37490D	44.963	47.488	51.69	27.72	76.656	18.191
BnaC09g24080D	0	0	0	0	0	0
BnaC07g27800D	0.434	0.214	2.199	1.611	1.239	1.494
BnaA01g10730D	4.744	4.318	3.335	3.342	4.508	3.104
BnaC09g53250D	0.456	0.57	0.428	0.552	0.163	0.868
BnaC03g37060D	27.863	31.362	33.319	17.542	5.539	7.374
BnaA01g22770D	10.927	12.088	15.105	17.123	13.518	13.438
BnaC03g46270D	0	0	0	0	0	0
BnaC08g30810D	0.262	0.086	0.154	1.111	0.748	0
BnaAnng38870D	0.677	0	1.64	0	0	0
BnaC04g15710D	0	0	0	0	0	0
BnaA05g32110D	0	0	0	0	0	0
BnaA07g08140D	1.534	1.282	4.991	0.107	0.884	3.498
BnaC01g27600D	7.025	8.965	7.48	10.799	18.049	12.83
BnaA06g18290D	14.907	6.976	15.103	7.678	8.076	4.281
BnaA01g27720D	5.075	4.987	3.703	4.851	4.782	7.779
BnaC07g42690D	22.202	26.869	35.212	29.589	36.838	38.291
BnaA08g29550D	5.632	4.728	4.59	4.656	3.128	5.694
BnaAnng30990D	37.818	32.703	16.735	14.58	20.648	13.91
BnaC03g69620D	3.292	1.594	2.275	3.284	2.004	2.118
BnaC04g43910D	34.292	64.383	34.211	46.459	54.865	39
BnaCnng68550D	0.098	0.193	0.602	1.596	1.149	0.103
BnaA08g27830D	3.952	4.742	4.395	6.242	7.455	3.586
BnaA01g11220D	0.769	0.253	0.427	0.44	0.915	0.06
BnaA04g15880D	7.974	9.941	16.226	13.111	15.852	8.743
BnaC02g47820D	5.248	3.23	1.44	0.391	0	0.091
BnaA01g05930D	0	0	0	0	0	0
BnaA04g04900D	3.018	2.548	3.723	2.842	4.758	3.195
BnaC05g33320D	5.485	4.954	5.91	4.386	4.261	5.143
BnaA01g27690D	3.061	1.843	3.455	2.303	2.56	2.531
BnaA01g30370D	5.307	2.065	9.588	0.877	5.451	0.34
BnaC03g50030D	24.527	30.527	58.901	55.063	26.513	37.548
BnaCnng15230D	44.954	15.162	87.001	10.064	7.129	6.131
BnaC09g37940D	100.852	51.038	134.6	74.257	69.375	54.56
BnaA06g35950D	1.568	1.302	1.603	1.026	1.679	4.583
BnaC05g09100D	1.665	4.043	0.545	1.384	0.357	0
BnaC09g22280D	155.378	235.604	191.513	81.638	43.728	82.178
BnaC05g29270D	0.056	0.056	0.05	0.307	0.543	0
BnaA06g13630D	6.853	7.002	3.681	6.995	6.08	5.963
BnaA04g06570D	77.172	81.257	75.806	41.2	22.656	28.599
BnaC05g51730D	4.354	7.309	3.135	4.723	1.855	5.552
BnaA03g15850D	0	0	0	0	0	0
BnaA09g17390D	15.256	17.453	6.698	15.403	12.957	13.487
BnaC07g23300D	2.295	3.158	2.455	2.458	2.632	2.777
BnaA09g16770D	4.512	3.608	5.338	3.924	3.289	4.367
BnaA07g26880D	8.595	8.643	16.498	10.785	7.338	13.215
BnaCnng00700D	14.827	19.166	16.172	21.07	21.746	22.75
BnaA09g40910D	0.636	0.275	0.28	1.48	1.573	0.294
BnaA02g10850D	68.169	34.608	64.756	31.004	37.424	31.225
BnaA10g22490D	0	0	0	0	0.524	0
BnaA02g01170D	2.693	1.583	1.073	0	0	0
BnaA09g47750D	53.466	67.95	16.305	9.843	2.174	6.809
BnaUnng04030D	1.026	0.596	0.16	0.494	0	0.831
BnaC05g42830D	4.353	2.382	4.194	2.134	4.593	3.415
BnaA05g14430D	0.832	2.82	2.2	4.214	3.692	4.406
BnaC02g44270D	3.319	0.805	0.154	0.37	0.623	0.37
BnaC07g22260D	0.479	0.998	0.422	0.967	0.456	0
BnaCnng27790D	5.71	4.146	7.638	4.063	4.787	6.555
BnaC03g14050D	0.234	0.116	0.413	0.958	0.627	3.595
BnaA08g24040D	16.048	13.269	32.429	34.157	23.434	38.594
BnaC08g21470D	0.047	0.047	0	0	0	0
BnaA05g29840D	2.783	2.855	2.428	2.237	2.75	1.558
BnaA08g15730D	2.083	2.664	0.929	1.604	1.417	3.036
BnaA07g18160D	5.727	6.133	6.233	5.86	7.212	7.947
BnaA08g03620D	2.245	2.884	2.918	4.642	1.863	3.09
BnaC07g30750D	6.634	7.197	8.864	7.328	6.637	8.4
BnaC04g03930D	21.873	12.664	17.561	29.569	19.448	23.693
BnaC02g39500D	21.42	17.445	38.258	39.543	25.616	61.595
BnaA10g13650D	0.872	0.79	0	0.066	0.233	0
BnaA09g54560D	48.172	37.245	46.719	30.751	32.628	26.374
BnaA02g00430D	22.593	35.506	19.863	31.749	32.051	29.738
BnaC06g29540D	0.1	0.296	0	0	0	0
BnaC03g68880D	1.351	3.923	2.561	0.93	0.438	0
BnaC02g40230D	3.1	2.112	3.391	2.332	8.24	3.961
BnaC06g10300D	4.335	5.737	9.729	9.439	13.921	14.979
BnaC06g07540D	3.936	5.365	3.336	6.293	3.093	6.013
BnaA04g15080D	23.598	29.557	23.577	25.391	41.434	32.195
BnaA10g21400D	4.997	1.312	4.961	6.898	4.74	3.549
BnaCnng05410D	0.176	0.116	0.103	0.159	0	0
BnaCnng17430D	0	0	0	0	0	0
BnaA06g20140D	39.897	12.512	27.452	12.319	16.04	11.519
BnaC08g26190D	12.148	10.444	14.462	13.145	21.641	19.929
BnaC03g76740D	0	0	0	0	0	0
BnaA09g26320D	2.207	0.872	1.867	1.484	2.126	1.308
BnaC08g42950D	3.068	5.684	5.829	7.841	5.029	1.218
BnaC02g41100D	6.975	5.25	2.927	1.509	0.178	1.055
BnaCnng51640D	19.859	22.292	15.86	30.563	65.496	37.217
BnaA07g24890D	1.797	1.168	0.333	0.129	0.101	0.25
BnaA08g18000D	7.783	3.763	6.031	9.179	4.963	10.401
BnaC08g47390D	0.216	0.142	0.508	0.524	1.312	0
BnaA08g21370D	1.402	1.072	2.032	0.863	0.871	0.383
BnaC05g36990D	0.763	1.741	1.138	0.427	0.377	0
BnaA10g18340D	5.452	4.713	5.089	8.899	4.07	8.886
BnaC08g06490D	0	0	0	0	0	0
BnaA10g24450D	0	0	0	0	0	0
BnaA05g19400D	5.601	2.248	19.586	4.135	10.867	2.038
BnaC03g77610D	0	0	0	0	0	0
BnaA09g32260D	72.873	76.998	60.411	71.255	192.936	119.957
BnaUnng00940D	39.099	33.841	39.365	42.542	39.623	34.354
BnaC05g38280D	15.64	21.438	7.156	22.763	20.285	28.476
BnaC08g40060D	6.801	6.202	4.103	3.423	3.92	4.265
BnaAnng17930D	2.994	3.32	3.683	3.413	3.567	3.02
BnaA03g13630D	0.319	0.079	0	0.218	0	0
BnaC03g44040D	6.116	6.674	11.502	12.194	12.118	14.303
BnaA10g16510D	5.619	4.818	4.577	3.95	4.937	1.066
BnaC09g07320D	38.929	23.215	0.117	10.297	9.063	0
BnaC08g05880D	5.762	7.471	6.981	7.308	9.766	5.846
BnaC05g07630D	0.496	0.452	0.235	0.485	0.286	0
BnaA03g22590D	0.719	0.812	0.679	0.327	0.11	1.196
BnaC09g00160D	1.441	0.316	43.177	16.298	0.171	35.601
BnaA10g18690D	2.711	2.993	0	1.884	22.363	10.467
BnaC03g41340D	3.372	2.487	3.055	4.229	3.101	2.866
BnaC05g01110D	1.143	2.4	0.944	0.325	0.841	2.344
BnaA02g23880D	64.367	41.852	97.582	37.895	17.773	21.9
BnaA08g05220D	5.082	6.188	3.957	6.157	6.621	3.42
BnaA06g20780D	26.677	36.682	19.999	28.573	35.486	27.501
BnaA03g02670D	14.473	10.804	14.075	19.581	9.87	13.62
BnaAnng40950D	0	0	0	0	0	0
BnaA05g36080D	43.724	51.245	48.56	54.461	56.95	67.32
BnaC09g09860D	0.142	0.281	0	0.258	0.152	0
BnaC01g18550D	0.953	1.151	1.586	1.635	2.607	1.905
BnaC04g01670D	0.105	0	0	0	0.225	2.671
BnaA03g23410D	9.111	6.55	6.639	7.584	7.371	8.32
BnaC01g17470D	0	0	0	0	0	0
BnaCnng22350D	2.714	1.656	0.422	1.451	0.684	0.676
BnaA09g36740D	8.223	4.381	4.006	4.131	1.893	1.545
BnaA10g14750D	0	0	0	0	0	0
BnaA01g12560D	0.848	0.882	1.259	1.258	2.151	1.324
BnaA09g51870D	9.767	11.579	3.595	9.033	16.357	3.814
BnaC07g04010D	0.637	0.094	0.814	0.058	0.068	0
BnaCnng36700D	2.568	3.755	3.078	1.027	0.55	0.544
BnaA07g09860D	0	0	0	0	0	0
BnaAnng41010D	6.027	7.498	7.867	4.158	10.275	7.089
BnaCnng02210D	0.911	0.6	13.7	6.678	0.455	16.461
BnaA10g18700D	4.402	6.166	2.749	4.304	54.876	38.46
BnaA09g08790D	0.519	0.513	0.065	0.337	0.159	8.007
BnaC09g21810D	180.636	225.501	84.002	137.076	152.912	119.123
BnaC04g15740D	3.536	4.076	5.453	3.838	3.786	4.784
BnaC04g00180D	7.246	10.876	20.628	17.095	11.636	12.245
BnaA01g02710D	1.809	1.668	2.072	2.082	1.097	4.086
BnaA08g16920D	12.089	8.57	13.173	26.918	23.018	51.583
BnaA06g15380D	3.514	5.091	1.94	2.81	1.003	1.091
BnaA06g39970D	0	0	0	0	0	0
BnaA09g32740D	0	0	0.053	0	0	0
BnaA09g22150D	0	0	0	0	0	0
BnaC08g39340D	0.159	0.079	0.21	0.867	0.34	0.673
BnaC08g07860D	24.851	34.538	51.896	29.281	44.338	42.4
BnaC02g22410D	14.177	28.418	7.422	6.161	8.578	5.873
BnaA06g16590D	0	0	0	0	0	0
BnaC03g29360D	24.592	40.073	9.474	8.9	3.305	1.465
BnaA03g26010D	2.34	0.73	2.821	1.007	1.846	3.129
BnaCnng37520D	3.001	5.09	2.644	3.863	68.481	21.974
BnaA07g32810D	28.449	27.413	34.154	39.302	61.809	40.292
BnaAnng08930D	41.209	47.436	30.517	9.657	10.231	9.47
BnaA03g21790D	0.646	1.149	0.854	0.587	0.761	0.547
BnaA05g09570D	19.478	18.774	21.424	25.783	18.446	24.369
BnaC05g16370D	3.687	3.643	9.247	4.832	6.148	6.456
BnaC07g18090D	2.315	1.341	2.18	0.218	0.427	0
BnaA10g16410D	4.467	3.624	1.123	2.413	1.742	2.567
BnaA04g25260D	28.099	27.761	38.301	30.753	39.387	39.608
BnaAnng38230D	2.605	2.573	2.142	0.631	2.602	3.493
BnaC03g43310D	0	0	0.131	0	0.079	0
BnaCnng14620D	80.092	76.1	67.357	99.756	84.019	44.865
BnaC03g68430D	90.481	80.051	78.944	19.33	26.172	45.118
BnaA05g19910D	1.977	3.635	3.194	3.294	2.234	4.419
BnaC03g66080D	4.262	5.56	3.322	4.518	8.306	10.123
BnaC08g41380D	15.905	10.674	17.716	8.999	7.603	4.236
BnaA10g17040D	39.589	13.633	40.936	21.847	22.512	16.203
BnaC09g05920D	10.043	5.507	0.044	4.015	3.387	0
BnaA06g36820D	0	0	0	0	0	0
BnaC05g36370D	0	0	0	0	0	0
BnaA09g08810D	7.133	2.505	11.169	2.655	3.358	26.565
BnaC07g12330D	86.691	90.116	81.217	102.154	96.421	107.788
BnaCnng65160D	7.635	6.068	3.082	3.799	2.237	3.838
BnaA09g16640D	1.963	0.84	4.093	0.654	0.56	0.762
BnaA05g01630D	28.808	26.692	30.735	30.069	23.838	36.35
BnaA03g33990D	4.214	6.843	1.944	8.348	6.427	6.433
BnaC04g44840D	0.647	1.004	0.855	0.798	0	2.201
BnaC04g32090D	335.393	218.808	342.165	233.463	224.672	203.671
BnaA04g03030D	5.229	10.207	4.385	4.866	7.351	4.468
BnaC05g13270D	0.05	0.345	0.132	0.091	0	0
BnaC06g22080D	30.76	39.49	19.074	40.567	42.367	38.937
BnaC05g20060D	0	0	0	0	0	0
BnaA08g03500D	18.341	20.634	46.146	29.286	35.976	32.323
BnaA07g23190D	0	0	0	0	0	0
BnaA02g10660D	19.789	14.98	16.589	17.608	17.261	15.858
BnaA06g15690D	6.155	5.905	6.049	7.475	6.969	2.945
BnaA08g06870D	11.546	12.16	6.262	6.988	6.336	7.263
BnaCnng74230D	0	0	0	0	0	0
BnaC03g23930D	7.285	8.222	4.709	6.885	6.745	5.292
BnaA03g38560D	1.722	0	0.08	0.659	2.232	0
BnaA10g19530D	9.197	5.726	16.985	9.96	13.218	17.073
BnaCnng69360D	12.965	13.134	14.361	21.617	17.404	19.825
BnaA03g15510D	2.504	2.046	1.994	0.875	0.979	0.255
BnaA05g33890D	77.603	128.159	177.823	186.933	296.287	200.039
BnaC07g18630D	10.693	5.659	9.422	8.051	17.661	10.754
BnaA09g29750D	20.54	27.824	8.203	9.835	13.392	7.577
BnaA05g28180D	7.519	10.307	10.683	11.018	9.206	5.323
BnaCnng41870D	65.367	53.799	44.363	24.79	26.833	26.193
BnaA01g09130D	1.945	1.552	0.791	0.748	0.721	0.396
BnaC07g50410D	3.578	2.991	1.026	1.52	2.244	1.592
BnaC04g06220D	12.69	8.507	7.397	6.497	7.103	7.956
BnaC01g06190D	1.778	1.548	0.598	1.105	0.501	0.891
BnaCnng53020D	15.933	12.967	18.786	15.52	16.074	18.809
BnaC05g46680D	1.538	2.568	2.103	5.254	1.76	2.527
BnaA09g55740D	12.799	3.318	12.785	1.612	1.153	2.147
BnaC08g42400D	6.521	9.898	5.551	10.693	13.724	29.499
BnaC05g44940D	7.173	5.388	8.138	8.46	6.285	10.636
BnaA08g24710D	2.302	1.462	0.966	0.249	0	0.696
BnaC03g68540D	6.716	7.741	7.092	8.525	8.73	12.528
BnaA03g24560D	6.479	5.101	3.033	8.095	4.66	6.001
BnaC09g45810D	13.811	16.072	13.251	17.316	27.685	26.395
BnaC04g14730D	1.575	1.556	0.093	2.099	1.349	1.667
BnaAnng11780D	20.733	19.362	19.177	5.436	9.386	6.879
BnaA10g24380D	12.817	8.585	11.363	6.743	7.773	6.175
BnaA03g47610D	18.379	19.078	21.269	20.857	23.573	44.383
BnaA09g29110D	18.003	25.733	40.67	53.95	49.82	67.314
BnaA06g35350D	0	0	0	0	0	0
BnaC03g67470D	8.024	7.361	15.907	12.325	14.111	9.202
BnaC03g74050D	11.945	28.531	6.213	68.742	47.141	18.435
BnaA10g05000D	4.269	2.033	3.828	0.693	1.387	0.161
BnaCnng15740D	0	0	0	0	0	0
BnaA09g35440D	2.811	3.534	5.853	1.47	1.185	1.172
BnaA10g10890D	1.097	1.084	0.483	2.741	2.862	3.048
BnaC05g08300D	4.209	2.893	3.386	4.407	2.449	5.619
BnaC05g49800D	0	0	0	0	0	0
BnaA10g12430D	0	0.29	0.194	0.266	0.078	0
BnaA03g22060D	22.79	31.588	47.765	32.974	30.437	41.929
BnaA04g13340D	14.262	5.254	12.07	11.276	3.709	8.445
BnaA02g06860D	55.485	15.135	69.408	28.064	33.721	16.957
BnaAnng14730D	0.222	0.164	0.39	0.277	0.178	0.411
BnaA05g17260D	28.61	31.792	33.139	22.891	21.261	19.695
BnaCnng03480D	5.322	13.23	18.304	21.372	20.767	49.617
BnaA06g09560D	0	0	0	0	0	0
BnaC06g12780D	0	0	0	0	0	0
BnaC07g06490D	1.149	2.176	4.388	2.175	3.28	2.737
BnaCnng37240D	5.061	5.751	2.453	4.507	4.145	2.679
BnaC01g38920D	0	0	0	0	0	0
BnaC07g48950D	186.071	82.635	202.446	76.546	109.358	76.512
BnaA04g14560D	0	0	0	0.198	0	0.925
BnaA08g13860D	31.644	30.24	41.497	1.68	0.871	3.757
BnaC05g38350D	0.204	0	0	1.393	0.219	1.082
BnaC08g06020D	82.9	59.185	69.782	62.091	72.232	51.658
BnaA01g28530D	42.099	45.842	45.231	60.04	42.181	94.904
BnaA07g02200D	0.099	0	0	0	0.106	0
BnaCnng21890D	2.956	2.855	1.81	2.132	2.369	1.403
BnaC07g18440D	18.575	17.268	21.724	20.26	13.801	9.322
BnaC04g17930D	4.271	4.503	3.486	4.507	3.529	5.432
BnaC03g11340D	0.576	0.071	0.317	0.131	0	0
BnaC08g11390D	1.601	0.859	0.564	0.333	0.245	0.387
BnaC05g16670D	3.13	4.987	2.802	4.22	3.621	6.253
BnaC03g14910D	87.87	91.195	73.841	55.392	59.201	48.723
BnaC09g17820D	0.073	0	2.115	0	0	0
BnaC06g24820D	35.044	12.921	22.525	9	11.78	11.291
BnaAnng11120D	2.605	1.068	4.633	3.975	2.578	1.301
BnaC05g23800D	0	1.018	0	0	0	0
BnaC03g56410D	5.965	5.446	6.587	5.146	10.023	6.835
BnaCnng19100D	2.867	3.777	11.496	8.077	4.451	24.639
BnaC08g09750D	1.514	2.909	5.263	5.734	2.432	2.939
BnaC06g10620D	6.232	6.631	5.576	6.273	6.877	6.09
BnaCnng13320D	2.242	1.962	3.33	2.852	1.371	5.154
BnaA05g12950D	5.325	2.059	4.437	31.451	22.615	52.02
BnaAnng03090D	13.61	18.4	27.697	17.613	23.14	20.787
BnaA04g16680D	0.342	0.084	0	0.078	0.274	1.447
BnaA10g16140D	8.801	10.283	9.778	20.446	14.255	32.813
BnaA10g01680D	2.002	1.483	1.176	0.606	1.518	0
BnaA09g30470D	6.248	7.726	5.399	5.494	3.927	6.572
BnaC03g23500D	4.899	4.87	2.796	3.948	4.848	3.457
BnaC08g02000D	1.362	0.953	0.85	0.155	0.486	0.3
BnaC09g33940D	16.829	17.115	21.734	14.318	32.586	16.157
BnaAnng17910D	13.139	17.808	16.935	54.169	159.943	339.567
BnaC01g38680D	0.065	0	0	0.059	0.557	0.826
BnaA09g43480D	61.003	61.861	92.074	88.311	79.351	135.274
BnaC03g64400D	22.776	35.567	42.969	38.472	33.918	39.57
BnaC03g20730D	0	0	0	0	0	0
BnaA07g21560D	2.451	3.995	3.995	1.503	4.132	3.568
BnaC04g54510D	2.745	3.332	4.353	4.632	3.61	6.476
BnaAnng00460D	16.307	72.31	3.007	3.446	4.06	0
BnaA03g51000D	2.473	3.776	2.179	5.925	5.215	8.411
BnaC01g29520D	1356.94	1233.33	1832.43	520.852	474.763	373.199
BnaA08g06670D	28.4	29.305	27.518	21.334	23.221	18.491
BnaC03g77630D	0.8	3.953	0.529	0.545	2.142	0
BnaA09g07580D	0	0	0	0	0	0
BnaC01g23960D	9.175	5.578	5.479	10.536	9.534	12.738
BnaA05g12040D	0	0	0.123	0	0	0
BnaC05g18730D	23.108	16.467	22.845	16.79	19.239	17.868
BnaC03g06260D	0	0	0	0	0	0
BnaC05g46430D	1.673	0.789	1.507	0.864	1.547	1.207
BnaA01g30760D	1.488	1.96	0.83	1.712	0.796	1.208
BnaC02g46370D	2.252	2.91	2.748	3.936	3.153	0.734
BnaC05g30090D	13.894	13.155	25.165	11.223	12.808	14.505
BnaA03g40160D	68.469	50.205	44.17	49.336	44.705	37.537
BnaA04g00230D	10.121	7.232	8.984	7.466	7.036	6.247
BnaUnng03720D	42.781	46.208	73.671	57.696	60.699	54.996
BnaA02g27900D	6.755	1.744	9.469	5.441	1.479	0
BnaA04g12350D	318.096	470.13	206.497	312.694	159.667	216.192
BnaC02g01500D	0.439	0.289	1.074	0.62	0	0
BnaA01g23700D	48.549	45.797	58.435	38.069	50.352	65.726
BnaA10g10830D	23.131	22.063	30.203	39.497	28.012	34.089
BnaC09g09770D	0.297	0.783	0	0.54	0	0
BnaA03g18370D	20.278	19.602	44.669	37.781	34.748	36.834
BnaA01g14190D	8.397	11.76	6.98	13.649	5.097	13.106
BnaAnng00290D	1.904	12.137	10.121	0.502	0	0.13
BnaA08g22310D	4.449	4.282	3.669	3.783	2.87	3.532
BnaC08g24130D	3.477	5.681	1.767	0.851	0.143	0
BnaCnng31910D	13.469	10.382	15.911	29.522	23.133	27.891
BnaA01g28550D	9.959	9.082	6.328	8.789	5.741	8.313
BnaC04g25580D	4.941	4.02	1.902	1.999	2.178	2.373
BnaA03g06600D	5.104	3.79	2.792	3.274	4.071	2.543
BnaA06g27210D	3.187	2.272	1.798	2.398	1.82	1.409
BnaC06g41940D	0	0	0	0	0	0
BnaA09g27040D	13.741	16.229	3.044	18.066	124.576	62.411
BnaA10g08230D	3.789	4.227	1.86	2.963	2.583	2.953
BnaC01g00440D	1.303	1.521	1.148	2.207	1.078	2.508
BnaA05g23310D	0.107	0.053	0.141	0.243	0.286	0
BnaC09g26640D	3.848	3.881	4.425	2.687	2.471	2.401
BnaA05g31670D	40.806	35.3	71.727	71.995	48.117	61.838
BnaA04g03550D	3.666	5.645	1.9	4.311	8.772	4.337
BnaA09g56380D	2.884	1.731	2.248	1.451	1.092	1.362
BnaA09g30650D	0	0.119	0.053	0	0	0
BnaC03g31100D	4.078	3.094	1.909	1.919	1.988	1.735
BnaA09g34850D	0	0	0	0	0	0
BnaA06g04570D	0	0.046	0.041	0	0	0
BnaC09g20710D	14.916	15.244	11.149	30.006	22.244	17.642
BnaA09g14960D	7.235	7.148	6.663	6.193	10.044	9.438
BnaA10g16830D	0.209	1.032	0	0	0	0
BnaC08g50090D	0	0	0	0	0	0
BnaA03g55150D	12.922	23.19	10.017	18.654	12.082	7.446
BnaA01g18400D	7.194	4.442	11.606	13.411	6.625	4.984
BnaA03g52260D	8.631	12.028	14.97	18.245	14.102	16.255
BnaCnng71920D	0.865	0.534	1.048	0.786	1.505	1.03
BnaC02g45730D	17.802	18.248	33.788	22.318	23.641	34.078
BnaC03g04050D	0	0	0	0	0	0
BnaCnng27510D	0.512	1.697	1.095	0.897	0.665	2.089
BnaAnng07770D	20.316	19.216	28.101	20.25	12.392	18.924
BnaC09g35230D	9.71	5.844	18.684	18.052	19.235	13.823
BnaA05g14250D	4.523	7.724	4.428	6.394	5.858	8.631
BnaC06g12520D	12.667	19.048	8.395	29.642	33.719	17.682
BnaA03g20820D	25.33	22.115	51.593	33.616	50.321	45.275
BnaCnng65520D	11.979	18.469	14.194	6.932	9.044	8.61
BnaA03g54110D	8.078	6.361	8.937	3.67	2.178	1.64
BnaA08g30200D	7.393	8.689	4.455	6.834	8.96	3.464
BnaC08g08680D	0.54	0.4	0.475	4.046	3.899	0
BnaC03g20870D	6.193	3.154	3.572	4.003	1.367	5.035
BnaA02g13090D	9.02	13.555	40.97	12.237	17.816	25.016
BnaA05g22400D	0.64	1.264	1.753	0.614	0.266	0.715
BnaA03g52520D	5.278	7.237	4.425	4.418	3.698	6.163
BnaA03g30840D	1.881	2.616	1.903	1.013	1.939	1.106
BnaA09g13300D	1098.87	1097.01	559.206	2297.17	2246.32	1947.12
BnaC04g56060D	0.396	0.978	1.396	0.9	0	0
BnaC09g13680D	0.938	1.054	0.338	0.465	1.37	0.045
BnaC03g67790D	9.783	7.249	11.134	7.408	6.545	0.432
BnaA05g26640D	0	0	0.064	4.777	1.563	2.319
BnaCnng32370D	0.311	0	1.645	0	0	0
BnaC05g36190D	0.483	0	0	0	0	0
BnaA09g44850D	0.918	0.906	2.425	0.385	0	0
BnaA01g19410D	10.75	11.224	20.558	17.205	21.184	30.002
BnaC07g33350D	4.949	10.646	4.501	5.875	3.247	9.802
BnaCnng00150D	12.775	19.914	10.444	24.378	17.019	31.707
BnaAnng40160D	2.055	1.732	0.213	1.428	0.065	1.152
BnaC06g39250D	40.663	9.503	94.689	108.556	249.373	91.548
BnaA03g47560D	0.168	0.72	0	0	0.12	0
BnaA01g36950D	1.608	1.5	0.63	2.029	1.482	2.08
BnaC06g06480D	180.93	50.886	159.835	46.376	77.172	41.492
BnaA08g02020D	53.034	52.058	58.825	18.44	15.517	15.616
BnaC05g40920D	0	0	0.182	0.25	0	0
BnaA10g00640D	10.552	17.93	15.099	15.571	17.079	16.979
BnaCnng49840D	0	0	0	0	0.06	0
BnaA06g32010D	3.287	2.279	4.826	6.34	3.426	6.745
BnaC09g19920D	71.412	67.98	51.868	50.336	42.404	38.51
BnaA09g35300D	0	0	0	0.201	0.178	0
BnaA02g10840D	0	0	0	0	0	0
BnaC07g19930D	3.545	3.713	2.999	4.188	4.858	1.952
BnaC01g13110D	13.304	7.157	7.507	7.328	6.487	9.261
BnaA05g21670D	22.211	29.672	20.678	27.376	4.885	9.81
BnaA09g04300D	0	0	0	0	0	0
BnaC08g47240D	28.474	39.023	50.957	46.552	53.074	46.87
BnaC04g31270D	0.105	0	0	0	0	0
BnaA06g30580D	3.089	3.862	3.667	3.38	1.012	1.268
BnaC08g21320D	9.209	10.096	6.073	8.152	66.017	55.789
BnaA02g04850D	5.112	3.65	1.54	2.128	1.201	1.886
BnaA10g27560D	6.719	7.804	3.88	7.549	4.325	6.296
BnaC07g13080D	0	0	0	0	0	0
BnaC03g66380D	3.209	5.993	0.232	0.959	0	1.163
BnaA09g29970D	44.476	47.051	87.394	102.766	55.195	119.03
BnaC03g15470D	22.279	10.612	16.405	7.881	12.691	17.773
BnaA06g10000D	0.704	0.766	0.248	0.512	0.226	1.715
BnaC08g29890D	3.194	5.154	10.694	6.578	7.18	9.693
BnaA02g04770D	0.761	0.677	0.134	0.208	0.978	0
BnaA05g15910D	10.166	9.983	6.267	9.108	8.25	6.358
BnaA04g13120D	0	1.016	0	0.203	0	0
BnaC08g38280D	2.377	3.837	1.175	1.58	1.117	0.798
BnaA10g01840D	7.709	13.368	10.877	13.961	15.062	24.369
BnaC09g20370D	16.245	5.406	47.193	86.768	242.259	155.736
BnaA09g54650D	5.456	4.212	2.458	3.172	3.906	3.64
BnaC01g11460D	0.304	0.18	0	0	0	0
BnaC03g17100D	0.061	0.06	0	0.167	0	0
BnaC09g47690D	36.516	36.488	31.93	57.217	62.871	46.815
BnaC08g28980D	0.057	0	0	0	0	0
BnaA03g57230D	0	0.129	0	0	0	0
BnaC05g19840D	67.126	66.242	37.641	61.273	58.366	61.026
BnaC05g04900D	1.32	3.321	0.106	0.327	1.028	0
BnaA02g01600D	76.06	75.717	83.135	90.85	125.898	89.545
BnaA07g09130D	0.036	0	0	0	0	1.186
BnaC09g21010D	22.37	26.444	21.249	25.145	24.431	26.488
BnaCnng26450D	1.516	1.331	1.247	1.01	1.154	0.678
BnaA03g00260D	156.743	95.284	64.729	598.34	293.927	614.46
BnaA01g26210D	0	0	0	0	0	0
BnaA04g06240D	3.33	5.599	3.121	5.15	5.839	9.15
BnaA08g01560D	10.273	12.991	24.711	7.095	10.447	7.178
BnaCnng44700D	9.83	11.085	7.844	6.573	5.46	5.498
BnaA09g16410D	0	0	0	0	0	0
BnaA09g38490D	4.154	4.65	3.429	4.492	3.8	7.182
BnaA01g35720D	0	0	0	0	0	0
BnaC03g58890D	88.728	39.447	152.452	41.138	36.59	41.415
BnaC03g32850D	26.257	27.883	19.364	47.403	36.032	24.001
BnaC08g46250D	103.077	32.65	214.838	94.916	85.705	72.054
BnaC04g24030D	1.062	0.525	1.053	0.724	3.696	0.281
BnaA07g30790D	20.185	72.509	26.21	19.468	17.912	63.826
BnaAnng15700D	0	0	0	0	0	0
BnaC04g29230D	2.335	1.343	1.198	0.591	0.886	0.282
BnaA01g07900D	0	0	0	0	0	0
BnaA08g31260D	7.733	6.747	7.522	6.799	7.472	6.911
BnaA10g09290D	0.103	0.304	0.091	0	0.44	0
BnaC07g27230D	12.893	12.91	19.343	17.494	15.201	15.77
BnaA01g11600D	7.461	4.05	8.198	5.441	4.043	6.339
BnaA05g23630D	25.624	10.595	18.63	11.626	10.609	2.443
BnaC03g05800D	3.349	3.166	1.015	1.407	0.964	2.173
BnaC06g40360D	0	0	0	0	0	0
BnaC05g12060D	5.591	4.784	6.686	9.435	7	7.61
BnaC06g23540D	0.26	0	0.343	0	0.556	0
BnaC09g08310D	14.168	15.381	0	22.126	36.215	12.204
BnaA09g55050D	0.189	0.896	0.1	0	0	0
BnaA03g05790D	0.527	1.399	0	0.12	0.211	0
BnaC09g38720D	0	0	0	0.376	0	0
BnaA09g04850D	16.233	6.555	67.413	7.055	9.898	29.364
BnaC06g39430D	4.544	6.276	4.453	5.73	5.857	5.841
BnaA03g05030D	0	0	0	0	0	0
BnaA03g46880D	43.849	50.115	26.668	43.032	42.02	29.121
BnaA09g21110D	7.216	7.933	5.08	8.228	5.945	4.044
BnaC07g26530D	0.729	0.99	0.321	0.662	0.195	0
BnaC06g07220D	2.875	3.884	1.775	2.679	1.499	2.146
BnaA04g23460D	10.358	12.307	8.041	12.413	14.294	10.609
BnaA09g42190D	4.69	2.906	0.35	0.65	0	8.33
BnaA03g31760D	8.671	8.489	19.726	10.816	15.611	7.844
BnaC07g30120D	77.514	36.169	106.138	45.949	47.35	56.487
BnaC05g12190D	0.15	1.038	0.265	0.318	0.857	0
BnaA03g28360D	12.672	2.489	3.966	3.979	1.807	1.528
BnaC07g17910D	1.076	2.684	0.858	2.702	1.701	3.907
BnaC03g29170D	26.572	25.486	25.635	24.851	36.128	21.971
BnaC05g51120D	2.52	1.341	1.623	0.572	0.052	0.77
BnaC04g33290D	0.599	0.091	0.041	0	0.049	0
BnaC04g15680D	4.896	4.89	2.775	4.57	5.27	5.38
BnaA02g06770D	8.47	6.857	3.317	5.131	2.518	1.619
BnaA02g13630D	2.218	1.805	1.293	1.63	1.746	0.725
BnaA09g44440D	0.062	0.277	0.055	0.057	1.068	0
BnaA03g30760D	3.218	4.24	3.731	4.926	3.385	6.456
BnaA01g06530D	36.522	40.49	31.479	41.358	44.428	70.005
BnaC02g16020D	0	0	0	0	0	0
BnaA05g25980D	1.434	0	0.361	0	0	0.325
BnaC05g49400D	0.094	2.053	0.166	0	0	1.1
BnaC04g55480D	3.623	6.311	2.562	8.837	19.086	8.478
BnaA05g21050D	0	0	0	0	0	0
BnaA01g24640D	7.229	8.769	20.802	27.191	47.509	42.043
BnaC02g38460D	12.224	13.377	3.922	15.608	12.414	12.542
BnaC05g10230D	5.026	5.285	2.792	4.645	3.794	3.535
BnaA03g47890D	14.165	17.789	17.346	19.416	19.018	17.537
BnaA05g04710D	4.039	3.709	3.659	3.825	3.715	3.553
BnaAnng18710D	34.718	33.287	12.191	28.754	19.337	22.514
BnaCnng68140D	4.198	7.57	8.983	8.295	9.487	9.734
BnaC09g45120D	4.219	3.329	3.016	3.64	2.897	3.062
BnaA10g27850D	1.035	1.227	1.033	0.94	1.108	1.241
BnaA02g05910D	3.472	3.431	2.512	2.122	2.305	2.697
BnaC09g31750D	31.822	52.886	52.818	40.349	34.33	29.38
BnaC02g45660D	15.494	19.856	12.686	29.353	42.873	37.215
BnaA01g32830D	13.15	13.896	9.392	8.854	7.293	11.245
BnaA08g13070D	0.046	0	0	0	0	0
BnaC03g64710D	0	0.082	0.037	0.038	0.044	0
BnaA09g40450D	389.054	258.58	815.064	306.531	286.433	340.999
BnaAnng19660D	0	0.062	0	0	0.135	0
BnaA06g36970D	4.074	2.012	1.511	1.266	1.607	0.908
BnaA05g33390D	133.847	62.281	153.665	39.064	40.026	18.931
BnaC03g46030D	6.267	4.105	8.283	6.004	5.396	7.788
BnaA02g18160D	33.961	13.874	17.431	9.509	8.167	3.145
BnaC08g19170D	0	0	0	0	0	0.822
BnaC07g11440D	0.753	1.581	4.229	4.532	9.167	8.368
BnaA01g33880D	0	1.064	0	0	0	0
BnaA07g15670D	42.769	58.567	15.903	36.77	165.869	110.678
BnaA09g11970D	0.027	0	0	0.298	2.43	6.949
BnaCnng66690D	7.182	7.285	10.885	16.533	27.165	18.957
BnaA07g28790D	3.961	4.87	5.584	1.28	1.508	2.795
BnaA03g23160D	0.167	0.605	1.373	0.607	0.953	0
BnaA06g29130D	0	0	0.048	0	0	0
BnaA09g10870D	0	0	0	0	0	0
BnaC07g49090D	1.433	1.166	1.597	0.575	0.271	0.446
BnaC05g44600D	57.929	43.49	84.773	55.952	97.282	75.478
BnaA03g19130D	16.26	12.787	27.106	3.723	1.044	1.652
BnaCnng20770D	150.6	144.41	143.124	89.631	71.337	44.722
BnaA05g23040D	5.359	1.191	4.722	2.922	1.291	6.807
BnaA03g27410D	0.919	0.468	0.392	0.269	0.159	0.408
BnaC03g05560D	5.554	6.831	3.92	7.158	5.915	4.32
BnaA05g08220D	0.092	0.272	0.081	0.25	0	0
BnaA05g31630D	9.031	6.667	2.225	6.088	7.432	5.448
BnaA03g33060D	0.952	2.17	0.723	1.587	2.691	1.905
BnaA02g15000D	0	0	0	0	0	0
BnaC02g39520D	0	0	0	0	0	0
BnaA01g26780D	20.539	19.315	13.646	15.121	15.344	15.814
BnaC07g10410D	0	0	0	0	0	0
BnaC04g51470D	41.973	47.34	52.533	40.98	51.95	42.424
BnaC06g28250D	4.595	2.839	1.865	2.302	2.63	2.125
BnaA03g46900D	11.639	5.911	15.599	5.511	4.124	5.64
BnaA06g02010D	1.284	2.337	3.037	5.281	21.268	23.679
BnaA08g21480D	17.287	17.84	22.275	13.389	16.495	13.509
BnaCnng44420D	3.513	3.644	4.875	4.309	6.393	6.694
BnaCnng72440D	0.482	0	0	0.547	0	4.334
BnaC07g51310D	0	0	0	0	0	0
BnaA04g01120D	211.693	113.723	172.535	119.398	103.921	71.398
BnaA07g22100D	4.766	5.425	6.573	5.304	5.065	8.044
BnaA08g25440D	0	0	0	0	0	0
BnaA09g52370D	25.312	37.414	57.081	31.813	28.497	44.455
BnaA07g24330D	0	0	0.116	4.789	6.629	28.247
BnaC03g09110D	9.205	8.946	8.812	10.082	7.404	10.113
BnaC08g20480D	18.543	24.706	15.544	16.212	15.933	17.349
BnaA09g02890D	9.078	6.406	31.868	12.046	8.175	22.958
BnaA07g12640D	0.798	1.266	0.577	0.595	0.152	0.633
BnaC05g02960D	7.796	8.833	5.339	6.93	6.894	6.818
BnaC01g22380D	2.796	3.387	2.146	2.131	5.118	6.016
BnaC05g21760D	8.295	10.173	7.309	5.198	2.603	1.665
BnaAnng01340D	4.139	5.399	7.86	10.771	11.055	14.208
BnaUnng00280D	3.679	4.94	1.039	0.343	0.757	0.799
BnaA02g16680D	23.597	16.477	51.271	11.226	2.976	5.166
BnaC06g38590D	4.932	8.067	4.973	4.731	7.978	13.111
BnaA09g36620D	35.917	43.057	24.741	45.629	50.988	81.608
BnaA01g03460D	29.075	13.317	31.352	14.078	13.489	7.545
BnaC06g30900D	8.305	11.487	6.713	4.725	6.417	2.446
BnaC02g26730D	0	0	0	0	0	0
BnaC03g50700D	0.572	1.068	0.112	1.098	0.613	4.173
BnaA02g27140D	11.016	19.962	13.973	20.784	25.701	20.03
BnaC01g43380D	9.205	9.779	7	10.37	13.026	18.489
BnaAnng08530D	2.513	4.02	6.959	6.633	7.942	3.8
BnaA08g21700D	4.669	3.777	5.098	4.735	4.708	5.193
BnaCnng67030D	0	0	0	0	0	0
BnaCnng40270D	10.654	13.13	9.581	8.783	7.878	10.581
BnaA04g27540D	7.301	8.927	4.427	6.897	7.351	7.423
BnaC04g10250D	3.477	3.699	2.632	5.833	5.726	11.137
BnaA09g48780D	3.616	4.842	4.193	4.54	3.158	3.979
BnaC08g36050D	0	0	0	0	0	0.859
BnaC01g17560D	23.403	27.207	34.203	29.551	50.307	47.661
BnaC08g35990D	17.307	9.38	20.364	12.621	10.919	12.865
BnaC04g05480D	4.116	5.58	3.472	3.939	5.015	3.754
BnaA07g11780D	5.887	6.495	4.581	6.824	5.212	7.688
BnaC05g29650D	29.233	39.207	27.004	36.275	35.836	37.02
BnaC03g65510D	2.851	3.267	3.265	1.917	3.662	0.543
BnaA02g11690D	76.03	43.742	80.378	24.234	31.062	25.058
BnaA03g26770D	5.915	7.332	7.523	7.048	7.288	5.139
BnaCnng26240D	21.102	19.025	17.745	15.056	16.792	16.521
BnaC02g01330D	7.036	3.283	25.143	5.861	0	7.863
BnaC09g09140D	4.041	3.336	3.561	7.02	3.395	2.6
BnaC06g01320D	3.503	3.659	2.47	5.549	1.768	4.027
BnaC08g31840D	0	0	0	0	0	0
BnaC05g24230D	9.701	9.203	4.727	2.977	1.135	2.448
BnaA09g40440D	26.659	21.071	36.424	18.901	17.546	14.077
BnaA04g04860D	2.275	0.803	4.01	4.431	2.436	4.129
BnaA03g02410D	0	0.187	0	0.043	0	0
BnaC04g29100D	43.281	48.344	30.546	29.662	25.851	41.82
BnaC03g16490D	0.159	0.89	0.42	0.048	0.057	0.393
BnaA02g25430D	0	0	0	0.259	0	0
BnaC03g32530D	753.639	765.101	365.374	285.264	228.589	167.927
BnaC03g38850D	23.632	22.288	17.899	19.19	10.621	7.949
BnaA09g20790D	7.497	5.619	4.458	5.067	2.649	4.731
BnaA02g12760D	0.833	0.274	0.054	0.056	0.231	0.261
BnaA05g19350D	1.214	1.476	1.947	1.301	0.8	2.208
BnaA04g11570D	32.668	20.877	56.619	25.081	19.621	19.175
BnaC07g13300D	19.975	21.174	15.34	3.025	1.039	0.073
BnaA10g13230D	13.163	11.917	8.026	9.551	7.715	7.948
BnaA05g37130D	6.604	6.347	2.822	4.317	2.793	1.562
BnaA04g17700D	82.499	20.628	136.503	49.202	78.132	26.251
BnaA01g02850D	5.452	3.54	5.627	5.756	4.113	3.738
BnaC06g35300D	5.478	8.679	15.23	12.445	34.783	38.498
BnaC08g11300D	6.769	5.167	5.151	2.586	1.894	0.326
BnaA06g06290D	0	0.065	0	0.536	1.227	0
BnaA03g39550D	0.809	2.131	0	1.102	1.443	0.143
BnaCnng66340D	4.24	4.958	8.081	5.975	3.705	7.694
BnaC08g09930D	31.107	24.736	26.919	28.956	28.535	19.545
BnaA09g26310D	22.498	27.37	14.35	6.255	25.522	6.043
BnaC03g73080D	0.563	0.069	0.744	0.064	0	0
BnaA06g19600D	4.491	6.687	0.78	0.575	0.609	1.138
BnaA05g06290D	6.364	8.275	6.185	4.124	4.809	5.003
BnaC08g13280D	0	0	0	0	0	0
BnaC08g19660D	4.003	6.501	1.788	6.478	4.872	4.644
BnaC05g39270D	0	0	0.14	0	0	0
BnaA07g21490D	2.928	1.276	7.437	8.14	6.085	24.346
BnaC05g44360D	16.49	23.463	36.095	31.005	35.526	35.133
BnaA08g08640D	11.628	15.636	7.115	12.033	8.298	2.479
BnaAnng36640D	6.025	4.943	1.422	0.587	0.633	0.285
BnaC08g29830D	0	0	0	0	0	0
BnaA06g19630D	0.98	0.871	1.813	0.801	0.42	0
BnaA09g45420D	0.504	0.498	0.341	0.352	0.041	0.164
BnaCnng04590D	12.206	12.373	5.602	8.925	11.127	9.49
BnaAnng06240D	12.01	11.744	19.437	47.439	15.874	79.139
BnaC09g42890D	4.233	6.12	3.275	3.565	3.794	1.712
BnaA03g17490D	22.353	12.8	34.724	12.054	13.745	13.347
BnaC09g20000D	6.913	9.187	10.242	7.394	9.168	11.528
BnaC07g02880D	2.254	0.548	1.528	1.103	0.594	0.587
BnaC07g20940D	19.605	21.461	36.968	33.493	37.861	20.506
BnaC08g38220D	2.543	2.857	2.349	2.348	2.217	3.886
BnaA05g28220D	15.495	15.631	21.366	18.724	28.693	14.792
BnaAnng15640D	0.556	0.037	0.196	0.707	0.238	0
BnaC08g31320D	1.049	1.067	0.896	2.599	0.884	1.48
BnaA06g36270D	5.059	5.54	3.785	4.584	3.266	2.961
BnaAnng36830D	73.958	76.49	87.646	77.509	57.996	105.438
BnaA09g37100D	0	0	0	0	0	0
BnaA09g56920D	0.284	0.562	0	0.086	0.609	0
BnaA01g15280D	2.828	4.391	1.187	1.958	0.721	0.57
BnaA03g36550D	0	0.378	0.253	0	0.051	0.354
BnaC07g15970D	0.375	0	0.165	0	0	0
BnaA01g23600D	1.057	3.803	0.465	2.4	2.343	1.838
BnaC03g10070D	12.772	14.436	11.194	12.256	14.256	13.63
BnaC04g31050D	5.984	6.623	4.12	7.102	3.466	6.889
BnaC04g08340D	0.08	0.395	0	0	0.086	0
BnaC07g36910D	7.866	7.9	12.866	6.318	10.142	6.395
BnaA02g12850D	0	0	0	0	0	0
BnaA09g05680D	6.737	9.509	28.748	16.005	26.787	72.035
BnaA08g24160D	7.584	7.535	4.795	5.062	5.183	9.072
BnaC05g15880D	3.614	10.296	4.887	6.568	5.488	5.249
BnaA05g03020D	15.621	12.376	15.207	10.253	9.774	5.812
BnaCnng52720D	0	0	0	0	0	0
BnaC09g35440D	0.364	0.18	0.24	0.083	0.584	0
BnaC03g68040D	0.106	0.21	0.281	0	0	0
BnaC02g31160D	0.845	1.336	4.617	0.614	1.809	2.326
BnaA06g05730D	0.47	0.557	0.331	0.171	0	0
BnaC07g42770D	12.716	15.331	7.691	10.543	11.267	19.965
BnaA06g09770D	0.823	0.998	0.89	1.258	0.921	1.544
BnaA07g03580D	0	0	0.09	0	0	0
BnaC01g37620D	17.924	11.722	13.292	15.824	10.174	9.42
BnaC09g48550D	0.2	0.099	0.353	1.818	5.033	9.637
BnaA02g18690D	0.033	0.097	0.086	0.178	0.767	0
BnaA02g33610D	0.496	0.312	0.159	0.123	0	0
BnaA03g20090D	11.639	12.96	8.784	9.579	15.881	16.26
BnaA02g10500D	3.511	3.101	2.601	3.756	3.127	5.231
BnaA07g38570D	26.252	30.467	35.533	30.753	117.319	89.737
BnaA09g09830D	57.477	72.714	62.231	166.566	151.086	232.176
BnaA01g33560D	164.728	76.202	168.863	61.447	36.787	50.815
BnaC04g10580D	16.927	13.752	18.594	15.685	14.484	17.094
BnaC05g46210D	5.315	4.246	0.448	2.415	2.24	2.395
BnaC07g43330D	33.633	27.892	52.239	16.508	15.374	7.407
BnaA08g00380D	503.27	504.028	535.02	245.065	247.902	150.802
BnaA09g28230D	1.096	1.772	0.439	0	0	0.316
BnaC02g08630D	14.751	10.208	11.679	16.344	3.166	5.893
BnaCnng47280D	0	0	0	0	0	0
BnaA09g44370D	13.022	10.984	13.855	10.27	17.03	17.557
BnaC08g33410D	7.369	5.909	7.969	7.653	6.659	10.03
BnaA08g30680D	9.185	9.768	7.531	8.405	7.716	8.441
BnaC09g51280D	0.193	0.334	0.85	0.132	0.052	0.255
BnaC03g72820D	0.373	0.697	0.292	0.339	0.888	0.395
BnaC06g30870D	0	0.057	0	0	0	0
BnaC03g08760D	0	0	0	0	0	0
BnaC08g00620D	0.269	0.228	0.711	4.99	9.578	7.643
BnaC01g10430D	2.902	5.197	2.677	4.615	4.417	6.433
BnaC01g41430D	11.991	6.21	24.116	16.932	3.388	13.402
BnaA05g05120D	8.36	9.686	8.303	9.392	5.288	12.068
BnaA09g46770D	31.622	20.726	37.946	25.604	37.869	23.121
BnaC07g27870D	2.492	2.69	1.723	0.209	0.493	0
BnaAnng01940D	0	0	0.153	0.21	1.114	0.428
BnaA04g16440D	1.745	1.793	0.677	0.127	0.747	0.443
BnaA03g21100D	3.475	2.253	1.339	0	0	0.92
BnaA03g15750D	2.399	2.241	0.154	0.495	2.031	0.762
BnaA09g37200D	10.652	6.337	16.249	13.27	13.242	9.458
BnaC08g14090D	29.018	34.781	57.024	37.95	44.641	53.514
BnaA09g02160D	53.57	9.262	99.517	17.24	76.581	10.043
BnaC05g16020D	0.571	1.818	1.51	1.442	0.951	2.419
BnaC08g08210D	0	0	0	0	0	0
BnaC08g13230D	1017.84	931.105	1374	451.748	500.016	444.382
BnaA02g24660D	0	0	0	0	0	0
BnaC06g37540D	4.095	3.959	3.88	4.682	5.374	5.268
BnaC05g43380D	12.656	17.003	8.913	13.069	11.444	10.861
BnaC05g41500D	1.041	1.6	0.747	0.701	2.476	4.531
BnaA01g03220D	2.385	2.272	2.401	3.947	3.647	2.705
BnaAnng32000D	0	0.147	0	0	0	0
BnaC03g60440D	0	0.158	0.352	0	0	0
BnaA03g40720D	0	0	0	0	0	0
BnaAnng39320D	0	0	0	0	0	0
BnaCnng72610D	2.889	3.488	2.404	4.958	4.466	8.919
BnaA04g20260D	41.946	75.308	49.067	59.145	93.057	81.921
BnaC03g38290D	7.816	5.544	11.949	7.71	11.514	13.579
BnaCnng50290D	0	0	0	0.163	0	0
BnaA10g13520D	0.557	0.526	0.513	0.299	0.027	0
BnaCnng59770D	0	0	0	0	0	0
BnaC05g23630D	5.758	4.178	3.12	5.301	3.6	3.075
BnaC06g27060D	0.81	0.854	0.095	0	0	0
BnaC04g39320D	1.933	2.456	1.46	0.878	0.443	0
BnaA09g57150D	0	0	0	0	0	0
BnaA03g31550D	4.338	4.372	3.784	4.455	3.205	4.225
BnaCnng57170D	1.131	1.971	0.176	0.544	0	0
BnaA03g18640D	4.938	4.345	2.406	3.64	5.128	7.495
BnaCnng10190D	10.403	16.479	20.465	11.897	9.696	10.633
BnaC08g04960D	0.146	0	0	0	0	0
BnaA09g45770D	81.026	21.791	95.359	28.038	8.931	33.391
BnaC03g38060D	0.444	0.798	0	0	0.173	0
BnaC01g31510D	50.367	56.954	41.337	62.138	82.442	68.419
BnaC03g46180D	37.258	46.096	51.804	70.353	53.057	74.725
BnaC09g52870D	2.064	1.457	3.508	2.278	2.367	2.185
BnaA09g46210D	16.939	14.835	12.077	9.332	3.329	9.703
BnaC04g29520D	18.309	22.521	21.313	23.057	22.194	35.38
BnaC03g28620D	15.752	15.972	10.754	15.695	12.721	9.849
BnaA07g08440D	3.854	1.587	0.943	3.21	22.348	14.96
BnaC08g03580D	1.192	1.472	0.225	0.271	0.274	0.676
BnaA06g17050D	6.363	3.269	5.662	4.799	8.242	7.342
BnaA07g31770D	3.694	4.313	1.657	1.343	3.882	2.204
BnaA06g24000D	5.864	4.941	10.789	2.664	5.261	5.568
BnaA10g06230D	1.646	1.697	1.135	1.648	4.163	3.359
BnaC04g55010D	0	0	0	0	0	0
BnaC06g08900D	15.14	25.103	58.58	27.036	20.435	35.818
BnaA03g57380D	2.408	3.31	1.384	5.518	1.681	17.735
BnaC07g36330D	2.771	2.904	1.209	0.839	1.169	1.185
BnaCnng26160D	6.2	5.871	3.651	9.603	4.23	11.8
BnaC04g31880D	28.222	13.759	35.697	6.903	6.155	9.103
BnaA06g02970D	0.427	0.722	1.127	0.332	0.196	2
BnaA09g54840D	0.283	0.768	0.623	2.763	2.952	11.753
BnaA02g05140D	4.336	4.891	3.143	3.576	2.567	3.874
BnaCnng28030D	10.982	14.869	15.698	2.735	1.829	7.234
BnaA02g15110D	1.588	2.68	0.991	0.661	0.992	0
BnaC02g47320D	0	0	0	0	0	0
BnaC07g45190D	36.784	44.323	52.926	46.853	45.295	59.087
BnaC08g01910D	7.829	8.648	5.94	5.336	8.323	5.468
BnaC08g49590D	7.68	11.551	14.746	12.187	13.007	18.93
BnaC02g29940D	0	0	0.18	0	0	0
BnaC04g23430D	13.275	9.939	27.597	25.821	24.202	25.362
BnaC04g54520D	3.242	8.54	10.04	0.625	0	3.016
BnaC02g37590D	3.475	3.949	0.612	0.421	1.55	1.41
BnaA06g36520D	3.123	2.603	4.816	6.386	3.657	5.476
BnaC09g51740D	1.948	2.274	1.638	5.149	1.042	1.874
BnaCnng25410D	1.23	1.159	1.008	0.754	0.306	1.151
BnaC04g46190D	0.81	0.934	0.357	1.043	0.361	0
BnaA01g00340D	3.442	3.018	6.713	5.342	2.774	3.971
BnaA03g38480D	8.257	6.299	6.262	3.989	7.384	4.758
BnaC03g25160D	1.857	0.539	0.674	0	0	0
BnaA03g56890D	15.195	8.901	10.536	12.11	10.533	7.604
BnaC04g15250D	8.067	8.059	10.702	14.331	9.412	16.504
BnaC03g19100D	10.397	9.871	7.936	7.527	10.696	6.684
BnaCnng39980D	0.397	1.266	0.027	0	0.033	0
BnaC02g23160D	7.245	8.787	9.327	10.132	12.307	5.879
BnaC03g31970D	4.813	5.785	4.305	6.235	10.805	6.959
BnaC04g36430D	11.526	6.816	9.86	12.615	16.347	14.518
BnaA08g17210D	0.758	0.999	0.891	1.301	0.947	0.758
BnaA03g00130D	0.393	0.388	0.346	0.179	0.841	0
BnaC03g41120D	7.051	5.115	3.775	4.623	4.3	4.347
BnaC02g19260D	0.245	0.97	0.108	0.223	0.263	0
BnaA02g08060D	0.199	0.328	0.293	0.543	0.426	0.773
BnaA09g21440D	13.018	10.382	19.9	8.409	7.052	21.917
BnaC01g03730D	8.418	11.963	19.915	9.955	10.616	7.081
BnaA10g05530D	21.448	23.1	18.091	18.334	17.785	18.827
BnaA03g28150D	0.141	0.174	0.187	0.257	5.934	0.449
BnaC02g15870D	8.509	5.23	6.323	4.739	3.358	6.766
BnaA06g24420D	11.715	11.091	9.139	10.719	10.711	10.765
BnaC02g27800D	0	0	0	0	0	0
BnaC05g00710D	0.197	0	0	0	0	0
BnaC05g17150D	6.395	6.065	6.987	11.564	19.099	44.342
BnaA07g16360D	8.95	10.03	8.451	8.449	7.379	10.437
BnaA10g13890D	12.864	11.385	7.369	8.563	9.381	11.331
BnaCnng31940D	12.127	6.162	26.866	11.229	13.353	12.471
BnaC05g51090D	3.682	1.702	2.618	4.5	1.429	3.647
BnaA04g15780D	61.228	24.18	94.465	38.639	62.633	38.123
BnaC01g07170D	0	0	0	0	0	0
BnaC07g01200D	20.595	14.656	17.625	21.654	21.371	24.058
BnaC05g22520D	0	0.671	0.12	0	0	0
BnaC09g34440D	12.112	15.808	17.721	17.872	25.217	17.645
BnaCnng51680D	0	0	0	0	0	0
BnaC01g18950D	0	0	0.128	0	0	0
BnaC03g30030D	2.574	2.314	0.68	1.099	0.551	1.962
BnaA03g14810D	1.168	1.64	0.813	1.397	3.785	0.781
BnaA06g12800D	7.128	10.846	10.499	5.437	5.124	5.674
BnaC09g11360D	0	0.022	0	0	0	0
BnaA02g35200D	37.337	62.466	35.585	21.971	15.69	13.251
BnaCnng02900D	10.882	15.464	10.06	22.163	12.337	6.072
BnaA06g20040D	19.914	19.306	25.367	21.823	20.04	21.635
BnaC05g08080D	8.862	9.479	12.329	20.404	17.689	24.265
BnaA01g32930D	0	0	0	0	0	0
BnaA08g01860D	10.706	11.899	8.631	15.711	13.065	11.05
BnaA10g13790D	1.161	1.396	1.068	1.353	0.648	0.374
BnaC05g23780D	9.912	7.085	7.978	5.46	6.639	6.185
BnaA01g33230D	32.564	32.582	57.66	62.292	57.952	60.385
BnaC06g07160D	1.35	0.8	1.903	1.431	0.963	1.191
BnaC03g19900D	0.316	0	0.279	0.096	0.79	0
BnaA09g40180D	19.983	18.14	27.56	26.527	27.778	32.254
BnaA10g15450D	0.464	0.688	0.358	0	0	0
BnaCnng35820D	9.338	11.484	16.539	14.286	9.078	17.955
BnaC02g42230D	0	0	0	0	0	0
BnaC02g11920D	3.467	2.355	3.856	2.087	0.232	1.835
BnaC03g39550D	14.547	15.725	12.584	12.455	13.3	14.136
BnaC08g42090D	0.029	0.058	0	0.241	0	0.062
BnaC05g14350D	6.429	6.351	4.747	5.619	5.243	7.778
BnaA10g21020D	1.894	1.706	1.742	1.594	1.997	1.209
BnaA07g08740D	5.628	2.324	6.513	1.755	2.518	3.512
BnaC04g40250D	18.642	22.584	14.592	11.957	13.093	10.061
BnaC09g42040D	2.242	1.201	0.636	0.622	0.163	1.167
BnaA01g26630D	5.779	6.021	4.758	4.161	3.482	3.075
BnaC02g32060D	35.82	57.283	68.763	36.108	59.205	54.91
BnaAnng23860D	0.282	0.464	0.248	0.085	0.067	0
BnaA02g36610D	9.528	13.294	3.093	8.43	6.531	6.99
BnaA08g23830D	0.78	0.257	0.076	0.079	0.371	0.734
BnaA02g00620D	6.307	7.104	4.668	7.68	12.896	9.181
BnaA07g31970D	0.615	0.214	1.721	0.493	0.387	0.191
BnaC05g12090D	46.897	32.227	60.981	41.251	49.011	45.446
BnaC03g52000D	10	8.65	6.996	12.285	5.743	11.904
BnaA10g12120D	40.342	39.395	36.145	24.079	19.82	17.308
BnaC02g28840D	0	0	0	0	0	0
BnaA09g23840D	2.994	3.318	3.152	4.113	2.814	7.382
BnaA02g20180D	3.699	2.784	2.677	9.604	4.573	4.569
BnaAnng05530D	45.469	177.459	89.93	39.145	33.023	19.955
BnaC02g19940D	0.244	1.444	0.858	0.553	0.652	1.676
BnaA04g26740D	0	0	0	0	0	0
BnaC01g26840D	2.045	3.444	1.966	2.407	2.289	0.886
BnaA07g35380D	10.083	10.602	15.568	11.516	6.635	12.046
BnaC06g39290D	14.173	20.624	13.416	28.368	30.138	30.92
BnaUnng00600D	0	0	0	0	0	0
BnaC08g21150D	9.428	9.402	5.503	5.432	5.158	6.391
BnaC02g48920D	18.466	18.243	22.974	22.216	31.706	32.998
BnaA08g12330D	0	0	0	0	0	0
BnaC03g11330D	0	0	0	0	0	0
BnaA03g23110D	0	0	0	0	0	0
BnaA04g11380D	6.329	6.426	5.019	10.224	8.092	8.784
BnaC02g01750D	45.307	8.546	24.602	7.938	0	2.629
BnaA10g15660D	0	0	0	0	0	0
BnaC09g24710D	1.515	3.57	2.259	1.906	6.862	9.624
BnaC05g12620D	0	0	0	0	0	0
BnaC09g54460D	145.964	65.788	186.865	72.386	86.705	76.555
BnaA01g10500D	4.212	8.23	4.608	6.14	4.707	3.724
BnaA09g55700D	0.393	0.155	0.277	1.07	0.42	0
BnaA04g22820D	37.01	37.86	62.28	22.962	9.506	4.353
BnaC09g15770D	5.58	7.913	9.674	10.631	13.584	7.622
BnaC06g03640D	1.436	1.418	0.23	0.712	0.419	0
BnaC05g36380D	0.24	0.395	0.141	0	0	0.677
BnaC07g09270D	0	0	0	0	0	0
BnaC08g39620D	12.141	17.309	48.071	12.848	23.032	6.996
BnaC04g17780D	48.18	17.599	42.014	16.865	18.315	9.648
BnaC08g30860D	0.136	0.067	0.06	0	0	0
BnaC03g01440D	0	0	0	0	0	0
BnaC03g00060D	320.585	362.609	252.579	374.554	325.588	327.334
BnaA02g12920D	0	0.106	0.047	0.146	0.057	0.396
BnaA08g15920D	33.657	57.059	27.638	42.211	23.184	63.566
BnaCnng64110D	10.251	6.167	2.504	5.58	2.227	2.525
BnaA03g33260D	0	0.173	0.231	0.08	0.656	0
BnaA01g15860D	0	0	0	0	0.081	0
BnaA04g19940D	5.428	5.287	4.716	6.461	6.22	5.099
BnaA01g11650D	0	0.039	0	0.054	0	0
BnaC04g17010D	4.032	6.525	3.011	5.723	2.138	6.626
BnaA06g22680D	17.429	14.147	25.489	31.478	22.916	26.414
BnaC06g32230D	14.152	14.328	28.952	18.462	21.3	25.811
BnaA05g18220D	0	0	0	0	0	0
BnaC03g28130D	4.61	3.741	10.59	7.48	8.283	11.329
BnaC04g40880D	7.629	9.212	9.069	8.252	8.555	6.922
BnaC09g26150D	15.771	10.119	12.738	21.867	13.632	17.847
BnaC05g24480D	8.937	8.44	10.538	5.892	5.252	3.988
BnaC02g07930D	2.245	0.845	8.572	1.263	0.229	2.377
BnaA03g39930D	10.021	5.451	10.417	8.287	10.325	7.43
BnaC09g18780D	15.429	15.47	12.129	6.567	8.043	6.861
BnaA01g06120D	0.083	0.495	0.074	0.19	0.268	0.972
BnaC06g40530D	7.75	1.565	15.676	17.785	26.947	2.785
BnaA03g56300D	15.992	17.313	12.403	10.964	10.046	7.198
BnaA06g20460D	0.126	0.125	0	0.057	0.405	0
BnaCnng56390D	0	0	0	0	0	0
BnaA05g26870D	0	0	0.303	0.125	0	0
BnaA02g15260D	0	0	1.312	0	0	0
BnaC08g28100D	1.951	2.409	1.02	1.412	1.24	1.258
BnaC05g17210D	0	0	0	0	0	0
BnaC08g01720D	10.287	4.225	10.642	4.516	4.083	10.339
BnaA06g13190D	2.69	4.725	1.317	3.056	2.16	2.927
BnaCnng73640D	0	0	0	0	0	0
BnaC08g48490D	0	0	0	0	4.687	1.39
BnaC05g03160D	3.978	4.168	2.841	2.901	1.734	4.245
BnaC03g31520D	5.391	2.145	5.542	5.852	4.088	8.165
BnaC06g13750D	0.097	0.192	0.513	0.529	0.364	0
BnaA07g05040D	5.522	8.268	3.801	7.801	10.944	13.609
BnaC08g22330D	0.761	1.41	0.252	0.692	0.611	0
BnaC03g72760D	0.459	2.571	1.618	1.669	1.639	2.107
BnaC06g03820D	5.421	6.087	4.035	5.079	5.046	4.277
BnaA09g23690D	4.122	3.001	3.314	3.483	4.916	6.929
BnaAnng23230D	47.111	15.313	59.568	13.956	14.02	10.673
BnaC03g54220D	0	0	0.165	0.298	0.25	0.297
BnaC01g02350D	2.38	2.125	1.087	1.65	1.095	1.661
BnaA08g08980D	22.494	24.409	18.938	35.614	44.662	33.405
BnaC09g32870D	12.904	12.157	13.854	4.349	3.385	4.976
BnaC05g06130D	8.705	8.832	5.856	11.01	9.004	10.087
BnaC05g26310D	1.82	2.168	3.537	5.496	12.549	10.824
BnaC08g47190D	32.512	31.905	24.013	28.355	32.85	20.542
BnaA03g38570D	0	0	0	0	0	0
BnaA06g04030D	4.77	4.309	2.372	3.468	3.903	3.174
BnaCnng23010D	0	0	0	0	0	0
BnaC03g05400D	4.822	7.06	6.911	5.86	6.095	6.212
BnaA05g29010D	19.351	10.025	64.981	119.445	284.711	428.713
BnaC09g17320D	6.797	7.974	8.984	13.235	18.126	29.426
BnaC02g34800D	6.77	8.419	13.063	14.32	6.748	11.554
BnaC03g50210D	617.764	435.16	1183.24	217.921	309.072	176.464
BnaC05g33410D	0	0	0	0	0	0
BnaC02g37900D	4.045	3.774	4.95	3.716	3.079	5.519
BnaA04g26780D	312.067	247.245	371.029	117.181	92.555	59.121
BnaC06g09020D	2.235	2.01	2.028	2.061	0.714	0.424
BnaC05g08030D	0	0	0	0	0	0
BnaAnng05080D	0.146	0.481	0.471	0.796	0.104	0
BnaAnng18420D	4.344	9.267	8.265	8.972	13.107	24.773
BnaA05g29940D	141.661	76.648	155.066	113.703	205.314	67.636
BnaC01g13220D	2.486	2.365	3.001	0.335	0.296	0
BnaAnng05580D	2.517	1.582	2.15	0.658	0.449	1.332
BnaA09g06470D	3.218	4.806	4.154	3.502	5.408	9.785
BnaA06g09100D	2.815	1.804	2.413	2.696	1.14	2.013
BnaC06g09630D	0.884	1.091	0.292	0.1	0.828	0
BnaA03g38380D	9.029	8.866	2.893	8.851	9.372	3.534
BnaA04g21320D	0	0	0	0	0	0
BnaC07g07780D	6.77	8.67	15.318	16.253	13.958	16.192
BnaC02g12860D	2.11	2.085	3.089	1.105	0.306	1.818
BnaAnng07190D	0.458	1.585	0.404	0.347	0.491	0
BnaA10g15240D	5.954	6.756	3.688	9.214	6.816	11.047
BnaA03g59950D	0	0	0	0	0	0
BnaC07g23790D	2.28	2.172	2.583	0.592	1.831	0
BnaC07g17290D	9.482	8.275	8.773	8.664	7.895	12.604
BnaC04g26360D	5.971	9.978	10.523	9.847	12.784	12.019
BnaC07g25030D	2.747	2.752	0.648	0.774	0.911	0.533
BnaC06g20920D	26.161	38.441	42.826	42.114	65.393	48.924
BnaC08g47120D	85.886	68.598	57.351	90.578	86.701	79.044
BnaA07g37870D	15.821	12.735	8.296	14.046	14.576	12.273
BnaA09g30070D	1.424	1.925	1.057	3.814	1.083	1.627
BnaC07g08370D	3.328	3.095	3.278	1.008	0.559	0
BnaCnng75070D	0	0.132	0	0	0.999	0
BnaC09g34300D	0	0.096	0	0.176	0	0
BnaA06g12580D	13.968	13.658	22.514	17.371	20.412	17.562
BnaA08g08360D	152.6	60.099	132.821	41.627	37.894	39.915
BnaC06g30130D	0	0	0	0	0	0
BnaC07g05400D	8.641	8.842	16.533	9.254	10.836	13.134
BnaC09g31220D	2.55	2.693	8.599	5.512	0.941	5.398
BnaA01g36810D	5.144	3.176	7.983	25.072	34.855	36.449
BnaC01g33830D	35.442	42.224	29.621	24.943	23.945	13.978
BnaA09g17090D	11.938	17.225	10.678	17.112	17.217	16.216
BnaA03g52100D	0	0	0	0	0	0
BnaCnng03420D	0	0	0	0.387	0	1.954
BnaC03g74400D	1.925	0.561	4.116	3.27	2.298	0.702
BnaC05g07920D	6.277	7.625	4.117	4.859	5.5	4.233
BnaA09g43650D	3.122	7.961	0.959	4.288	5.595	12.911
BnaCnng62310D	5.494	5.88	6.051	10.262	8.413	6.22
BnaC01g01400D	23.469	25.721	30.935	29.515	29.008	15.901
BnaA03g51210D	10.277	11.036	2.441	0.893	0.383	1.041
BnaA07g36590D	2.663	3.007	5.252	4.264	5.567	5.102
BnaC02g16390D	0	0	0	0	0	0
BnaC06g08880D	0.753	1.4	0.507	1.046	0.047	0
BnaA01g08360D	14.559	7.349	23.247	26.17	13.679	19.922
BnaC03g04240D	0.745	1.309	0.255	0.916	0.369	0.409
BnaA04g20880D	0.23	0.227	0.243	0.376	0.148	0.195
BnaA04g27720D	8.068	5.957	5.496	6.991	4.452	4.799
BnaA08g26300D	61.439	59.293	36.578	91.18	170.138	49.054
BnaA10g18470D	7.344	9.007	11.603	6.904	13.148	11.26
BnaA06g40410D	19.891	20.926	16.428	22.805	16.291	12.813
BnaC03g37160D	5.276	4.998	4.88	5.389	5.182	7.433
BnaC05g37160D	4.764	1.852	9.084	0.071	0.084	0
BnaC09g19830D	15.625	17.724	21.125	18.481	18.585	16.979
BnaA10g00230D	0	0	0	0.076	0	0
BnaC02g01110D	6.605	1.377	11.319	5.231	0	11.033
BnaCnng10130D	0	0	0	0	0	0
BnaA02g17410D	0.156	0.461	0.274	0.283	0	0.165
BnaA10g09600D	0.094	0.074	0	0	0	0.139
BnaC03g68380D	8.87	8.265	8.324	13.237	13.433	8.551
BnaCnng78640D	24.967	27.194	14.226	33.029	29.372	29.701
BnaC09g36190D	5.025	3.027	20.192	10.69	8.396	1.297
BnaC08g23490D	4.321	15.091	5.49	1.324	0	1.33
BnaA05g23320D	6.25	5.125	7.811	7.647	8.483	3.46
BnaC03g37360D	0.063	0	0	0	0	0
BnaC09g08820D	2.132	3.452	0	3.552	1.395	0.188
BnaA05g31840D	2.14	0.83	1.313	1.979	1.595	0
BnaA03g00790D	0	0.507	0	4.198	10.99	34.506
BnaC07g09630D	16.334	25.516	24.725	26.767	11.508	46.26
BnaA01g23930D	0.08	0.159	0.213	0	0.172	0
BnaA04g06150D	36.071	14.569	12.573	13.689	9.426	2.976
BnaC01g41160D	15.536	22.544	2.995	1.324	4.678	0
BnaC06g12590D	0	0.033	0	0	0	0
BnaA10g19400D	1.013	1.764	1.19	2.28	6.146	5.873
BnaA03g06690D	0.262	0	0.231	0.238	0.561	0.208
BnaA08g08330D	18.868	18.988	27.237	33.151	19.124	33.362
BnaCnng54190D	3.862	5.013	1.368	0.103	0.081	0
BnaA10g27040D	8.239	8.326	10.64	10.401	8.887	11.052
BnaC08g42940D	0.231	0.19	0.034	0.489	0.123	0
BnaC08g15110D	105.273	45.559	121.612	26.899	17.478	17.138
BnaA08g18090D	14.548	12.569	17.498	16.035	23.272	17.861
BnaC08g16810D	3.154	3.636	3.044	6.551	9.165	7.314
BnaA10g06750D	25.033	34.603	21.033	39.42	74.715	49.348
BnaA07g02380D	6.87	10.389	4.159	6.073	5.653	4.898
BnaC05g06400D	4.155	4.49	1.716	2.832	2.363	0
BnaCnng45730D	2.958	0.585	3.041	1.075	0.528	3.341
BnaC05g41940D	5.936	8.312	4.268	7.578	7.641	6.901
BnaA05g20580D	36.709	29.334	31.584	24.2	21.844	11.163
BnaC06g03040D	30.38	59.619	29.729	95.909	51.098	126.453
BnaA03g47730D	0.601	0.462	1.176	1.031	0.357	1.696
BnaC04g55100D	6.041	3.765	10.772	10.194	7.236	17.89
BnaC04g24780D	64.209	27.461	106.2	30.993	33.133	30.968
BnaC09g42860D	10.803	15.823	13.513	15.72	21.916	28.392
BnaCnng26980D	15.894	14.91	7.902	18.501	13.307	11.809
BnaA09g00350D	41.454	66.987	1.575	8.551	7.656	0.996
BnaA07g25090D	0	0.05	0.133	0	0.054	0
BnaC03g46730D	2.366	3.477	2.39	3.88	3.089	4.704
BnaA10g14340D	101.298	46.455	77.765	60.753	68.916	39.376
BnaA06g04040D	0.048	0	0.084	0	0	0
BnaA02g14340D	10.51	15.302	1.462	0.352	0	0.41
BnaA06g16750D	0	0	0	0	0	0
BnaA10g20830D	29.083	35.03	20.243	17.256	22.603	20.666
BnaC06g20160D	1452.96	1641.18	3140.12	784.123	859.289	719.333
BnaC05g04600D	0.381	0.376	0.391	0.346	0.679	0.605
BnaCnng26310D	3.343	2.774	3.535	4.192	1.646	1.77
BnaA09g04810D	8.743	11.447	13.799	8.253	13.176	28.037
BnaC05g19800D	3.402	3.086	2.63	0.568	0.446	0.955
BnaCnng25330D	0.282	0	0	0	0	0
BnaA01g31620D	29.038	71.572	21.322	9.62	18.295	5.764
BnaCnng09840D	4.835	4.472	5.076	4.487	5.726	8.712
BnaA01g01960D	16.747	18.599	9.566	10.6	7.294	12.349
BnaC07g38650D	21.652	25.857	15.176	2.997	4.021	2.845
BnaA06g10050D	5.573	8.614	8.475	12.742	16.262	11.419
BnaC01g23210D	20.657	11.254	12.734	10.763	11.163	10.589
BnaC09g34040D	19.983	20.048	32.311	24.149	31.206	24.1
BnaAnng10720D	5.568	7.77	6.764	4.974	2.795	1.332
BnaC03g64670D	0.855	1.408	0	0	0	0
BnaC03g44140D	17.324	8.378	23.057	9.197	8.98	5.695
BnaA04g28600D	24.96	29.641	37.692	55.367	29.059	21.709
BnaC08g49400D	1.648	2.485	3.668	2.364	1.671	2.111
BnaA06g36720D	1.505	1.692	1.006	1.509	0.833	0.714
BnaC03g00160D	360.315	235.429	254.465	763.905	2000.23	2194.4
BnaCnng54570D	4.836	4.607	4.109	4.656	5.67	7.253
BnaC09g00860D	0.336	0.398	1.066	2.565	0.144	5.052
BnaC09g51110D	3.268	2.344	0.418	2.06	3.894	0
BnaC09g52250D	0.774	1.312	1.462	0.201	1.066	0.468
BnaC03g02210D	0	0	0	0	0	0
BnaC05g20130D	4.797	5.635	11.08	6.832	7.077	9.607
BnaA01g23340D	3.548	3.067	8.375	4.318	2.917	1.207
BnaA04g19410D	84.401	171	115.942	183.104	433.248	279.263
BnaC08g23090D	4.574	3.898	2.291	5.297	2.304	1.899
BnaCnng73940D	3.528	3.154	4.984	4.275	2.518	2.49
BnaC05g16180D	0.453	0.224	1.796	1.544	1.576	3.118
BnaC01g33340D	4.277	1.988	11.305	8.001	6.733	12.65
BnaA08g02260D	9.043	10.423	11.083	11.483	8.873	14.912
BnaC05g16910D	92.613	39.938	86.634	41.352	38.141	51.863
BnaCnng07210D	0.056	0	0	0	0	0
BnaC09g01480D	4.853	5.495	0	6.54	8.872	0
BnaA04g15860D	9.279	9.167	16.846	12.563	14.4	6.922
BnaC06g04510D	0	0	0	0	0	0
BnaA05g12500D	8.592	5.578	16.656	16.396	10.906	31.187
BnaA01g23290D	5.482	5.343	6.984	6.597	6.344	9.489
BnaA09g03220D	0	0	0	0	0	0
BnaA10g00350D	2.888	6.833	2.679	4.834	2.522	4.666
BnaCnng38080D	19.456	25.98	21.449	25.51	35.378	38.843
BnaA02g14540D	15.003	14.942	17.164	3.078	1.166	2.049
BnaA06g20160D	6.172	4.691	3.651	5.02	5.406	5.94
BnaA01g02350D	1.875	3.343	0.862	5.963	9.905	5.178
BnaC07g28140D	0	0	0	0	0	0
BnaCnng66900D	0	0	0	0	0	0
BnaA10g29560D	92.205	28.071	172.183	55.537	24.027	37.649
BnaC01g20800D	6.667	7.144	9.852	4.199	3.172	2.913
BnaA07g33880D	20.24	41.644	9.081	21.429	33.295	74.504
BnaA07g32230D	32.571	37.366	37.865	38.078	46.42	77.402
BnaA09g26420D	1.655	1.168	1.926	3.114	6.072	7.757
BnaA01g06430D	0.157	0.217	0	0	0	0
BnaC05g19960D	10.242	6.255	10.392	2.82	0.997	2.234
BnaA09g47100D	4.463	3.932	2.019	3.891	4.713	7.086
BnaC03g12140D	0	0	0	0	0	0
BnaA01g28850D	5.616	8.623	4.948	6.013	5.514	3.9
BnaA03g27380D	5.074	7.742	5.663	5.994	5.432	1.612
BnaC03g24470D	23.619	16.706	34.764	26.95	30.025	36.938
BnaC03g31880D	18.917	17.055	12.26	14.654	11.864	6.774
BnaC01g39390D	1.993	2.572	1.505	1.478	1.568	0.043
BnaA05g19640D	0	0.102	0	0.187	0	0
BnaC08g21130D	13.846	13.775	19.554	19.596	17.766	21.859
BnaA08g16870D	0	0	0	0	0	0
BnaC09g38000D	11.81	11.137	1.892	11.869	1.724	1.137
BnaA07g09590D	0.036	0	0	0	0	0.077
BnaC06g24350D	37.678	26.249	41.1	47.495	28.728	48.46
BnaC01g25250D	4.273	4.038	4.31	4.67	10.076	6.031
BnaC04g13880D	11.434	10.95	9.766	7.165	8.254	8.209
BnaA07g04930D	2.296	4.184	1.978	2.967	2.239	2.485
BnaC04g38340D	1.025	1.35	1.467	3.492	12.48	10.127
BnaA03g55530D	11.288	13.539	12.882	16.2	7.134	7.496
BnaA05g04670D	5.192	7.083	5.083	5.616	5.116	4.711
BnaA07g15890D	16.318	17.39	29.888	21.624	20.946	20.554
BnaC04g29350D	11.632	15.417	14.749	15.125	17.919	16.92
BnaC08g12740D	0	0	0	0	0	0
BnaC07g23050D	19.088	20.607	14.48	27.683	52.234	101.974
BnaCnng66600D	0	0	0	0	0	0
BnaC05g48790D	0.334	0.11	3.53	0.202	0.119	1.178
BnaA02g35980D	0.107	0.318	0.378	0.39	1.148	0
BnaC05g03430D	25.409	31.462	32.637	60.133	557.893	332.229
BnaA06g09160D	0.496	0.98	0.159	0.164	0.386	0.143
BnaA08g00040D	8.675	7.666	4.123	7.157	6.052	4.747
BnaA09g00820D	37.391	33.508	9.722	12.234	20.654	8.142
BnaA06g39950D	8.214	3.439	0.797	3.795	1.863	2.727
BnaA02g05330D	0.616	1.685	0.376	0.301	0.456	0
BnaC08g08590D	3.195	1.578	1.207	3.733	1.466	5.315
BnaC05g41310D	5.798	6.206	2.912	3.934	3.641	4.338
BnaA04g16000D	0	0	0	0	0	0
BnaC02g18420D	3.111	1.064	5.588	5.437	9.351	8.108
BnaC06g02520D	0.979	0	1.972	1.779	2.845	3.257
BnaC02g01620D	0	0	0	0	0	0
BnaA10g01750D	13.461	16.159	22.618	20.197	22.201	27.755
BnaA03g36650D	6.543	9.187	10.924	19.09	9.831	13.976
BnaA05g01560D	2.069	3.477	3.812	3.711	3.135	4.722
BnaA07g37390D	17.575	12.178	7.077	4.372	4.767	2.652
BnaCnng23250D	0	0	0	0	0	0
BnaA09g51620D	139.09	108.688	23.927	131.107	92.969	43.553
BnaC08g26690D	4.901	4.767	15.28	14.182	13.802	21.471
BnaC08g25170D	65.378	64.209	64.19	57.568	76.179	51.603
BnaA03g00220D	120.288	112.641	193.295	119.462	96.266	89.857
BnaC08g15340D	1.139	1.126	0	0	0	0
BnaA09g29500D	12.674	8.407	13.481	11.558	8.189	10.638
BnaAnng20020D	3.236	2.656	1.667	2.398	2.825	1.897
BnaCnng19850D	27.432	24.88	47.352	64.873	23.589	72.008
BnaA03g57480D	0	0	0	0	0	0
BnaA08g20420D	0	0	0	0	0	0
BnaC05g30230D	0	0	0	0	0	0
BnaA07g26960D	48.097	72.338	54.772	71.997	113.549	111.611
BnaA05g34470D	1.264	0.78	1.392	4.163	0.846	7.944
BnaA08g00650D	3.718	2.254	6.702	5.375	7.689	8.052
BnaA05g33130D	0	0	0	0	0	0
BnaA05g23510D	2.17	3.613	0.602	3.323	1.979	1.021
BnaC06g17300D	2.86	4.11	5.544	2.74	2.894	2.587
BnaUnng04020D	0.539	1.064	0.079	3.1	1.538	0.665
BnaC07g08090D	2.038	2.96	1.388	2.414	1.653	2.387
BnaUnng02120D	0.753	0.85	1.516	1.368	5.87	0.911
BnaCnng21170D	21.176	23.832	8.105	14.563	12.027	23.357
BnaA04g26030D	12.578	12.836	13.701	17.709	21.676	20.997
BnaC06g18340D	6.387	7.58	5.225	11.758	9.723	9.264
BnaA04g18100D	5.087	5.578	2.23	2.742	4.455	2.293
BnaC08g33480D	0	0	0	0	0	0
BnaA09g10040D	3.417	2.91	3.114	2.998	4.414	0.125
BnaC01g03500D	0	0.213	0	0	0	0
BnaC09g25370D	0.326	0.215	0.383	0.296	0.466	0.115
BnaC05g52110D	0.597	1.233	0.908	1.282	1.917	1.378
BnaA03g24380D	45.527	22.447	47.756	23.088	22.929	26.072
BnaC06g38570D	5.635	4.298	6.795	5.345	8.467	18.892
BnaA03g15530D	5.126	5.718	2.477	4.808	4.602	7.002
BnaC09g43030D	7.265	4.459	5.092	4.001	4.713	4.137
BnaA03g29270D	4.547	5.88	2.671	7.558	4.986	8.962
BnaA09g17460D	1.782	2.263	1.009	1.85	1.771	0
BnaA06g23580D	0.599	0.099	1.937	1.634	0.267	0.846
BnaAnng17520D	0.135	0.044	0.357	0.123	0.385	0.143
BnaC03g25340D	0.277	0.11	0	0.101	0.356	0
BnaC05g06660D	0.506	2.502	2.231	1.611	3.253	3.217
BnaA08g03740D	0.235	1.699	0.482	0.781	1.255	0.497
BnaC05g01070D	4.276	1.286	5.133	2.027	2.455	1.771
BnaC01g19510D	16.825	10.673	15.886	13.679	15.546	12.337
BnaC09g04490D	3.781	7.981	0.278	2.056	5.428	0.334
BnaA07g02570D	0	0	0	0	0	0
BnaC01g43090D	25.997	20.928	13.904	8.628	8.418	7.362
BnaA03g52920D	3.319	4.654	3.396	7.685	10.2	20.287
BnaA03g20140D	6.729	3.651	11.907	5.212	6.908	4.029
BnaC03g39530D	0	0	0	0	0	0
BnaC02g23100D	3.866	6.953	4.367	10.178	35.653	13.327
BnaC04g13440D	1.337	1.486	1.399	0.911	1.432	0.531
BnaA09g37930D	0	0	0	0	0	0
[truncated: 50,963 more rows]

## Sheet: S2
Gene ID	log2(FoldChange)	FDR
BnaC04g42010D	1.00451	0.04302
BnaC06g38200D	1.01684	0.026272
BnaC03g16140D	1.1129	0.0360599
BnaA08g28620D	1.11672	0.0435852
BnaC01g13990D	1.1189	0.0220174
BnaC09g27270D	1.12383	0.0437157
BnaA04g07260D	1.13812	0.022461
BnaCnng55020D	1.17724	0.046751
BnaA02g04260D	1.19724	0.0280201
BnaA05g07690D	1.21212	0.0486763
BnaA10g09640D	1.22901	0.0437095
BnaC05g07490D	1.2398	0.030698
BnaA04g00820D	1.24587	0.0349536
BnaA09g13300D	1.25446	0.0161826
BnaA09g29060D	1.25697	0.00403053
BnaA06g16270D	1.2699	0.00167771
BnaCnng66800D	1.27095	0.0352195
BnaA02g33310D	1.2721	0.039767
BnaC06g10380D	1.30327	0.023933
BnaC04g31670D	1.30534	0.0355484
BnaA09g19060D	1.30835	0.0249435
BnaA04g07970D	1.3097	0.0175414
BnaC04g45720D	1.3127	0.0261798
BnaA06g18440D	1.31635	0.0373977
BnaAnng05950D	1.31682	0.0423783
BnaC07g21010D	1.32546	0.0484212
BnaC01g14990D	1.36228	0.0293449
BnaAnng26280D	1.36618	0.0110055
BnaAnng17870D	1.38329	0.00713433
BnaA01g04780D	1.38409	0.046235
BnaA06g34720D	1.38538	0.00672947
BnaA03g16650D	1.38543	0.0114263
BnaA01g13700D	1.38861	0.0280954
BnaC01g25430D	1.38889	0.0488242
BnaA09g34460D	1.39526	0.0383649
BnaA03g06670D	1.41133	0.0327633
BnaC01g41470D	1.41602	0.0144854
BnaA06g13760D	1.41638	0.030463
BnaC01g10130D	1.41645	0.0167438
BnaC03g30720D	1.41991	0.00102347
BnaC08g11410D	1.42682	0.0150063
BnaC04g28570D	1.43384	0.0465095
BnaC07g00150D	1.43582	0.0287481
BnaA07g06330D	1.44446	0.0443619
BnaC09g47020D	1.44473	0.0100631
BnaA10g18740D	1.44721	0.0441775
BnaC04g43980D	1.45317	0.0405834
BnaC04g31650D	1.45341	0.0415947
BnaCnng44750D	1.4669	0.00293499
BnaA03g15290D	1.47303	0.0263889
BnaC02g48590D	1.47522	0.0478489
BnaA07g33590D	1.47698	0.00229937
BnaCnng57580D	1.48416	0.0209409
BnaA10g11760D	1.48673	0.0339149
BnaA03g47830D	1.4987	0.0108453
BnaC07g40860D	1.49959	0.0311403
BnaA07g00540D	1.49977	0.0149287
BnaA02g20750D	1.50555	0.0427589
BnaA01g19710D	1.51199	0.0307415
BnaC01g03320D	1.51529	0.0380835
BnaC06g13300D	1.52011	0.0357667
BnaC06g01490D	1.52038	0.0248951
BnaC07g18960D	1.52634	0.00438521
BnaA09g09830D	1.53718	0.00125381
BnaA01g03330D	1.53761	0.0189064
BnaC05g04860D	1.55468	0.0194562
BnaA01g13540D	1.5582	0.0111197
BnaA04g26460D	1.56112	0.0464172
BnaC04g07760D	1.56282	0.0273961
BnaC06g34480D	1.56296	0.0437389
BnaAnng19740D	1.5675	0.0395954
BnaA01g34960D	1.57961	0.0233077
BnaC08g48460D	1.58166	0.0016982
BnaC02g48600D	1.58889	0.019235
BnaC07g33090D	1.58903	0.00476774
BnaC02g39630D	1.59316	0.0111197
BnaC01g04650D	1.59519	0.00282008
BnaC02g13840D	1.60648	0.0181129
BnaA01g11390D	1.60785	0.0332205
BnaA06g21560D	1.62514	0.0198579
BnaA02g03410D	1.63091	0.012398
BnaAnng22050D	1.66151	0.0134676
BnaC05g13120D	1.67314	0.0309791
BnaC04g00160D	1.67899	0.0131184
BnaC03g25880D	1.68121	0.00844967
BnaC08g24040D	1.68931	0.00470203
BnaA06g36140D	1.69972	0.00360493
BnaA08g13840D	1.70039	0.0298578
BnaC07g34380D	1.71396	0.00750473
BnaA01g03370D	1.72167	0.00856167
BnaC04g21680D	1.72552	0.0457784
BnaC09g40730D	1.73094	0.00168189
BnaC08g28550D	1.73313	0.021613
BnaAnng15080D	1.73552	0.00373295
BnaC03g74750D	1.73704	0.00654208
BnaC07g50310D	1.74023	0.0180666
BnaC04g43780D	1.74473	0.01374
BnaA04g21850D	1.74657	0.00467966
BnaA02g36210D	1.74798	0.0439097
BnaC08g49820D	1.74867	0.027661
BnaA03g23800D	1.75019	0.00380748
BnaC01g28850D	1.75159	0.0353136
BnaA05g35970D	1.75269	0.0187052
BnaA06g08850D	1.75553	0.0120947
BnaC02g39950D	1.75783	0.0188882
BnaAnng34370D	1.75794	0.0358712
BnaC07g48820D	1.76863	0.015107
BnaC07g23050D	1.77461	0.0359366
BnaA03g24720D	1.77537	0.0182721
BnaAnng23920D	1.78137	0.0153027
BnaA08g30600D	1.79147	0.00550337
BnaCnng24320D	1.79504	0.00403053
BnaC08g24010D	1.79979	0.00891695
BnaA01g13500D	1.80557	0.0108586
BnaA04g00910D	1.81035	0.0277016
BnaA04g28730D	1.8124	0.0351801
BnaA03g48570D	1.81284	0.0143421
BnaC07g15270D	1.81784	0.0155739
BnaA07g15770D	1.81817	0.029568
BnaAnng31420D	1.82201	0.0487067
BnaA03g23010D	1.82387	0.0324203
BnaC03g21860D	1.82573	0.00366323
BnaA02g15990D	1.82806	0.00194637
BnaA01g37370D	1.82876	0.0358848
BnaA04g13890D	1.83316	0.0199163
BnaCnng07500D	1.83513	0.00505749
BnaC02g10080D	1.84204	0.00874085
BnaA05g35130D	1.8457	0.043273
BnaA09g41810D	1.84894	0.0273602
BnaC01g11720D	1.85476	0.0023364
BnaAnng26570D	1.85596	0.0491165
BnaC04g41630D	1.8571	0.00443771
BnaA04g28670D	1.85789	0.0203728
BnaA03g06680D	1.85837	0.00156039
BnaC04g51630D	1.86738	0.0194562
BnaC04g28590D	1.87409	0.00468257
BnaA03g38950D	1.88165	0.000632442
BnaC08g49830D	1.88381	0.0243707
BnaC01g34640D	1.88457	0.0309946
BnaA06g04140D	1.8951	0.0075588
BnaC06g24340D	1.89541	0.033818
BnaC05g14830D	1.89758	0.00394876
BnaCnng26110D	1.89906	0.00731366
BnaC03g74630D	1.9026	0.00276265
BnaC08g37940D	1.90348	0.0479316
BnaC08g13910D	1.90803	0.00120938
BnaAnng09510D	1.90838	0.026943
BnaCnng37100D	1.91837	0.00272256
BnaA10g04490D	1.91848	6.95498e-05
BnaA06g27640D	1.91931	0.0234462
BnaC05g09490D	1.91932	0.0299372
BnaC09g37170D	1.92033	0.00301297
BnaA06g11500D	1.93274	0.00956079
BnaAnng20200D	1.94358	0.0152015
BnaA09g41800D	1.94608	0.030463
BnaA04g25820D	1.94742	2.73156e-06
BnaA02g23870D	1.95008	0.0123962
BnaC07g43770D	1.95126	0.0173448
BnaA03g39380D	1.9517	0.00287603
BnaA10g11080D	1.95459	0.00655878
BnaC04g41120D	1.958	0.00166763
BnaC08g24280D	1.95991	0.0338078
BnaC04g50320D	1.96072	0.0131068
BnaA01g15250D	1.96329	0.000980525
BnaC06g36880D	1.96422	0.0032337
BnaC03g08540D	1.96659	0.00527945
BnaA09g33230D	1.96992	0.0259987
BnaA05g00940D	1.97447	0.00276265
BnaC03g45990D	1.97851	2.40952e-05
BnaC01g23810D	1.98687	0.015585
BnaC02g37450D	1.98805	0.0311291
BnaC05g10160D	1.99093	0.0107285
BnaA02g09890D	1.99326	0.0107834
BnaA09g34500D	1.99613	0.0108586
BnaA09g53000D	1.99822	0.0219403
BnaCnng37560D	2.00067	0.0272991
BnaA04g02760D	2.00225	0.00370237
BnaC03g47100D	2.00416	0.0089098
BnaA04g23950D	2.00736	0.000576152
BnaA09g12710D	2.0081	1.37581e-05
BnaC03g48070D	2.00976	0.00121587
BnaCnng49210D	2.01219	0.0297982
BnaA07g33220D	2.01344	0.0222897
BnaC01g01490D	2.01562	0.0224813
BnaC07g28230D	2.01637	0.00572605
BnaA10g12780D	2.0172	0.0420394
BnaA06g28310D	2.01815	0.0388531
BnaCnng60000D	2.02382	0.0015191
BnaA08g12770D	2.0305	0.00603151
BnaA02g26610D	2.03104	0.00338437
BnaC03g28300D	2.03362	0.0010995
BnaC06g33910D	2.0345	0.00937891
BnaCnng13410D	2.03611	0.0261393
BnaC03g76260D	2.03813	0.00345143
BnaC03g73200D	2.03964	0.00408886
BnaC09g44680D	2.04354	0.0117837
BnaA06g26390D	2.04649	0.00775455
BnaC05g19630D	2.04915	0.0437389
BnaCnng20380D	2.05096	0.00020191
BnaA03g19320D	2.05396	0.00473531
BnaA06g38800D	2.0568	0.0336956
BnaC06g32380D	2.06631	0.0447362
BnaA06g09900D	2.06852	0.00603151
BnaC08g00210D	2.07071	0.0408443
BnaA05g03050D	2.07204	0.0179333
BnaC05g13970D	2.0764	0.0484858
BnaC09g53650D	2.07768	0.00098501
BnaCnng47490D	2.07822	0.0102761
BnaA06g13430D	2.08095	0.000142478
BnaA08g16310D	2.08147	0.00963457
BnaA05g14600D	2.08542	0.0441775
BnaC08g03640D	2.08842	0.00385585
BnaC03g67810D	2.0889	0.00234241
BnaA10g14810D	2.1003	0.0137342
BnaC04g41850D	2.104	0.0128627
BnaC04g53030D	2.10635	0.00230689
BnaA05g05010D	2.11427	0.0247211
BnaA04g25550D	2.11573	0.0457202
BnaA07g18660D	2.11783	0.0140793
BnaA10g06710D	2.11887	0.000140701
BnaA05g10480D	2.12028	0.000455202
BnaC04g21970D	2.12624	0.0421047
BnaCnng62010D	2.13234	0.000179701
BnaA09g32380D	2.13637	0.0132546
BnaC04g01070D	2.14357	0.0263975
BnaC02g44850D	2.14371	0.0167438
BnaC07g40100D	2.14629	8.3694e-05
BnaC07g26660D	2.15251	0.0322002
BnaA02g28700D	2.15251	0.0314439
BnaCnng33690D	2.15524	0.000402185
BnaC04g52580D	2.15526	0.00102347
BnaA03g29700D	2.1573	0.0472036
BnaC03g10530D	2.15977	0.00190256
BnaC01g05030D	2.16518	0.00581112
BnaC08g08130D	2.16555	0.00291784
BnaA07g03740D	2.16819	0.00772221
BnaAnng40190D	2.17176	0.00060412
BnaC04g22420D	2.17866	0.0408377
BnaC07g23920D	2.17905	0.00214587
BnaC01g15700D	2.18131	0.00720663
BnaA09g40670D	2.18137	0.0127183
BnaC07g46480D	2.18864	6.64798e-09
BnaA03g14560D	2.19279	0.0301182
BnaA10g22450D	2.19974	2.60743e-05
BnaC01g19760D	2.21971	0.000786235
BnaC01g16080D	2.22381	0.0421047
BnaC05g35010D	2.23198	0.000225761
BnaC01g32420D	2.23299	0.0435737
BnaC07g28040D	2.23606	0.0105374
BnaA07g16960D	2.23706	0.0002951
BnaC03g08040D	2.23795	0.0273717
BnaC04g53580D	2.23954	0.00276265
BnaC03g59270D	2.2447	0.00379808
BnaC03g73550D	2.24722	0.0138491
BnaA08g22690D	2.25377	0.0452791
BnaA08g18790D	2.2569	0.0261909
BnaA01g24820D	2.26364	0.000374297
BnaCnng18810D	2.26378	0.00928003
BnaA03g00260D	2.26593	8.44187e-05
BnaA06g25550D	2.27651	0.00133199
BnaA05g29500D	2.27747	0.0101236
BnaC02g25740D	2.28147	0.018814
BnaC03g12400D	2.28388	0.00596005
BnaA01g31850D	2.2845	0.00141761
BnaC01g06260D	2.28865	0.00440527
BnaC02g39460D	2.29388	0.0229325
BnaC05g51340D	2.2989	0.0459958
BnaC04g53550D	2.29909	0.00146017
BnaC01g26220D	2.29938	0.0330736
BnaAnng14080D	2.30724	0.013821
BnaC02g11110D	2.31211	0.0127428
BnaC05g43850D	2.314	0.000555999
BnaC06g30570D	2.31676	0.0100399
BnaA01g26030D	2.31769	0.0217759
BnaC04g53560D	2.31786	0.00242572
BnaC03g58870D	2.32483	0.0232243
BnaC03g04830D	2.32996	0.000874501
BnaA06g22040D	2.33349	0.00108754
BnaC05g42570D	2.33816	2.86911e-06
BnaC04g40550D	2.33922	0.0013918
BnaA06g23380D	2.34152	0.0407189
BnaA03g22360D	2.3485	0.00243101
BnaC04g11470D	2.35497	1.73425e-05
BnaA09g43030D	2.35668	0.00014173
BnaA04g00600D	2.35776	0.0216889
BnaA05g03420D	2.36357	0.00102347
BnaA02g36690D	2.36496	0.00530755
BnaA05g00710D	2.36505	0.0279052
BnaC03g24530D	2.37039	0.0315336
BnaA02g09960D	2.37044	0.0429183
BnaCnng44030D	2.3739	0.0163353
BnaA07g15180D	2.3828	0.000292423
BnaC08g26910D	2.38785	0.0196397
BnaA05g28580D	2.39028	0.0201004
BnaC08g13970D	2.39561	0.0129275
BnaC04g52400D	2.40319	0.00280383
BnaC08g21320D	2.4043	0.0274186
BnaA05g03080D	2.40638	0.00647619
BnaC08g48860D	2.41894	0.0437389
BnaA07g30430D	2.42003	0.000612364
BnaA02g08010D	2.42021	0.0146472
BnaC05g14970D	2.42293	3.72845e-05
BnaC05g06710D	2.4293	0.000806084
BnaA09g18440D	2.43038	0.000129095
BnaCnng09850D	2.43336	0.00974312
BnaC08g30370D	2.44114	0.0325063
BnaA09g47670D	2.44538	0.00270141
BnaA09g34030D	2.44605	0.00492914
BnaA03g11410D	2.44615	8.31032e-07
BnaC08g49040D	2.44659	0.00168291
BnaCnng27210D	2.45323	0.0109409
BnaAnng11680D	2.45515	0.00386011
BnaC05g43490D	2.45538	0.00111455
BnaC03g49920D	2.45561	0.000590537
BnaA03g39660D	2.46207	0.000364816
BnaA07g08220D	2.46485	0.0114212
BnaC02g35940D	2.49768	9.02447e-05
BnaA06g38950D	2.49802	0.0443224
BnaC08g02890D	2.50706	0.0493657
BnaC01g18020D	2.50795	6.66565e-05
BnaC03g52730D	2.5088	0.0437389
BnaC09g40960D	2.50956	0.00250312
BnaA06g32320D	2.51007	0.0206072
BnaA07g33240D	2.51042	0.0366329
BnaC04g26730D	2.51892	0.0133967
BnaCnng37450D	2.52412	0.000605131
BnaC01g07420D	2.52657	0.012732
BnaA04g17560D	2.53714	7.0161e-05
BnaA02g19730D	2.53978	0.00470203
BnaA01g00920D	2.54604	0.0203098
BnaC03g78230D	2.54731	0.000511622
BnaC03g45280D	2.55011	1.648e-05
BnaA03g14580D	2.5584	0.00160418
BnaC06g30030D	2.56057	0.0440522
BnaA08g08740D	2.5615	0.0427939
BnaAnng26200D	2.56845	7.0161e-05
BnaC03g00160D	2.57132	3.88046e-06
BnaA06g30050D	2.57146	0.0307415
BnaC04g02270D	2.57215	0.00146017
BnaA07g27940D	2.57608	0.000758131
BnaA08g23150D	2.57805	0.00683654
BnaA01g20660D	2.58714	0.00027805
BnaA07g23700D	2.59615	0.00450053
BnaA06g32640D	2.59746	6.89673e-05
BnaAnng13010D	2.60463	0.0441565
BnaA07g32420D	2.60721	2.45676e-05
BnaA01g36810D	2.60778	0.00152065
BnaCnng72260D	2.61102	0.0478489
BnaC07g13050D	2.6133	0.0335177
BnaA08g00900D	2.61674	0.000225761
BnaC08g35060D	2.64639	0.0118467
BnaA02g29540D	2.64675	0.0101751
BnaA06g05280D	2.64683	2.56662e-06
BnaC01g20120D	2.64816	0.00351725
BnaCnng02630D	2.64986	0.0268741
BnaA09g27040D	2.66028	0.0119142
BnaA04g04420D	2.6614	0.0176299
BnaC06g38360D	2.66339	0.015638
BnaA07g04700D	2.66435	0.0107503
BnaA08g31050D	2.6733	0.00115482
BnaA02g04990D	2.67447	0.0105227
BnaC06g34210D	2.67641	9.11289e-06
BnaC03g52390D	2.6772	0.00674439
BnaC03g58370D	2.67806	0.0122178
BnaC07g18010D	2.6862	0.000123345
BnaC06g38510D	2.68762	0.000991659
BnaC03g34940D	2.69383	0.0160467
BnaC06g22070D	2.69579	0.0152451
BnaC05g45940D	2.69834	0.00509964
BnaA03g28770D	2.7096	3.75181e-05
BnaC07g11320D	2.70976	0.00137432
BnaC09g17270D	2.71585	7.56581e-06
BnaA05g27660D	2.71706	1.29354e-06
BnaA05g00280D	2.71788	0.00030262
BnaC08g17880D	2.71879	0.0221498
BnaC07g49920D	2.72101	0.0205067
BnaA05g33880D	2.72116	0.0450615
BnaA04g23730D	2.72797	0.00178001
BnaC09g42430D	2.73185	0.00703959
BnaC06g23720D	2.73947	0.047048
BnaA06g30810D	2.74812	0.00394789
BnaC03g23130D	2.75405	0.000583386
BnaA02g13370D	2.75563	0.000183887
BnaCnng29630D	2.75918	0.00218251
BnaCnng07700D	2.76225	0.00159932
BnaC03g27140D	2.76395	0.00211609
BnaA03g56880D	2.76954	0.00720663
BnaC03g62490D	2.77645	0.0138784
BnaA03g26220D	2.77767	7.73584e-14
BnaA01g29130D	2.77794	0.00500123
BnaA09g52260D	2.78132	0.00792037
BnaCnng62240D	2.78284	0.0215466
BnaAnng13720D	2.80033	0.00354591
BnaA03g04310D	2.81468	6.95623e-07
BnaC08g37780D	2.82092	0.00106547
BnaC03g08550D	2.82329	7.18809e-06
BnaA06g31640D	2.83428	0.0171084
BnaC07g26280D	2.83986	0.000310982
BnaA01g07090D	2.84867	0.0450694
BnaA01g27800D	2.84948	0.00250499
BnaA01g16530D	2.85244	0.00640922
BnaC08g27710D	2.85431	0.0125071
BnaA10g24080D	2.85881	0.0277349
BnaC09g20370D	2.86368	0.00134221
BnaA07g17230D	2.87366	1.7218e-08
BnaC07g41210D	2.87985	0.00674439
BnaA06g01060D	2.88829	1.08684e-05
BnaC01g19550D	2.89247	0.00338437
BnaA03g50170D	2.89373	0.00941728
BnaC04g24860D	2.89383	0.0119142
BnaA04g04400D	2.89617	0.00523392
BnaC05g43080D	2.90121	0.00278727
BnaAnng10090D	2.90209	0.00127478
BnaC09g29340D	2.90517	0.00873238
BnaC05g14810D	2.90527	2.55612e-05
BnaA04g15010D	2.90612	0.0246033
BnaA06g15780D	2.91732	0.0292691
BnaA10g18700D	2.92552	0.0202649
BnaC08g31770D	2.92818	0.0456448
BnaC09g13410D	2.93983	0.0117933
BnaC07g42640D	2.93998	0.00211359
BnaA06g15030D	2.94099	1.04855e-06
BnaA03g17400D	2.9469	0.0335177
BnaCnng62150D	2.94838	0.000202182
BnaA08g09100D	2.95177	0.000145361
BnaC04g06760D	2.95592	0.0495564
BnaA03g40200D	2.95917	0.0152015
BnaA07g21130D	2.96315	1.67638e-06
BnaA06g12890D	2.96476	0.0135969
BnaA01g17170D	2.96801	6.89673e-05
BnaC01g19520D	2.97505	0.00905975
BnaA09g41660D	2.9826	0.0329303
BnaC04g18440D	2.98373	0.00425619
BnaAnng01320D	2.98672	0.0136079
BnaC05g12870D	3.01861	0.0152015
BnaC03g17600D	3.03953	0.00949944
BnaC01g00680D	3.04167	0.0488762
BnaA10g26700D	3.04338	0.00942102
BnaC03g24360D	3.04597	0.0027203
BnaC08g25440D	3.05302	0.000525132
BnaC06g24500D	3.06122	0.00720029
BnaC07g27620D	3.06211	0.00354074
BnaA01g16400D	3.06752	0.0119462
BnaA09g42610D	3.07139	0.0150663
BnaA08g06880D	3.07967	0.0134299
BnaA09g46240D	3.08029	6.25537e-06
BnaA06g02010D	3.08354	0.026112
BnaC06g05090D	3.08907	0.00329969
BnaA03g49190D	3.09018	0.000240265
BnaC06g22120D	3.09476	0.00654208
BnaC07g20310D	3.09812	0.00157069
BnaC02g40580D	3.101	0.00224714
BnaA03g22400D	3.10528	0.0160467
BnaA02g03980D	3.10876	0.000284588
BnaA03g03400D	3.11231	4.42417e-06
BnaA05g20100D	3.11442	0.000225782
BnaA08g22720D	3.11723	0.000516483
BnaC02g26030D	3.12177	8.9259e-05
BnaCnng37520D	3.12304	0.0195489
BnaA03g40990D	3.12421	0.0273744
BnaC02g43120D	3.13426	0.00719035
BnaC06g34340D	3.13889	0.00539146
BnaC07g49220D	3.15275	0.0495922
BnaA07g26660D	3.15439	0.0211366
BnaC07g50320D	3.15532	0.000141691
BnaA09g55500D	3.15738	0.0116307
BnaC05g15180D	3.16831	0.000129095
BnaC03g33890D	3.17245	7.3185e-07
BnaA05g29010D	3.17533	0.000189496
BnaA08g26000D	3.17621	0.000883034
BnaA05g34880D	3.17642	0.00115432
BnaC03g58080D	3.18251	0.00228327
BnaAnng30320D	3.19275	0.00467966
BnaC08g13980D	3.195	0.00230689
BnaA05g30920D	3.19604	0.0216186
BnaA07g28390D	3.19825	9.28002e-05
BnaC01g01940D	3.20203	0.000646523
BnaA07g08930D	3.21685	0.000989179
BnaA05g20490D	3.22275	0.00133199
BnaC03g20060D	3.22541	6.60141e-15
BnaA06g38470D	3.22652	0.000111657
BnaC04g37950D	3.2292	0.0175414
BnaA04g27560D	3.23509	0.00435419
BnaC06g04380D	3.23741	0.000140586
BnaC03g17740D	3.25168	0.0219165
BnaCnng20480D	3.25484	0.00360838
BnaC08g06690D	3.25504	0.000502153
BnaC07g08850D	3.26697	5.34036e-07
BnaA05g02510D	3.26767	0.00306588
BnaA07g38000D	3.27256	0.0426223
BnaC09g23130D	3.27881	0.000622684
BnaC05g09910D	3.28791	0.0061472
BnaA05g12950D	3.28923	0.000201078
BnaAnng29350D	3.29168	4.53714e-05
BnaA07g30760D	3.29174	1.77937e-08
BnaA03g20340D	3.29273	0.001441
BnaC01g15760D	3.30036	0.00073395
BnaC05g46390D	3.30761	0.00792165
BnaA09g28510D	3.30894	0.0403563
BnaC02g35140D	3.31235	0.000619672
BnaA03g22350D	3.31995	0.000102422
BnaA10g15190D	3.32207	0.0175354
BnaA03g25580D	3.32751	6.75918e-05
BnaA09g33460D	3.32888	8.517e-06
BnaC01g40890D	3.3302	1.33642e-05
BnaC04g19890D	3.33074	0.000991659
BnaC03g45140D	3.33128	0.000362602
BnaC07g21340D	3.33854	4.33354e-05
BnaC02g37620D	3.34533	0.00380748
BnaA09g44300D	3.34719	0.00505046
BnaA05g28630D	3.36958	0.00524865
BnaAnng20740D	3.37135	0.000142291
BnaC03g61120D	3.38075	2.95473e-05
BnaA10g25710D	3.39273	0.04745
BnaC05g50160D	3.39511	0.00144219
BnaC05g09770D	3.40378	0.0232184
BnaA03g08280D	3.40487	0.0143726
BnaC08g26260D	3.417	0.0351801
BnaC03g49940D	3.4301	0.00258821
BnaC05g27530D	3.43907	2.58605e-05
BnaC05g03430D	3.44377	2.37414e-05
BnaC04g15750D	3.45165	0.0218793
BnaC09g35160D	3.45461	0.00621481
BnaA05g21090D	3.47107	1.18199e-12
BnaA03g35310D	3.47875	0.000618829
BnaC04g38330D	3.47896	0.000269617
BnaC03g24900D	3.48145	0.00397182
BnaA03g38280D	3.48244	0.0119108
BnaA01g00900D	3.48256	2.56662e-06
BnaC05g41510D	3.48854	0.0146503
BnaC05g41830D	3.49652	2.86808e-10
BnaC07g25470D	3.49683	0.00163393
BnaC05g38410D	3.50361	0.0297639
BnaC04g07710D	3.5102	0.0182456
BnaCnng56610D	3.52428	0.0309796
BnaC06g32660D	3.54762	0.00513622
BnaA04g24650D	3.55048	0.0489359
BnaAnng17910D	3.55191	3.72452e-06
BnaC05g21480D	3.56719	3.52531e-05
BnaA06g21470D	3.57437	0.00151125
BnaC05g31460D	3.58517	2.06548e-06
BnaC04g52100D	3.58648	0.00470523
BnaA01g06490D	3.59632	3.83195e-05
BnaA06g23230D	3.60515	0.00115432
BnaA06g13410D	3.6084	3.94053e-09
BnaA06g30390D	3.61276	0.000152947
BnaC03g17730D	3.61325	0.0493657
BnaC03g06000D	3.63105	0.00306907
BnaA09g32110D	3.63746	0.020811
BnaA07g27170D	3.64274	0.0307415
BnaC09g16820D	3.65278	0.00747725
BnaC03g77680D	3.65512	0.0105171
BnaA06g15800D	3.66399	0.00564203
BnaC03g39000D	3.66868	0.00948067
BnaA03g44340D	3.68474	0.0296077
BnaA05g01350D	3.68628	8.80206e-05
BnaA02g34140D	3.70665	0.0183115
BnaC06g43940D	3.71124	0.0126289
BnaC03g72040D	3.71386	1.94594e-06
BnaA01g06180D	3.71759	9.63216e-07
BnaC03g52080D	3.72209	0.000815987
BnaAnng03380D	3.72343	0.0240429
BnaA06g13920D	3.72874	0.0162933
BnaC03g59660D	3.73859	5.22776e-06
BnaA06g34450D	3.73939	0.000280412
BnaC06g17590D	3.74283	0.00038565
BnaC04g45790D	3.74726	0.0316656
BnaC01g07450D	3.7495	2.5922e-06
BnaA05g31800D	3.75427	0.000615425
BnaA03g40940D	3.75743	1.32506e-09
BnaA10g19510D	3.76302	0.0235514
BnaC02g09390D	3.77619	0.000144045
BnaCnng47950D	3.78794	0.0293449
BnaC06g05930D	3.79029	4.16816e-17
BnaA05g01190D	3.80523	1.30121e-09
BnaA02g34210D	3.8069	0.000289851
BnaC06g12160D	3.81146	0.0064204
BnaC02g46640D	3.84648	4.26614e-06
BnaA04g29550D	3.86097	1.22055e-06
BnaC07g15380D	3.8985	6.86326e-06
BnaAnng04520D	3.90631	1.04855e-06
BnaA06g13270D	3.91238	0.0134676
BnaA05g10200D	3.9149	0.00626338
BnaAnng23990D	3.9269	7.94122e-05
BnaA09g53100D	3.9302	0.00345143
BnaA07g27260D	3.93337	0.0081314
BnaA07g18900D	3.93764	0.0016283
BnaC04g36020D	3.954	2.56662e-06
BnaA02g05510D	3.95838	5.10341e-05
BnaC02g13860D	3.97788	9.90226e-06
BnaC05g33960D	3.98923	2.15768e-13
BnaC08g07690D	4.00372	0.00203043
BnaC03g69420D	4.01077	0.0126289
BnaC04g39750D	4.07398	5.11652e-07
BnaC05g14940D	4.07893	0.00566574
BnaC04g40810D	4.07994	3.36644e-08
BnaC07g49750D	4.08852	0.00280372
BnaA09g54170D	4.0905	0.0448228
BnaCnng63660D	4.0973	2.04967e-06
BnaA07g35920D	4.10523	7.89802e-10
BnaC03g34410D	4.11275	3.97713e-05
BnaA07g16450D	4.13128	8.517e-06
BnaC02g13250D	4.13243	0.0139
BnaAnng34010D	4.15138	0.0351801
BnaC03g72390D	4.16453	2.20929e-06
BnaC07g20690D	4.17079	0.0144817
BnaC04g00750D	4.19081	3.81715e-16
BnaA06g24600D	4.20282	0.000122529
BnaCnng30450D	4.20422	2.64694e-06
BnaC01g07710D	4.22643	8.517e-06
BnaA03g14700D	4.23678	0.0306648
BnaC05g06260D	4.26114	0.00147428
BnaC05g26170D	4.27311	0.00245614
BnaA02g09030D	4.27371	2.44455e-09
BnaC07g36050D	4.29158	0.00167628
BnaC05g00780D	4.30471	0.0400981
BnaA03g60000D	4.3073	0.0221692
BnaC07g35800D	4.30753	0.00345143
BnaA06g39340D	4.32705	6.34939e-05
BnaA09g02630D	4.34539	0.000410509
BnaC02g23290D	4.35525	6.80818e-07
BnaC07g12870D	4.35673	0.000231358
BnaC06g06420D	4.37714	9.19469e-12
BnaCnng63180D	4.41452	1.09898e-05
BnaA01g09200D	4.43281	4.72031e-07
BnaA02g31990D	4.43861	0.00263631
BnaA07g11450D	4.44564	9.62065e-09
BnaC08g36840D	4.44771	6.90927e-05
BnaC08g13040D	4.45415	3.49212e-06
BnaA06g00850D	4.4779	2.56196e-08
BnaC05g01260D	4.49582	0.0421521
BnaC02g42410D	4.49875	0.000588873
BnaC09g40440D	4.52448	0.00602034
BnaA06g13250D	4.52746	0.00128249
BnaC09g37560D	4.53132	7.95728e-05
BnaA02g25550D	4.58978	7.47416e-06
BnaA08g18690D	4.60438	0.0408225
BnaC04g31630D	4.60848	3.26372e-05
BnaA03g02060D	4.61366	0.0368639
BnaA04g17200D	4.62955	6.35079e-05
BnaC06g15360D	4.63114	1.1004e-05
BnaC06g31940D	4.63543	2.56662e-06
BnaC02g33350D	4.64659	8.15926e-08
BnaA09g35800D	4.67085	0.0358654
BnaC09g42490D	4.6762	0.0423814
BnaA02g01300D	4.67774	0.0442664
BnaA10g17250D	4.69528	2.57666e-05
BnaA08g03050D	4.69908	3.64512e-06
BnaA03g24900D	4.72678	0.00921194
BnaA03g13640D	4.74117	0.000256203
BnaA07g17220D	4.75743	8.01813e-07
BnaC08g38140D	4.77371	0.00161231
BnaC09g08130D	4.77553	1.94186e-11
BnaCnng19590D	4.77579	0.0317823
BnaC04g22390D	4.78846	0.0256814
BnaC07g29150D	4.79714	7.64555e-05
BnaA01g34980D	4.80314	3.87909e-14
BnaC07g25850D	4.81352	2.66435e-07
BnaA03g42880D	4.82211	0.000192005
BnaA08g17540D	4.82794	0.0261909
BnaC04g09800D	4.83003	0.041212
BnaA08g06260D	4.83166	1.50323e-08
BnaA08g18380D	4.83189	1.21059e-06
BnaA09g54980D	4.83739	0.00953972
BnaC01g01500D	4.85147	1.22573e-07
BnaA10g01100D	4.86117	0.0146503
BnaC06g22140D	4.8709	0.0220196
BnaA09g17070D	4.8721	0.0210505
BnaC07g39210D	4.87291	4.79872e-05
BnaA02g16460D	4.88167	7.64712e-05
BnaA05g20480D	4.88959	0.00218251
BnaA06g02490D	4.91843	0.028993
BnaCnng52180D	4.91967	0.0232184
BnaA03g13650D	4.94748	0.000188584
BnaA10g07120D	5.02136	6.86326e-06
BnaA04g04450D	5.03868	0.000144045
BnaA09g15260D	5.0397	8.52785e-05
BnaC03g72930D	5.0465	0.00214221
BnaA01g03680D	5.07854	2.40114e-06
BnaC04g50970D	5.08257	2.4767e-12
BnaC03g36390D	5.08673	0.0270659
BnaA05g12330D	5.09377	5.69063e-06
BnaA03g04460D	5.09535	0.0290606
BnaA01g11760D	5.11764	3.65118e-21
BnaA03g20840D	5.11953	4.8845e-06
BnaA02g35330D	5.16214	0.0228035
BnaC05g46300D	5.16907	0.0426223
BnaA03g02070D	5.1694	0.0426223
BnaA07g28880D	5.17929	2.28115e-06
BnaA09g27660D	5.21638	0.000943267
BnaC05g47870D	5.23391	0.000149875
BnaC05g14950D	5.23469	6.63904e-10
BnaC04g14780D	5.2521	5.45681e-06
BnaA04g15600D	5.28115	0.0126729
BnaA08g01300D	5.29705	0.00550523
BnaC05g15780D	5.29714	1.09932e-10
BnaC04g25500D	5.32072	7.24587e-06
BnaC08g17850D	5.40377	5.18855e-08
BnaC02g05930D	5.41374	0.00954121
BnaC04g38620D	5.42234	0.00111813
BnaA03g38060D	5.42911	0.00108399
BnaA02g22470D	5.45365	1.52639e-07
BnaA02g10970D	5.45964	2.14869e-08
BnaC08g20260D	5.50969	0.0202046
BnaA08g17380D	5.527	5.34036e-07
BnaA06g10010D	5.54877	4.15593e-06
BnaA08g09690D	5.55151	0.000199306
BnaA03g00790D	5.56296	0.00592674
BnaC07g49330D	5.56577	0.0035047
BnaC02g22250D	5.58957	3.0417e-05
BnaC03g19520D	5.63403	0.0156351
BnaC07g20360D	5.64614	0.00250701
BnaA02g35250D	5.65957	0.00378719
BnaC07g44090D	5.68234	0.000149875
BnaAnng21860D	5.69552	0.0208577
BnaA09g20840D	5.70689	0.000341859
BnaA03g16250D	5.73712	0.0261609
BnaC02g38400D	5.74289	1.41306e-10
BnaA07g36440D	5.75028	0.000991659
BnaA10g14100D	5.79495	0.000538503
BnaA10g11500D	5.80995	0.00301491
BnaC01g08560D	5.82107	0.00377701
BnaA10g01170D	5.8278	3.69973e-10
BnaA09g05190D	5.83482	0.00438748
BnaC03g15510D	5.83514	0.00410175
BnaC09g37480D	5.8784	0.0108047
BnaA03g33540D	5.8798	0.0026737
BnaA10g16170D	5.92971	0.00484735
BnaA09g33210D	5.971	0.0045045
BnaC05g37530D	5.97669	1.35171e-09
BnaA02g19970D	6.02694	2.1741e-11
BnaC07g32490D	6.0533	0.00371621
BnaAnng34290D	6.05787	0.00808884
BnaA06g18900D	6.08779	0.0104246
BnaC06g20260D	6.08887	0.00675043
BnaA04g22080D	6.10157	6.27414e-07
BnaA02g09200D	6.11767	0.00106363
BnaC04g45800D	6.14314	1.41771e-06
BnaCnng06770D	6.1533	4.1512e-08
BnaC05g33160D	6.15999	0.0346302
BnaC05g12590D	6.16417	0.00346498
BnaA07g24330D	6.20151	0.00203773
BnaAnng35040D	6.23907	0.00208606
BnaC09g34350D	6.24135	0.00161276
BnaA02g33450D	6.24624	0.00619909
BnaCnng42990D	6.25091	1.88454e-12
BnaC09g32750D	6.25329	0.0273441
BnaA10g15140D	6.27138	0.00401565
BnaCnng27850D	6.27385	6.93475e-13
BnaCnng27950D	6.27784	0.00337675
BnaC05g44620D	6.34161	0.000755944
BnaAnng06500D	6.34766	2.73156e-06
BnaC03g67980D	6.35201	1.52409e-08
BnaA02g07110D	6.35559	9.81066e-11
BnaA03g57970D	6.37582	0.00160393
BnaA06g33900D	6.43383	0.000292038
BnaAnng23050D	6.46217	3.28844e-05
BnaA06g32290D	6.47181	0.000362602
BnaC04g26710D	6.49043	0.000106059
BnaC04g05620D	6.52082	1.03138e-17
BnaA10g02480D	6.5224	0.00108399
BnaC04g02250D	6.5823	0.00135216
BnaC02g15280D	6.58478	0.00156194
BnaA09g07980D	6.59637	4.30092e-15
BnaA05g12980D	6.60737	0.00338437
BnaC03g12050D	6.68776	0.00209621
BnaC06g19560D	6.69645	0.00225051
BnaC07g11810D	6.71285	0.000650771
BnaA03g12660D	6.76373	0.000169465
BnaC04g39030D	6.76781	0.000400973
BnaC09g30230D	6.78713	9.19469e-12
BnaA03g58070D	6.78891	0.000802836
BnaA02g02530D	6.79481	0.00090593
BnaC03g16540D	6.84858	0.000144045
BnaA04g03610D	6.86557	0.000839462
BnaA05g05760D	6.87712	1.00482e-11
BnaA10g12140D	6.88965	0.000109869
BnaA02g10980D	6.91514	5.70484e-06
BnaCnng63310D	6.93888	0.0383859
BnaA05g16130D	6.93921	1.18131e-05
BnaC08g07490D	6.94972	0.000371412
BnaC03g27400D	7.03167	0.000455509
BnaC02g15270D	7.10831	9.27319e-07
BnaC06g25430D	7.14785	7.3579e-05
BnaA03g13140D	7.1552	1.10531e-12
BnaC01g21280D	7.27571	7.4372e-05
BnaC05g11630D	7.29851	5.92589e-07
BnaCnng42980D	7.31189	0.0043067
BnaA04g09400D	7.45592	2.7488e-05
BnaC04g07720D	7.78139	0.0265355
BnaA07g08700D	7.9143	5.93143e-06
BnaA06g11320D	7.94732	3.72486e-06
BnaCnng09200D	8.18192	0.00603151
BnaA05g06860D	9.1697	0.00674439
BnaC02g45160D	10.7145	1.07071e-12

## Sheet: S3
Gene ID	log2(FoldChange)	FDR
BnaC09g41340D	-8.61294	4.35381e-09
BnaC04g33320D	-8.44834	7.49544e-08
BnaA04g00240D	-8.3047	3.13418e-08
BnaC02g06690D	-8.22929	7.29147e-08
BnaA09g49730D	-7.56675	8.74251e-07
BnaA09g02120D	-7.26622	7.3387e-27
BnaAnng14710D	-7.19608	6.3174e-06
BnaC05g08180D	-7.09724	6.34314e-06
BnaA04g28480D	-7.03517	7.36463e-06
BnaA10g17910D	-6.88722	0.000108677
BnaA06g06530D	-6.83893	4.79872e-05
BnaC02g19720D	-6.80474	3.00924e-05
BnaA07g30160D	-6.7908	4.53714e-05
BnaCnng57420D	-6.74248	4.62295e-13
BnaC06g01800D	-6.69696	0.000210658
BnaC06g01430D	-6.62111	0.000260711
BnaC05g17950D	-6.6204	0.000265245
BnaC06g23520D	-6.56989	0.00161005
BnaC08g44980D	-6.53473	0.000275697
BnaC04g23060D	-6.51764	0.000382144
BnaA09g00200D	-6.41133	1.88344e-07
BnaA03g19030D	-6.3296	0.000860141
BnaA02g14780D	-6.26144	0.00064234
BnaC07g14830D	-6.23234	0.000149875
BnaC07g03450D	-6.23223	2.89056e-07
BnaA05g07300D	-6.19838	2.29893e-14
BnaC06g33610D	-6.19386	0.0006196
BnaC07g17120D	-6.18574	0.00145586
BnaA06g24820D	-6.17002	4.62295e-13
BnaC06g24160D	-6.16489	0.000321676
BnaA02g36790D	-6.16102	0.000731558
BnaA03g00750D	-6.12561	0.00117862
BnaA01g27400D	-6.12076	0.00487886
BnaA09g30450D	-6.08628	0.000798253
BnaC05g45750D	-6.07095	1.93388e-09
BnaA06g14220D	-6.04626	0.00103521
BnaC05g15590D	-6.04623	0.00107863
BnaA05g09400D	-6.04485	2.47061e-42
BnaC04g51100D	-6.04396	0.00440527
BnaA06g25320D	-6.02041	5.93083e-07
BnaA08g14630D	-6.01084	0.00200349
BnaA03g37990D	-5.98574	1.39217e-27
BnaA09g41130D	-5.97053	0.00146664
BnaA09g31270D	-5.96999	0.00163393
BnaA04g29300D	-5.9227	0.00541821
BnaA02g03140D	-5.91244	5.40443e-07
BnaA07g02010D	-5.86673	1.66701e-08
BnaA09g41920D	-5.85977	0.0001411
BnaA02g28130D	-5.84053	5.94269e-05
BnaC08g22010D	-5.83294	0.000984935
BnaA02g35730D	-5.6962	0.00366447
BnaC04g42410D	-5.6912	0.0122154
BnaC04g10770D	-5.65981	1.13925e-36
BnaC08g12880D	-5.65514	0.00149728
BnaC09g17950D	-5.64135	0.0117208
BnaA04g05520D	-5.62884	0.00224809
BnaC02g12030D	-5.6205	6.83825e-08
BnaA02g14340D	-5.59687	0.0165317
BnaC02g37040D	-5.52526	1.80697e-11
BnaC09g28080D	-5.44777	0.000618172
BnaC02g36210D	-5.41736	3.98604e-06
BnaC01g35210D	-5.41095	0.00488662
BnaC04g56560D	-5.4067	0.000341363
BnaC05g11730D	-5.40656	0.00775455
BnaC04g40710D	-5.36994	0.00410175
BnaA05g09410D	-5.3635	9.07799e-30
BnaC03g44110D	-5.32844	2.64327e-27
BnaA02g29010D	-5.32246	3.85619e-10
BnaC08g15350D	-5.27475	0.0144293
BnaAnng22640D	-5.23497	1.0271e-10
BnaA09g35750D	-5.19239	0.0261609
BnaA04g21960D	-5.18927	5.34036e-07
BnaA09g28910D	-5.16777	0.0151925
BnaC07g17710D	-5.16676	2.37532e-17
BnaC08g15370D	-5.16427	0.0127428
BnaA07g30320D	-5.12956	2.98589e-17
BnaC02g10170D	-5.09228	0.00111078
BnaA03g04030D	-5.08192	3.32184e-06
BnaA05g34820D	-5.05114	0.0144925
BnaC07g23630D	-5.04331	4.13841e-06
BnaA01g28200D	-5.03713	3.35759e-07
BnaAnng16590D	-5.02454	0.00108399
BnaA02g12210D	-5.01141	0.0209969
BnaA01g27380D	-5.00433	0.0257632
BnaC01g06980D	-5.00151	0.0152606
BnaC07g47570D	-4.97161	1.31507e-05
BnaC03g17930D	-4.96392	0.0112711
BnaC04g46000D	-4.92276	0.0139721
BnaA06g01980D	-4.92029	5.86028e-05
BnaCnng46790D	-4.91339	2.10501e-19
BnaC02g05530D	-4.90815	0.00394503
BnaC01g37020D	-4.87913	1.43741e-05
BnaC05g19580D	-4.87194	0.0277016
BnaA01g27680D	-4.8005	0.00354189
BnaC09g04380D	-4.7865	0.00467855
BnaC08g18570D	-4.78365	0.0180672
BnaC03g24250D	-4.78124	0.020255
BnaA09g06030D	-4.7195	6.9416e-09
BnaA06g36250D	-4.71738	5.34036e-07
BnaC04g08100D	-4.70164	7.92214e-16
BnaA07g10140D	-4.65647	0.00556783
BnaA01g11670D	-4.62847	0.0310939
BnaA10g23470D	-4.62718	0.0422405
BnaA01g09900D	-4.5905	1.19313e-28
BnaA07g14420D	-4.57791	4.04453e-08
BnaA06g37520D	-4.56882	0.00751578
BnaA08g07510D	-4.55281	8.28693e-05
BnaC07g50020D	-4.5488	0.00125381
BnaC09g05590D	-4.48384	1.32506e-09
BnaC07g13200D	-4.48114	9.02163e-25
BnaA02g13410D	-4.4799	0.00102347
BnaC01g11550D	-4.4712	1.09712e-18
BnaA06g23720D	-4.44641	3.88046e-06
BnaA04g16900D	-4.43801	0.0098262
BnaC08g27250D	-4.43564	0.00789281
BnaCnng65540D	-4.40047	0.00178001
BnaC09g29440D	-4.37947	0.000179701
BnaAnng24130D	-4.36002	3.61172e-13
BnaC03g12120D	-4.33795	0.012829
BnaA01g16330D	-4.32652	4.42417e-06
BnaA04g24790D	-4.32209	0.00020371
BnaC08g11070D	-4.30134	2.17375e-05
BnaA03g18710D	-4.2922	2.66293e-12
BnaC05g16720D	-4.2789	0.0016982
BnaC05g10480D	-4.25579	4.97556e-09
BnaC04g14990D	-4.24905	5.43195e-09
BnaC08g41560D	-4.23445	0.00931498
BnaA07g19820D	-4.2324	0.0232184
BnaC02g12730D	-4.22909	0.000364669
BnaA01g37210D	-4.22755	0.00012722
BnaA03g17720D	-4.2266	0.0233918
BnaC02g11770D	-4.22578	0.0268635
BnaA03g21210D	-4.18925	5.84187e-07
BnaAnng12370D	-4.18893	0.0180672
BnaC06g35410D	-4.18377	3.00057e-11
BnaA02g17670D	-4.17995	0.00583399
BnaA03g15830D	-4.17913	3.87909e-14
BnaC04g05700D	-4.17653	1.19642e-07
BnaA05g08710D	-4.15234	2.40094e-06
BnaA05g34950D	-4.15096	0.0198579
BnaA10g01410D	-4.14887	0.000166171
BnaC08g35830D	-4.14543	0.045655
BnaC02g44900D	-4.13212	1.26087e-08
BnaAnng36210D	-4.11028	1.0271e-10
BnaA04g27920D	-4.10768	4.51541e-11
BnaC07g13290D	-4.10161	0.00674439
BnaC03g47950D	-4.07344	2.38998e-05
BnaA09g05760D	-4.07337	3.67686e-09
BnaC07g24660D	-4.0728	2.65867e-13
BnaA09g34300D	-4.07084	0.0300437
BnaA02g27490D	-4.07002	0.0253602
BnaC08g44590D	-4.0648	0.033818
BnaC06g20190D	-4.05467	3.48762e-05
BnaA02g07210D	-4.03798	0.000112518
BnaC03g48750D	-4.02347	0.0310939
BnaA09g20120D	-4.01579	6.10002e-06
BnaC07g18140D	-3.98865	0.00128249
BnaC05g20350D	-3.98523	0.0467673
BnaC02g08600D	-3.97988	0.00178792
BnaC09g38420D	-3.97984	0.0423814
BnaC09g30700D	-3.96529	4.69744e-17
BnaA09g47380D	-3.96356	0.00662278
BnaAnng22720D	-3.95629	3.07528e-05
BnaA07g31590D	-3.90003	1.13094e-10
BnaC08g08290D	-3.89894	0.000815649
BnaC06g32880D	-3.89386	0.0228072
BnaA03g16160D	-3.88922	7.55993e-05
BnaA05g31210D	-3.88718	2.26598e-07
BnaA08g13860D	-3.85908	3.35287e-05
BnaA07g18580D	-3.85547	0.00695108
BnaA08g19490D	-3.84035	0.000158225
BnaC03g60650D	-3.83995	0.0482101
BnaC05g46600D	-3.82132	0.0149241
BnaA06g37320D	-3.81959	0.00158024
BnaC03g49500D	-3.81789	8.32531e-05
BnaCnng47140D	-3.81102	0.00390509
BnaC06g15880D	-3.8101	0.0149241
BnaA04g17100D	-3.79816	0.0126289
BnaA05g33810D	-3.79798	1.58995e-05
BnaC03g25510D	-3.79655	1.95865e-12
BnaC07g13300D	-3.79095	0.0036218
BnaC02g37910D	-3.76923	0.0127125
BnaA05g07290D	-3.76419	0.00122336
BnaA03g00380D	-3.76099	1.95639e-09
BnaA10g07350D	-3.75364	5.2851e-18
BnaA10g07790D	-3.74944	0.000629665
BnaAnng38080D	-3.74087	0.00156194
BnaA09g52000D	-3.73208	7.07098e-05
BnaA08g20650D	-3.70594	0.00338437
BnaA05g15070D	-3.70367	1.94186e-11
BnaC03g48770D	-3.69478	1.03797e-10
BnaC05g48870D	-3.69054	2.40915e-05
BnaAnng00460D	-3.68925	0.0217025
BnaA03g48610D	-3.68483	0.0184613
BnaA06g31910D	-3.67907	0.0010202
BnaA09g20900D	-3.67286	0.000111182
BnaC06g15270D	-3.66644	8.6447e-05
BnaC04g34390D	-3.65394	1.31344e-09
BnaCnng59250D	-3.64134	0.0380835
BnaC04g06680D	-3.64013	0.000130043
BnaA06g32840D	-3.63708	8.44187e-05
BnaC03g72010D	-3.62704	1.55253e-05
BnaCnng63240D	-3.62224	0.00505046
BnaC03g19340D	-3.61952	3.00666e-05
BnaC03g77720D	-3.61741	4.63141e-05
BnaC02g16720D	-3.61726	0.00207049
BnaA07g33680D	-3.61595	2.04291e-05
BnaC03g10670D	-3.61056	0.0379903
BnaCnng65530D	-3.60217	0.0153657
BnaC01g25700D	-3.5936	8.40708e-06
BnaA05g27180D	-3.58841	0.0117208
BnaC01g35500D	-3.58074	6.45761e-05
BnaA07g25310D	-3.576	0.0332006
BnaA09g29590D	-3.57319	8.4672e-07
BnaC05g22880D	-3.56666	1.61488e-16
BnaC09g29430D	-3.56178	0.00294839
BnaCnng50450D	-3.5549	0.000359728
BnaC02g13600D	-3.54891	0.00692786
BnaC09g25750D	-3.537	0.0066824
BnaC03g00280D	-3.51532	6.27414e-07
BnaA04g12130D	-3.51046	6.86326e-06
BnaA07g16420D	-3.49872	0.00608079
BnaA01g33250D	-3.49564	0.000120998
BnaCnng24110D	-3.49444	0.000261959
BnaC09g23220D	-3.49227	0.0219558
BnaC04g00200D	-3.48742	0.0467792
BnaA03g24310D	-3.48696	7.54304e-05
BnaA06g26430D	-3.46938	0.0123895
BnaC01g22150D	-3.46483	0.000128358
BnaC02g17670D	-3.45146	0.000418828
BnaC03g44480D	-3.44047	0.00449066
BnaA02g02200D	-3.44024	0.00241367
BnaA06g34140D	-3.41235	0.00476969
BnaA02g20170D	-3.40273	8.88132e-05
BnaC09g21630D	-3.394	0.0446821
BnaA03g49440D	-3.38485	0.000208311
BnaC05g13310D	-3.3787	0.00116214
BnaC02g23620D	-3.37302	0.00279334
BnaCnng55860D	-3.36416	5.71946e-06
BnaA05g27440D	-3.36415	0.000215114
BnaC04g40260D	-3.3601	0.00618088
BnaA03g25130D	-3.35645	0.000153516
BnaC05g37150D	-3.35149	0.00510357
BnaC08g11270D	-3.34191	0.0260435
BnaC07g14030D	-3.34111	0.00117958
BnaA01g04000D	-3.33872	0.000113148
BnaA09g50090D	-3.33781	0.046252
BnaA04g27520D	-3.33709	0.0233918
BnaAnng20940D	-3.33498	4.24393e-07
BnaA09g51980D	-3.33265	0.0348907
BnaA03g24750D	-3.33242	0.00993721
BnaA07g18590D	-3.32708	0.00564203
BnaCnng31040D	-3.32653	0.00314161
BnaCnng15140D	-3.3189	0.000287711
BnaC08g36330D	-3.31687	4.79872e-05
BnaC07g09600D	-3.30595	0.000162416
BnaC02g02770D	-3.30353	0.0127428
BnaA03g14850D	-3.3033	0.017852
BnaC07g46160D	-3.30279	0.00373836
BnaC03g22220D	-3.30211	1.88344e-07
BnaC05g01340D	-3.29695	0.0405834
BnaA06g26980D	-3.29155	0.000174524
BnaC07g36580D	-3.28351	0.00937891
BnaC04g09850D	-3.28341	1.21281e-07
BnaA05g23950D	-3.27538	0.010877
BnaA06g03240D	-3.27449	0.0357534
BnaC03g55550D	-3.27404	0.00982459
BnaAnng19350D	-3.27371	0.0101751
BnaC03g28960D	-3.26751	6.98657e-10
BnaC02g46810D	-3.26559	2.65867e-13
BnaA06g02370D	-3.26526	0.0351801
BnaA05g27150D	-3.26143	0.00320123
BnaC09g22450D	-3.25858	0.0109192
BnaC09g26410D	-3.24724	7.89802e-10
BnaC02g39300D	-3.2431	0.00925135
BnaC04g28260D	-3.23684	0.000285947
BnaA09g33720D	-3.22895	0.00572605
BnaC02g24210D	-3.21425	0.0136738
BnaAnng15250D	-3.21416	0.000149941
BnaAnng19070D	-3.20867	0.0315103
BnaC02g31120D	-3.20588	0.00845007
BnaA05g05840D	-3.19788	0.000169465
BnaC02g00140D	-3.19721	0.0117208
BnaA01g20460D	-3.19693	9.26349e-05
BnaC02g41710D	-3.19323	0.00281057
BnaC08g49610D	-3.1902	0.00177665
BnaA03g17020D	-3.18868	0.000150018
BnaA09g34730D	-3.18798	0.00473452
BnaCnng00430D	-3.18515	1.01465e-06
BnaA03g24350D	-3.18428	1.30385e-09
BnaA07g04780D	-3.17544	0.0123745
BnaA10g08850D	-3.17135	0.0142379
BnaA05g29110D	-3.16896	0.0242107
BnaA08g01590D	-3.15741	7.31773e-14
BnaCnng32820D	-3.15242	0.0351801
BnaC03g15270D	-3.14922	0.0381288
BnaA08g02390D	-3.14837	0.0486763
BnaC04g39380D	-3.13484	0.00507944
BnaC05g37460D	-3.12856	0.000473763
BnaA05g25660D	-3.12383	0.000786183
BnaA06g15090D	-3.11759	0.0232184
BnaA08g02530D	-3.11559	3.21939e-06
BnaC06g36750D	-3.11498	2.1904e-08
BnaAnng33140D	-3.11308	2.40952e-05
BnaA01g15640D	-3.10971	8.09412e-06
BnaC02g03470D	-3.10459	0.00271193
BnaC08g09180D	-3.10397	3.91446e-08
BnaA07g04740D	-3.10328	0.000150018
BnaA06g00040D	-3.10271	0.00397182
BnaA09g26570D	-3.09887	8.61728e-08
BnaA04g26480D	-3.09268	9.24715e-05
BnaA06g06760D	-3.08593	0.000400973
BnaA09g37540D	-3.08234	7.8241e-05
BnaAnng05130D	-3.08097	7.3617e-05
BnaA04g20150D	-3.07983	8.17404e-15
BnaA02g32960D	-3.05482	0.0357055
BnaC06g21810D	-3.0482	0.00232737
BnaA02g34380D	-3.04612	0.00211609
BnaC06g05700D	-3.04607	0.0169062
BnaA07g14830D	-3.04578	0.000612364
BnaC02g43300D	-3.03705	0.00101656
BnaC08g29580D	-3.03231	6.97721e-08
BnaCnng23060D	-3.02821	0.000159224
BnaC03g55150D	-3.02193	0.00137986
BnaC05g10330D	-3.01969	0.0108394
BnaC07g24250D	-3.01333	0.0345539
BnaA01g37100D	-3.00653	0.00145409
BnaA02g22400D	-3.00528	0.0277016
BnaC04g33570D	-2.9999	0.000177303
BnaC02g42710D	-2.99848	0.00325991
BnaC01g22140D	-2.9852	0.0154554
BnaA08g04910D	-2.98334	0.0105227
BnaCnng68200D	-2.98333	0.0206181
BnaCnng06060D	-2.98323	0.00271193
BnaA06g39540D	-2.98301	0.0287474
BnaA07g38520D	-2.98258	0.00380748
BnaA06g17800D	-2.98256	0.00341211
BnaA03g19130D	-2.98135	0.0112882
BnaA04g26270D	-2.97957	1.43282e-05
BnaC07g47590D	-2.97904	0.00706849
BnaC05g49110D	-2.97827	2.56662e-06
BnaC04g10780D	-2.96133	3.1893e-09
BnaC04g12550D	-2.95665	0.0127428
BnaA02g14540D	-2.9515	0.0147954
BnaA09g04980D	-2.94426	0.0165728
BnaC07g47910D	-2.93429	0.0221498
BnaA05g05230D	-2.93317	4.78497e-08
BnaA06g38550D	-2.92948	7.24587e-06
BnaC02g29300D	-2.92818	0.00369234
BnaC05g51010D	-2.91928	0.00293256
BnaAnng19090D	-2.91902	4.44081e-05
BnaAnng25560D	-2.91093	0.00538562
BnaC05g35900D	-2.91029	0.0448419
BnaA05g24730D	-2.90659	0.0114263
BnaA03g47160D	-2.90651	0.0386214
BnaC04g08090D	-2.90604	6.75918e-05
BnaAnng10160D	-2.90041	0.000899962
BnaC06g15670D	-2.88937	0.0001411
BnaC03g69350D	-2.88917	3.08979e-10
BnaC06g17940D	-2.8876	0.0066824
BnaA05g07450D	-2.88348	4.60776e-05
BnaA07g07740D	-2.87899	0.0143421
BnaC05g50730D	-2.87734	0.00488662
BnaC07g46940D	-2.87688	0.0274186
BnaA09g25760D	-2.87662	0.00815599
BnaA05g27840D	-2.87349	0.000165797
BnaA10g15870D	-2.87041	0.000464608
BnaC08g31150D	-2.87008	0.0463262
BnaC02g10190D	-2.86966	0.0010995
BnaA03g55000D	-2.85965	0.00251476
BnaCnng08280D	-2.85683	0.0285448
BnaCnng23900D	-2.84793	2.67362e-05
BnaC06g26300D	-2.84749	4.33354e-05
BnaA09g13710D	-2.83851	1.61454e-12
BnaA09g47750D	-2.8377	0.00376281
BnaC02g01750D	-2.82762	0.0382823
BnaA04g00250D	-2.82572	0.00345143
BnaA08g16820D	-2.82264	1.93388e-09
BnaC05g17420D	-2.8113	0.000382144
BnaC08g07850D	-2.80975	2.27892e-05
BnaC01g10590D	-2.80629	0.0232243
BnaC09g18770D	-2.80507	9.28987e-05
BnaC07g27420D	-2.80274	8.14554e-05
BnaA06g38100D	-2.79956	3.07528e-05
BnaA09g20220D	-2.79578	0.000166846
BnaC09g50190D	-2.79035	0.00186058
BnaA03g48990D	-2.78591	0.0254231
BnaA05g14930D	-2.78324	0.0167417
BnaA09g34720D	-2.7793	1.62305e-07
BnaC05g10320D	-2.7745	0.0322334
BnaA09g33760D	-2.76946	9.24577e-05
BnaC08g01820D	-2.76492	0.00624769
BnaA06g17400D	-2.75848	0.00217257
BnaA06g15210D	-2.75662	0.00105003
BnaA04g26560D	-2.75349	3.21939e-06
BnaA08g25340D	-2.75108	4.6494e-05
BnaA01g15630D	-2.74663	0.000260288
BnaC07g07540D	-2.7388	0.000605131
BnaA06g39270D	-2.73228	0.0461868
BnaC03g52910D	-2.73179	1.28578e-05
BnaA04g11780D	-2.73134	0.00377701
BnaA01g01400D	-2.73132	0.0430894
BnaA09g49810D	-2.72984	3.92034e-09
BnaC02g05810D	-2.72495	0.00912458
BnaC05g39570D	-2.70895	0.00550836
BnaA02g21380D	-2.70796	0.0211366
BnaC05g12070D	-2.70732	2.96656e-09
BnaA08g07940D	-2.70718	6.35676e-05
BnaC08g18620D	-2.70418	0.00116174
BnaA09g51700D	-2.70349	0.00221934
BnaA07g37160D	-2.70266	0.000732639
BnaC03g03350D	-2.69855	4.01697e-05
BnaA09g32370D	-2.69662	0.00969046
BnaA09g02500D	-2.6818	0.0203098
BnaC05g47430D	-2.67748	0.0182456
BnaA05g29390D	-2.67178	8.01813e-07
BnaA05g24200D	-2.67156	0.000342991
BnaC03g31710D	-2.67086	0.0252993
BnaC09g40310D	-2.67085	0.0122154
BnaA09g06020D	-2.66902	0.0261909
BnaC05g41590D	-2.66897	0.000341363
BnaAnng22920D	-2.66697	2.3544e-07
BnaCnng26020D	-2.66418	0.0372031
BnaA02g30900D	-2.66107	0.000253241
BnaA06g22230D	-2.65875	0.0176269
BnaCnng15230D	-2.65355	0.00505046
BnaA09g52790D	-2.65353	0.0421587
BnaA10g30200D	-2.65044	0.00150473
BnaC04g29840D	-2.64164	0.00176889
BnaC03g76640D	-2.64146	0.00453194
BnaCnng74600D	-2.6408	0.000502153
BnaC07g38650D	-2.63632	0.00875449
BnaC08g22870D	-2.63384	0.00679799
BnaA08g15250D	-2.63336	0.000998625
BnaC03g42620D	-2.63219	0.0204651
BnaA03g24580D	-2.63138	0.0179333
BnaCnng31870D	-2.62797	2.12005e-09
BnaC04g14260D	-2.6264	0.0237876
BnaA02g33900D	-2.62548	0.0359065
BnaC04g15130D	-2.62431	0.00758191
BnaA06g10520D	-2.62307	1.09795e-06
BnaC07g10760D	-2.61963	0.00123575
BnaA06g20200D	-2.61816	0.00276265
BnaA06g17710D	-2.61766	0.0068777
BnaA08g07000D	-2.61719	5.15434e-05
BnaA02g27980D	-2.61069	7.22973e-06
BnaA06g29280D	-2.59644	8.3861e-06
BnaC02g11560D	-2.59554	0.0307228
BnaA03g04440D	-2.59012	0.000289851
BnaC09g45720D	-2.5883	0.0315101
BnaC03g53620D	-2.58587	0.00954121
BnaA07g10320D	-2.58157	0.000967435
BnaA09g36240D	-2.57717	0.000144045
BnaC01g37460D	-2.576	0.0155332
BnaA10g12930D	-2.56775	0.0461868
BnaA05g01890D	-2.56714	0.000996879
BnaA04g17050D	-2.56568	0.0295567
BnaCnng36390D	-2.56166	0.000618829
BnaCnng40790D	-2.56115	1.34253e-05
BnaA09g03550D	-2.56104	0.0332205
BnaA09g05710D	-2.55904	0.000443878
BnaC01g03410D	-2.55077	0.0014967
BnaCnng33070D	-2.55067	5.70777e-05
BnaCnng14480D	-2.5481	0.00280017
BnaC05g41300D	-2.54319	4.62536e-05
BnaCnng13910D	-2.52961	0.0139721
BnaC06g37790D	-2.52937	0.000793919
BnaA10g03460D	-2.52847	0.0307415
BnaC03g05980D	-2.52835	0.00023116
BnaCnng07680D	-2.52834	0.00119795
BnaC03g29750D	-2.52144	0.00473341
BnaA04g10780D	-2.51838	0.0144817
BnaC07g06590D	-2.51795	0.000146292
BnaA03g02320D	-2.51709	0.00168189
BnaA03g02650D	-2.51626	0.00178066
BnaA07g21340D	-2.51608	0.00178001
BnaA05g27170D	-2.51111	0.00480726
BnaA03g44400D	-2.51018	0.0246014
BnaC09g32850D	-2.50873	0.0423047
BnaA02g07700D	-2.50694	0.0486743
BnaC01g18640D	-2.4984	0.00219529
BnaC05g16590D	-2.49727	0.0068777
BnaA02g21180D	-2.49656	0.00102129
BnaC04g14150D	-2.49639	0.0068777
BnaA08g25100D	-2.49607	0.000184656
BnaC08g31370D	-2.48603	0.000474348
BnaC08g25680D	-2.48179	2.3544e-07
BnaC03g61160D	-2.47933	0.0064204
BnaC07g33360D	-2.47861	0.0112871
BnaC03g69970D	-2.47696	0.00458699
BnaA01g12380D	-2.47671	0.000325035
BnaA06g38150D	-2.47644	0.00108399
BnaC07g36400D	-2.47541	0.0142722
BnaC01g05300D	-2.47533	0.00380748
BnaA04g14350D	-2.47426	0.0442144
BnaA05g05780D	-2.47309	0.000833886
BnaA10g08760D	-2.47241	6.85713e-05
BnaA07g24610D	-2.4686	0.00292503
BnaC02g44590D	-2.46838	1.92376e-05
BnaC05g15970D	-2.46588	0.0372495
BnaAnng07090D	-2.46489	0.00665815
BnaC03g38830D	-2.45537	0.00168189
BnaA02g23460D	-2.45291	3.06137e-06
BnaA07g14460D	-2.45056	0.0115376
BnaC03g66780D	-2.45049	0.00488936
BnaA03g39650D	-2.44938	4.8265e-06
BnaA06g01680D	-2.44898	2.3544e-07
BnaC08g14590D	-2.44842	4.53714e-05
BnaA06g16330D	-2.4475	8.1924e-05
BnaCnng24140D	-2.44605	1.03687e-07
BnaA07g06030D	-2.44567	0.00253191
BnaA05g24040D	-2.44408	0.0429183
BnaC03g70970D	-2.44239	0.00551041
BnaA05g21380D	-2.44086	0.00556838
BnaC05g42010D	-2.43963	0.0103869
BnaC09g18650D	-2.43478	0.0225852
BnaA09g07540D	-2.4316	0.00662164
BnaA02g09460D	-2.43034	8.86549e-08
BnaC02g36330D	-2.42743	0.0109028
BnaCnng72210D	-2.42452	0.000199306
BnaC08g02750D	-2.40265	0.00167771
BnaCnng05900D	-2.39602	0.0427428
BnaA07g31870D	-2.39374	0.00565476
BnaCnng42700D	-2.39204	0.0307415
BnaC01g19630D	-2.38417	0.00107863
BnaC04g43390D	-2.38217	0.00120938
BnaA08g16090D	-2.37738	0.000476851
BnaC01g00600D	-2.37646	0.000327734
BnaAnng40350D	-2.37606	0.000199306
BnaC06g07480D	-2.3727	9.11289e-06
BnaC03g37090D	-2.37111	0.0249435
BnaC02g21010D	-2.36602	0.019936
BnaC06g04090D	-2.36398	0.0127125
BnaC08g11290D	-2.35919	0.0298694
BnaC05g38240D	-2.3493	5.24507e-05
BnaA02g02290D	-2.34712	0.00103412
BnaA10g27170D	-2.34565	0.000205096
BnaC09g22580D	-2.33988	0.00752217
BnaA05g09180D	-2.33853	0.00608079
BnaA03g53180D	-2.33803	0.000363154
BnaA06g40360D	-2.33674	0.0488712
BnaA05g16480D	-2.33408	2.28297e-05
BnaA04g08640D	-2.33211	1.71477e-05
BnaA06g14510D	-2.32936	0.0175829
BnaC04g11530D	-2.32913	0.0376972
BnaA07g38680D	-2.3279	0.000334172
BnaA07g23290D	-2.32743	0.00291058
BnaA05g23450D	-2.32562	0.0104469
BnaA10g11600D	-2.32542	0.001083
BnaA06g00210D	-2.32295	1.0819e-07
BnaC06g34760D	-2.32272	0.00046822
BnaA05g14440D	-2.32224	0.0119475
BnaA02g07740D	-2.32011	0.000859002
BnaC05g19790D	-2.31476	0.00235468
BnaA04g07660D	-2.31037	0.00505615
BnaA06g37360D	-2.30721	0.00113051
BnaC02g33160D	-2.30468	0.0126449
BnaA07g13770D	-2.29982	0.01359
BnaA10g29130D	-2.2986	0.00866875
BnaC09g51750D	-2.27983	0.0167638
BnaC04g33980D	-2.27903	0.00596005
BnaC03g13380D	-2.27828	0.0478489
BnaC01g05230D	-2.27112	6.34314e-06
BnaA03g03200D	-2.26806	0.0258147
BnaA07g33280D	-2.26443	0.023375
BnaC04g08270D	-2.26132	0.000171723
BnaA04g20980D	-2.26075	0.00107863
BnaC08g27800D	-2.25748	4.35643e-05
BnaA07g02880D	-2.25388	1.43181e-05
BnaA02g19770D	-2.25013	0.0461868
BnaA03g33660D	-2.24356	0.0127843
BnaA02g16680D	-2.24175	0.0334708
BnaC02g24140D	-2.24022	0.00138206
BnaC07g48440D	-2.23976	0.013648
BnaA05g21210D	-2.23876	0.0126449
BnaA01g03860D	-2.23775	5.44486e-06
BnaC02g00740D	-2.23539	0.0173355
BnaA08g28900D	-2.2342	0.00603151
BnaA04g08160D	-2.23399	0.00421377
BnaA06g12810D	-2.22811	0.00455619
BnaCnng03230D	-2.22611	0.000715568
BnaC05g34130D	-2.22459	0.0194171
BnaA01g25400D	-2.22116	3.62424e-06
BnaA09g56570D	-2.21593	2.88519e-07
BnaC01g41000D	-2.21519	9.71847e-05
BnaC04g06110D	-2.21222	0.0144817
BnaA09g22870D	-2.21052	0.00558228
BnaA09g48920D	-2.21041	7.59576e-07
BnaA09g55900D	-2.20929	0.0118105
BnaC06g41070D	-2.20871	3.71554e-05
BnaC04g49940D	-2.20512	0.00137432
BnaC03g60830D	-2.20422	0.00111962
BnaA03g06130D	-2.20408	0.00226643
BnaA09g17630D	-2.20222	0.0052043
BnaC02g03130D	-2.20121	0.0281766
BnaC04g30250D	-2.20064	0.000225761
BnaA05g34410D	-2.1996	0.0169141
BnaA09g28290D	-2.19897	0.0348274
BnaC07g41200D	-2.19763	0.0107774
BnaA07g32300D	-2.19737	0.000112518
BnaA10g08330D	-2.19702	0.000603309
BnaC08g07070D	-2.19406	0.0158841
BnaC06g04530D	-2.19103	0.00126785
BnaC03g77320D	-2.18597	0.000258965
BnaC08g31360D	-2.18352	0.000174596
BnaC03g59670D	-2.1835	1.80722e-05
BnaA09g04740D	-2.18311	0.0101143
BnaCnng29880D	-2.18218	0.00572605
BnaAnng09390D	-2.18017	0.0113647
BnaC04g46560D	-2.17898	2.5035e-05
BnaC04g30810D	-2.17317	0.000113148
BnaC04g39630D	-2.17275	0.00751578
BnaA07g07570D	-2.1723	0.0039196
BnaA07g38700D	-2.16997	0.000184656
BnaA08g17800D	-2.16943	0.0120351
BnaC07g29960D	-2.16883	0.00556838
BnaAnng41210D	-2.16811	0.0018376
BnaCnng56890D	-2.16792	0.0271995
BnaC06g13410D	-2.1632	0.00845007
BnaA03g60230D	-2.15822	0.0256969
BnaA06g23870D	-2.15747	0.0175829
BnaCnng44960D	-2.15153	0.000599062
BnaA01g16440D	-2.14845	0.0190051
BnaC03g56370D	-2.14685	0.0235859
BnaAnng07320D	-2.14292	0.00108399
BnaA08g23760D	-2.14167	0.0194215
BnaC08g15110D	-2.14118	0.00137986
BnaC06g26170D	-2.13787	0.0134676
BnaA10g21530D	-2.1371	0.004067
BnaA02g34700D	-2.13393	0.0265355
BnaCnng20870D	-2.13017	0.00276265
BnaCnng57190D	-2.12582	0.00480726
BnaA08g25330D	-2.12418	0.0251515
BnaA09g47510D	-2.12008	0.00393976
BnaA05g23690D	-2.11312	0.0251474
BnaA08g17660D	-2.11206	1.9529e-07
BnaC03g74470D	-2.11202	0.012492
BnaC09g38450D	-2.11127	0.00121915
BnaCnng46650D	-2.10628	0.00602476
BnaA10g02050D	-2.10621	0.00633759
BnaC09g36680D	-2.10508	0.0135403
BnaA07g31090D	-2.10263	0.00113422
BnaC02g29350D	-2.10112	0.0307415
BnaC09g33650D	-2.09792	0.0210241
BnaC03g30510D	-2.09617	0.0016957
BnaA04g26290D	-2.09596	0.0478404
BnaC02g43350D	-2.09563	0.00046822
BnaCnng32150D	-2.095	0.0030818
BnaA06g39280D	-2.08764	0.000416232
BnaA07g24620D	-2.08544	0.000223883
BnaA06g27360D	-2.08489	0.00011114
BnaC03g70920D	-2.08474	0.0191609
BnaC03g33880D	-2.0813	0.0151039
BnaA10g26930D	-2.07715	0.000455509
BnaA03g32960D	-2.07483	0.0151372
BnaA06g19860D	-2.07006	0.0134239
BnaA02g34420D	-2.06981	0.000930428
BnaC05g24210D	-2.06844	0.000603468
BnaA08g05990D	-2.06622	0.0445684
BnaA05g16460D	-2.06431	0.00611187
BnaA05g09020D	-2.0625	0.0316389
BnaC08g43200D	-2.05132	0.000135887
BnaCnng09300D	-2.05021	0.0486763
BnaA09g39610D	-2.04998	0.0287481
BnaCnng17470D	-2.0491	0.00236556
BnaA05g23020D	-2.04494	0.00928622
BnaA03g32640D	-2.04225	0.00956079
BnaA06g17600D	-2.04193	0.0357901
BnaA07g03200D	-2.04051	0.00155932
BnaA02g13320D	-2.03487	0.000134739
BnaA02g11080D	-2.03247	0.0161826
BnaC09g19620D	-2.03167	0.00312037
BnaA06g01790D	-2.0298	0.00119586
BnaA07g32130D	-2.0297	0.00927726
BnaA10g26220D	-2.02631	0.0431577
BnaA08g14820D	-2.02359	0.0357667
BnaCnng33450D	-2.02226	0.0253006
BnaC03g71780D	-2.02072	4.22053e-06
BnaC05g12780D	-2.02057	0.00214221
BnaAnng08930D	-2.01819	0.00393758
BnaA07g14320D	-2.01534	0.00366447
BnaA01g24250D	-2.00686	0.0430943
BnaA03g15250D	-2.00552	0.00281057
BnaC03g49360D	-2.00194	0.0251291
BnaC05g13400D	-2.00023	0.00400315
BnaA09g45840D	-1.99988	0.0421521
BnaC09g43360D	-1.99847	5.06314e-05
BnaC08g07980D	-1.99498	0.000133671
BnaA08g04190D	-1.99394	0.0299742
BnaA09g48480D	-1.99254	0.0408443
BnaC05g01980D	-1.99205	0.0135784
BnaA08g22200D	-1.99064	0.024633
BnaA09g12210D	-1.98966	0.0372434
BnaA02g13920D	-1.98795	0.0334708
BnaA02g33370D	-1.98319	0.0158547
BnaC03g59290D	-1.979	0.0460405
BnaC03g59520D	-1.97578	1.70822e-05
BnaA04g23780D	-1.96988	0.000183887
BnaC06g41080D	-1.96909	0.000270534
BnaCnng43860D	-1.96791	0.0387443
BnaCnng35830D	-1.96636	0.0134239
BnaA07g30200D	-1.96379	0.045311
BnaA05g31990D	-1.96358	0.011278
BnaC07g36250D	-1.96313	0.0143421
BnaC03g59080D	-1.96257	0.0394901
BnaA10g12250D	-1.9616	0.0438242
BnaC03g22680D	-1.96155	0.0491828
BnaA04g24330D	-1.95217	0.0486763
BnaC08g05120D	-1.94624	0.0120947
BnaC05g19570D	-1.94601	0.0228072
BnaA03g42870D	-1.94592	0.00483916
BnaA07g19610D	-1.93972	0.00713433
BnaA10g02550D	-1.9318	0.046235
BnaC08g38660D	-1.93083	1.09898e-05
BnaC07g34180D	-1.9305	0.0107834
BnaA06g05390D	-1.93033	0.00152778
BnaA09g24540D	-1.92962	0.0334305
BnaC08g28700D	-1.92613	0.0237965
BnaA01g29230D	-1.92352	0.0325557
BnaCnng04230D	-1.92277	7.69641e-05
BnaC05g43640D	-1.92242	0.0353129
BnaA05g19250D	-1.92236	0.000102039
BnaC05g24200D	-1.92167	0.000603309
BnaA02g25020D	-1.9212	0.00199221
BnaCnng76920D	-1.92007	0.00180569
BnaAnng10570D	-1.91946	0.0127428
BnaC05g01520D	-1.91475	0.0165728
BnaA02g02350D	-1.91251	0.00654208
BnaC01g23360D	-1.90995	0.0285501
BnaA01g01020D	-1.90726	0.00683654
BnaC01g11300D	-1.90562	0.0158601
BnaA09g42380D	-1.90325	0.0221498
BnaA05g06450D	-1.90299	0.0034407
BnaC08g35130D	-1.90297	0.0374392
BnaC06g37830D	-1.9009	0.0357439
BnaA03g25300D	-1.89733	0.00401648
BnaC08g09650D	-1.89691	0.0183786
BnaA06g17350D	-1.89287	1.54455e-08
BnaA08g06520D	-1.89026	0.0221498
BnaA09g22540D	-1.88058	5.93143e-06
BnaA09g03700D	-1.87685	0.00773869
BnaA04g20160D	-1.87637	0.00660072
BnaA08g04820D	-1.87629	8.33224e-07
BnaC08g48810D	-1.87439	0.000510334
BnaA06g26320D	-1.87335	0.0159597
BnaCnng15190D	-1.87267	1.64096e-08
BnaA04g22820D	-1.87267	0.0478915
BnaAnng13830D	-1.87235	0.00239207
BnaC02g20120D	-1.87177	0.00278727
BnaA03g23840D	-1.87149	0.0064204
BnaC05g29040D	-1.86853	0.00720663
BnaA03g25930D	-1.86658	0.0252516
BnaC06g31970D	-1.86636	0.00209616
BnaA06g01690D	-1.8645	5.93143e-06
BnaA04g08570D	-1.85847	0.000273982
BnaA03g59020D	-1.85836	0.00759389
BnaA09g29920D	-1.85389	0.0206967
BnaC05g08430D	-1.84834	0.00510938
BnaC07g41520D	-1.84425	0.017852
BnaC09g25860D	-1.83709	0.000199306
BnaA02g33190D	-1.83708	0.0133355
BnaC06g00560D	-1.83565	0.0341575
BnaA06g07790D	-1.83461	0.00280017
BnaC08g40850D	-1.83394	0.00197453
BnaA01g36640D	-1.83155	0.0307415
BnaC08g47170D	-1.82963	0.0491228
BnaCnng07770D	-1.82962	0.00197918
BnaA03g02250D	-1.82948	0.04745
BnaAnng12670D	-1.8284	2.71541e-06
BnaC04g46620D	-1.82768	0.0206072
BnaC07g14470D	-1.82663	0.00258068
BnaC03g70490D	-1.82592	0.029255
BnaC02g39310D	-1.82575	0.00294809
BnaA08g06760D	-1.82077	0.0146711
BnaA01g22670D	-1.81638	8.67705e-06
BnaC07g22750D	-1.81559	0.0128319
BnaA05g33390D	-1.81395	0.00845007
BnaA06g36180D	-1.81331	0.000612364
BnaC08g49190D	-1.81312	0.0408443
BnaA03g47110D	-1.81046	0.0366316
BnaA02g12430D	-1.80782	0.0034407
BnaA02g05560D	-1.8068	0.0107848
BnaA03g11710D	-1.80451	3.00666e-05
BnaC02g39660D	-1.80344	0.0127428
BnaC08g20440D	-1.80321	0.000363371
BnaA04g23090D	-1.80042	0.0168595
BnaC05g24600D	-1.8003	0.0198648
BnaC07g29680D	-1.79618	0.0006196
BnaA05g32660D	-1.79613	0.0242979
BnaA09g54020D	-1.79291	0.00219529
BnaA10g15900D	-1.79196	0.00042031
BnaA01g15320D	-1.79105	0.012492
BnaC03g28340D	-1.78443	0.0100356
BnaC04g51610D	-1.78095	2.85296e-05
BnaA09g19970D	-1.7808	0.00354189
BnaCnng65550D	-1.77438	0.00528823
BnaA06g15400D	-1.77426	0.0021543
BnaC01g20350D	-1.77238	0.00119586
BnaA07g24720D	-1.77149	0.0373787
BnaA04g26780D	-1.77018	0.000340937
BnaA04g25470D	-1.76783	0.00796534
BnaC09g36910D	-1.7672	0.0161938
BnaA08g29910D	-1.76642	0.000951086
BnaC07g16350D	-1.76331	0.00141761
BnaAnng11630D	-1.76235	0.00233875
BnaC02g47130D	-1.76035	0.000341222
BnaA07g24840D	-1.75512	0.0089574
BnaA08g04610D	-1.75503	0.00304177
BnaA06g32410D	-1.75349	0.00380748
BnaC07g45360D	-1.74959	0.00967295
BnaAnng05530D	-1.74815	0.0357055
BnaC01g11750D	-1.74773	0.0289572
BnaA07g14470D	-1.74761	0.0413757
BnaC08g24510D	-1.74518	0.0165004
BnaC07g39280D	-1.74376	0.0217759
BnaA07g18520D	-1.74211	0.0070764
BnaA01g24810D	-1.74037	0.0296449
BnaC05g05070D	-1.73709	0.00720663
BnaA05g26040D	-1.73437	0.0408225
BnaC08g44890D	-1.73211	2.59308e-05
BnaA05g12390D	-1.72709	0.0035894
BnaC08g04860D	-1.7253	0.0210824
BnaC03g60280D	-1.72419	0.00101656
BnaA02g24310D	-1.72193	0.000632442
BnaA10g26060D	-1.71818	0.00480726
BnaA04g00110D	-1.71638	0.00869846
BnaCnng17860D	-1.71632	0.0358848
BnaA07g31810D	-1.71466	0.0173883
BnaC05g32770D	-1.71426	0.0316536
BnaAnng27170D	-1.71213	0.0400099
BnaA08g31180D	-1.71212	0.00480587
BnaC09g32640D	-1.71212	0.00988899
BnaC08g12860D	-1.71205	0.0423814
BnaC04g15030D	-1.71197	0.00219529
BnaAnng16570D	-1.70886	0.0180857
BnaA06g11890D	-1.70389	0.0423476
BnaA10g29840D	-1.70354	0.0115456
BnaC03g70960D	-1.70171	0.0276467
BnaC05g08610D	-1.69825	0.00640922
BnaA07g16530D	-1.69545	0.00346329
BnaA08g02020D	-1.69409	0.00393976
BnaA04g17040D	-1.69131	0.0292347
BnaA08g20540D	-1.69113	0.001083
BnaC09g25510D	-1.68375	0.016335
BnaC02g16080D	-1.68235	0.011937
BnaA10g22060D	-1.68107	0.0283781
BnaA09g46780D	-1.67766	0.0152243
BnaA05g31410D	-1.6776	0.0322487
BnaA09g26140D	-1.67528	0.0035047
BnaA10g03540D	-1.67335	0.0262152
BnaC04g06020D	-1.67253	0.0426184
BnaC01g29520D	-1.67146	3.54488e-05
BnaC03g09830D	-1.66715	0.00135589
BnaC06g28840D	-1.6668	0.0202338
BnaC07g20800D	-1.66546	0.0184601
BnaA08g29920D	-1.66422	0.00871044
BnaA01g30320D	-1.66381	0.0122059
BnaC08g41790D	-1.66349	0.0357667
BnaC02g35030D	-1.66217	0.00393149
BnaA05g35560D	-1.66066	0.013475
BnaA01g28980D	-1.65916	0.0421587
BnaC04g51600D	-1.65113	0.0108821
BnaC08g35470D	-1.64671	0.0119142
BnaC06g10950D	-1.64544	0.0188433
BnaC03g50210D	-1.6451	0.00881354
BnaA01g20040D	-1.64358	0.00458699
BnaA09g07840D	-1.64174	0.0023709
BnaA06g11550D	-1.63494	0.0120947
BnaA09g19870D	-1.63024	8.88132e-05
BnaAnng17200D	-1.62604	0.00293504
BnaC08g07970D	-1.62558	0.00186915
BnaA07g12480D	-1.62092	6.94245e-06
BnaC09g34110D	-1.62055	0.0438266
BnaC03g73640D	-1.62029	0.00659415
BnaC06g25760D	-1.6182	0.0416165
BnaA08g27540D	-1.61718	0.0253602
BnaC02g24980D	-1.61677	0.000810135
BnaCnng37430D	-1.61207	0.0315934
BnaA08g11930D	-1.61152	0.0435737
BnaA04g07760D	-1.60731	0.00391932
BnaC08g06050D	-1.60462	0.0182725
BnaAnng17190D	-1.60236	0.00394876
BnaC06g11810D	-1.59682	0.0114263
BnaA07g17040D	-1.59573	0.000206392
BnaC03g41850D	-1.59548	0.00770859
BnaCnng10340D	-1.59439	0.0103198
BnaA07g20510D	-1.58951	0.0037282
BnaCnng47320D	-1.5893	0.0435737
BnaC08g05110D	-1.58848	0.0152679
BnaA06g23190D	-1.58758	0.00548927
BnaCnng23850D	-1.58494	0.025714
BnaA07g16660D	-1.58359	0.0351801
BnaA06g06960D	-1.5831	0.00525212
BnaAnng00500D	-1.58107	0.00304177
BnaA08g09350D	-1.58095	0.0435913
BnaC07g30650D	-1.57879	0.0343612
BnaC06g29080D	-1.57762	0.00924906
BnaC05g23270D	-1.57665	0.00808884
BnaC06g25730D	-1.57498	0.00373765
BnaA08g12680D	-1.57252	0.0213647
BnaCnng65670D	-1.57072	0.016359
BnaA06g20770D	-1.56972	0.00143058
BnaC07g23130D	-1.56573	0.0105631
BnaA09g19240D	-1.5651	0.00371621
BnaC09g46980D	-1.56339	0.0283395
BnaA01g00170D	-1.55869	0.00221934
BnaC03g73620D	-1.55673	0.0133915
BnaC09g45670D	-1.5561	0.0294007
BnaA05g12690D	-1.55496	0.0232184
BnaC04g26530D	-1.55425	0.0138784
BnaC09g53840D	-1.55349	0.0316843
BnaC08g46180D	-1.54351	0.0205429
BnaC08g23140D	-1.53885	0.0221498
BnaA08g07200D	-1.52906	0.0475563
BnaCnng23930D	-1.52847	0.0302782
BnaA05g06820D	-1.52666	0.0292252
BnaC09g20060D	-1.5211	0.0371362
BnaA09g12300D	-1.5201	0.0231603
BnaC03g56240D	-1.5177	0.0112711
BnaC01g38270D	-1.51733	0.0326296
BnaA09g19640D	-1.51416	0.04149
BnaA02g27620D	-1.51309	0.0183743
BnaA03g36010D	-1.51158	0.022105
BnaA08g02310D	-1.51123	0.0383649
BnaC04g40340D	-1.50863	0.0375875
BnaC09g36720D	-1.50763	0.034129
BnaC01g24850D	-1.50722	0.00912458
BnaA09g12770D	-1.50702	0.0349971
BnaA08g08360D	-1.50519	0.0208218
BnaA10g04730D	-1.49843	0.0136738
BnaC08g01880D	-1.49739	0.000321676
BnaC05g18600D	-1.49683	0.00564203
BnaAnng13370D	-1.49479	0.00780533
BnaC03g48760D	-1.49455	0.0305322
BnaC06g15470D	-1.48997	0.00128249
BnaC05g03230D	-1.48977	0.0224772
BnaC08g35820D	-1.48736	0.0340319
BnaC03g07870D	-1.48713	0.0266487
BnaA07g26680D	-1.48565	0.00078116
BnaC06g17550D	-1.48261	0.0184601
BnaA06g37230D	-1.48102	0.00564203
BnaC08g27590D	-1.48079	0.0017636
BnaC08g49490D	-1.47549	0.0421521
BnaC03g12480D	-1.47398	0.0211955
BnaC03g38540D	-1.47364	0.000327599
BnaC04g21740D	-1.47274	0.000951086
BnaC09g22280D	-1.47094	0.00731366
BnaC01g09730D	-1.46905	0.000918233
BnaCnng11890D	-1.4656	0.00768684
BnaA06g33450D	-1.46166	0.0121785
BnaC03g70700D	-1.45855	0.023233
BnaAnng14750D	-1.45176	0.00270831
BnaC08g47180D	-1.44943	0.0356741
BnaC03g32530D	-1.44916	0.0122178
BnaC03g68430D	-1.4466	0.026272
BnaC04g30870D	-1.44392	0.00810701
BnaA07g07420D	-1.44065	0.0405834
BnaA03g27520D	-1.44039	0.0221498
BnaA01g33560D	-1.43975	0.0266487
BnaC04g00600D	-1.43683	0.0125255
BnaC07g24760D	-1.43401	0.0271583
BnaC06g26560D	-1.43281	0.0192855
BnaA05g07240D	-1.43213	0.0333912
BnaA10g22420D	-1.43191	0.0304963
BnaA08g21860D	-1.43037	0.0289113
BnaC03g23340D	-1.43019	0.0064204
BnaCnng49000D	-1.42745	0.00306588
BnaC05g04590D	-1.4267	0.000261179
BnaA05g12410D	-1.42314	0.0293178
BnaC02g22900D	-1.42305	0.000513091
BnaC09g21870D	-1.42063	0.000389754
BnaC02g25950D	-1.41216	0.0491228
BnaC02g48890D	-1.4121	0.0056863
BnaCnng32750D	-1.41178	0.0240429
BnaC01g01090D	-1.4078	0.0056402
BnaC02g25080D	-1.40777	0.0423814
BnaA06g04090D	-1.4067	0.0152015
BnaA09g05590D	-1.40599	0.00467855
BnaA07g28910D	-1.40104	0.0171244
BnaA05g01060D	-1.39924	0.0474223
BnaC03g40200D	-1.39491	0.0371293
BnaA06g04820D	-1.39239	0.0238813
BnaC05g12200D	-1.39137	0.036415
BnaC06g01550D	-1.39066	0.00665815
BnaCnng20460D	-1.38658	0.00221002
BnaC06g41750D	-1.38633	0.0392682
BnaAnng00210D	-1.38463	0.030061
BnaA02g34760D	-1.38269	0.00481945
BnaC06g20160D	-1.37865	0.0108394
BnaC05g09210D	-1.37224	0.0374034
BnaC07g22840D	-1.37097	0.00344365
BnaC08g06270D	-1.36975	0.0489359
BnaC08g26740D	-1.36264	0.0360599
BnaC09g24000D	-1.35762	0.0161826
BnaCnng45430D	-1.35303	0.0204066
BnaC08g15160D	-1.35194	0.0283395
BnaA01g29410D	-1.3508	0.0233573
BnaC07g18860D	-1.35005	0.0209409
BnaC08g21600D	-1.34995	0.0357055
BnaC02g24950D	-1.34582	0.0168963
BnaC05g17000D	-1.34313	0.0387643
BnaA07g20370D	-1.33702	0.0392682
BnaC08g19150D	-1.3286	0.0402829
BnaA06g16580D	-1.32726	0.0421849
BnaC02g42890D	-1.32208	0.0228072
BnaA04g19500D	-1.3207	0.0470863
BnaA03g33370D	-1.31984	0.020073
BnaA04g25390D	-1.31978	0.0217759
BnaA04g06570D	-1.31406	0.0263889
BnaC01g36930D	-1.31199	0.0126556
BnaC08g42050D	-1.31094	0.00366447
BnaA03g38340D	-1.31048	0.0336523
BnaC09g51460D	-1.31046	0.0324203
BnaC04g04640D	-1.30835	0.00844967
BnaA09g35380D	-1.305	0.0339548
BnaC03g61150D	-1.29366	0.0345793
BnaA05g12790D	-1.29316	0.0336523
BnaC04g30020D	-1.28167	0.0210505
BnaAnng07140D	-1.2749	0.0305917
BnaC08g42140D	-1.27221	0.0206223
BnaA05g05370D	-1.26571	0.0203098
BnaA07g38250D	-1.26061	0.00581112
BnaC01g26290D	-1.25872	0.0162726
BnaC07g14870D	-1.24272	0.0221927
BnaA08g00380D	-1.24006	0.00686578
BnaC01g23240D	-1.2361	0.0427939
BnaC08g13230D	-1.22987	0.00290187
BnaA10g08550D	-1.22927	0.0383649
BnaC02g25420D	-1.22837	0.0489359
BnaC09g08480D	-1.22596	0.00946508
BnaA08g21500D	-1.22259	0.0114872
BnaC05g06070D	-1.22043	0.0128319
BnaA09g25260D	-1.21688	0.00926875
BnaA01g05720D	-1.21511	0.0405834
BnaC05g39220D	-1.20363	0.045222
BnaCnng21010D	-1.19986	0.00639608
BnaC08g19650D	-1.1741	0.00654208
BnaA03g25060D	-1.16256	0.0350654
BnaA04g00660D	-1.1577	0.005195
BnaA08g28710D	-1.14291	0.0241107
BnaA04g20180D	-1.14153	0.0382717
BnaC05g47950D	-1.1387	0.0439097
BnaC06g11040D	-1.13473	0.0266057
BnaA01g08150D	-1.13017	0.02307
BnaC09g39400D	-1.11051	0.020105
BnaA01g12540D	-1.10263	0.0462868
BnaA08g30780D	-1.07903	0.0219562
BnaC07g16640D	-1.07874	0.00626338
BnaA04g17660D	-1.06017	0.0390376
BnaC04g41290D	-1.03961	0.0121848

## Sheet: S4
annotid	AnnotDesc	Interesting_genes_with_this_annotid	Interesting_genes_with_any_annotation	BG_with_annotid	BG_with_any_annotation	pvalue	p_adj_BH	OR	Interesting_gene_ids
GO0006950	response to stress	222	490	9752	47438	5.47036e-35	1.41792e-31	3.25241	BnaA06g38950D;BnaCnng37520D;BnaA05g12950D;BnaAnng17910D;BnaA09g13300D;BnaA03g00260D;BnaA09g09830D;BnaC03g00160D;BnaA08g06260D;BnaA03g13650D;BnaC07g11810D;BnaC02g45160D;BnaA07g08700D;BnaC02g09390D;BnaAnng04520D;BnaCnng37450D;BnaA03g17400D;BnaC09g37560D;BnaC05g41830D;BnaC03g52730D;BnaC03g59270D;BnaC07g15270D;BnaC05g38410D;BnaC03g21860D;BnaC04g53560D;BnaC04g07760D;BnaC07g36050D;BnaA01g06490D;BnaC04g…
GO0009415	response to water	72	490	1349	47438	3.01909e-30	3.91274e-27	6.16036	BnaCnng37520D;BnaA09g09830D;BnaA08g06260D;BnaC02g45160D;BnaAnng04520D;BnaCnng37450D;BnaA03g17400D;BnaC05g41830D;BnaC04g53560D;BnaC04g53550D;BnaAnng23920D;BnaC09g34350D;BnaA10g11080D;BnaA08g16310D;BnaC08g31770D;BnaA05g05760D;BnaC04g50970D;BnaA03g26220D;BnaA08g00900D;BnaA05g27660D;BnaC03g73200D;BnaC06g05930D;BnaA07g30430D;BnaC03g72040D;BnaA05g01190D;BnaA01g06180D;BnaC03g67810D;BnaC03g48070D;BnaA08g…
GO0009414	response to water deprivation	71	490	1325	47438	6.23044e-30	5.3831e-27	6.17456	BnaCnng37520D;BnaA09g09830D;BnaA08g06260D;BnaC02g45160D;BnaAnng04520D;BnaCnng37450D;BnaA03g17400D;BnaC05g41830D;BnaC04g53560D;BnaC04g53550D;BnaAnng23920D;BnaC09g34350D;BnaA10g11080D;BnaA08g16310D;BnaC08g31770D;BnaA05g05760D;BnaC04g50970D;BnaA03g26220D;BnaA08g00900D;BnaA05g27660D;BnaC03g73200D;BnaC06g05930D;BnaA07g30430D;BnaC03g72040D;BnaA05g01190D;BnaA01g06180D;BnaC03g67810D;BnaC03g48070D;BnaA08g…
GO0001101	response to acid chemical	124	490	4379	47438	1.26314e-25	8.18515e-23	3.39936	BnaCnng37520D;BnaA05g12950D;BnaA09g13300D;BnaA07g24330D;BnaA09g09830D;BnaA08g06260D;BnaA03g13650D;BnaC02g45160D;BnaAnng04520D;BnaCnng37450D;BnaA03g17400D;BnaC05g41830D;BnaC06g13300D;BnaC07g15270D;BnaC05g38410D;BnaC04g53560D;BnaC04g07760D;BnaC07g36050D;BnaC04g53550D;BnaAnng23990D;BnaAnng23920D;BnaC09g34350D;BnaA10g11080D;BnaCnng27950D;BnaA08g16310D;BnaA06g31640D;BnaC08g31770D;BnaA05g05760D;BnaC04g…
GO0009737	response to abscisic acid	76	490	1869	47438	1.81169e-24	9.3918e-22	4.62316	BnaCnng37520D;BnaA05g12950D;BnaA07g24330D;BnaA09g09830D;BnaA08g06260D;BnaA03g13650D;BnaC02g45160D;BnaAnng04520D;BnaCnng37450D;BnaC05g41830D;BnaC07g15270D;BnaC05g38410D;BnaAnng23920D;BnaC09g34350D;BnaA10g11080D;BnaCnng27950D;BnaA06g31640D;BnaC08g31770D;BnaC04g50970D;BnaA03g26220D;BnaA08g00900D;BnaA05g27660D;BnaC03g73200D;BnaC01g03320D;BnaA07g30430D;BnaC04g40810D;BnaA05g01190D;BnaC01g18020D;BnaC03g…
GO0097305	response to alcohol	77	490	1947	47438	4.7579e-24	2.05541e-21	4.49432	BnaCnng37520D;BnaA05g12950D;BnaA07g24330D;BnaA09g09830D;BnaA08g06260D;BnaA03g13650D;BnaC02g45160D;BnaAnng04520D;BnaCnng37450D;BnaC05g41830D;BnaC07g15270D;BnaC05g38410D;BnaAnng23920D;BnaC09g34350D;BnaA10g11080D;BnaCnng27950D;BnaA06g31640D;BnaC08g31770D;BnaC04g50970D;BnaA03g26220D;BnaA08g00900D;BnaA05g27660D;BnaC03g73200D;BnaC01g03320D;BnaA07g30430D;BnaC04g40810D;BnaA05g01190D;BnaC01g18020D;BnaC03g…
GO1901700	response to oxygen-containing compound	144	490	5900	47438	1.31904e-23	4.88423e-21	2.97837	BnaCnng37520D;BnaA05g12950D;BnaA09g13300D;BnaA03g00260D;BnaA07g24330D;BnaA09g09830D;BnaC03g00160D;BnaA08g06260D;BnaA03g13650D;BnaC02g45160D;BnaAnng04520D;BnaCnng37450D;BnaA03g17400D;BnaC05g41830D;BnaC06g13300D;BnaC03g52080D;BnaC07g15270D;BnaC05g38410D;BnaC04g53560D;BnaC04g07760D;BnaC07g36050D;BnaC04g53550D;BnaAnng23990D;BnaAnng23920D;BnaC09g34350D;BnaA10g11080D;BnaCnng27950D;BnaA08g16310D;BnaA06g…
GO0009409	response to cold	64	490	1428	47438	7.77762e-23	2.51995e-20	5.02075	BnaA03g00260D;BnaC03g00160D;BnaA08g06260D;BnaC02g45160D;BnaAnng04520D;BnaCnng37450D;BnaA03g17400D;BnaC09g37560D;BnaC05g41830D;BnaC04g53560D;BnaC04g53550D;BnaA05g29500D;BnaAnng23920D;BnaA08g16310D;BnaA04g21850D;BnaA03g26220D;BnaA05g27660D;BnaC03g73200D;BnaC09g40960D;BnaA02g35330D;BnaC03g72040D;BnaC01g18020D;BnaC03g48070D;BnaA08g18790D;BnaA02g04990D;BnaC05g15780D;BnaA09g28510D;BnaCnng63310D;BnaC04g…
GO0009628	response to abiotic stimulus	158	490	7161	47438	1.57222e-21	4.52799e-19	2.71455	BnaCnng37520D;BnaA05g12950D;BnaAnng17910D;BnaA09g27040D;BnaA09g13300D;BnaA03g00260D;BnaA09g09830D;BnaC03g00160D;BnaA08g06260D;BnaC02g45160D;BnaAnng04520D;BnaCnng37450D;BnaA03g17400D;BnaC09g37560D;BnaA04g17560D;BnaC04g07710D;BnaC05g41830D;BnaC03g52730D;BnaC07g15270D;BnaC04g53560D;BnaC04g07760D;BnaC04g53550D;BnaA01g04780D;BnaA03g02070D;BnaA05g29500D;BnaAnng23920D;BnaC09g34350D;BnaA10g11080D;BnaAnng…
GO0010035	response to inorganic substance	100	490	3427	47438	2.37858e-21	6.16528e-19	3.36185	BnaCnng37520D;BnaA09g13300D;BnaA03g00260D;BnaA09g09830D;BnaC03g00160D;BnaA08g06260D;BnaC02g45160D;BnaAnng04520D;BnaCnng37450D;BnaA03g17400D;BnaC05g41830D;BnaC06g13300D;BnaC07g15270D;BnaC04g53560D;BnaC04g07760D;BnaC04g53550D;BnaCnng37100D;BnaAnng23920D;BnaC09g34350D;BnaA10g11080D;BnaA08g16310D;BnaC08g31770D;BnaA06g24600D;BnaA05g05760D;BnaC04g50970D;BnaA03g26220D;BnaA08g00900D;BnaC06g38200D;BnaA05g…
GO0016054	organic acid catabolic process	32	490	357	47438	2.07824e-20	4.489e-18	10.0231	BnaC04g52580D;BnaC09g20370D;BnaA05g10480D;BnaCnng33690D;BnaA09g32380D;BnaA05g03050D;BnaC04g28570D;BnaC02g13860D;BnaC07g28040D;BnaC05g06260D;BnaC03g74750D;BnaC03g28300D;BnaA09g18440D;BnaA05g33880D;BnaA06g22040D;BnaA03g23800D;BnaC02g13840D;BnaA02g09890D;BnaA07g08220D;BnaA09g53100D;BnaC08g48460D;BnaA06g16270D;BnaA03g15290D;BnaA06g36140D;BnaC07g18960D;BnaA01g24820D;BnaA05g03080D;BnaC04g11470D;BnaCnng…
GO0046395	carboxylic acid catabolic process	32	490	357	47438	2.07824e-20	4.489e-18	10.0231	BnaC04g52580D;BnaC09g20370D;BnaA05g10480D;BnaCnng33690D;BnaA09g32380D;BnaA05g03050D;BnaC04g28570D;BnaC02g13860D;BnaC07g28040D;BnaC05g06260D;BnaC03g74750D;BnaC03g28300D;BnaA09g18440D;BnaA05g33880D;BnaA06g22040D;BnaA03g23800D;BnaC02g13840D;BnaA02g09890D;BnaA07g08220D;BnaA09g53100D;BnaC08g48460D;BnaA06g16270D;BnaA03g15290D;BnaA06g36140D;BnaC07g18960D;BnaA01g24820D;BnaA05g03080D;BnaC04g11470D;BnaCnng…
GO0006970	response to osmotic stress	80	490	2408	47438	2.55296e-20	5.09022e-18	3.73984	BnaA05g12950D;BnaA09g13300D;BnaA08g06260D;BnaAnng04520D;BnaA03g17400D;BnaC03g52730D;BnaC04g53560D;BnaC04g07760D;BnaC04g53550D;BnaA01g04780D;BnaA05g29500D;BnaA10g11080D;BnaA08g16310D;BnaC08g31770D;BnaA04g21850D;BnaA05g05760D;BnaC04g50970D;BnaA08g00900D;BnaC06g38200D;BnaAnng13010D;BnaC03g72040D;BnaCnng33690D;BnaA05g01190D;BnaA06g00850D;BnaA01g06180D;BnaC03g67810D;BnaC03g48070D;BnaA08g18790D;BnaC09g…
GO0033993	response to lipid	84	490	2655	47438	5.12913e-20	9.49622e-18	3.57116	BnaCnng37520D;BnaA05g12950D;BnaA09g13300D;BnaA07g24330D;BnaA09g09830D;BnaA08g06260D;BnaA03g13650D;BnaC02g45160D;BnaAnng04520D;BnaCnng37450D;BnaC05g41830D;BnaC07g15270D;BnaC05g38410D;BnaC04g07760D;BnaC07g36050D;BnaAnng23920D;BnaC09g34350D;BnaA10g11080D;BnaCnng27950D;BnaA06g31640D;BnaC08g31770D;BnaC04g50970D;BnaA03g26220D;BnaA08g00900D;BnaA05g27660D;BnaC03g73200D;BnaC01g03320D;BnaA07g30430D;BnaC04g…
GO0009266	response to temperature stimulus	73	490	2133	47438	2.8997e-19	5.01069e-17	3.81461	BnaA03g00260D;BnaC03g00160D;BnaA08g06260D;BnaC02g45160D;BnaAnng04520D;BnaCnng37450D;BnaA03g17400D;BnaC09g37560D;BnaC05g41830D;BnaC04g53560D;BnaC04g53550D;BnaA05g29500D;BnaAnng23920D;BnaA10g11080D;BnaAnng20740D;BnaA07g33240D;BnaA08g16310D;BnaA04g21850D;BnaC03g16140D;BnaA03g26220D;BnaA05g27660D;BnaC03g73200D;BnaC09g40960D;BnaA02g35330D;BnaC03g72040D;BnaCnng62150D;BnaC01g18020D;BnaC03g48070D;BnaA08g…
GO0050896	response to stimulus	279	490	17575	47438	3.21673e-19	5.21111e-17	2.26689	BnaA06g38950D;BnaCnng37520D;BnaA05g12950D;BnaAnng17910D;BnaA09g27040D;BnaA09g13300D;BnaA03g00260D;BnaA06g02010D;BnaA07g24330D;BnaA09g09830D;BnaC03g00160D;BnaA08g06260D;BnaA03g13650D;BnaC07g11810D;BnaC02g45160D;BnaA07g08700D;BnaC02g09390D;BnaAnng04520D;BnaCnng37450D;BnaA03g17400D;BnaA09g40670D;BnaC09g37560D;BnaA04g17560D;BnaC04g07710D;BnaC05g41830D;BnaA06g11500D;BnaC03g52730D;BnaC06g13300D;BnaC03g…
GO0004722	protein serinethreonine phosphatase activity	21	490	142	47438	2.65591e-18	4.04948e-16	17.3284	BnaA03g13650D;BnaC05g41830D;BnaAnng23920D;BnaC09g34350D;BnaA10g11080D;BnaA05g27660D;BnaA07g30430D;BnaC04g40810D;BnaC01g18020D;BnaC09g53650D;BnaA03g13640D;BnaA04g17200D;BnaA01g37370D;BnaA01g15250D;BnaC06g33910D;BnaA03g47830D;BnaA05g12330D;BnaC03g16540D;BnaA10g12140D;BnaC07g40100D;BnaC04g14780D
GO0009651	response to salt stress	70	490	2090	47438	5.36713e-18	7.72867e-16	3.70693	BnaA05g12950D;BnaA09g13300D;BnaA08g06260D;BnaAnng04520D;BnaA03g17400D;BnaC03g52730D;BnaC04g53560D;BnaC04g07760D;BnaC04g53550D;BnaA01g04780D;BnaA05g29500D;BnaA08g16310D;BnaA04g21850D;BnaA05g05760D;BnaA08g00900D;BnaC06g38200D;BnaAnng13010D;BnaC03g72040D;BnaCnng33690D;BnaA06g00850D;BnaA01g06180D;BnaC03g67810D;BnaC03g48070D;BnaA08g18790D;BnaCnng63310D;BnaC04g53580D;BnaC01g07450D;BnaC03g74750D;BnaA01g…
GO0042221	response to chemical	187	490	10030	47438	7.71494e-18	1.05248e-15	2.3265	BnaCnng37520D;BnaA05g12950D;BnaA09g13300D;BnaA03g00260D;BnaA06g02010D;BnaA07g24330D;BnaA09g09830D;BnaC03g00160D;BnaA08g06260D;BnaA03g13650D;BnaC02g45160D;BnaAnng04520D;BnaCnng37450D;BnaA03g17400D;BnaA09g40670D;BnaC05g41830D;BnaA06g11500D;BnaC06g13300D;BnaC03g52080D;BnaC07g15270D;BnaC05g38410D;BnaC04g53560D;BnaC04g07760D;BnaC07g36050D;BnaC04g53550D;BnaA03g02070D;BnaAnng23990D;BnaCnng37100D;BnaAnng…
GO0044282	small molecule catabolic process	34	490	505	47438	9.9279e-18	1.28666e-15	7.35752	BnaC04g52580D;BnaC09g20370D;BnaAnng20200D;BnaA05g10480D;BnaCnng33690D;BnaA09g32380D;BnaA05g03050D;BnaC04g28570D;BnaC02g13860D;BnaC07g28040D;BnaC05g06260D;BnaC03g74750D;BnaC03g28300D;BnaA09g18440D;BnaA05g33880D;BnaA06g22040D;BnaA03g23800D;BnaC02g13840D;BnaA02g09890D;BnaA07g08220D;BnaA09g53100D;BnaC04g28590D;BnaC08g48460D;BnaA06g16270D;BnaA03g15290D;BnaA06g36140D;BnaC07g18960D;BnaA01g24820D;BnaA05g…
GO0009725	response to hormone	122	490	5578	47438	5.90967e-16	7.29422e-14	2.52117	BnaCnng37520D;BnaA05g12950D;BnaA09g13300D;BnaA03g00260D;BnaA06g02010D;BnaA07g24330D;BnaA09g09830D;BnaC03g00160D;BnaA08g06260D;BnaA03g13650D;BnaC02g45160D;BnaAnng04520D;BnaCnng37450D;BnaA09g40670D;BnaC05g41830D;BnaC07g15270D;BnaC05g38410D;BnaC04g07760D;BnaC07g36050D;BnaA03g02070D;BnaAnng23990D;BnaAnng23920D;BnaC09g34350D;BnaA10g11080D;BnaCnng27950D;BnaA06g31640D;BnaC08g31770D;BnaA08g28620D;BnaC04g…
GO0032991	protein-containing complex	26	490	8183	47438	2.01209e-15	2.37061e-13	0.266475	BnaA06g38950D;BnaAnng34010D;BnaC02g09390D;BnaC07g15270D;BnaA01g04780D;BnaA02g26610D;BnaC02g48590D;BnaA10g14100D;BnaA02g31990D;BnaC02g40580D;BnaC03g34940D;BnaA10g11760D;BnaA03g11410D;BnaC05g00780D;BnaA08g30600D;BnaA02g05510D;BnaA05g07690D;BnaC02g42410D;BnaC03g08040D;BnaCnng63660D;BnaA01g11390D;BnaA06g21560D;BnaA05g21090D;BnaA06g27640D;BnaC05g33960D;BnaA03g29700D
GO0009719	response to endogenous stimulus	123	490	5753	47438	2.75086e-15	3.1001e-13	2.45963	BnaCnng37520D;BnaA05g12950D;BnaA09g13300D;BnaA03g00260D;BnaA06g02010D;BnaA07g24330D;BnaA09g09830D;BnaC03g00160D;BnaA08g06260D;BnaA03g13650D;BnaC02g45160D;BnaAnng04520D;BnaCnng37450D;BnaA09g40670D;BnaC05g41830D;BnaC07g15270D;BnaC05g38410D;BnaC04g07760D;BnaC07g36050D;BnaA03g02070D;BnaAnng23990D;BnaAnng23920D;BnaC09g34350D;BnaA10g11080D;BnaCnng27950D;BnaA06g31640D;BnaC08g31770D;BnaA08g28620D;BnaC04g…
GO0090304	nucleic acid metabolic process	12	490	5876	47438	3.023e-15	3.26484e-13	0.175886	BnaA06g38950D;BnaC02g09390D;BnaA10g14100D;BnaA02g05510D;BnaA06g33900D;BnaCnng63660D;BnaA05g21090D;BnaC05g33960D;BnaA04g07260D;BnaC06g04380D;BnaC07g27620D;BnaA06g02490D
GO0055114	oxidation-reduction process	83	490	3226	47438	1.49543e-14	1.55046e-12	2.84225	BnaC04g52580D;BnaA10g18700D;BnaA09g27040D;BnaA09g13300D;BnaC09g20370D;BnaAnng34010D;BnaA08g06260D;BnaAnng04520D;BnaA03g17400D;BnaC05g31460D;BnaA04g17560D;BnaC07g15270D;BnaC04g53560D;BnaC04g53550D;BnaA03g02070D;BnaC08g11410D;BnaC07g35800D;BnaC01g14990D;BnaA01g03680D;BnaA05g10480D;BnaA06g13760D;BnaA05g05760D;BnaA01g13700D;BnaA08g00900D;BnaAnng19740D;BnaC01g16080D;BnaC07g43770D;BnaC03g72040D;BnaA09g…
GO0010033	response to organic substance	137	490	7027	47438	4.92414e-14	4.90899e-12	2.2564	BnaCnng37520D;BnaA05g12950D;BnaA09g13300D;BnaA03g00260D;BnaA06g02010D;BnaA07g24330D;BnaA09g09830D;BnaC03g00160D;BnaA08g06260D;BnaA03g13650D;BnaC02g45160D;BnaAnng04520D;BnaCnng37450D;BnaA09g40670D;BnaC05g41830D;BnaC03g52080D;BnaC07g15270D;BnaC05g38410D;BnaC04g07760D;BnaC07g36050D;BnaA03g02070D;BnaAnng23990D;BnaAnng23920D;BnaC09g34350D;BnaA10g11080D;BnaCnng27950D;BnaA06g31640D;BnaC08g31770D;BnaA08g…
GO0009611	response to wounding	40	490	935	47438	5.92106e-14	5.68422e-12	4.57385	BnaA06g38950D;BnaAnng17910D;BnaA03g13650D;BnaC08g11410D;BnaAnng23990D;BnaA05g10480D;BnaA01g13700D;BnaA03g26220D;BnaC03g73200D;BnaC04g40810D;BnaC01g16080D;BnaA09g29060D;BnaA08g18790D;BnaA03g13640D;BnaA04g17200D;BnaA06g13250D;BnaA03g60000D;BnaC03g58080D;BnaC05g14810D;BnaC02g15270D;BnaC09g16820D;BnaA08g17540D;BnaC08g37780D;BnaA05g12330D;BnaC03g16540D;BnaA06g18440D;BnaA08g23150D;BnaA06g33900D;BnaC08g…
GO0043170	macromolecule metabolic process	83	490	15081	47438	1.01176e-13	9.366e-12	0.434431	BnaA06g38950D;BnaA10g18700D;BnaCnng37520D;BnaC08g21320D;BnaA03g13650D;BnaC02g09390D;BnaC05g31460D;BnaCnng55020D;BnaC05g41830D;BnaC07g36050D;BnaA05g29500D;BnaC08g13910D;BnaAnng23920D;BnaC09g34350D;BnaA02g26610D;BnaA10g11080D;BnaA07g33240D;BnaA06g13760D;BnaA08g28620D;BnaC02g48590D;BnaC05g14940D;BnaA05g27660D;BnaC01g03320D;BnaA07g30430D;BnaC04g40810D;BnaCnng07500D;BnaA06g15030D;BnaA10g14100D;BnaA01g…
GO0003723	RNA binding	3	490	3644	47438	1.71063e-13	1.52895e-11	0.0732706	BnaC07g50310D;BnaA09g29060D;BnaC07g34380D
GO0010467	gene expression	6	490	4194	47438	5.57971e-13	4.82087e-11	0.126572	BnaA09g29060D;BnaCnng63660D;BnaA05g21090D;BnaC05g33960D;BnaC06g04380D;BnaA06g02490D
GO0051707	response to other organism	82	490	3382	47438	6.04953e-13	5.05819e-11	2.6583	BnaA06g38950D;BnaAnng17910D;BnaA03g00260D;BnaC03g00160D;BnaA03g13650D;BnaC07g11810D;BnaA07g08700D;BnaC02g09390D;BnaC09g37560D;BnaC03g59270D;BnaC05g38410D;BnaC03g21860D;BnaC04g07760D;BnaC07g36050D;BnaA01g06490D;BnaAnng23990D;BnaC08g31770D;BnaA06g24600D;BnaC04g50970D;BnaA03g26220D;BnaC03g73200D;BnaC01g03320D;BnaC04g40810D;BnaCnng57580D;BnaA05g01190D;BnaCnng07500D;BnaA06g15030D;BnaA10g14100D;BnaA03g…
GO0043207	response to external biotic stimulus	82	490	3391	47438	6.67549e-13	5.40714e-11	2.65052	BnaA06g38950D;BnaAnng17910D;BnaA03g00260D;BnaC03g00160D;BnaA03g13650D;BnaC07g11810D;BnaA07g08700D;BnaC02g09390D;BnaC09g37560D;BnaC03g59270D;BnaC05g38410D;BnaC03g21860D;BnaC04g07760D;BnaC07g36050D;BnaA01g06490D;BnaAnng23990D;BnaC08g31770D;BnaA06g24600D;BnaC04g50970D;BnaA03g26220D;BnaC03g73200D;BnaC01g03320D;BnaC04g40810D;BnaCnng57580D;BnaA05g01190D;BnaCnng07500D;BnaA06g15030D;BnaA10g14100D;BnaA03g…
GO0009607	response to biotic stimulus	82	490	3405	47438	7.88029e-13	6.18961e-11	2.63851	BnaA06g38950D;BnaAnng17910D;BnaA03g00260D;BnaC03g00160D;BnaA03g13650D;BnaC07g11810D;BnaA07g08700D;BnaC02g09390D;BnaC09g37560D;BnaC03g59270D;BnaC05g38410D;BnaC03g21860D;BnaC04g07760D;BnaC07g36050D;BnaA01g06490D;BnaAnng23990D;BnaC08g31770D;BnaA06g24600D;BnaC04g50970D;BnaA03g26220D;BnaC03g73200D;BnaC01g03320D;BnaC04g40810D;BnaCnng57580D;BnaA05g01190D;BnaCnng07500D;BnaA06g15030D;BnaA10g14100D;BnaA03g…
GO0072329	monocarboxylic acid catabolic process	18	490	184	47438	1.05205e-12	7.97239e-11	10.7473	BnaC04g52580D;BnaC09g20370D;BnaA05g10480D;BnaCnng33690D;BnaA09g32380D;BnaA05g03050D;BnaC04g28570D;BnaC07g28040D;BnaA09g18440D;BnaA05g33880D;BnaC02g13840D;BnaA02g09890D;BnaA07g08220D;BnaA03g15290D;BnaA01g24820D;BnaA05g03080D;BnaC04g11470D;BnaC07g34380D
GO0009605	response to external stimulus	103	490	4836	47438	1.07652e-12	7.97239e-11	2.37387	BnaA06g38950D;BnaAnng17910D;BnaA03g00260D;BnaC03g00160D;BnaA03g13650D;BnaC07g11810D;BnaA07g08700D;BnaC02g09390D;BnaCnng37450D;BnaC09g37560D;BnaC03g59270D;BnaC07g15270D;BnaC05g38410D;BnaC03g21860D;BnaC04g07760D;BnaC07g36050D;BnaA01g06490D;BnaAnng23990D;BnaC08g31770D;BnaA06g24600D;BnaC04g50970D;BnaA03g26220D;BnaC03g73200D;BnaC01g03320D;BnaC04g40810D;BnaA02g35330D;BnaCnng33690D;BnaCnng57580D;BnaA05g…
GO0098542	defense response to other organism	65	490	2389	47438	1.37323e-12	9.83874e-11	2.93668	BnaA06g38950D;BnaAnng17910D;BnaA03g13650D;BnaC07g11810D;BnaA07g08700D;BnaC02g09390D;BnaC03g59270D;BnaC05g38410D;BnaC03g21860D;BnaC04g07760D;BnaC07g36050D;BnaA01g06490D;BnaAnng23990D;BnaA06g24600D;BnaC01g03320D;BnaC04g40810D;BnaCnng07500D;BnaA06g15030D;BnaA10g14100D;BnaA03g50170D;BnaA09g29060D;BnaC01g28850D;BnaCnng09200D;BnaA03g13640D;BnaA04g17200D;BnaC03g28300D;BnaA06g13250D;BnaA08g18690D;BnaA09g…
GO0001786	phosphatidylserine binding	7	490	10	47438	1.40445e-12	9.83874e-11	226.787	BnaC02g45160D;BnaC05g15780D;BnaA07g11450D;BnaC09g08130D;BnaC07g15380D;BnaA09g07980D;BnaCnng27850D
GO0009063	cellular amino acid catabolic process	16	490	146	47438	3.3443e-12	2.28117e-10	12.1566	BnaCnng33690D;BnaC02g13860D;BnaC05g06260D;BnaC03g74750D;BnaC03g28300D;BnaA06g22040D;BnaA03g23800D;BnaC02g13840D;BnaA02g09890D;BnaA09g53100D;BnaA06g36140D;BnaC07g18960D;BnaA01g24820D;BnaCnng72260D;BnaA02g09960D;BnaA06g38800D
GO0004721	phosphoprotein phosphatase activity	21	490	292	47438	5.45882e-12	3.62802e-10	7.71223	BnaA03g13650D;BnaC05g41830D;BnaAnng23920D;BnaC09g34350D;BnaA10g11080D;BnaA05g27660D;BnaA07g30430D;BnaC04g40810D;BnaC01g18020D;BnaC09g53650D;BnaA03g13640D;BnaA04g17200D;BnaA01g37370D;BnaA01g15250D;BnaC06g33910D;BnaA03g47830D;BnaA05g12330D;BnaC03g16540D;BnaA10g12140D;BnaC07g40100D;BnaC04g14780D
GO1901606	alpha-amino acid catabolic process	15	490	131	47438	8.39656e-12	5.44097e-10	12.7492	BnaCnng33690D;BnaC02g13860D;BnaC05g06260D;BnaC03g74750D;BnaC03g28300D;BnaA06g22040D;BnaA03g23800D;BnaC02g13840D;BnaA02g09890D;BnaA09g53100D;BnaA06g36140D;BnaC07g18960D;BnaA01g24820D;BnaA02g09960D;BnaA06g38800D
GO0006470	protein dephosphorylation	22	490	334	47438	9.61719e-12	6.07994e-10	7.02657	BnaA03g13650D;BnaC05g41830D;BnaAnng23920D;BnaC09g34350D;BnaA10g11080D;BnaA05g27660D;BnaA07g30430D;BnaC04g40810D;BnaC01g18020D;BnaC09g53650D;BnaA03g13640D;BnaA04g17200D;BnaC02g39950D;BnaA01g37370D;BnaA01g15250D;BnaC06g33910D;BnaA03g47830D;BnaA05g12330D;BnaC03g16540D;BnaA10g12140D;BnaC07g40100D;BnaC04g14780D
GO0043228	non-membrane-bounded organelle	16	490	5511	47438	3.59e-11	2.16402e-09	0.254642	BnaA06g38950D;BnaC02g09390D;BnaCnng27210D;BnaC07g15270D;BnaC04g07760D;BnaA05g10480D;BnaA06g24600D;BnaA10g14100D;BnaC03g34940D;BnaC05g00780D;BnaA05g33880D;BnaA02g05510D;BnaA06g21560D;BnaA03g15290D;BnaC04g11470D;BnaA03g29700D
GO0043232	intracellular non-membrane-bounded organelle	16	490	5511	47438	3.59e-11	2.16402e-09	0.254642	BnaA06g38950D;BnaC02g09390D;BnaCnng27210D;BnaC07g15270D;BnaC04g07760D;BnaA05g10480D;BnaA06g24600D;BnaA10g14100D;BnaC03g34940D;BnaC05g00780D;BnaA05g33880D;BnaA02g05510D;BnaA06g21560D;BnaA03g15290D;BnaC04g11470D;BnaA03g29700D
GO0050832	defense response to fungus	34	490	863	47438	4.43013e-11	2.60975e-09	4.14801	BnaAnng17910D;BnaA03g13650D;BnaC07g11810D;BnaA07g08700D;BnaC04g07760D;BnaC07g36050D;BnaA01g06490D;BnaAnng23990D;BnaA06g24600D;BnaC01g03320D;BnaC04g40810D;BnaCnng07500D;BnaA06g15030D;BnaA03g50170D;BnaCnng09200D;BnaA03g13640D;BnaA04g17200D;BnaA08g18690D;BnaA05g33880D;BnaC08g26910D;BnaC01g07710D;BnaA05g12330D;BnaC03g16540D;BnaA07g17230D;BnaA09g47670D;BnaC08g48460D;BnaA06g16270D;BnaA05g28580D;BnaC02g…
GO0006952	defense response	69	490	2894	47438	1.13795e-10	6.55457e-09	2.55984	BnaA06g38950D;BnaAnng17910D;BnaA03g13650D;BnaC07g11810D;BnaA07g08700D;BnaC02g09390D;BnaC03g59270D;BnaC05g38410D;BnaC03g21860D;BnaC04g07760D;BnaC07g36050D;BnaA01g06490D;BnaC08g13910D;BnaAnng23990D;BnaA06g24600D;BnaC01g03320D;BnaC04g40810D;BnaCnng07500D;BnaA06g15030D;BnaA10g14100D;BnaA03g50170D;BnaA09g29060D;BnaA10g18740D;BnaC01g28850D;BnaCnng09200D;BnaA03g13640D;BnaA04g17200D;BnaC03g28300D;BnaA06g…
GO0072341	modified amino acid binding	11	490	72	47438	2.19004e-10	1.23404e-08	17.6514	BnaC02g45160D;BnaA06g11500D;BnaA06g13760D;BnaC05g15780D;BnaA07g11450D;BnaC09g08130D;BnaC05g15180D;BnaC07g15380D;BnaA09g07980D;BnaC08g37940D;BnaCnng27850D
GO0009065	glutamine family amino acid catabolic process	8	490	27	47438	2.28784e-10	1.26172e-08	40.995	BnaCnng33690D;BnaC03g74750D;BnaC03g28300D;BnaA06g22040D;BnaA03g23800D;BnaA06g36140D;BnaC07g18960D;BnaA01g24820D
GO0016491	oxidoreductase activity	66	490	2734	47438	2.51707e-10	1.35922e-08	2.58345	BnaA10g18700D;BnaA09g27040D;BnaA09g13300D;BnaA08g06260D;BnaAnng04520D;BnaA03g17400D;BnaC05g31460D;BnaA04g17560D;BnaC07g15270D;BnaC04g53560D;BnaC04g53550D;BnaA03g02070D;BnaC08g11410D;BnaC07g35800D;BnaC01g14990D;BnaA01g03680D;BnaA06g13760D;BnaA05g05760D;BnaA01g13700D;BnaA08g00900D;BnaAnng19740D;BnaC01g16080D;BnaC07g43770D;BnaC03g72040D;BnaA09g32380D;BnaA06g00850D;BnaAnng31420D;BnaA06g09900D;BnaC01g…
GO0009062	fatty acid catabolic process	14	490	140	47438	2.60441e-10	1.37768e-08	10.9295	BnaC04g52580D;BnaC09g20370D;BnaA05g10480D;BnaA09g32380D;BnaA05g03050D;BnaC04g28570D;BnaC07g28040D;BnaA09g18440D;BnaA05g33880D;BnaA07g08220D;BnaA03g15290D;BnaA05g03080D;BnaC04g11470D;BnaC07g34380D
GO0016070	RNA metabolic process	12	490	4634	47438	2.94258e-10	1.52544e-08	0.229896	BnaA06g38950D;BnaC02g09390D;BnaA10g14100D;BnaA02g05510D;BnaA06g33900D;BnaCnng63660D;BnaA05g21090D;BnaC05g33960D;BnaA04g07260D;BnaC06g04380D;BnaC07g27620D;BnaA06g02490D
GO0006139	nucleobase-containing compound metabolic process	28	490	6978	47438	4.8114e-10	2.44532e-08	0.348794	BnaC03g58870D;BnaA06g38950D;BnaA10g18700D;BnaAnng34010D;BnaC08g28550D;BnaC02g09390D;BnaAnng20200D;BnaCnng37100D;BnaA10g14100D;BnaA02g31990D;BnaC02g40580D;BnaA03g11410D;BnaC05g13120D;BnaC02g44850D;BnaA02g05510D;BnaA06g33900D;BnaC01g34640D;BnaCnng63660D;BnaCnng47950D;BnaA05g21090D;BnaC05g33960D;BnaC09g42430D;BnaA01g27800D;BnaA04g07260D;BnaC06g04380D;BnaC07g27620D;BnaA06g02490D;BnaA06g38800D
GO0006635	fatty acid beta-oxidation	13	490	122	47438	5.1425e-10	2.56334e-08	11.7113	BnaC04g52580D;BnaC09g20370D;BnaA05g10480D;BnaA09g32380D;BnaA05g03050D;BnaC04g28570D;BnaC07g28040D;BnaA09g18440D;BnaA07g08220D;BnaA03g15290D;BnaA05g03080D;BnaC04g11470D;BnaC07g34380D
GO0019395	fatty acid oxidation	14	490	148	47438	5.46104e-10	2.67076e-08	10.2752	BnaC04g52580D;BnaC09g20370D;BnaA05g10480D;BnaA09g32380D;BnaA05g03050D;BnaC04g28570D;BnaC07g28040D;BnaA09g18440D;BnaA05g33880D;BnaA07g08220D;BnaA03g15290D;BnaA05g03080D;BnaC04g11470D;BnaC07g34380D
GO0016151	nickel cation binding	7	490	20	47438	8.29669e-10	3.91e-08	52.3244	BnaC02g45160D;BnaC05g15780D;BnaA07g11450D;BnaC09g08130D;BnaC07g15380D;BnaA09g07980D;BnaCnng27850D
GO0070401	NADP+ binding	7	490	20	47438	8.29669e-10	3.91e-08	52.3244	BnaA03g17400D;BnaC04g53560D;BnaC04g53550D;BnaC03g72040D;BnaC04g53580D;BnaAnng30320D;BnaA05g34880D
GO0003676	nucleic acid binding	31	490	7227	47438	1.37608e-09	6.36928e-08	0.373093	BnaA05g12950D;BnaC01g01940D;BnaCnng27210D;BnaC05g38410D;BnaC04g07760D;BnaAnng23990D;BnaCnng27950D;BnaC08g31770D;BnaC07g50310D;BnaC04g50970D;BnaA05g01190D;BnaA09g29060D;BnaA08g18790D;BnaAnng01320D;BnaA01g26030D;BnaC03g58080D;BnaC03g39000D;BnaC06g38360D;BnaAnng26200D;BnaC04g01070D;BnaCnng63660D;BnaC02g26030D;BnaC04g00750D;BnaA05g21090D;BnaC05g33960D;BnaC06g19560D;BnaA01g00920D;BnaC05g21480D;BnaC06g…
GO0044428	obsolete nuclear part	16	490	4974	47438	3.01893e-09	1.37282e-07	0.285878	BnaC05g31460D;BnaC04g07710D;BnaCnng27210D;BnaC05g38410D;BnaC04g07760D;BnaA05g10480D;BnaA06g24600D;BnaC02g48590D;BnaC03g39000D;BnaCnng63660D;BnaA03g15290D;BnaA05g21090D;BnaC04g11470D;BnaC05g33960D;BnaA06g28310D;BnaA05g20100D
GO0004033	aldo-keto reductase (NADP) activity	8	490	38	47438	4.56194e-09	2.03871e-07	25.9574	BnaA03g17400D;BnaC04g53560D;BnaC04g53550D;BnaC03g72040D;BnaC04g53580D;BnaA04g00820D;BnaAnng30320D;BnaA05g34880D
GO0009788	negative regulation of abscisic acid-activated signaling pathway	15	490	210	47438	6.53206e-09	2.77559e-07	7.57134	BnaC05g41830D;BnaAnng23920D;BnaC09g34350D;BnaA05g27660D;BnaA07g30430D;BnaC01g18020D;BnaA01g37370D;BnaA01g15250D;BnaC06g33910D;BnaA03g47830D;BnaA10g15140D;BnaA10g12140D;BnaC07g40100D;BnaC01g06260D;BnaC09g37480D
GO1901420	negative regulation of response to alcohol	15	490	210	47438	6.53206e-09	2.77559e-07	7.57134	BnaC05g41830D;BnaAnng23920D;BnaC09g34350D;BnaA05g27660D;BnaA07g30430D;BnaC01g18020D;BnaA01g37370D;BnaA01g15250D;BnaC06g33910D;BnaA03g47830D;BnaA10g15140D;BnaA10g12140D;BnaC07g40100D;BnaC01g06260D;BnaC09g37480D
GO1905958	negative regulation of cellular response to alcohol	15	490	210	47438	6.53206e-09	2.77559e-07	7.57134	BnaC05g41830D;BnaAnng23920D;BnaC09g34350D;BnaA05g27660D;BnaA07g30430D;BnaC01g18020D;BnaA01g37370D;BnaA01g15250D;BnaC06g33910D;BnaA03g47830D;BnaA10g15140D;BnaA10g12140D;BnaC07g40100D;BnaC01g06260D;BnaC09g37480D
GO0009620	response to fungus	36	490	1158	47438	6.77634e-09	2.83295e-07	3.23866	BnaAnng17910D;BnaA03g13650D;BnaC07g11810D;BnaA07g08700D;BnaC04g07760D;BnaC07g36050D;BnaA01g06490D;BnaAnng23990D;BnaA06g24600D;BnaA03g26220D;BnaC03g73200D;BnaC01g03320D;BnaC04g40810D;BnaCnng07500D;BnaA06g15030D;BnaA03g50170D;BnaCnng09200D;BnaA03g13640D;BnaA04g17200D;BnaA08g18690D;BnaA05g33880D;BnaC08g26910D;BnaC01g07710D;BnaA05g12330D;BnaC03g16540D;BnaA07g17230D;BnaA09g47670D;BnaC08g48460D;BnaA06g…
GO0009064	glutamine family amino acid metabolic process	13	490	153	47438	8.38755e-09	3.45088e-07	9.11207	BnaA05g05760D;BnaCnng33690D;BnaC03g04830D;BnaC03g74750D;BnaC03g28300D;BnaA06g22040D;BnaA07g35920D;BnaA03g03400D;BnaA03g23800D;BnaC04g05620D;BnaA06g36140D;BnaC07g18960D;BnaA01g24820D
GO0034440	lipid oxidation	14	490	183	47438	8.69957e-09	3.52332e-07	8.14114	BnaC04g52580D;BnaC09g20370D;BnaA05g10480D;BnaA09g32380D;BnaA05g03050D;BnaC04g28570D;BnaC07g28040D;BnaA09g18440D;BnaA05g33880D;BnaA07g08220D;BnaA03g15290D;BnaA05g03080D;BnaC04g11470D;BnaC07g34380D
GO0043436	oxoacid metabolic process	63	490	2835	47438	1.31424e-08	5.16619e-07	2.35129	BnaC04g52580D;BnaA10g18700D;BnaC09g20370D;BnaCnng37100D;BnaC07g35800D;BnaC03g24530D;BnaA01g03680D;BnaA05g10480D;BnaA06g13760D;BnaA05g05760D;BnaC07g33090D;BnaAnng19740D;BnaCnng33690D;BnaA09g32380D;BnaC01g05030D;BnaA03g50170D;BnaC03g04830D;BnaA05g03050D;BnaC04g28570D;BnaC02g13860D;BnaC07g28040D;BnaC05g06260D;BnaC03g74750D;BnaC03g28300D;BnaC02g44850D;BnaA09g18440D;BnaC01g01500D;BnaA05g33880D;BnaC07g…
GO0043169	cation binding	48	490	1879	47438	1.31877e-08	5.16619e-07	2.67591	BnaA09g13300D;BnaA03g00260D;BnaA09g09830D;BnaA05g29010D;BnaC03g00160D;BnaA08g06260D;BnaC02g45160D;BnaAnng04520D;BnaAnng20200D;BnaC04g00160D;BnaA03g40940D;BnaC05g43490D;BnaC07g15270D;BnaCnng37100D;BnaC02g48590D;BnaC08g17850D;BnaCnng33690D;BnaA08g22720D;BnaC05g15780D;BnaC03g34940D;BnaC07g25470D;BnaA07g11450D;BnaC03g74750D;BnaC03g28300D;BnaC02g44850D;BnaA06g38470D;BnaC09g08130D;BnaC09g16820D;BnaA06g…
GO0006082	organic acid metabolic process	63	490	2837	47438	1.3354e-08	5.16619e-07	2.34949	BnaC04g52580D;BnaA10g18700D;BnaC09g20370D;BnaCnng37100D;BnaC07g35800D;BnaC03g24530D;BnaA01g03680D;BnaA05g10480D;BnaA06g13760D;BnaA05g05760D;BnaC07g33090D;BnaAnng19740D;BnaCnng33690D;BnaA09g32380D;BnaC01g05030D;BnaA03g50170D;BnaC03g04830D;BnaA05g03050D;BnaC04g28570D;BnaC02g13860D;BnaC07g28040D;BnaC05g06260D;BnaC03g74750D;BnaC03g28300D;BnaC02g44850D;BnaA09g18440D;BnaC01g01500D;BnaA05g33880D;BnaC07g…
GO0005773	vacuole	69	490	3248	47438	1.3611e-08	5.18821e-07	2.25654	BnaC08g21320D;BnaA09g09830D;BnaA08g06260D;BnaAnng04520D;BnaCnng37450D;BnaA01g20660D;BnaC09g37560D;BnaA04g17560D;BnaC06g13300D;BnaCnng56610D;BnaC03g59660D;BnaC02g33350D;BnaA01g04780D;BnaC04g15750D;BnaA05g10480D;BnaA08g16310D;BnaA04g21850D;BnaC06g38200D;BnaC08g17850D;BnaC01g03320D;BnaAnng13010D;BnaCnng33690D;BnaCnng07500D;BnaA06g15030D;BnaC01g20120D;BnaA08g22720D;BnaA07g38000D;BnaA09g52260D;BnaC01g…
GO0031225	anchored component of membrane	25	490	634	47438	1.69255e-08	6.3581e-07	4.09088	BnaC07g11810D;BnaA07g08700D;BnaC09g37560D;BnaA09g42610D;BnaC03g47100D;BnaC04g25500D;BnaCnng07500D;BnaC01g20120D;BnaC02g13250D;BnaA02g34140D;BnaA04g00600D;BnaC08g26260D;BnaA04g03610D;BnaA08g18690D;BnaC09g42490D;BnaA10g15190D;BnaC07g50320D;BnaA01g16530D;BnaA07g17230D;BnaA06g23230D;BnaA03g22360D;BnaC04g21680D;BnaA02g33310D;BnaA09g27660D;BnaA02g09200D
GO0042335	cuticle development	10	490	88	47438	2.77409e-08	1.02721e-06	12.5187	BnaC07g11810D;BnaA07g08700D;BnaC04g45790D;BnaA08g18690D;BnaA04g22080D;BnaC04g06760D;BnaA09g27660D;BnaC06g04380D;BnaC04g45800D;BnaA06g02490D
GO0044281	small molecule metabolic process	83	490	4286	47438	2.93705e-08	1.07223e-06	2.074	BnaC04g52580D;BnaC03g58870D;BnaA10g18700D;BnaC09g20370D;BnaAnng34010D;BnaC08g28550D;BnaAnng20200D;BnaA04g17560D;BnaAnng10090D;BnaCnng37100D;BnaC07g35800D;BnaC03g24530D;BnaA01g03680D;BnaA05g10480D;BnaA06g13760D;BnaA06g24600D;BnaA05g05760D;BnaC07g33090D;BnaAnng19740D;BnaC07g23920D;BnaCnng33690D;BnaA09g32380D;BnaA02g31990D;BnaC01g05030D;BnaA03g50170D;BnaC03g04830D;BnaC01g00680D;BnaA05g03050D;BnaC02g…
GO0051128	regulation of cellular component organization	1	490	1955	47438	3.59284e-08	1.29342e-06	0.0470892	BnaC06g24340D
GO0009738	abscisic acid-activated signaling pathway	21	490	478	47438	3.91701e-08	1.39081e-06	4.55511	BnaA07g24330D;BnaA03g13650D;BnaC05g41830D;BnaAnng23920D;BnaA05g27660D;BnaA07g30430D;BnaC04g40810D;BnaA03g13640D;BnaA04g17200D;BnaA01g37370D;BnaA05g02510D;BnaC06g33910D;BnaC04g02270D;BnaA05g12330D;BnaC06g25430D;BnaC03g16540D;BnaA06g18440D;BnaC04g14780D;BnaC01g06260D;BnaC03g12400D;BnaC04g09800D
GO0044444	obsolete cytoplasmic part	285	490	21742	47438	4.00481e-08	1.40277e-06	1.65162	BnaC04g52580D;BnaC03g58870D;BnaA06g38950D;BnaA10g18700D;BnaAnng17910D;BnaA09g27040D;BnaA09g13300D;BnaC08g21320D;BnaC09g20370D;BnaA03g00260D;BnaA09g09830D;BnaA01g36810D;BnaC03g00160D;BnaA03g39660D;BnaAnng34010D;BnaA08g06260D;BnaC08g28550D;BnaA03g13650D;BnaC07g11810D;BnaC02g45160D;BnaA07g08700D;BnaC02g09390D;BnaAnng04520D;BnaCnng37450D;BnaA01g20660D;BnaA03g17400D;BnaA09g40670D;BnaC03g19520D;BnaAnng…
GO0009514	glyoxysome	9	490	69	47438	4.07236e-08	1.40741e-06	14.622	BnaC04g52580D;BnaA05g10480D;BnaA09g32380D;BnaA05g03050D;BnaC04g28570D;BnaA07g08220D;BnaA03g15290D;BnaA05g03080D;BnaC04g11470D
GO0005618	cell wall	50	490	2081	47438	4.26371e-08	1.43305e-06	2.51315	BnaA10g18700D;BnaA09g13300D;BnaA08g06260D;BnaC07g11810D;BnaA07g08700D;BnaAnng04520D;BnaAnng23050D;BnaCnng55020D;BnaA04g17560D;BnaC03g59270D;BnaC07g15270D;BnaC04g15750D;BnaAnng20740D;BnaC03g67980D;BnaA02g35330D;BnaCnng07500D;BnaA06g15030D;BnaC02g13250D;BnaC03g49920D;BnaCnng62150D;BnaA02g04990D;BnaA02g22470D;BnaC01g25430D;BnaC04g45790D;BnaA08g18690D;BnaC04g41120D;BnaC06g01490D;BnaA06g23380D;BnaA07g…
GO0034645	cellular macromolecule biosynthetic process	8	490	3380	47438	4.3041e-08	1.43305e-06	0.214488	BnaC05g14940D;BnaA09g29060D;BnaCnng63310D;BnaCnng63660D;BnaA05g21090D;BnaC05g33960D;BnaC06g04380D;BnaA06g02490D
GO0030312	external encapsulating structure	50	490	2082	47438	4.31241e-08	1.43305e-06	2.51186	BnaA10g18700D;BnaA09g13300D;BnaA08g06260D;BnaC07g11810D;BnaA07g08700D;BnaAnng04520D;BnaAnng23050D;BnaCnng55020D;BnaA04g17560D;BnaC03g59270D;BnaC07g15270D;BnaC04g15750D;BnaAnng20740D;BnaC03g67980D;BnaA02g35330D;BnaCnng07500D;BnaA06g15030D;BnaC02g13250D;BnaC03g49920D;BnaCnng62150D;BnaA02g04990D;BnaA02g22470D;BnaC01g25430D;BnaC04g45790D;BnaA08g18690D;BnaC04g41120D;BnaC06g01490D;BnaA06g23380D;BnaA07g…
GO0071435	potassium ion export across plasma membrane	4	490	5	47438	5.57698e-08	1.82981e-06	386.395	BnaA08g06260D;BnaAnng04520D;BnaC08g06690D;BnaC05g27530D
GO0046872	metal ion binding	45	490	1803	47438	6.81822e-08	2.2091e-06	2.59942	BnaA09g13300D;BnaA03g00260D;BnaA09g09830D;BnaA05g29010D;BnaC03g00160D;BnaA08g06260D;BnaC02g45160D;BnaAnng04520D;BnaAnng20200D;BnaA03g40940D;BnaC05g43490D;BnaC07g15270D;BnaCnng37100D;BnaC02g48590D;BnaC08g17850D;BnaCnng33690D;BnaA08g22720D;BnaC05g15780D;BnaC03g34940D;BnaC07g25470D;BnaA07g11450D;BnaC03g74750D;BnaC03g28300D;BnaC02g44850D;BnaA06g38470D;BnaC09g08130D;BnaC09g16820D;BnaA06g22040D;BnaCnng…
GO0046658	anchored component of plasma membrane	20	490	454	47438	7.89082e-08	2.50552e-06	4.56064	BnaC07g11810D;BnaA07g08700D;BnaC09g37560D;BnaC03g47100D;BnaC04g25500D;BnaCnng07500D;BnaC01g20120D;BnaC02g13250D;BnaC08g26260D;BnaA04g03610D;BnaA08g18690D;BnaC09g42490D;BnaA10g15190D;BnaC07g50320D;BnaA01g16530D;BnaA07g17230D;BnaA06g23230D;BnaA03g22360D;BnaA09g27660D;BnaA02g09200D
GO0051704	multi-organism process	92	490	5038	47438	7.92641e-08	2.50552e-06	1.963	BnaA06g38950D;BnaAnng17910D;BnaA03g00260D;BnaC03g00160D;BnaA03g13650D;BnaC07g11810D;BnaA07g08700D;BnaC02g09390D;BnaC09g37560D;BnaC03g59270D;BnaC05g38410D;BnaC03g21860D;BnaC04g07760D;BnaC07g36050D;BnaA01g06490D;BnaAnng23990D;BnaC08g31770D;BnaA06g24600D;BnaC04g50970D;BnaA03g26220D;BnaC03g73200D;BnaC01g03320D;BnaC04g40810D;BnaCnng33690D;BnaCnng57580D;BnaA05g01190D;BnaCnng07500D;BnaA06g15030D;BnaA10g…
GO0009617	response to bacterium	44	490	1751	47438	8.26595e-08	2.58137e-06	2.61467	BnaA06g38950D;BnaA03g00260D;BnaC03g00160D;BnaC02g09390D;BnaC05g38410D;BnaC03g21860D;BnaC04g07760D;BnaC07g36050D;BnaAnng23990D;BnaC01g03320D;BnaCnng07500D;BnaA10g14100D;BnaA03g50170D;BnaA09g29060D;BnaC01g28850D;BnaCnng09200D;BnaC03g28300D;BnaA06g13250D;BnaA03g60000D;BnaA09g41800D;BnaC05g14810D;BnaA05g33880D;BnaC02g15270D;BnaC03g39000D;BnaA02g05510D;BnaA06g18440D;BnaA03g23800D;BnaC08g36840D;BnaA07g…
GO0009631	cold acclimation	11	490	128	47438	1.04986e-07	3.23958e-06	9.19189	BnaC02g45160D;BnaCnng37450D;BnaA04g21850D;BnaC05g15780D;BnaA07g11450D;BnaC09g08130D;BnaA07g03740D;BnaC07g15380D;BnaC04g45720D;BnaA09g07980D;BnaCnng27850D
GO0005737	cytoplasm	323	490	25673	47438	1.11259e-07	3.39274e-06	1.64786	BnaC04g52580D;BnaC03g58870D;BnaA06g38950D;BnaA10g18700D;BnaCnng37520D;BnaAnng17910D;BnaA09g27040D;BnaA09g13300D;BnaC08g21320D;BnaC09g20370D;BnaA03g00260D;BnaA09g09830D;BnaA01g36810D;BnaC03g00160D;BnaA03g39660D;BnaAnng34010D;BnaA08g06260D;BnaC08g28550D;BnaA03g13650D;BnaC07g11810D;BnaC02g45160D;BnaA07g08700D;BnaC02g09390D;BnaAnng04520D;BnaCnng37450D;BnaA01g20660D;BnaA03g17400D;BnaA09g40670D;BnaC03g…
GO0016229	steroid dehydrogenase activity	7	490	38	47438	1.15023e-07	3.46673e-06	21.9341	BnaA03g17400D;BnaC04g53560D;BnaC04g53550D;BnaC03g72040D;BnaC04g53580D;BnaAnng30320D;BnaA05g34880D
GO1901575	organic substance catabolic process	72	490	3629	47438	1.20171e-07	3.56777e-06	2.10122	BnaC04g52580D;BnaA06g38950D;BnaCnng37520D;BnaA09g27040D;BnaC09g20370D;BnaC02g09390D;BnaAnng20200D;BnaA06g11500D;BnaCnng37100D;BnaA02g26610D;BnaA05g10480D;BnaA07g33240D;BnaA08g28620D;BnaC02g48590D;BnaCnng33690D;BnaCnng07500D;BnaA09g32380D;BnaA10g14100D;BnaA05g03050D;BnaC04g28570D;BnaAnng17870D;BnaC02g13860D;BnaC07g28040D;BnaC03g06000D;BnaC05g06260D;BnaC03g74750D;BnaC03g28300D;BnaC02g44850D;BnaA09g…
GO0044260	cellular macromolecule metabolic process	70	490	11364	47438	1.21128e-07	3.56777e-06	0.52615	BnaA06g38950D;BnaCnng37520D;BnaA03g13650D;BnaC02g09390D;BnaC05g31460D;BnaC05g41830D;BnaC07g36050D;BnaA05g29500D;BnaC08g13910D;BnaAnng23920D;BnaC09g34350D;BnaA02g26610D;BnaA10g11080D;BnaA07g33240D;BnaA06g13760D;BnaA08g28620D;BnaC02g48590D;BnaC05g14940D;BnaA05g27660D;BnaC01g03320D;BnaA07g30430D;BnaC04g40810D;BnaCnng07500D;BnaA06g15030D;BnaA10g14100D;BnaA01g06180D;BnaC03g67810D;BnaC01g18020D;BnaA09g…
GO0034641	cellular nitrogen compound metabolic process	48	490	8714	47438	1.52644e-07	4.44555e-06	0.479728	BnaC03g58870D;BnaA06g38950D;BnaA10g18700D;BnaA09g27040D;BnaAnng34010D;BnaC08g28550D;BnaC02g09390D;BnaAnng20200D;BnaA06g11500D;BnaCnng37100D;BnaA06g13760D;BnaC07g33090D;BnaA10g14100D;BnaA02g31990D;BnaA09g29060D;BnaC02g40580D;BnaC07g28040D;BnaC03g06000D;BnaC03g28300D;BnaA03g11410D;BnaC05g13120D;BnaC02g44850D;BnaC01g01500D;BnaC07g26280D;BnaC01g01490D;BnaA03g04460D;BnaA02g05510D;BnaA06g18440D;BnaA03g…
GO1901611	phosphatidylglycerol binding	4	490	6	47438	1.65938e-07	4.7544e-06	193.193	BnaC02g45160D;BnaC09g08130D;BnaA09g07980D;BnaCnng27850D
GO0006560	proline metabolic process	7	490	40	47438	1.66917e-07	4.7544e-06	20.6039	BnaA05g05760D;BnaC03g74750D;BnaA06g22040D;BnaA07g35920D;BnaC04g05620D;BnaA06g36140D;BnaC07g18960D
GO0044248	cellular catabolic process	71	490	3616	47438	1.92097e-07	5.41212e-06	2.07466	BnaC04g52580D;BnaA06g38950D;BnaCnng37520D;BnaA09g27040D;BnaC09g20370D;BnaC02g09390D;BnaAnng20200D;BnaA06g11500D;BnaC07g15270D;BnaCnng37100D;BnaA02g26610D;BnaA05g10480D;BnaA07g33240D;BnaA06g13760D;BnaA08g28620D;BnaC02g48590D;BnaC07g43770D;BnaCnng33690D;BnaCnng07500D;BnaA09g32380D;BnaA10g14100D;BnaA05g03050D;BnaC04g28570D;BnaAnng17870D;BnaC02g13860D;BnaC07g28040D;BnaC05g06260D;BnaC03g74750D;BnaC03g…
GO0009787	regulation of abscisic acid-activated signaling pathway	19	490	442	47438	2.42035e-07	6.60374e-06	4.43689	BnaC05g41830D;BnaAnng23920D;BnaC09g34350D;BnaA05g10480D;BnaA05g27660D;BnaA07g30430D;BnaC01g18020D;BnaC07g48820D;BnaA01g37370D;BnaA01g15250D;BnaC06g33910D;BnaA03g47830D;BnaA10g15140D;BnaA10g12140D;BnaC07g40100D;BnaC01g06260D;BnaA03g15290D;BnaC09g37480D;BnaC04g11470D
GO1901419	regulation of response to alcohol	19	490	442	47438	2.42035e-07	6.60374e-06	4.43689	BnaC05g41830D;BnaAnng23920D;BnaC09g34350D;BnaA05g10480D;BnaA05g27660D;BnaA07g30430D;BnaC01g18020D;BnaC07g48820D;BnaA01g37370D;BnaA01g15250D;BnaC06g33910D;BnaA03g47830D;BnaA10g15140D;BnaA10g12140D;BnaC07g40100D;BnaC01g06260D;BnaA03g15290D;BnaC09g37480D;BnaC04g11470D
GO1905957	regulation of cellular response to alcohol	19	490	442	47438	2.42035e-07	6.60374e-06	4.43689	BnaC05g41830D;BnaAnng23920D;BnaC09g34350D;BnaA05g10480D;BnaA05g27660D;BnaA07g30430D;BnaC01g18020D;BnaC07g48820D;BnaA01g37370D;BnaA01g15250D;BnaC06g33910D;BnaA03g47830D;BnaA10g15140D;BnaA10g12140D;BnaC07g40100D;BnaC01g06260D;BnaA03g15290D;BnaC09g37480D;BnaC04g11470D
GO0009056	catabolic process	77	490	4079	47438	2.47605e-07	6.68533e-06	2.00072	BnaC04g52580D;BnaA06g38950D;BnaCnng37520D;BnaA09g27040D;BnaC09g20370D;BnaC02g09390D;BnaAnng20200D;BnaA06g11500D;BnaC07g15270D;BnaCnng37100D;BnaA02g26610D;BnaA05g10480D;BnaA07g33240D;BnaA06g13760D;BnaA08g28620D;BnaC02g48590D;BnaC07g43770D;BnaCnng33690D;BnaCnng07500D;BnaA09g32380D;BnaA10g14100D;BnaA05g03050D;BnaC04g28570D;BnaAnng17870D;BnaC02g13860D;BnaC07g28040D;BnaC03g06000D;BnaC05g06260D;BnaC03g…
GO0043167	ion binding	67	490	3362	47438	2.99245e-07	7.99632e-06	2.09842	BnaA09g13300D;BnaA03g00260D;BnaA09g09830D;BnaA05g29010D;BnaC03g00160D;BnaA08g06260D;BnaC02g45160D;BnaAnng04520D;BnaA03g17400D;BnaAnng20200D;BnaA06g11500D;BnaC04g00160D;BnaA03g40940D;BnaC05g43490D;BnaC07g15270D;BnaC04g53560D;BnaC04g53550D;BnaCnng37100D;BnaA06g13760D;BnaC02g48590D;BnaC08g17850D;BnaAnng13010D;BnaAnng19740D;BnaC03g72040D;BnaCnng33690D;BnaA08g22720D;BnaC07g48820D;BnaC05g15780D;BnaC03g…
GO0010119	regulation of stomatal movement	17	490	365	47438	3.42705e-07	9.0642e-06	4.81276	BnaA09g27040D;BnaA09g09830D;BnaC05g41830D;BnaAnng23920D;BnaA10g11080D;BnaA05g27660D;BnaC01g18020D;BnaC09g53650D;BnaA01g37370D;BnaA01g15250D;BnaA03g47830D;BnaCnng44750D;BnaCnng37560D;BnaC02g39630D;BnaC07g40100D;BnaC06g04380D;BnaA06g02490D
GO0006527	arginine catabolic process	4	490	7	47438	3.84018e-07	1.00543e-05	128.793	BnaC03g28300D;BnaA03g23800D;BnaA06g36140D;BnaC07g18960D
GO0019752	carboxylic acid metabolic process	54	490	2514	47438	4.3125e-07	1.1178e-05	2.23983	BnaC04g52580D;BnaA10g18700D;BnaC09g20370D;BnaCnng37100D;BnaC07g35800D;BnaC03g24530D;BnaA01g03680D;BnaA05g10480D;BnaA06g13760D;BnaA05g05760D;BnaC07g33090D;BnaAnng19740D;BnaCnng33690D;BnaA09g32380D;BnaC01g05030D;BnaA03g50170D;BnaC03g04830D;BnaA05g03050D;BnaC04g28570D;BnaC02g13860D;BnaC07g28040D;BnaC05g06260D;BnaC03g74750D;BnaC03g28300D;BnaC02g44850D;BnaA09g18440D;BnaA05g33880D;BnaA06g22040D;BnaA07g…
GO0048037	obsolete cofactor binding	24	490	706	47438	4.88427e-07	1.25347e-05	3.49384	BnaA09g27040D;BnaA03g17400D;BnaA06g11500D;BnaC07g15270D;BnaC04g53560D;BnaC04g53550D;BnaA06g13760D;BnaAnng19740D;BnaC03g72040D;BnaC03g06000D;BnaC04g53580D;BnaAnng30320D;BnaA05g34880D;BnaA03g04460D;BnaA09g53100D;BnaC02g10080D;BnaC01g34640D;BnaA04g29550D;BnaA06g36140D;BnaC05g15180D;BnaC07g18960D;BnaC03g45280D;BnaA01g27800D;BnaC08g37940D
GO0016311	dephosphorylation	25	490	771	47438	6.69325e-07	1.70087e-05	3.32973	BnaA03g13650D;BnaC05g41830D;BnaAnng23920D;BnaC09g34350D;BnaA10g11080D;BnaA05g27660D;BnaA07g30430D;BnaC04g40810D;BnaC01g18020D;BnaC09g53650D;BnaA03g13640D;BnaA04g17200D;BnaC02g39950D;BnaA01g37370D;BnaA01g15250D;BnaC06g33910D;BnaA03g47830D;BnaC07g21340D;BnaA05g12330D;BnaC03g16540D;BnaA10g12140D;BnaC07g40100D;BnaA06g34450D;BnaC04g14780D;BnaA09g33210D
GO0071215	cellular response to abscisic acid stimulus	21	490	569	47438	6.91262e-07	1.73956e-05	3.79126	BnaA07g24330D;BnaA03g13650D;BnaC05g41830D;BnaAnng23920D;BnaA05g27660D;BnaA07g30430D;BnaC04g40810D;BnaA03g13640D;BnaA04g17200D;BnaA01g37370D;BnaA05g02510D;BnaC06g33910D;BnaC04g02270D;BnaA05g12330D;BnaC06g25430D;BnaC03g16540D;BnaA06g18440D;BnaC04g14780D;BnaC01g06260D;BnaC03g12400D;BnaC04g09800D
GO0097306	cellular response to alcohol	21	490	570	47438	7.10947e-07	1.7719e-05	3.78428	BnaA07g24330D;BnaA03g13650D;BnaC05g41830D;BnaAnng23920D;BnaA05g27660D;BnaA07g30430D;BnaC04g40810D;BnaA03g13640D;BnaA04g17200D;BnaA01g37370D;BnaA05g02510D;BnaC06g33910D;BnaC04g02270D;BnaA05g12330D;BnaC06g25430D;BnaC03g16540D;BnaA06g18440D;BnaC04g14780D;BnaC01g06260D;BnaC03g12400D;BnaC04g09800D
GO0016791	phosphatase activity	24	490	729	47438	8.58496e-07	2.11926e-05	3.37818	BnaA03g13650D;BnaC05g41830D;BnaAnng23920D;BnaC09g34350D;BnaA10g11080D;BnaA05g27660D;BnaA07g30430D;BnaC04g40810D;BnaC01g18020D;BnaC09g53650D;BnaA03g13640D;BnaA04g17200D;BnaA01g37370D;BnaA01g15250D;BnaC06g33910D;BnaA03g47830D;BnaC07g21340D;BnaA05g12330D;BnaC03g16540D;BnaA10g12140D;BnaC07g40100D;BnaA06g34450D;BnaC04g14780D;BnaA09g33210D
GO0009505	plant-type cell wall	28	490	946	47438	8.74553e-07	2.13853e-05	3.03889	BnaC07g11810D;BnaA07g08700D;BnaAnng23050D;BnaCnng55020D;BnaA04g17560D;BnaC03g67980D;BnaA06g15030D;BnaC02g13250D;BnaC03g49920D;BnaA02g04990D;BnaA02g22470D;BnaC01g25430D;BnaC04g45790D;BnaA08g18690D;BnaC04g41120D;BnaA06g23380D;BnaA07g04700D;BnaC06g32660D;BnaC04g53030D;BnaC01g19760D;BnaA04g22080D;BnaA05g03420D;BnaA01g17170D;BnaC04g06760D;BnaA02g23870D;BnaA09g27660D;BnaA02g09200D;BnaC04g45800D
GO1901605	alpha-amino acid metabolic process	23	490	679	47438	8.97247e-07	2.17352e-05	3.47547	BnaA01g03680D;BnaA05g05760D;BnaCnng33690D;BnaC01g05030D;BnaC03g04830D;BnaC02g13860D;BnaC05g06260D;BnaC03g74750D;BnaC03g28300D;BnaA06g22040D;BnaA07g35920D;BnaA03g03400D;BnaA03g23800D;BnaC02g13840D;BnaA02g09890D;BnaA09g53100D;BnaC04g05620D;BnaA06g36140D;BnaC07g18960D;BnaA01g24820D;BnaCnng72260D;BnaA02g09960D;BnaA06g38800D
GO0010200	response to chitin	20	490	535	47438	1.04425e-06	2.50621e-05	3.83665	BnaCnng37520D;BnaC03g52080D;BnaC05g38410D;BnaAnng23990D;BnaA06g31640D;BnaC08g24010D;BnaA08g18790D;BnaA06g21470D;BnaA01g26030D;BnaC03g58080D;BnaC03g52390D;BnaC03g39000D;BnaA07g15770D;BnaC08g26910D;BnaA06g18440D;BnaA05g28580D;BnaC02g26030D;BnaC06g19560D;BnaC05g21480D;BnaC04g43980D
GO0016746	transferase activity, transferring acyl groups	26	490	849	47438	1.15729e-06	2.75203e-05	3.14045	BnaC04g52580D;BnaC09g20370D;BnaC03g19520D;BnaC05g42570D;BnaC06g12160D;BnaA05g10480D;BnaA03g16250D;BnaA05g12980D;BnaC07g23920D;BnaA05g03050D;BnaA09g28510D;BnaC03g34940D;BnaA09g18440D;BnaC05g00780D;BnaA01g29130D;BnaA06g32640D;BnaA07g08220D;BnaCnng63660D;BnaA10g02480D;BnaAnng26570D;BnaA03g15290D;BnaA05g03080D;BnaA05g21090D;BnaC04g11470D;BnaC05g33960D;BnaA03g29700D
GO0042578	phosphoric ester hydrolase activity	26	490	851	47438	1.20829e-06	2.84717e-05	3.1327	BnaC03g58870D;BnaA03g13650D;BnaC05g41830D;BnaAnng23920D;BnaC09g34350D;BnaA10g11080D;BnaA05g27660D;BnaA07g30430D;BnaC04g40810D;BnaC01g18020D;BnaC09g53650D;BnaA03g13640D;BnaA04g17200D;BnaA01g37370D;BnaA01g15250D;BnaC06g33910D;BnaA03g47830D;BnaC07g21340D;BnaA05g12330D;BnaC03g16540D;BnaA10g12140D;BnaC07g40100D;BnaA06g34450D;BnaC04g14780D;BnaA09g33210D;BnaC03g12400D
GO0042538	hyperosmotic salinity response	13	490	235	47438	1.24557e-06	2.90857e-05	5.73628	BnaA05g05760D;BnaAnng13010D;BnaA01g06180D;BnaC03g67810D;BnaC01g07450D;BnaA01g26030D;BnaC02g15270D;BnaC07g39210D;BnaA08g12770D;BnaC04g05620D;BnaA06g36140D;BnaC07g18960D;BnaA02g10970D
GO0031981	nuclear lumen	16	490	4213	47438	1.28798e-06	2.98075e-05	0.343834	BnaC05g31460D;BnaC04g07710D;BnaCnng27210D;BnaC05g38410D;BnaC04g07760D;BnaA05g10480D;BnaA06g24600D;BnaC02g48590D;BnaC03g39000D;BnaCnng63660D;BnaA03g15290D;BnaA05g21090D;BnaC04g11470D;BnaC05g33960D;BnaA06g28310D;BnaA05g20100D
GO0005794	Golgi apparatus	60	490	2999	47438	1.33466e-06	3.06144e-05	2.08942	BnaA09g13300D;BnaC08g21320D;BnaA09g09830D;BnaC07g11810D;BnaA07g08700D;BnaA09g40670D;BnaAnng23050D;BnaA04g17560D;BnaA01g04780D;BnaAnng10090D;BnaC09g34350D;BnaA03g24720D;BnaC05g14940D;BnaC06g38200D;BnaC09g40960D;BnaC03g67980D;BnaC08g49040D;BnaA02g35330D;BnaCnng33690D;BnaC03g49920D;BnaC08g08130D;BnaA03g50170D;BnaC01g10130D;BnaC07g48820D;BnaA02g22470D;BnaC04g45790D;BnaA08g18690D;BnaA09g41800D;BnaA05g…
GO0009642	response to light intensity	20	490	544	47438	1.34709e-06	3.06286e-05	3.77002	BnaAnng17910D;BnaC09g37560D;BnaC04g07710D;BnaA10g11080D;BnaA08g28620D;BnaA03g26220D;BnaC06g38200D;BnaC03g73200D;BnaC03g48070D;BnaA08g18790D;BnaC09g53650D;BnaC03g34940D;BnaC03g58080D;BnaC03g52390D;BnaA06g25550D;BnaA10g15190D;BnaA07g33590D;BnaA03g29700D;BnaCnng72260D;BnaC05g21480D
GO0003988	acetyl-CoA C-acyltransferase activity	5	490	20	47438	1.57158e-06	3.54221e-05	32.2564	BnaC09g20370D;BnaA05g10480D;BnaA09g18440D;BnaA03g15290D;BnaC04g11470D
GO0009968	negative regulation of signal transduction	22	490	653	47438	1.6888e-06	3.77359e-05	3.45055	BnaA09g40670D;BnaC05g41830D;BnaC05g38410D;BnaAnng23920D;BnaC09g34350D;BnaA05g27660D;BnaA07g30430D;BnaC08g49040D;BnaC01g18020D;BnaA01g37370D;BnaA01g15250D;BnaA05g02510D;BnaC03g39000D;BnaC06g33910D;BnaA03g47830D;BnaA10g15140D;BnaC04g02270D;BnaA10g12140D;BnaC07g40100D;BnaC01g06260D;BnaC09g37480D;BnaA06g27640D
GO0071229	cellular response to acid chemical	37	490	1527	47438	2.04982e-06	4.54114e-05	2.49188	BnaA09g13300D;BnaA07g24330D;BnaA03g13650D;BnaCnng37450D;BnaC05g41830D;BnaC05g38410D;BnaAnng23920D;BnaA03g26220D;BnaA05g27660D;BnaC03g73200D;BnaA07g30430D;BnaC04g40810D;BnaA03g13640D;BnaCnng63310D;BnaA04g17200D;BnaA01g37370D;BnaA06g13250D;BnaA05g02510D;BnaC05g14810D;BnaA05g33880D;BnaC03g39000D;BnaC06g33910D;BnaA07g03740D;BnaC04g02270D;BnaA05g12330D;BnaC06g25430D;BnaC03g16540D;BnaA06g18440D;BnaC08g…
GO0006972	hyperosmotic response	14	490	286	47438	2.07485e-06	4.55763e-05	5.04715	BnaA05g05760D;BnaAnng13010D;BnaA01g06180D;BnaC03g67810D;BnaC01g07450D;BnaA01g26030D;BnaC02g15270D;BnaC07g39210D;BnaA07g35920D;BnaA08g12770D;BnaC04g05620D;BnaA06g36140D;BnaC07g18960D;BnaA02g10970D
GO0031974	membrane-enclosed lumen	21	490	4818	47438	2.57092e-06	5.50729e-05	0.393446	BnaC05g31460D;BnaC04g07710D;BnaCnng27210D;BnaC05g38410D;BnaC04g07760D;BnaA05g10480D;BnaA06g24600D;BnaC02g48590D;BnaC06g38200D;BnaC03g34940D;BnaC03g39000D;BnaCnng63660D;BnaA03g15290D;BnaA07g33590D;BnaA05g21090D;BnaC04g11470D;BnaC05g33960D;BnaA06g28310D;BnaA03g29700D;BnaA05g20100D;BnaA06g38800D
GO0043233	organelle lumen	21	490	4818	47438	2.57092e-06	5.50729e-05	0.393446	BnaC05g31460D;BnaC04g07710D;BnaCnng27210D;BnaC05g38410D;BnaC04g07760D;BnaA05g10480D;BnaA06g24600D;BnaC02g48590D;BnaC06g38200D;BnaC03g34940D;BnaC03g39000D;BnaCnng63660D;BnaA03g15290D;BnaA07g33590D;BnaA05g21090D;BnaC04g11470D;BnaC05g33960D;BnaA06g28310D;BnaA03g29700D;BnaA05g20100D;BnaA06g38800D
GO0070013	intracellular organelle lumen	21	490	4818	47438	2.57092e-06	5.50729e-05	0.393446	BnaC05g31460D;BnaC04g07710D;BnaCnng27210D;BnaC05g38410D;BnaC04g07760D;BnaA05g10480D;BnaA06g24600D;BnaC02g48590D;BnaC06g38200D;BnaC03g34940D;BnaC03g39000D;BnaCnng63660D;BnaA03g15290D;BnaA07g33590D;BnaA05g21090D;BnaC04g11470D;BnaC05g33960D;BnaA06g28310D;BnaA03g29700D;BnaA05g20100D;BnaA06g38800D
GO0046914	transition metal ion binding	32	490	1246	47438	3.00062e-06	6.3751e-05	2.63212	BnaA09g13300D;BnaA03g00260D;BnaA05g29010D;BnaC03g00160D;BnaA08g06260D;BnaC02g45160D;BnaAnng04520D;BnaAnng20200D;BnaC05g43490D;BnaC07g15270D;BnaC02g48590D;BnaCnng33690D;BnaC05g15780D;BnaC03g34940D;BnaA07g11450D;BnaC03g74750D;BnaC03g28300D;BnaC09g08130D;BnaA06g22040D;BnaC08g06690D;BnaA03g23800D;BnaAnng13720D;BnaAnng11680D;BnaC05g27530D;BnaA06g36140D;BnaC07g18960D;BnaA01g24820D;BnaC07g15380D;BnaA03g…
GO0009451	RNA modification	1	490	1503	47438	3.58152e-06	7.54741e-05	0.0618752	BnaC07g27620D
GO0050661	NADP binding	7	490	62	47438	3.62014e-06	7.56727e-05	12.3565	BnaA03g17400D;BnaC04g53560D;BnaC04g53550D;BnaC03g72040D;BnaC04g53580D;BnaAnng30320D;BnaA05g34880D
GO0006536	glutamate metabolic process	8	490	88	47438	3.81857e-06	7.91819e-05	9.72365	BnaCnng33690D;BnaC03g04830D;BnaC03g74750D;BnaA06g22040D;BnaA03g03400D;BnaA06g36140D;BnaC07g18960D;BnaA01g24820D
GO0042742	defense response to bacterium	35	490	1446	47438	4.03789e-06	8.30652e-05	2.48253	BnaA06g38950D;BnaC02g09390D;BnaC05g38410D;BnaC03g21860D;BnaC04g07760D;BnaC07g36050D;BnaAnng23990D;BnaC01g03320D;BnaA10g14100D;BnaA03g50170D;BnaA09g29060D;BnaC01g28850D;BnaCnng09200D;BnaC03g28300D;BnaA06g13250D;BnaA09g41800D;BnaC05g14810D;BnaA05g33880D;BnaC03g39000D;BnaA02g05510D;BnaA03g23800D;BnaC08g36840D;BnaC02g26030D;BnaC07g42640D;BnaC03g27140D;BnaA02g04260D;BnaC03g12400D;BnaA06g36140D;BnaC07g…
GO0050662	obsolete coenzyme binding	15	490	347	47438	4.14837e-06	8.38573e-05	4.43399	BnaA03g17400D;BnaC04g53560D;BnaC04g53550D;BnaAnng19740D;BnaC03g72040D;BnaC03g06000D;BnaC04g53580D;BnaAnng30320D;BnaA05g34880D;BnaA03g04460D;BnaA09g53100D;BnaC02g10080D;BnaA06g36140D;BnaC07g18960D;BnaC03g45280D
GO0010648	negative regulation of cell communication	22	490	691	47438	4.17345e-06	8.38573e-05	3.25188	BnaA09g40670D;BnaC05g41830D;BnaC05g38410D;BnaAnng23920D;BnaC09g34350D;BnaA05g27660D;BnaA07g30430D;BnaC08g49040D;BnaC01g18020D;BnaA01g37370D;BnaA01g15250D;BnaA05g02510D;BnaC03g39000D;BnaC06g33910D;BnaA03g47830D;BnaA10g15140D;BnaC04g02270D;BnaA10g12140D;BnaC07g40100D;BnaC01g06260D;BnaC09g37480D;BnaA06g27640D
GO0023057	negative regulation of signaling	22	490	691	47438	4.17345e-06	8.38573e-05	3.25188	BnaA09g40670D;BnaC05g41830D;BnaC05g38410D;BnaAnng23920D;BnaC09g34350D;BnaA05g27660D;BnaA07g30430D;BnaC08g49040D;BnaC01g18020D;BnaA01g37370D;BnaA01g15250D;BnaA05g02510D;BnaC03g39000D;BnaC06g33910D;BnaA03g47830D;BnaA10g15140D;BnaC04g02270D;BnaA10g12140D;BnaC07g40100D;BnaC01g06260D;BnaC09g37480D;BnaA06g27640D
GO1990904	ribonucleoprotein complex	6	490	2454	47438	4.92815e-06	9.82596e-05	0.225348	BnaA06g38950D;BnaC02g09390D;BnaC07g15270D;BnaA10g14100D;BnaC05g00780D;BnaA02g05510D
GO0032787	monocarboxylic acid metabolic process	30	490	1166	47438	5.91347e-06	0.000116169	2.63005	BnaC04g52580D;BnaC09g20370D;BnaCnng37100D;BnaC07g35800D;BnaC03g24530D;BnaA05g10480D;BnaC07g33090D;BnaAnng19740D;BnaCnng33690D;BnaA09g32380D;BnaA03g50170D;BnaA05g03050D;BnaC04g28570D;BnaC07g28040D;BnaC02g44850D;BnaA09g18440D;BnaA05g33880D;BnaC02g13840D;BnaA02g09890D;BnaA07g08220D;BnaC06g34480D;BnaC04g28590D;BnaA06g18900D;BnaC07g42640D;BnaA03g15290D;BnaA01g24820D;BnaA05g03080D;BnaC04g11470D;BnaCnng…
GO0006996	organelle organization	25	490	5231	47438	5.916e-06	0.000116169	0.431078	BnaAnng34010D;BnaC05g31460D;BnaC04g07710D;BnaCnng27210D;BnaA01g04780D;BnaC09g34350D;BnaA03g24720D;BnaA07g18900D;BnaC08g13040D;BnaA05g10480D;BnaA08g28620D;BnaA02g31990D;BnaC02g40580D;BnaC02g39950D;BnaA08g30600D;BnaA10g12140D;BnaC03g08040D;BnaCnng63660D;BnaA06g21560D;BnaA03g15290D;BnaA05g21090D;BnaC04g11470D;BnaC05g33960D;BnaCnng13410D;BnaA05g20100D
GO0010360	negative regulation of anion channel activity	4	490	13	47438	7.46761e-06	0.000144448	42.9255	BnaC05g41830D;BnaAnng23920D;BnaA05g27660D;BnaA01g37370D
GO1903960	negative regulation of anion transmembrane transport	4	490	13	47438	7.46761e-06	0.000144448	42.9255	BnaC05g41830D;BnaAnng23920D;BnaA05g27660D;BnaA01g37370D
GO0005774	vacuolar membrane	40	490	1814	47438	8.09905e-06	0.000155502	2.26351	BnaC08g21320D;BnaA08g06260D;BnaAnng04520D;BnaA01g20660D;BnaA04g17560D;BnaC06g13300D;BnaCnng56610D;BnaC03g59660D;BnaA01g04780D;BnaA05g10480D;BnaA08g16310D;BnaA04g21850D;BnaC06g38200D;BnaAnng13010D;BnaCnng33690D;BnaA09g52260D;BnaC04g51630D;BnaC04g41120D;BnaC01g26220D;BnaA08g30600D;BnaA06g01060D;BnaA09g34030D;BnaC08g06690D;BnaAnng13720D;BnaA05g14600D;BnaC04g28590D;BnaA04g23730D;BnaC02g39630D;BnaCnng…
GO0010468	regulation of gene expression	50	490	8289	47438	8.65214e-06	0.0001649	0.533894	BnaA06g38950D;BnaA05g12950D;BnaA06g02010D;BnaC02g09390D;BnaC05g31460D;BnaC01g01940D;BnaC04g07710D;BnaCnng27210D;BnaC03g52080D;BnaC05g38410D;BnaC04g07760D;BnaA05g29500D;BnaAnng23990D;BnaC08g31770D;BnaC04g50970D;BnaC06g05930D;BnaA05g01190D;BnaA10g14100D;BnaA08g18790D;BnaA06g21470D;BnaAnng01320D;BnaC06g05090D;BnaA01g26030D;BnaC03g58080D;BnaC03g52390D;BnaC03g39000D;BnaC06g38360D;BnaC08g26910D;BnaAnng…
GO0006561	proline biosynthetic process	5	490	28	47438	9.30584e-06	0.000176064	21.0332	BnaA05g05760D;BnaA07g35920D;BnaC04g05620D;BnaA06g36140D;BnaC07g18960D
GO0004108	citrate (Si)-synthase activity	4	490	14	47438	1.03692e-05	0.000190617	38.6321	BnaC04g52580D;BnaA05g03050D;BnaA07g08220D;BnaA05g03080D
GO0006649	phospholipid transfer to membrane	4	490	14	47438	1.03692e-05	0.000190617	38.6321	BnaC04g45790D;BnaA04g22080D;BnaC04g06760D;BnaC04g45800D
GO0036440	citrate synthase activity	4	490	14	47438	1.03692e-05	0.000190617	38.6321	BnaC04g52580D;BnaA05g03050D;BnaA07g08220D;BnaA05g03080D
GO1900067	regulation of cellular response to alkaline pH	4	490	14	47438	1.03692e-05	0.000190617	38.6321	BnaA06g13250D;BnaC05g14810D;BnaC08g36840D;BnaA09g44300D
GO0009059	macromolecule biosynthetic process	14	490	3603	47438	1.0592e-05	0.000193342	0.355326	BnaA10g18700D;BnaC08g21320D;BnaC05g14940D;BnaC08g08130D;BnaA09g29060D;BnaCnng63310D;BnaC07g12870D;BnaC01g26220D;BnaCnng63660D;BnaA05g21090D;BnaC05g33960D;BnaC09g42430D;BnaC06g04380D;BnaA06g02490D
GO1901136	carbohydrate derivative catabolic process	9	490	133	47438	1.09212e-05	0.000197956	7.06552	BnaAnng20200D;BnaC07g26280D;BnaC08g30370D;BnaC02g38400D;BnaA09g55500D;BnaA01g34980D;BnaC04g22420D;BnaA06g30390D;BnaA06g38800D
GO0044242	cellular lipid catabolic process	14	490	334	47438	1.21996e-05	0.000219593	4.28566	BnaC04g52580D;BnaC09g20370D;BnaA05g10480D;BnaA09g32380D;BnaA05g03050D;BnaC04g28570D;BnaC07g28040D;BnaA09g18440D;BnaA05g33880D;BnaA07g08220D;BnaA03g15290D;BnaA05g03080D;BnaC04g11470D;BnaC07g34380D
GO0006725	cellular aromatic compound metabolic process	49	490	8098	47438	1.25573e-05	0.000224472	0.536975	BnaC03g58870D;BnaA06g38950D;BnaA10g18700D;BnaA09g27040D;BnaAnng34010D;BnaC08g28550D;BnaC02g09390D;BnaAnng20200D;BnaA04g17560D;BnaA06g11500D;BnaCnng37100D;BnaC03g24530D;BnaC07g33090D;BnaA10g14100D;BnaA02g31990D;BnaC02g40580D;BnaC02g13860D;BnaC07g28040D;BnaA03g11410D;BnaC05g13120D;BnaC02g44850D;BnaC01g01500D;BnaC04g41120D;BnaC01g01490D;BnaC08g24280D;BnaA02g05510D;BnaA06g18440D;BnaA06g33900D;BnaC02g…
GO0016042	lipid catabolic process	14	490	341	47438	1.53685e-05	0.000272843	4.19329	BnaC04g52580D;BnaC09g20370D;BnaA05g10480D;BnaA09g32380D;BnaA05g03050D;BnaC04g28570D;BnaC07g28040D;BnaA09g18440D;BnaA05g33880D;BnaA07g08220D;BnaA03g15290D;BnaA05g03080D;BnaC04g11470D;BnaC07g34380D
GO0044437	obsolete vacuolar part	40	490	1850	47438	1.60391e-05	0.000282813	2.21672	BnaC08g21320D;BnaA08g06260D;BnaAnng04520D;BnaA01g20660D;BnaA04g17560D;BnaC06g13300D;BnaCnng56610D;BnaC03g59660D;BnaA01g04780D;BnaA05g10480D;BnaA08g16310D;BnaA04g21850D;BnaC06g38200D;BnaAnng13010D;BnaCnng33690D;BnaA09g52260D;BnaC04g51630D;BnaC04g41120D;BnaC01g26220D;BnaA08g30600D;BnaA06g01060D;BnaA09g34030D;BnaC08g06690D;BnaAnng13720D;BnaA05g14600D;BnaC04g28590D;BnaA04g23730D;BnaC02g39630D;BnaCnng…
GO0005856	cytoskeleton	1	490	1371	47438	1.6463e-05	0.000286426	0.068034	BnaA06g21560D
GO0016747	transferase activity, transferring acyl groups other than amino-acyl groups	22	490	755	47438	1.64651e-05	0.000286426	2.96385	BnaC09g20370D;BnaC03g19520D;BnaC05g42570D;BnaC06g12160D;BnaA05g10480D;BnaA03g16250D;BnaA05g12980D;BnaC07g23920D;BnaA09g28510D;BnaC03g34940D;BnaA09g18440D;BnaC05g00780D;BnaA01g29130D;BnaA06g32640D;BnaCnng63660D;BnaA10g02480D;BnaAnng26570D;BnaA03g15290D;BnaA05g21090D;BnaC04g11470D;BnaC05g33960D;BnaA03g29700D
GO0006572	tyrosine catabolic process	4	490	16	47438	1.85464e-05	0.000318359	32.192	BnaC02g13860D;BnaC02g13840D;BnaA02g09890D;BnaA02g09960D
GO1903792	negative regulation of anion transport	4	490	16	47438	1.85464e-05	0.000318359	32.192	BnaC05g41830D;BnaAnng23920D;BnaA05g27660D;BnaA01g37370D
GO0050829	defense response to Gram-negative bacterium	6	490	55	47438	2.22473e-05	0.000379375	11.8652	BnaA03g50170D;BnaA09g41800D;BnaC07g42640D;BnaC03g27140D;BnaA03g23010D;BnaA09g41810D
GO0046483	heterocycle metabolic process	47	490	7690	47438	2.61295e-05	0.000442664	0.545605	BnaC03g58870D;BnaA06g38950D;BnaA10g18700D;BnaA09g27040D;BnaAnng34010D;BnaC08g28550D;BnaC02g09390D;BnaAnng20200D;BnaCnng37100D;BnaA05g05760D;BnaC07g33090D;BnaA10g14100D;BnaA02g31990D;BnaC02g40580D;BnaC02g13860D;BnaC07g28040D;BnaC03g74750D;BnaA03g11410D;BnaC05g13120D;BnaC02g44850D;BnaC01g01500D;BnaA06g22040D;BnaA07g35920D;BnaC01g01490D;BnaC08g24280D;BnaA02g05510D;BnaA06g18440D;BnaA06g33900D;BnaC01g…
GO0016408	C-acyltransferase activity	5	490	35	47438	2.89618e-05	0.000487461	16.123	BnaC09g20370D;BnaA05g10480D;BnaA09g18440D;BnaA03g15290D;BnaC04g11470D
GO0009961	response to 1-aminocyclopropane-1-carboxylic acid	4	490	18	47438	3.06754e-05	0.000512972	27.592	BnaC02g45160D;BnaC09g08130D;BnaA09g07980D;BnaCnng27850D
GO1901568	fatty acid derivative metabolic process	10	490	190	47438	3.20459e-05	0.000532455	5.41296	BnaC03g19520D;BnaC06g12160D;BnaA03g16250D;BnaA05g12980D;BnaCnng09200D;BnaA09g28510D;BnaC05g00780D;BnaA05g33880D;BnaCnng47950D;BnaA06g38800D
GO1901570	fatty acid derivative biosynthetic process	8	490	118	47438	3.31903e-05	0.000547957	7.06722	BnaC03g19520D;BnaC06g12160D;BnaA03g16250D;BnaA05g12980D;BnaCnng09200D;BnaA09g28510D;BnaC05g00780D;BnaA05g33880D
GO0034660	ncRNA metabolic process	1	490	1283	47438	3.42736e-05	0.000558757	0.0728444	BnaA04g07260D
GO0004519	endonuclease activity	1	490	1278	47438	3.42756e-05	0.000558757	0.0731376	BnaA04g07260D
GO0006807	nitrogen compound metabolic process	131	490	16861	47438	3.49369e-05	0.000565978	0.659093	BnaC03g58870D;BnaA06g38950D;BnaA10g18700D;BnaCnng37520D;BnaA09g27040D;BnaAnng34010D;BnaC08g28550D;BnaA03g13650D;BnaC02g09390D;BnaAnng20200D;BnaC05g31460D;BnaCnng55020D;BnaC05g41830D;BnaA06g11500D;BnaC07g36050D;BnaA05g29500D;BnaC08g13910D;BnaCnng37100D;BnaAnng23920D;BnaC09g34350D;BnaA02g26610D;BnaA10g11080D;BnaC03g24530D;BnaA01g03680D;BnaA07g33240D;BnaA06g13760D;BnaA05g05760D;BnaC07g33090D;BnaA08g…
GO0035671	enone reductase activity	3	490	7	47438	3.71726e-05	0.000598456	72.2957	BnaC08g11410D;BnaA01g13700D;BnaC01g16080D
GO0006631	fatty acid metabolic process	18	490	574	47438	3.7529e-05	0.000600463	3.18199	BnaC04g52580D;BnaC09g20370D;BnaCnng37100D;BnaA05g10480D;BnaA09g32380D;BnaA05g03050D;BnaC04g28570D;BnaC07g28040D;BnaC02g44850D;BnaA09g18440D;BnaA05g33880D;BnaA07g08220D;BnaC06g34480D;BnaA06g18900D;BnaA03g15290D;BnaA05g03080D;BnaC04g11470D;BnaC07g34380D
GO0016762	xyloglucanxyloglucosyl transferase activity	5	490	37	47438	3.8233e-05	0.000607975	15.1147	BnaAnng23050D;BnaC03g67980D;BnaA02g35330D;BnaA02g22470D;BnaA02g35250D
GO0005507	copper ion binding	16	490	472	47438	4.03504e-05	0.000637733	3.44156	BnaA09g13300D;BnaA05g29010D;BnaA08g06260D;BnaC02g45160D;BnaAnng04520D;BnaC05g43490D;BnaC05g15780D;BnaA07g11450D;BnaC09g08130D;BnaC08g06690D;BnaAnng13720D;BnaC05g27530D;BnaC07g15380D;BnaC03g45280D;BnaA09g07980D;BnaCnng27850D
GO0016857	racemase and epimerase activity, acting on carbohydrates and derivatives	6	490	63	47438	4.86355e-05	0.000764019	10.1981	BnaAnng10090D;BnaC01g15760D;BnaA03g50170D;BnaC07g18010D;BnaA01g13540D;BnaC07g42640D
GO1901658	glycosyl compound catabolic process	7	490	94	47438	5.67346e-05	0.00088588	7.80626	BnaAnng20200D;BnaC07g26280D;BnaC08g30370D;BnaC02g38400D;BnaA09g55500D;BnaC04g22420D;BnaA06g30390D
GO0009966	regulation of signal transduction	39	490	1893	47438	5.90918e-05	0.000913304	2.10328	BnaA09g40670D;BnaC05g41830D;BnaC05g38410D;BnaAnng23920D;BnaC09g34350D;BnaA05g10480D;BnaA06g13760D;BnaA05g27660D;BnaA07g30430D;BnaC08g49040D;BnaC01g18020D;BnaC07g48820D;BnaA01g37370D;BnaA01g15250D;BnaA06g13250D;BnaC05g13120D;BnaA05g02510D;BnaC03g52390D;BnaC05g14810D;BnaC03g39000D;BnaA08g17540D;BnaC06g33910D;BnaA03g47830D;BnaC08g37780D;BnaA10g15140D;BnaC04g02270D;BnaA08g23150D;BnaC08g36840D;BnaA10g…
GO0030258	lipid modification	14	490	386	47438	5.91956e-05	0.000913304	3.68248	BnaC04g52580D;BnaC09g20370D;BnaA05g10480D;BnaA09g32380D;BnaA05g03050D;BnaC04g28570D;BnaC07g28040D;BnaA09g18440D;BnaA05g33880D;BnaA07g08220D;BnaA03g15290D;BnaA05g03080D;BnaC04g11470D;BnaC07g34380D
GO0044273	sulfur compound catabolic process	8	490	130	47438	6.61769e-05	0.00101497	6.37045	BnaC07g26280D;BnaA09g53100D;BnaC08g30370D;BnaC02g38400D;BnaA09g55500D;BnaC04g22420D;BnaA06g30390D;BnaA06g38800D
GO0016145	S-glycoside catabolic process	6	490	67	47438	6.89922e-05	0.00102856	9.52859	BnaC07g26280D;BnaC08g30370D;BnaC02g38400D;BnaA09g55500D;BnaC04g22420D;BnaA06g30390D
GO0019759	glycosinolate catabolic process	6	490	67	47438	6.89922e-05	0.00102856	9.52859	BnaC07g26280D;BnaC08g30370D;BnaC02g38400D;BnaA09g55500D;BnaC04g22420D;BnaA06g30390D
GO0019762	glucosinolate catabolic process	6	490	67	47438	6.89922e-05	0.00102856	9.52859	BnaC07g26280D;BnaC08g30370D;BnaC02g38400D;BnaA09g55500D;BnaC04g22420D;BnaA06g30390D
GO0008483	transaminase activity	9	490	168	47438	6.90469e-05	0.00102856	5.5061	BnaCnng33690D;BnaC03g04830D;BnaC02g13860D;BnaA03g03400D;BnaA06g36140D;BnaC07g18960D;BnaA01g24820D;BnaC03g45280D;BnaA02g09960D
GO0016769	transferase activity, transferring nitrogenous groups	9	490	168	47438	6.90469e-05	0.00102856	5.5061	BnaCnng33690D;BnaC03g04830D;BnaC02g13860D;BnaA03g03400D;BnaA06g36140D;BnaC07g18960D;BnaA01g24820D;BnaC03g45280D;BnaA02g09960D
GO0044430	obsolete cytoskeletal part	1	490	1208	47438	7.22851e-05	0.00107065	0.0774978	BnaA06g21560D
GO0003714	transcription corepressor activity	8	490	132	47438	7.36964e-05	0.00108535	6.26743	BnaA06g13250D;BnaC05g14810D;BnaA08g17540D;BnaC08g37780D;BnaA08g23150D;BnaC08g36840D;BnaA09g44300D;BnaA02g15990D
GO0010243	response to organonitrogen compound	26	490	1069	47438	7.5594e-05	0.001107	2.46622	BnaCnng37520D;BnaC02g45160D;BnaC03g52080D;BnaC05g38410D;BnaAnng23990D;BnaA06g31640D;BnaC08g24010D;BnaA08g18790D;BnaA06g21470D;BnaA01g26030D;BnaC03g58080D;BnaC03g52390D;BnaC09g08130D;BnaC03g39000D;BnaA07g15770D;BnaC08g26910D;BnaA06g18440D;BnaC04g53030D;BnaA05g28580D;BnaC02g26030D;BnaA05g03420D;BnaC06g19560D;BnaC05g21480D;BnaC04g43980D;BnaA09g07980D;BnaCnng27850D
GO0004144	diacylglycerol O-acyltransferase activity	6	490	69	47438	8.14475e-05	0.00118602	9.2257	BnaC03g19520D;BnaC06g12160D;BnaA03g16250D;BnaA05g12980D;BnaC07g23920D;BnaA06g32640D
GO0072593	reactive oxygen species metabolic process	10	490	213	47438	8.36381e-05	0.00121011	4.79731	BnaC07g15270D;BnaA06g13760D;BnaA08g28620D;BnaC07g43770D;BnaC03g74750D;BnaA06g22040D;BnaAnng21860D;BnaC05g15180D;BnaAnng34290D;BnaA02g33450D
GO0005730	nucleolus	5	490	1957	47438	8.40353e-05	0.00121011	0.237642	BnaC04g07760D;BnaA05g10480D;BnaA06g24600D;BnaA03g15290D;BnaC04g11470D
GO0017144	drug metabolic process	29	490	1260	47438	8.83499e-05	0.00126521	2.33624	BnaA10g18700D;BnaC08g21320D;BnaAnng34010D;BnaC08g28550D;BnaC07g15270D;BnaCnng37100D;BnaC03g24530D;BnaA06g13760D;BnaC07g43770D;BnaC07g23920D;BnaCnng33690D;BnaA02g31990D;BnaC08g08130D;BnaC03g04830D;BnaC01g00680D;BnaC02g40580D;BnaC05g06260D;BnaA03g11410D;BnaC02g44850D;BnaC01g26220D;BnaA06g32640D;BnaA03g03400D;BnaA09g53100D;BnaC01g34640D;BnaC05g15180D;BnaA01g34980D;BnaA01g24820D;BnaC09g42430D;BnaA01g…
GO0009408	response to heat	21	490	791	47438	9.53763e-05	0.00135833	2.68529	BnaA08g06260D;BnaAnng04520D;BnaA05g29500D;BnaA10g11080D;BnaAnng20740D;BnaA07g33240D;BnaC03g16140D;BnaA02g35330D;BnaCnng62150D;BnaC01g18020D;BnaC09g53650D;BnaAnng01320D;BnaA01g15250D;BnaC09g27270D;BnaA03g47830D;BnaC08g06690D;BnaC05g43850D;BnaC07g40100D;BnaC05g27530D;BnaC01g41470D;BnaA02g35250D
GO0005777	peroxisome	18	490	620	47438	9.95911e-05	0.00140294	2.93593	BnaC04g52580D;BnaA03g39660D;BnaC07g15270D;BnaA07g18900D;BnaA05g10480D;BnaA09g32380D;BnaC03g04830D;BnaA05g03050D;BnaC04g28570D;BnaC07g28040D;BnaA03g03400D;BnaA07g08220D;BnaA05g28630D;BnaA03g15290D;BnaC05g43080D;BnaA05g03080D;BnaC04g11470D;BnaCnng13410D
GO0042579	microbody	18	490	620	47438	9.95911e-05	0.00140294	2.93593	BnaC04g52580D;BnaA03g39660D;BnaC07g15270D;BnaA07g18900D;BnaA05g10480D;BnaA09g32380D;BnaC03g04830D;BnaA05g03050D;BnaC04g28570D;BnaC07g28040D;BnaA03g03400D;BnaA07g08220D;BnaA05g28630D;BnaA03g15290D;BnaC05g43080D;BnaA05g03080D;BnaC04g11470D;BnaCnng13410D
GO0043649	dicarboxylic acid catabolic process	4	490	24	47438	0.000101417	0.00141534	19.3119	BnaCnng33690D;BnaC08g48460D;BnaA06g16270D;BnaA01g24820D
GO0006412	translation	1	490	1179	47438	0.000105708	0.00141534	0.079456	BnaA09g29060D
GO0004053	arginase activity	2	490	2	47438	0.000106478	0.00141534	inf	BnaC03g28300D;BnaA03g23800D
GO0008783	agmatinase activity	2	490	2	47438	0.000106478	0.00141534	inf	BnaC03g28300D;BnaA03g23800D
GO0009609	response to symbiotic bacterium	2	490	2	47438	0.000106478	0.00141534	inf	BnaC02g15270D;BnaA02g10970D
GO0015690	aluminum cation transport	2	490	2	47438	0.000106478	0.00141534	inf	BnaC09g37560D;BnaA10g15190D
GO0033388	putrescine biosynthetic process from arginine	2	490	2	47438	0.000106478	0.00141534	inf	BnaC03g28300D;BnaA03g23800D
GO0033389	putrescine biosynthetic process from arginine, using agmatinase	2	490	2	47438	0.000106478	0.00141534	inf	BnaC03g28300D;BnaA03g23800D
GO0072722	response to amitrole	2	490	2	47438	0.000106478	0.00141534	inf	BnaC04g53030D;BnaA05g03420D
GO1901405	negative regulation of tetrapyrrole catabolic process	2	490	2	47438	0.000106478	0.00141534	inf	BnaA03g24900D;BnaC03g72930D
GO1903647	negative regulation of chlorophyll catabolic process	2	490	2	47438	0.000106478	0.00141534	inf	BnaA03g24900D;BnaC03g72930D
GO0010025	wax biosynthetic process	7	490	104	47438	0.000107785	0.0014254	7	BnaC03g19520D;BnaC06g12160D;BnaA03g16250D;BnaA05g12980D;BnaCnng09200D;BnaA09g28510D;BnaC05g00780D
GO0019538	protein metabolic process	62	490	9171	47438	0.00011026	0.00145074	0.601751	BnaCnng37520D;BnaA03g13650D;BnaC05g31460D;BnaCnng55020D;BnaC05g41830D;BnaC07g36050D;BnaA05g29500D;BnaC08g13910D;BnaAnng23920D;BnaC09g34350D;BnaA02g26610D;BnaA10g11080D;BnaA07g33240D;BnaA06g13760D;BnaA08g28620D;BnaC02g48590D;BnaA05g27660D;BnaC01g03320D;BnaA07g30430D;BnaC04g40810D;BnaA06g15030D;BnaA01g06180D;BnaC03g67810D;BnaC01g18020D;BnaA09g29060D;BnaAnng17870D;BnaC01g28850D;BnaC09g53650D;BnaA03g…
GO0043412	macromolecule modification	51	490	7891	47438	0.000114914	0.00150433	0.579502	BnaCnng37520D;BnaA03g13650D;BnaC05g31460D;BnaC05g41830D;BnaC07g36050D;BnaA05g29500D;BnaC08g13910D;BnaAnng23920D;BnaC09g34350D;BnaA10g11080D;BnaA06g13760D;BnaC02g48590D;BnaA05g27660D;BnaC01g03320D;BnaA07g30430D;BnaC04g40810D;BnaA06g15030D;BnaA01g06180D;BnaC03g67810D;BnaC01g18020D;BnaC01g28850D;BnaC09g53650D;BnaA03g13640D;BnaC01g07450D;BnaA04g17200D;BnaC02g39950D;BnaA01g37370D;BnaC08g48860D;BnaA01g…
GO0009646	response to absence of light	8	490	141	47438	0.000116878	0.00152235	5.8422	BnaC09g37560D;BnaC04g07710D;BnaA03g26220D;BnaC03g73200D;BnaC03g34940D;BnaA10g15190D;BnaA03g29700D;BnaCnng72260D
GO0043617	cellular response to sucrose starvation	3	490	10	47438	0.000124535	0.00161397	41.3092	BnaC03g34940D;BnaA03g29700D;BnaCnng72260D
GO1901957	regulation of cutin biosynthetic process	4	490	26	47438	0.000140372	0.00180087	17.5556	BnaC04g45790D;BnaA04g22080D;BnaC04g06760D;BnaC04g45800D
GO0031090	organelle membrane	68	490	4137	47438	0.00014102	0.00180087	1.69806	BnaC08g21320D;BnaAnng34010D;BnaA08g06260D;BnaC02g45160D;BnaAnng04520D;BnaA01g20660D;BnaA04g17560D;BnaC03g52730D;BnaC06g13300D;BnaCnng56610D;BnaC03g59660D;BnaA01g04780D;BnaC09g34350D;BnaA07g18900D;BnaC01g14990D;BnaC08g13040D;BnaA05g10480D;BnaA08g16310D;BnaA04g21850D;BnaC06g38200D;BnaC09g40960D;BnaAnng13010D;BnaCnng33690D;BnaA02g31990D;BnaC08g08130D;BnaA06g09900D;BnaA09g52260D;BnaC01g10130D;BnaC04g…
GO0006520	cellular amino acid metabolic process	24	490	980	47438	0.00014104	0.00180087	2.47771	BnaC03g24530D;BnaA01g03680D;BnaA05g05760D;BnaCnng33690D;BnaC01g05030D;BnaC03g04830D;BnaC02g13860D;BnaC05g06260D;BnaC03g74750D;BnaC03g28300D;BnaA06g22040D;BnaA07g35920D;BnaA03g03400D;BnaA03g23800D;BnaC02g13840D;BnaA02g09890D;BnaA09g53100D;BnaC04g05620D;BnaA06g36140D;BnaC07g18960D;BnaA01g24820D;BnaCnng72260D;BnaA02g09960D;BnaA06g38800D
GO0023051	regulation of signaling	39	490	1985	47438	0.000147736	0.00187711	1.99976	BnaA09g40670D;BnaC05g41830D;BnaC05g38410D;BnaAnng23920D;BnaC09g34350D;BnaA05g10480D;BnaA06g13760D;BnaA05g27660D;BnaA07g30430D;BnaC08g49040D;BnaC01g18020D;BnaC07g48820D;BnaA01g37370D;BnaA01g15250D;BnaA06g13250D;BnaC05g13120D;BnaA05g02510D;BnaC03g52390D;BnaC05g14810D;BnaC03g39000D;BnaA08g17540D;BnaC06g33910D;BnaA03g47830D;BnaC08g37780D;BnaA10g15140D;BnaC04g02270D;BnaA08g23150D;BnaC08g36840D;BnaA10g…
GO0044446	obsolete intracellular organelle part	114	490	14708	47438	0.000152196	0.00192435	0.672157	BnaC08g21320D;BnaA03g00260D;BnaC03g00160D;BnaAnng34010D;BnaA08g06260D;BnaAnng04520D;BnaA01g20660D;BnaC05g31460D;BnaA04g17560D;BnaC04g07710D;BnaC03g52730D;BnaCnng27210D;BnaC06g13300D;BnaC03g59270D;BnaCnng56610D;BnaC07g15270D;BnaC05g38410D;BnaC03g59660D;BnaC04g07760D;BnaA01g04780D;BnaA03g02070D;BnaCnng37100D;BnaC09g34350D;BnaA03g24720D;BnaA07g18900D;BnaC01g14990D;BnaC08g13040D;BnaA05g10480D;BnaA08g…
GO0010646	regulation of cell communication	39	490	1995	47438	0.000157066	0.00197629	1.98909	BnaA09g40670D;BnaC05g41830D;BnaC05g38410D;BnaAnng23920D;BnaC09g34350D;BnaA05g10480D;BnaA06g13760D;BnaA05g27660D;BnaA07g30430D;BnaC08g49040D;BnaC01g18020D;BnaC07g48820D;BnaA01g37370D;BnaA01g15250D;BnaA06g13250D;BnaC05g13120D;BnaA05g02510D;BnaC03g52390D;BnaC05g14810D;BnaC03g39000D;BnaA08g17540D;BnaC06g33910D;BnaA03g47830D;BnaC08g37780D;BnaA10g15140D;BnaC04g02270D;BnaA08g23150D;BnaC08g36840D;BnaA10g…
GO0006979	response to oxidative stress	29	490	1323	47438	0.000158586	0.00198578	2.21943	BnaA09g13300D;BnaA03g00260D;BnaC03g00160D;BnaC09g37560D;BnaC07g15270D;BnaA03g02070D;BnaC08g13910D;BnaA05g05760D;BnaA03g26220D;BnaC03g73200D;BnaC07g43770D;BnaCnng33690D;BnaA08g18790D;BnaCnng63310D;BnaAnng01320D;BnaA03g60000D;BnaC03g58080D;BnaA05g33880D;BnaC02g15270D;BnaC09g16820D;BnaA10g15190D;BnaA06g18440D;BnaC02g42410D;BnaC04g05620D;BnaA01g24820D;BnaA02g10970D;BnaA03g02060D;BnaC01g41470D;BnaC05g…
GO0004535	poly(A)-specific ribonuclease activity	4	490	27	47438	0.000163444	0.00203676	16.7919	BnaA06g38950D;BnaC02g09390D;BnaA10g14100D;BnaA02g05510D
GO0010111	glyoxysome organization	3	490	11	47438	0.000169922	0.00210735	36.1448	BnaA05g10480D;BnaA03g15290D;BnaC04g11470D
GO0016411	acylglycerol O-acyltransferase activity	6	490	79	47438	0.000173153	0.00213721	7.96021	BnaC03g19520D;BnaC06g12160D;BnaA03g16250D;BnaA05g12980D;BnaC07g23920D;BnaA06g32640D
GO0009644	response to high light intensity	12	490	328	47438	0.000181334	0.00222757	3.70468	BnaAnng17910D;BnaA10g11080D;BnaA08g28620D;BnaC06g38200D;BnaC03g48070D;BnaA08g18790D;BnaC09g53650D;BnaC03g58080D;BnaC03g52390D;BnaA06g25550D;BnaA07g33590D;BnaC05g21480D
GO0015368	calciumcation antiporter activity	4	490	28	47438	0.000189134	0.00231243	16.0919	BnaA04g21850D;BnaA06g01060D;BnaA05g14600D;BnaC04g45720D
GO0010166	wax metabolic process	7	490	115	47438	0.000201737	0.00245495	6.28556	BnaC03g19520D;BnaC06g12160D;BnaA03g16250D;BnaA05g12980D;BnaCnng09200D;BnaA09g28510D;BnaC05g00780D
GO0016772	transferase activity, transferring phosphorus-containing groups	17	490	3582	47438	0.000205138	0.00248466	0.437369	BnaC08g28550D;BnaA05g29500D;BnaC08g13910D;BnaCnng37100D;BnaC01g03320D;BnaA06g15030D;BnaA01g06180D;BnaC03g67810D;BnaC01g28850D;BnaC01g07450D;BnaC08g48860D;BnaC02g44850D;BnaA06g18440D;BnaA08g12770D;BnaC05g43850D;BnaC01g06260D;BnaC04g43980D
GO0098588	bounding membrane of organelle	54	490	3104	47438	0.00020955	0.0025263	1.78259	BnaC08g21320D;BnaA08g06260D;BnaAnng04520D;BnaA01g20660D;BnaA04g17560D;BnaC06g13300D;BnaCnng56610D;BnaC03g59660D;BnaA01g04780D;BnaC09g34350D;BnaA07g18900D;BnaA05g10480D;BnaA08g16310D;BnaA04g21850D;BnaC06g38200D;BnaC09g40960D;BnaAnng13010D;BnaCnng33690D;BnaC08g08130D;BnaA09g52260D;BnaC01g10130D;BnaC04g51630D;BnaC07g28040D;BnaC04g41120D;BnaC01g26220D;BnaCnng29630D;BnaA08g30600D;BnaA06g01060D;BnaA09g…
GO1901361	organic cyclic compound catabolic process	20	490	779	47438	0.000215208	0.00258249	2.58958	BnaA06g38950D;BnaA09g27040D;BnaC02g09390D;BnaAnng20200D;BnaA06g11500D;BnaCnng37100D;BnaA10g14100D;BnaC02g13860D;BnaC03g74750D;BnaC02g44850D;BnaA06g22040D;BnaA02g05510D;BnaC02g13840D;BnaA02g09890D;BnaC01g34640D;BnaA01g27800D;BnaA04g07260D;BnaA02g09960D;BnaC08g37940D;BnaA06g38800D
GO0044427	obsolete chromosomal part	1	490	1091	47438	0.00021978	0.00262521	0.0860359	BnaCnng27210D
GO0043648	dicarboxylic acid metabolic process	10	490	240	47438	0.00022112	0.0026291	4.2317	BnaCnng33690D;BnaC03g04830D;BnaC03g74750D;BnaA06g22040D;BnaA03g03400D;BnaC08g48460D;BnaA06g16270D;BnaA06g36140D;BnaC07g18960D;BnaA01g24820D
GO0050898	nitrile metabolic process	3	490	12	47438	0.000224825	0.00263686	32.128	BnaC07g26280D;BnaC02g38400D;BnaA06g30390D
GO0052638	indole-3-butyrate beta-glucosyltransferase activity	3	490	12	47438	0.000224825	0.00263686	32.128	BnaC03g17730D;BnaA03g14700D;BnaC03g17740D
GO0080028	nitrile biosynthetic process	3	490	12	47438	0.000224825	0.00263686	32.128	BnaC07g26280D;BnaC02g38400D;BnaA06g30390D
GO0019901	protein kinase binding	11	490	288	47438	0.000231162	0.00269898	3.86923	BnaC05g41830D;BnaAnng23920D;BnaA05g27660D;BnaC01g18020D;BnaA01g37370D;BnaC08g48860D;BnaA01g15250D;BnaA03g47830D;BnaC07g40100D;BnaCnng44030D;BnaC04g43980D
GO0005634	nucleus	104	490	13542	47438	0.000236168	0.00274469	0.671871	BnaA10g18700D;BnaCnng37520D;BnaA07g24330D;BnaA09g09830D;BnaC05g31460D;BnaC01g01940D;BnaC04g07710D;BnaC05g41830D;BnaCnng27210D;BnaC03g59270D;BnaC05g38410D;BnaC03g21860D;BnaC04g07760D;BnaC07g36050D;BnaA05g29500D;BnaAnng23990D;BnaAnng23920D;BnaA06g34720D;BnaC09g34350D;BnaC03g47100D;BnaA02g26610D;BnaC08g17880D;BnaC03g17600D;BnaA05g10480D;BnaC08g31770D;BnaA06g24600D;BnaC04g50970D;BnaC02g48590D;BnaA05g…
GO0005694	chromosome	2	490	1306	47438	0.000237195	0.00274469	0.143455	BnaCnng27210D;BnaC04g07760D
GO0005509	calcium ion binding	13	490	390	47438	0.000245485	0.00282799	3.36666	BnaA08g06260D;BnaAnng04520D;BnaA03g40940D;BnaC08g17850D;BnaA08g22720D;BnaC07g25470D;BnaA06g38470D;BnaC09g16820D;BnaA06g01060D;BnaC08g06690D;BnaA05g14600D;BnaC05g27530D;BnaC05g13970D
GO0006570	tyrosine metabolic process	4	490	30	47438	0.000249049	0.00285635	14.8534	BnaC02g13860D;BnaC02g13840D;BnaA02g09890D;BnaA02g09960D
GO0043168	anion binding	37	490	1889	47438	0.000256992	0.00292748	1.98884	BnaA08g06260D;BnaC02g45160D;BnaAnng04520D;BnaA03g17400D;BnaA06g11500D;BnaC04g00160D;BnaC04g53560D;BnaC04g53550D;BnaA06g13760D;BnaAnng13010D;BnaAnng19740D;BnaC03g72040D;BnaC07g48820D;BnaC05g15780D;BnaC03g06000D;BnaC04g53580D;BnaA07g11450D;BnaAnng30320D;BnaC09g08130D;BnaA05g34880D;BnaA03g04460D;BnaC08g06690D;BnaAnng13720D;BnaA09g53100D;BnaC02g10080D;BnaC05g27530D;BnaA06g36140D;BnaC05g15180D;BnaC07g…
GO0090376	seed trichome differentiation	6	490	85	47438	0.000258639	0.00292748	7.35469	BnaCnng37520D;BnaC04g45790D;BnaA09g32110D;BnaA04g22080D;BnaC04g06760D;BnaC04g45800D
GO0090378	seed trichome elongation	6	490	85	47438	0.000258639	0.00292748	7.35469	BnaCnng37520D;BnaC04g45790D;BnaA09g32110D;BnaA04g22080D;BnaC04g06760D;BnaC04g45800D
GO0010205	photoinhibition	5	490	55	47438	0.000261956	0.00293935	9.66969	BnaA10g11080D;BnaA08g28620D;BnaC06g38200D;BnaC09g53650D;BnaA07g33590D
GO0043155	negative regulation of photosynthesis, light reaction	5	490	55	47438	0.000261956	0.00293935	9.66969	BnaA10g11080D;BnaA08g28620D;BnaC06g38200D;BnaC09g53650D;BnaA07g33590D
GO0010150	leaf senescence	14	490	446	47438	0.000264822	0.00294944	3.16694	BnaC09g34350D;BnaA03g26220D;BnaC03g73200D;BnaC03g04830D;BnaC02g15270D;BnaAnng26200D;BnaA03g03400D;BnaCnng37560D;BnaC04g53030D;BnaC06g34480D;BnaA10g12140D;BnaA05g03420D;BnaA02g10970D;BnaC03g45280D
GO0006355	regulation of transcription, DNA-templated	43	490	6772	47438	0.000265131	0.00294944	0.574965	BnaA05g12950D;BnaA06g02010D;BnaC05g31460D;BnaC01g01940D;BnaC04g07710D;BnaCnng27210D;BnaC03g52080D;BnaC05g38410D;BnaC04g07760D;BnaAnng23990D;BnaC08g31770D;BnaC04g50970D;BnaC06g05930D;BnaA05g01190D;BnaA08g18790D;BnaA06g21470D;BnaAnng01320D;BnaC06g05090D;BnaA01g26030D;BnaC03g58080D;BnaC03g52390D;BnaC03g39000D;BnaC06g38360D;BnaC08g26910D;BnaAnng26200D;BnaCnng09850D;BnaA05g05010D;BnaC04g01070D;BnaAnng…
GO0050897	cobalt ion binding	8	490	159	47438	0.000266328	0.00295009	5.1438	BnaC07g15270D;BnaCnng33690D;BnaC03g74750D;BnaC03g28300D;BnaA06g22040D;BnaA03g23800D;BnaAnng13720D;BnaA01g24820D
GO0004147	dihydrolipoamide branched chain acyltransferase activity	2	490	3	47438	0.000317244	0.00344057	192.406	BnaC03g34940D;BnaA03g29700D
GO0030523	dihydrolipoamide S-acyltransferase activity	2	490	3	47438	0.000317244	0.00344057	192.406	BnaC03g34940D;BnaA03g29700D
GO0033609	oxalate metabolic process	2	490	3	47438	0.000317244	0.00344057	192.406	BnaC08g48460D;BnaA06g16270D
GO0033611	oxalate catabolic process	2	490	3	47438	0.000317244	0.00344057	192.406	BnaC08g48460D;BnaA06g16270D
GO0050203	oxalate-CoA ligase activity	2	490	3	47438	0.000317244	0.00344057	192.406	BnaC08g48460D;BnaA06g16270D
GO0060255	regulation of macromolecule metabolic process	70	490	9812	47438	0.000320491	0.0034613	0.636522	BnaA06g38950D;BnaA05g12950D;BnaA06g02010D;BnaC02g09390D;BnaC05g31460D;BnaC01g01940D;BnaC04g07710D;BnaCnng27210D;BnaC03g52080D;BnaC05g38410D;BnaC04g07760D;BnaC07g36050D;BnaA05g29500D;BnaAnng23990D;BnaA02g26610D;BnaA10g11080D;BnaAnng20740D;BnaC08g31770D;BnaC04g50970D;BnaC02g48590D;BnaC06g05930D;BnaA05g01190D;BnaA10g14100D;BnaCnng62150D;BnaA08g18790D;BnaC09g53650D;BnaC01g25430D;BnaA06g21470D;BnaAnng…
GO0017111	nucleoside-triphosphatase activity	6	490	1960	47438	0.000341542	0.00367334	0.285454	BnaA09g09830D;BnaA08g28620D;BnaC03g16140D;BnaC09g27270D;BnaCnng44750D;BnaA06g21560D
GO0005198	structural molecule activity	2	490	1279	47438	0.000346555	0.00371186	0.146575	BnaC05g26170D;BnaA05g16130D
GO2000112	regulation of cellular macromolecule biosynthetic process	49	490	7413	47438	0.000349802	0.00373122	0.59726	BnaA06g38950D;BnaA05g12950D;BnaA06g02010D;BnaC02g09390D;BnaC05g31460D;BnaC01g01940D;BnaC04g07710D;BnaCnng27210D;BnaC03g52080D;BnaC05g38410D;BnaC04g07760D;BnaA05g29500D;BnaAnng23990D;BnaC08g31770D;BnaC04g50970D;BnaC06g05930D;BnaA05g01190D;BnaA10g14100D;BnaA08g18790D;BnaA06g21470D;BnaAnng01320D;BnaC06g05090D;BnaA01g26030D;BnaC03g58080D;BnaC03g52390D;BnaC03g39000D;BnaC06g38360D;BnaC08g26910D;BnaAnng…
GO0016462	pyrophosphatase activity	7	490	2101	47438	0.000357913	0.00376236	0.310438	BnaC03g58870D;BnaA09g09830D;BnaA08g28620D;BnaC03g16140D;BnaC09g27270D;BnaCnng44750D;BnaA06g21560D
GO1901565	organonitrogen compound catabolic process	43	490	2371	47438	0.000359731	0.00376236	1.84377	BnaCnng37520D;BnaA09g27040D;BnaAnng20200D;BnaA02g26610D;BnaA07g33240D;BnaA08g28620D;BnaC02g48590D;BnaCnng33690D;BnaAnng17870D;BnaC02g13860D;BnaC03g06000D;BnaC05g06260D;BnaC03g74750D;BnaC03g28300D;BnaC07g26280D;BnaA06g22040D;BnaA03g04460D;BnaA03g23800D;BnaC02g13840D;BnaA02g09890D;BnaA03g06670D;BnaA09g53100D;BnaC02g42410D;BnaC08g30370D;BnaC01g34640D;BnaA01g11390D;BnaC01g19760D;BnaC02g38400D;BnaA01g…
GO0080090	regulation of primary metabolic process	65	490	9238	47438	0.000362167	0.00376236	0.629822	BnaA06g38950D;BnaA05g12950D;BnaA06g02010D;BnaC02g09390D;BnaC05g31460D;BnaC01g01940D;BnaC04g07710D;BnaCnng27210D;BnaC03g52080D;BnaC05g38410D;BnaC04g07760D;BnaC07g36050D;BnaA05g29500D;BnaAnng23990D;BnaA02g26610D;BnaA10g11080D;BnaAnng20740D;BnaC08g31770D;BnaC04g50970D;BnaC02g48590D;BnaC06g05930D;BnaA05g01190D;BnaA10g14100D;BnaCnng62150D;BnaA08g18790D;BnaC09g53650D;BnaC01g25430D;BnaA06g21470D;BnaAnng…
GO0032410	negative regulation of transporter activity	4	490	33	47438	0.000362882	0.00376236	13.316	BnaC05g41830D;BnaAnng23920D;BnaA05g27660D;BnaA01g37370D
GO0032413	negative regulation of ion transmembrane transporter activity	4	490	33	47438	0.000362882	0.00376236	13.316	BnaC05g41830D;BnaAnng23920D;BnaA05g27660D;BnaA01g37370D
GO0034763	negative regulation of transmembrane transport	4	490	33	47438	0.000362882	0.00376236	13.316	BnaC05g41830D;BnaAnng23920D;BnaA05g27660D;BnaA01g37370D
GO0034766	negative regulation of ion transmembrane transport	4	490	33	47438	0.000362882	0.00376236	13.316	BnaC05g41830D;BnaAnng23920D;BnaA05g27660D;BnaA01g37370D
GO0016627	oxidoreductase activity, acting on the CH-CH group of donors	8	490	169	47438	0.000401115	0.00414219	4.82328	BnaC08g11410D;BnaA01g13700D;BnaC01g16080D;BnaA09g32380D;BnaC04g28570D;BnaC01g34640D;BnaA01g27800D;BnaA06g38800D
GO0019219	regulation of nucleobase-containing compound metabolic process	51	490	7610	47438	0.000405051	0.00416624	0.605364	BnaA05g12950D;BnaA06g02010D;BnaC05g31460D;BnaC01g01940D;BnaC04g07710D;BnaCnng27210D;BnaC03g52080D;BnaC05g38410D;BnaC04g07760D;BnaAnng23990D;BnaC08g31770D;BnaC04g50970D;BnaC06g05930D;BnaA05g01190D;BnaA08g18790D;BnaA06g21470D;BnaAnng01320D;BnaA06g13250D;BnaC06g05090D;BnaA01g26030D;BnaC03g58080D;BnaC03g52390D;BnaC05g14810D;BnaC03g39000D;BnaC06g38360D;BnaC08g26910D;BnaA08g17540D;BnaAnng26200D;BnaCnng…
GO0030246	carbohydrate binding	11	490	308	47438	0.000408116	0.00418117	3.60713	BnaC03g21860D;BnaC03g47100D;BnaC04g25500D;BnaCnng07500D;BnaC02g13250D;BnaC08g26260D;BnaCnng63310D;BnaA04g03610D;BnaA07g17230D;BnaA03g22360D;BnaA02g09200D
GO0016854	racemase and epimerase activity	6	490	93	47438	0.000420618	0.00427418	6.67726	BnaAnng10090D;BnaC01g15760D;BnaA03g50170D;BnaC07g18010D;BnaA01g13540D;BnaC07g42640D
GO0001871	obsolete pattern binding	9	490	214	47438	0.000422141	0.00427418	4.26639	BnaC03g47100D;BnaC04g25500D;BnaCnng07500D;BnaC02g13250D;BnaC08g26260D;BnaA04g03610D;BnaA07g17230D;BnaA03g22360D;BnaA02g09200D
GO0030247	polysaccharide binding	9	490	214	47438	0.000422141	0.00427418	4.26639	BnaC03g47100D;BnaC04g25500D;BnaCnng07500D;BnaC02g13250D;BnaC08g26260D;BnaA04g03610D;BnaA07g17230D;BnaA03g22360D;BnaA02g09200D
GO0042623	ATPase activity	3	490	1416	47438	0.000436046	0.00439778	0.198516	BnaA09g09830D;BnaA08g28620D;BnaCnng44750D
GO0090693	plant organ senescence	14	490	471	47438	0.000455818	0.00457938	2.99208	BnaC09g34350D;BnaA03g26220D;BnaC03g73200D;BnaC03g04830D;BnaC02g15270D;BnaAnng26200D;BnaA03g03400D;BnaCnng37560D;BnaC04g53030D;BnaC06g34480D;BnaA10g12140D;BnaA05g03420D;BnaA02g10970D;BnaC03g45280D
GO0016020	membrane	195	490	15321	47438	0.000461324	0.0046168	1.39064	BnaA09g13300D;BnaC08g21320D;BnaA03g00260D;BnaA09g09830D;BnaC03g00160D;BnaAnng34010D;BnaA08g06260D;BnaC07g11810D;BnaC02g45160D;BnaA07g08700D;BnaAnng04520D;BnaCnng37450D;BnaA01g20660D;BnaC03g19520D;BnaAnng23050D;BnaC09g37560D;BnaA04g17560D;BnaC03g52730D;BnaC04g00160D;BnaC06g13300D;BnaCnng56610D;BnaA09g42610D;BnaC03g59660D;BnaC02g33350D;BnaA01g04780D;BnaC08g13910D;BnaC09g34350D;BnaA03g24720D;BnaC03g…
GO0005840	ribosome	2	490	1216	47438	0.000474121	0.00472662	0.154394	BnaC07g15270D;BnaC05g00780D
GO0097159	organic cyclic compound binding	61	490	8680	47438	0.000516305	0.00512745	0.632329	BnaA05g12950D;BnaA09g27040D;BnaA01g36810D;BnaA08g06260D;BnaAnng04520D;BnaA03g17400D;BnaC01g01940D;BnaC04g00160D;BnaCnng27210D;BnaC07g15270D;BnaC05g38410D;BnaC04g53560D;BnaC04g07760D;BnaC04g53550D;BnaAnng23990D;BnaCnng27950D;BnaC08g31770D;BnaC07g50310D;BnaC04g50970D;BnaAnng13010D;BnaAnng19740D;BnaC03g72040D;BnaA05g01190D;BnaA09g29060D;BnaA08g18790D;BnaC03g06000D;BnaC04g53580D;BnaAnng01320D;BnaA01g…
GO0044267	cellular protein metabolic process	58	490	8348	47438	0.000525347	0.00519732	0.626079	BnaCnng37520D;BnaA03g13650D;BnaC05g31460D;BnaC05g41830D;BnaC07g36050D;BnaA05g29500D;BnaC08g13910D;BnaAnng23920D;BnaC09g34350D;BnaA02g26610D;BnaA10g11080D;BnaA07g33240D;BnaA06g13760D;BnaA08g28620D;BnaC02g48590D;BnaA05g27660D;BnaC01g03320D;BnaA07g30430D;BnaC04g40810D;BnaA06g15030D;BnaA01g06180D;BnaC03g67810D;BnaC01g18020D;BnaA09g29060D;BnaAnng17870D;BnaC01g28850D;BnaC09g53650D;BnaA03g13640D;BnaC01g…
GO0010109	regulation of photosynthesis	7	490	135	47438	0.000534496	0.00526773	5.30118	BnaC08g21320D;BnaA10g11080D;BnaA08g28620D;BnaC06g38200D;BnaC09g53650D;BnaC01g26220D;BnaA07g33590D
GO2000022	regulation of jasmonic acid mediated signaling pathway	8	490	177	47438	0.000544955	0.00535047	4.59417	BnaA06g13250D;BnaC05g14810D;BnaA08g17540D;BnaC08g37780D;BnaA08g23150D;BnaC08g36840D;BnaA09g44300D;BnaA02g15990D
GO0019432	triglyceride biosynthetic process	6	490	98	47438	0.000556281	0.00544106	6.31369	BnaC03g19520D;BnaC06g12160D;BnaA03g16250D;BnaA05g12980D;BnaC07g23920D;BnaA06g32640D
GO0047196	long-chain-alcohol O-fatty-acyltransferase activity	4	490	37	47438	0.000566916	0.00552424	11.701	BnaC03g19520D;BnaC06g12160D;BnaA03g16250D;BnaA05g12980D
GO1905156	negative regulation of photosynthesis	5	490	65	47438	0.000571612	0.00554913	8.05636	BnaA10g11080D;BnaA08g28620D;BnaC06g38200D;BnaC09g53650D;BnaA07g33590D
GO0044422	obsolete organelle part	118	490	14769	47438	0.000587807	0.00567127	0.699252	BnaC08g21320D;BnaA03g00260D;BnaC03g00160D;BnaAnng34010D;BnaA08g06260D;BnaC02g45160D;BnaAnng04520D;BnaA01g20660D;BnaC05g31460D;BnaA04g17560D;BnaC04g07710D;BnaC03g52730D;BnaCnng27210D;BnaC06g13300D;BnaC03g59270D;BnaCnng56610D;BnaC07g15270D;BnaC05g38410D;BnaC03g59660D;BnaC04g07760D;BnaA01g04780D;BnaA03g02070D;BnaCnng37100D;BnaC09g34350D;BnaA03g24720D;BnaA07g18900D;BnaC01g14990D;BnaC08g13040D;BnaA05g…
GO0003824	catalytic activity	239	490	19493	47438	0.000623421	0.00567127	1.36958	BnaC04g52580D;BnaC03g58870D;BnaA06g38950D;BnaA10g18700D;BnaCnng37520D;BnaA09g27040D;BnaA09g13300D;BnaC09g20370D;BnaA09g09830D;BnaA08g06260D;BnaC08g28550D;BnaA03g13650D;BnaC02g09390D;BnaAnng04520D;BnaA03g17400D;BnaC03g19520D;BnaAnng20200D;BnaAnng23050D;BnaC05g31460D;BnaCnng55020D;BnaA04g17560D;BnaC05g41830D;BnaA06g11500D;BnaC06g10380D;BnaC07g15270D;BnaC05g42570D;BnaC04g53560D;BnaC07g36050D;BnaC04g…
GO1901363	heterocyclic compound binding	61	490	8639	47438	0.000626086	0.00567127	0.636031	BnaA05g12950D;BnaA09g27040D;BnaA01g36810D;BnaA08g06260D;BnaAnng04520D;BnaA03g17400D;BnaC01g01940D;BnaC04g00160D;BnaCnng27210D;BnaC07g15270D;BnaC05g38410D;BnaC04g53560D;BnaC04g07760D;BnaC04g53550D;BnaAnng23990D;BnaCnng27950D;BnaC08g31770D;BnaC07g50310D;BnaC04g50970D;BnaAnng13010D;BnaAnng19740D;BnaC03g72040D;BnaA05g01190D;BnaA09g29060D;BnaA08g18790D;BnaC03g06000D;BnaC04g53580D;BnaAnng01320D;BnaA01g…
GO0000905	sporocarp development involved in asexual reproduction	2	490	4	47438	0.000630141	0.00567127	96.2008	BnaC08g24280D;BnaA09g33460D
GO0001896	autolysis	2	490	4	47438	0.000630141	0.00567127	96.2008	BnaC08g24280D;BnaA09g33460D
GO0004411	homogentisate 1,2-dioxygenase activity	2	490	4	47438	0.000630141	0.00567127	96.2008	BnaC02g13840D;BnaA02g09890D
GO0004587	ornithine-oxo-acid transaminase activity	2	490	4	47438	0.000630141	0.00567127	96.2008	BnaA06g36140D;BnaC07g18960D
GO0006593	ornithine catabolic process	2	490	4	47438	0.000630141	0.00567127	96.2008	BnaA06g36140D;BnaC07g18960D
GO0010913	regulation of sterigmatocystin biosynthetic process	2	490	4	47438	0.000630141	0.00567127	96.2008	BnaC08g24280D;BnaA09g33460D
GO0010914	positive regulation of sterigmatocystin biosynthetic process	2	490	4	47438	0.000630141	0.00567127	96.2008	BnaC08g24280D;BnaA09g33460D
GO0019544	arginine catabolic process to glutamate	2	490	4	47438	0.000630141	0.00567127	96.2008	BnaA06g36140D;BnaC07g18960D
GO0034305	regulation of asexual sporulation	2	490	4	47438	0.000630141	0.00567127	96.2008	BnaC08g24280D;BnaA09g33460D
GO0043385	mycotoxin metabolic process	2	490	4	47438	0.000630141	0.00567127	96.2008	BnaC08g24280D;BnaA09g33460D
GO0043386	mycotoxin biosynthetic process	2	490	4	47438	0.000630141	0.00567127	96.2008	BnaC08g24280D;BnaA09g33460D
GO0045460	sterigmatocystin metabolic process	2	490	4	47438	0.000630141	0.00567127	96.2008	BnaC08g24280D;BnaA09g33460D
GO0045461	sterigmatocystin biosynthetic process	2	490	4	47438	0.000630141	0.00567127	96.2008	BnaC08g24280D;BnaA09g33460D
GO0075306	regulation of conidium formation	2	490	4	47438	0.000630141	0.00567127	96.2008	BnaC08g24280D;BnaA09g33460D
GO0075307	positive regulation of conidium formation	2	490	4	47438	0.000630141	0.00567127	96.2008	BnaC08g24280D;BnaA09g33460D
GO1901376	organic heteropentacyclic compound metabolic process	2	490	4	47438	0.000630141	0.00567127	96.2008	BnaC08g24280D;BnaA09g33460D
GO1901378	organic heteropentacyclic compound biosynthetic process	2	490	4	47438	0.000630141	0.00567127	96.2008	BnaC08g24280D;BnaA09g33460D
GO1903666	positive regulation of asexual reproduction	2	490	4	47438	0.000630141	0.00567127	96.2008	BnaC08g24280D;BnaA09g33460D
GO0043604	amide biosynthetic process	3	490	1397	47438	0.000632445	0.00567231	0.201306	BnaA09g29060D;BnaCnng72260D;BnaC01g41470D
GO0016616	oxidoreductase activity, acting on the CH-OH group of donors, NAD or NADP as acceptor	11	490	326	47438	0.000653364	0.00583347	3.3997	BnaA10g18700D;BnaA03g17400D;BnaC04g53560D;BnaC04g53550D;BnaC03g72040D;BnaC04g53580D;BnaA04g00820D;BnaAnng30320D;BnaA05g34880D;BnaC09g42430D;BnaC03g61120D
GO0016628	oxidoreductase activity, acting on the CH-CH group of donors, NAD or NADP as acceptor	5	490	67	47438	0.000657165	0.00583347	7.79614	BnaC08g11410D;BnaA01g13700D;BnaC01g16080D;BnaC01g34640D;BnaA01g27800D
GO0016702	oxidoreductase activity, acting on single donors with incorporation of molecular oxygen, incorporation of two atoms of oxygen	5	490	67	47438	0.000657165	0.00583347	7.79614	BnaA06g00850D;BnaA05g33880D;BnaC02g13840D;BnaA02g09890D;BnaC06g06420D
GO0008270	zinc ion binding	15	490	547	47438	0.000664459	0.00586619	2.7552	BnaA08g06260D;BnaAnng04520D;BnaAnng20200D;BnaC02g48590D;BnaCnng33690D;BnaC03g34940D;BnaC03g74750D;BnaA06g22040D;BnaC08g06690D;BnaAnng13720D;BnaC05g27530D;BnaA06g36140D;BnaC07g18960D;BnaA01g24820D;BnaA03g29700D
GO0070588	calcium ion transmembrane transport	9	490	228	47438	0.000665377	0.00586619	3.99245	BnaA08g06260D;BnaAnng04520D;BnaA04g21850D;BnaA10g18740D;BnaA06g01060D;BnaC08g06690D;BnaA05g14600D;BnaC05g27530D;BnaC04g45720D
GO0003729	mRNA binding	2	490	1190	47438	0.000680198	0.00597652	0.157863	BnaC07g50310D;BnaC07g34380D
GO0043043	peptide biosynthetic process	2	490	1195	47438	0.000686344	0.00597957	0.157184	BnaA09g29060D;BnaC01g41470D
GO0016645	oxidoreductase activity, acting on the CH-NH group of donors	6	490	102	47438	0.000687455	0.00597957	6.0501	BnaA01g03680D;BnaC01g05030D;BnaC03g06000D;BnaC03g74750D;BnaA06g22040D;BnaA03g04460D
GO0016301	kinase activity	15	490	3163	47438	0.000687967	0.00597957	0.439377	BnaC08g28550D;BnaA05g29500D;BnaC08g13910D;BnaC01g03320D;BnaA06g15030D;BnaA01g06180D;BnaC03g67810D;BnaC01g28850D;BnaC01g07450D;BnaC08g48860D;BnaA06g18440D;BnaA08g12770D;BnaC05g43850D;BnaC01g06260D;BnaC04g43980D
GO0016614	oxidoreductase activity, acting on CH-OH group of donors	12	490	381	47438	0.000692006	0.00597957	3.16896	BnaA10g18700D;BnaA03g17400D;BnaC04g53560D;BnaC04g53550D;BnaAnng19740D;BnaC03g72040D;BnaC04g53580D;BnaA04g00820D;BnaAnng30320D;BnaA05g34880D;BnaC09g42430D;BnaC03g61120D
GO0044238	primary metabolic process	158	490	18808	47438	0.000694267	0.00597957	0.722098	BnaC04g52580D;BnaC03g58870D;BnaA06g38950D;BnaA10g18700D;BnaCnng37520D;BnaA09g27040D;BnaC08g21320D;BnaC09g20370D;BnaAnng34010D;BnaC08g28550D;BnaA03g13650D;BnaC02g09390D;BnaC03g19520D;BnaAnng20200D;BnaC05g31460D;BnaCnng55020D;BnaC05g41830D;BnaC07g36050D;BnaA05g29500D;BnaAnng10090D;BnaC08g11410D;BnaC08g13910D;BnaCnng37100D;BnaAnng23920D;BnaC09g34350D;BnaA02g26610D;BnaA10g11080D;BnaC07g35800D;BnaC03g…
GO0044445	obsolete cytosolic part	2	490	1200	47438	0.000694387	0.00597957	0.156511	BnaC07g15270D;BnaC05g00780D
GO0042493	response to drug	42	490	2349	47438	0.000709446	0.00608902	1.81408	BnaCnng37520D;BnaA05g12950D;BnaA09g13300D;BnaA03g00260D;BnaC03g00160D;BnaC03g52080D;BnaC07g15270D;BnaC05g38410D;BnaC04g07760D;BnaAnng23990D;BnaC08g13040D;BnaA06g31640D;BnaA03g26220D;BnaC03g73200D;BnaC08g24010D;BnaA06g15030D;BnaA08g18790D;BnaA06g21470D;BnaC07g28040D;BnaAnng01320D;BnaC04g22390D;BnaA03g60000D;BnaA01g26030D;BnaC03g58080D;BnaC03g52390D;BnaA05g33880D;BnaC03g39000D;BnaA07g15770D;BnaC09g…
GO1902494	catalytic complex	13	490	2837	47438	0.000761305	0.00651255	0.425829	BnaAnng34010D;BnaA02g26610D;BnaC02g48590D;BnaA02g31990D;BnaC02g40580D;BnaC03g34940D;BnaA10g11760D;BnaC02g42410D;BnaCnng63660D;BnaA05g21090D;BnaA06g27640D;BnaC05g33960D;BnaA03g29700D
GO0071396	cellular response to lipid	23	490	1030	47438	0.000779105	0.0066429	2.24689	BnaA09g13300D;BnaA07g24330D;BnaA03g13650D;BnaC05g41830D;BnaAnng23920D;BnaA05g27660D;BnaC01g03320D;BnaA07g30430D;BnaC04g40810D;BnaA03g13640D;BnaA04g17200D;BnaA01g37370D;BnaA05g02510D;BnaC06g33910D;BnaC04g02270D;BnaA05g12330D;BnaC06g25430D;BnaC03g16540D;BnaA06g18440D;BnaC04g14780D;BnaC01g06260D;BnaC03g12400D;BnaC04g09800D
GO0031210	phosphatidylcholine binding	3	490	18	47438	0.000796318	0.00674528	19.2743	BnaC05g15780D;BnaA07g11450D;BnaC07g15380D
GO0050997	quaternary ammonium group binding	3	490	18	47438	0.000796318	0.00674528	19.2743	BnaC05g15780D;BnaA07g11450D;BnaC07g15380D
GO0090559	regulation of membrane permeability	4	490	41	47438	0.000841452	0.00710437	10.4351	BnaC08g13040D;BnaC05g15780D;BnaA07g11450D;BnaC07g15380D
GO0098805	membrane	47	490	2745	47438	0.000848591	0.00714139	1.74006	BnaC08g21320D;BnaA08g06260D;BnaAnng04520D;BnaA01g20660D;BnaA04g17560D;BnaC06g13300D;BnaCnng56610D;BnaC03g59660D;BnaA01g04780D;BnaA07g18900D;BnaA05g10480D;BnaA08g16310D;BnaA04g21850D;BnaC06g38200D;BnaAnng13010D;BnaCnng33690D;BnaA09g52260D;BnaC04g51630D;BnaC07g28040D;BnaC04g41120D;BnaC01g26220D;BnaA08g30600D;BnaA06g01060D;BnaA09g34030D;BnaC08g06690D;BnaA05g07690D;BnaAnng13720D;BnaA05g14600D;BnaC04g…
GO0043271	negative regulation of ion transport	4	490	42	47438	0.000922498	0.00773824	10.1603	BnaC05g41830D;BnaAnng23920D;BnaA05g27660D;BnaA01g37370D
GO0010029	regulation of seed germination	11	490	341	47438	0.000941848	0.00787506	3.24412	BnaA09g13300D;BnaC04g07710D;BnaC03g24530D;BnaAnng20740D;BnaCnng62150D;BnaC05g15780D;BnaA07g11450D;BnaC08g48460D;BnaA06g16270D;BnaC07g15380D;BnaC04g09800D
GO0070300	phosphatidic acid binding	4	490	43	47438	0.00100888	0.00840844	9.89955	BnaC02g45160D;BnaC09g08130D;BnaA09g07980D;BnaCnng27850D
GO0099516	antiporter activity	6	490	110	47438	0.00102057	0.00844865	5.58376	BnaC08g13040D;BnaA04g21850D;BnaA06g01060D;BnaA05g14600D;BnaC02g39630D;BnaC04g45720D
GO0015630	microtubule cytoskeleton	1	490	974	47438	0.00102225	0.00844865	0.0966273	BnaA06g21560D
GO0003842	1-pyrroline-5-carboxylate dehydrogenase activity	2	490	5	47438	0.00104304	0.00844865	64.1325	BnaC03g74750D;BnaA06g22040D
GO0003867	4-aminobutyrate transaminase activity	2	490	5	47438	0.00104304	0.00844865	64.1325	BnaCnng33690D;BnaA01g24820D
GO0019482	beta-alanine metabolic process	2	490	5	47438	0.00104304	0.00844865	64.1325	BnaCnng33690D;BnaA01g24820D
GO0019484	beta-alanine catabolic process	2	490	5	47438	0.00104304	0.00844865	64.1325	BnaCnng33690D;BnaA01g24820D
GO0033355	ascorbate glutathione cycle	2	490	5	47438	0.00104304	0.00844865	64.1325	BnaA06g13760D;BnaC05g15180D
GO0050313	sulfur dioxygenase activity	2	490	5	47438	0.00104304	0.00844865	64.1325	BnaA06g00850D;BnaC06g06420D
GO0050378	UDP-glucuronate 4-epimerase activity	2	490	5	47438	0.00104304	0.00844865	64.1325	BnaA03g50170D;BnaC07g42640D
GO1901701	cellular response to oxygen-containing compound	39	490	2190	47438	0.00105353	0.00850701	1.80093	BnaA09g13300D;BnaA07g24330D;BnaA03g13650D;BnaCnng37450D;BnaC05g41830D;BnaC05g38410D;BnaAnng23920D;BnaA03g26220D;BnaA05g27660D;BnaC03g73200D;BnaC01g03320D;BnaA07g30430D;BnaC04g40810D;BnaA03g13640D;BnaCnng63310D;BnaA04g17200D;BnaA01g37370D;BnaA06g13250D;BnaA05g02510D;BnaC05g14810D;BnaA05g33880D;BnaC03g39000D;BnaC06g33910D;BnaA07g03740D;BnaC04g02270D;BnaA05g12330D;BnaC06g25430D;BnaC03g16540D;BnaA06g…
GO1901698	response to nitrogen compound	30	490	1530	47438	0.0010917	0.00864625	1.976	BnaCnng37520D;BnaA09g13300D;BnaC02g45160D;BnaC06g13300D;BnaC03g52080D;BnaC05g38410D;BnaAnng23990D;BnaA06g31640D;BnaC08g24010D;BnaA08g18790D;BnaA06g21470D;BnaA01g26030D;BnaC03g58080D;BnaC03g52390D;BnaA05g33880D;BnaC09g08130D;BnaC03g39000D;BnaA07g15770D;BnaC08g26910D;BnaA06g18440D;BnaC04g53030D;BnaA05g28580D;BnaC02g26030D;BnaA05g03420D;BnaC06g19560D;BnaA07g15180D;BnaC05g21480D;BnaC04g43980D;BnaA09g…
GO0070405	ammonium ion binding	3	490	20	47438	0.00109557	0.00864625	17.006	BnaC05g15780D;BnaA07g11450D;BnaC07g15380D
GO0009084	glutamine family amino acid biosynthetic process	5	490	75	47438	0.00109792	0.00864625	6.90398	BnaA05g05760D;BnaA07g35920D;BnaC04g05620D;BnaA06g36140D;BnaC07g18960D
GO0015491	cationcation antiporter activity	5	490	75	47438	0.00109792	0.00864625	6.90398	BnaA04g21850D;BnaA06g01060D;BnaA05g14600D;BnaC02g39630D;BnaC04g45720D
GO0009074	aromatic amino acid family catabolic process	4	490	44	47438	0.0011008	0.00864625	9.65185	BnaC02g13860D;BnaC02g13840D;BnaA02g09890D;BnaA02g09960D
GO0030014	CCR4-NOT complex	4	490	44	47438	0.0011008	0.00864625	9.65185	BnaA06g38950D;BnaC02g09390D;BnaA10g14100D;BnaA02g05510D
GO0030015	CCR4-NOT core complex	4	490	44	47438	0.0011008	0.00864625	9.65185	BnaA06g38950D;BnaC02g09390D;BnaA10g14100D;BnaA02g05510D
GO0043295	glutathione binding	4	490	44	47438	0.0011008	0.00864625	9.65185	BnaA06g11500D;BnaA06g13760D;BnaC05g15180D;BnaC08g37940D
GO1900750	oligopeptide binding	4	490	44	47438	0.0011008	0.00864625	9.65185	BnaA06g11500D;BnaA06g13760D;BnaC05g15180D;BnaC08g37940D
GO0046460	neutral lipid biosynthetic process	6	490	112	47438	0.00112049	0.00874789	5.47817	BnaC03g19520D;BnaC06g12160D;BnaA03g16250D;BnaA05g12980D;BnaC07g23920D;BnaA06g32640D
GO0046463	acylglycerol biosynthetic process	6	490	112	47438	0.00112049	0.00874789	5.47817	BnaC03g19520D;BnaC06g12160D;BnaA03g16250D;BnaA05g12980D;BnaC07g23920D;BnaA06g32640D
GO0003712	transcription coregulator activity	11	490	351	47438	0.00118729	0.00924165	3.14803	BnaA06g13250D;BnaC05g14810D;BnaA08g17540D;BnaC08g37780D;BnaA08g23150D;BnaC08g36840D;BnaCnng63660D;BnaA05g21090D;BnaA09g44300D;BnaC05g33960D;BnaA02g15990D
GO0006525	arginine metabolic process	4	490	45	47438	0.00119842	0.00930033	9.41624	BnaC03g28300D;BnaA03g23800D;BnaA06g36140D;BnaC07g18960D
GO0009403	toxin biosynthetic process	5	490	77	47438	0.00123589	0.00950573	6.71191	BnaC04g50320D;BnaC08g24280D;BnaA06g18440D;BnaA09g33460D;BnaC01g41470D
GO0015298	solutecation antiporter activity	5	490	77	47438	0.00123589	0.00950573	6.71191	BnaA04g21850D;BnaA06g01060D;BnaA05g14600D;BnaC02g39630D;BnaC04g45720D
GO0016701	oxidoreductase activity, acting on single donors with incorporation of molecular oxygen	5	490	77	47438	0.00123589	0.00950573	6.71191	BnaA06g00850D;BnaA05g33880D;BnaC02g13840D;BnaA02g09890D;BnaC06g06420D
GO0001129	obsolete RNA polymerase II transcription factor activity, TBP-class protein binding, involved in preinitiation complex assembly	3	490	21	47438	0.00126841	0.00960042	16.0609	BnaCnng63660D;BnaA05g21090D;BnaC05g33960D
GO0001132	obsolete RNA polymerase II transcription factor activity, TBP-class protein binding	3	490	21	47438	0.00126841	0.00960042	16.0609	BnaCnng63660D;BnaA05g21090D;BnaC05g33960D
GO0017062	respiratory chain complex III assembly	3	490	21	47438	0.00126841	0.00960042	16.0609	BnaAnng34010D;BnaA02g31990D;BnaC02g40580D
GO0034551	mitochondrial respiratory chain complex III assembly	3	490	21	47438	0.00126841	0.00960042	16.0609	BnaAnng34010D;BnaA02g31990D;BnaC02g40580D
GO0006816	calcium ion transport	9	490	250	47438	0.00126923	0.00960042	3.62629	BnaA08g06260D;BnaAnng04520D;BnaA04g21850D;BnaA10g18740D;BnaA06g01060D;BnaC08g06690D;BnaA05g14600D;BnaC05g27530D;BnaC04g45720D
GO0019900	kinase binding	11	490	354	47438	0.00127043	0.00960042	3.12029	BnaC05g41830D;BnaAnng23920D;BnaA05g27660D;BnaC01g18020D;BnaA01g37370D;BnaC08g48860D;BnaA01g15250D;BnaA03g47830D;BnaC07g40100D;BnaCnng44030D;BnaC04g43980D
GO0010359	regulation of anion channel activity	4	490	46	47438	0.00130195	0.00981003	9.19185	BnaC05g41830D;BnaAnng23920D;BnaA05g27660D;BnaA01g37370D
GO0042548	regulation of photosynthesis, light reaction	5	490	78	47438	0.00130949	0.00983823	6.61983	BnaA10g11080D;BnaA08g28620D;BnaC06g38200D;BnaC09g53650D;BnaA07g33590D
GO0007049	cell cycle	4	490	1468	47438	0.00140611	0.0105336	0.255706	BnaC05g31460D;BnaA06g21560D;BnaC03g12400D;BnaA05g20100D
GO0000289	nuclear-transcribed mRNA poly(A) tail shortening	4	490	47	47438	0.00141156	0.010544	8.97789	BnaA06g38950D;BnaC02g09390D;BnaA10g14100D;BnaA02g05510D
GO0006122	mitochondrial electron transport, ubiquinol to cytochrome c	3	490	22	47438	0.00145748	0.0108557	15.2153	BnaAnng34010D;BnaA02g31990D;BnaC02g40580D
GO0051171	regulation of nitrogen compound metabolic process	67	490	9092	47438	0.00148168	0.0109836	0.665564	BnaA06g38950D;BnaA05g12950D;BnaA06g02010D;BnaC02g09390D;BnaC05g31460D;BnaC01g01940D;BnaC04g07710D;BnaCnng27210D;BnaC03g52080D;BnaC05g38410D;BnaC04g07760D;BnaC07g36050D;BnaA05g29500D;BnaAnng23990D;BnaA02g26610D;BnaA10g11080D;BnaAnng20740D;BnaC08g31770D;BnaC04g50970D;BnaA03g24900D;BnaC02g48590D;BnaC03g72930D;BnaC06g05930D;BnaA05g01190D;BnaA10g14100D;BnaCnng62150D;BnaA08g18790D;BnaC09g53650D;BnaC01g…
GO1900140	regulation of seedling development	11	490	361	47438	0.00148312	0.0109836	3.05743	BnaA09g13300D;BnaC04g07710D;BnaC03g24530D;BnaAnng20740D;BnaCnng62150D;BnaC05g15780D;BnaA07g11450D;BnaC08g48460D;BnaA06g16270D;BnaC07g15380D;BnaC04g09800D
GO0004601	peroxidase activity	8	490	207	47438	0.00149553	0.0110439	3.89908	BnaA08g06260D;BnaAnng04520D;BnaC07g15270D;BnaC07g43770D;BnaA05g33880D;BnaC08g06690D;BnaC06g32660D;BnaC05g27530D
GO0016646	oxidoreductase activity, acting on the CH-NH group of donors, NAD or NADP as acceptor	4	490	48	47438	0.00152745	0.0112476	8.77366	BnaA01g03680D;BnaC01g05030D;BnaC03g74750D;BnaA06g22040D
GO0046686	response to cadmium ion	24	490	1151	47438	0.0015478	0.0112503	2.09395	BnaA08g06260D;BnaAnng04520D;BnaC07g15270D;BnaC04g53560D;BnaC04g07760D;BnaC04g53550D;BnaCnng37100D;BnaA06g24600D;BnaC06g38200D;BnaCnng33690D;BnaA09g29060D;BnaC04g53580D;BnaC02g44850D;BnaAnng30320D;BnaA05g34880D;BnaC08g06690D;BnaAnng13720D;BnaC04g28590D;BnaC08g48460D;BnaA06g16270D;BnaC05g27530D;BnaA07g33590D;BnaA01g24820D;BnaC01g41470D
GO0004753	saccharopine dehydrogenase activity	2	490	6	47438	0.00155386	0.0112503	48.0984	BnaA01g03680D;BnaC01g05030D
GO0017084	delta1-pyrroline-5-carboxylate synthetase activity	2	490	6	47438	0.00155386	0.0112503	48.0984	BnaA05g05760D;BnaC04g05620D
GO0019878	lysine biosynthetic process via aminoadipic acid	2	490	6	47438	0.00155386	0.0112503	48.0984	BnaA01g03680D;BnaC01g05030D
GO0046975	histone methyltransferase activity (H3-K36 specific)	2	490	6	47438	0.00155386	0.0112503	48.0984	BnaC05g31460D;BnaA05g20100D
GO0072512	trivalent inorganic cation transport	2	490	6	47438	0.00155386	0.0112503	48.0984	BnaC09g37560D;BnaA10g15190D
GO0090305	nucleic acid phosphodiester bond hydrolysis	6	490	1753	47438	0.00156983	0.0113343	0.320746	BnaA06g38950D;BnaC02g09390D;BnaA10g14100D;BnaA02g05510D;BnaA06g33900D;BnaA04g07260D
GO0071840	cellular component organization or biogenesis	69	490	9296	47438	0.00161911	0.0116576	0.670023	BnaA10g18700D;BnaCnng37520D;BnaC08g21320D;BnaAnng34010D;BnaAnng23050D;BnaC05g31460D;BnaC04g07710D;BnaCnng27210D;BnaA01g04780D;BnaAnng10090D;BnaC09g34350D;BnaA03g24720D;BnaA07g18900D;BnaC08g13040D;BnaC01g15760D;BnaA05g10480D;BnaA08g28620D;BnaC03g16140D;BnaC05g14940D;BnaC03g67980D;BnaA02g35330D;BnaCnng33690D;BnaC04g25500D;BnaA02g31990D;BnaA09g05190D;BnaA06g09900D;BnaC01g10130D;BnaC02g40580D;BnaA02g…
GO0010540	basipetal auxin transport	4	490	49	47438	0.00164979	0.0118456	8.57851	BnaA01g06180D;BnaC03g67810D;BnaC01g07450D;BnaA08g12770D
GO0016684	oxidoreductase activity, acting on peroxide as acceptor	8	490	211	47438	0.00168669	0.012077	3.82192	BnaA08g06260D;BnaAnng04520D;BnaC07g15270D;BnaC07g43770D;BnaA05g33880D;BnaC08g06690D;BnaC06g32660D;BnaC05g27530D
GO0048523	negative regulation of cellular process	56	490	3539	47438	0.00174326	0.0124478	1.61022	BnaA06g38950D;BnaC02g09390D;BnaA09g40670D;BnaC04g07710D;BnaC05g41830D;BnaCnng27210D;BnaC05g38410D;BnaC04g07760D;BnaC07g36050D;BnaAnng23990D;BnaAnng23920D;BnaC09g34350D;BnaA10g11080D;BnaAnng20740D;BnaA08g28620D;BnaA03g24900D;BnaC03g72930D;BnaC06g38200D;BnaA05g27660D;BnaA07g30430D;BnaC08g49040D;BnaA10g14100D;BnaCnng62150D;BnaC01g18020D;BnaA08g18790D;BnaC09g53650D;BnaA01g37370D;BnaA01g15250D;BnaA06g…
GO0035264	multicellular organism growth	3	490	24	47438	0.00188645	0.0134332	13.7656	BnaA08g18790D;BnaC03g58080D;BnaC05g21480D
GO1901360	organic cyclic compound metabolic process	61	490	8373	47438	0.00191415	0.0135931	0.660936	BnaC03g58870D;BnaA06g38950D;BnaA10g18700D;BnaA09g27040D;BnaAnng34010D;BnaC08g28550D;BnaC02g09390D;BnaAnng20200D;BnaA04g17560D;BnaA06g11500D;BnaC08g11410D;BnaCnng37100D;BnaC07g35800D;BnaC03g24530D;BnaA05g05760D;BnaC07g33090D;BnaA01g13700D;BnaC01g16080D;BnaA10g14100D;BnaA02g31990D;BnaC02g40580D;BnaC02g13860D;BnaC07g28040D;BnaC03g74750D;BnaA03g11410D;BnaC05g13120D;BnaC02g44850D;BnaC01g01500D;BnaC04g…
GO0019748	secondary metabolic process	24	490	1192	47438	0.00201315	0.014257	2.01864	BnaA04g17560D;BnaA06g11500D;BnaC05g42570D;BnaAnng31420D;BnaC04g50320D;BnaC01g01500D;BnaC07g26280D;BnaC04g41120D;BnaC01g01490D;BnaC08g24280D;BnaA06g18440D;BnaC08g30370D;BnaA10g02480D;BnaCnng47950D;BnaC02g35940D;BnaC02g38400D;BnaAnng26570D;BnaA09g33460D;BnaA09g55500D;BnaC03g61120D;BnaC04g22420D;BnaC01g41470D;BnaA06g30390D;BnaC08g37940D
GO0015672	monovalent inorganic cation transport	18	490	797	47438	0.00208481	0.0147243	2.26018	BnaA09g09830D;BnaA08g06260D;BnaAnng04520D;BnaC06g13300D;BnaA04g21850D;BnaCnng57580D;BnaA10g18740D;BnaA03g11410D;BnaCnng44750D;BnaA06g01060D;BnaA10g16170D;BnaA09g34030D;BnaC08g06690D;BnaA05g14600D;BnaC02g39630D;BnaC05g27530D;BnaA07g15180D;BnaC04g45720D
GO0010030	positive regulation of seed germination	6	490	127	47438	0.00212803	0.0149736	4.79752	BnaA09g13300D;BnaC03g24530D;BnaAnng20740D;BnaCnng62150D;BnaC08g48460D;BnaA06g16270D
GO0017113	dihydropyrimidine dehydrogenase (NADP+) activity	2	490	7	47438	0.00216054	0.0149736	38.4779	BnaC01g34640D;BnaA01g27800D
GO0051864	histone demethylase activity (H3-K36 specific)	2	490	7	47438	0.00216054	0.0149736	38.4779	BnaC05g31460D;BnaA05g20100D
GO0070544	histone H3-K36 demethylation	2	490	7	47438	0.00216054	0.0149736	38.4779	BnaC05g31460D;BnaA05g20100D
GO1901999	homogentisate metabolic process	2	490	7	47438	0.00216054	0.0149736	38.4779	BnaC02g13840D;BnaA02g09890D
GO1902000	homogentisate catabolic process	2	490	7	47438	0.00216054	0.0149736	38.4779	BnaC02g13840D;BnaA02g09890D
GO1903664	regulation of asexual reproduction	2	490	7	47438	0.00216054	0.0149736	38.4779	BnaC08g24280D;BnaA09g33460D
GO0031324	negative regulation of cellular metabolic process	36	490	2034	47438	0.00221927	0.0153396	1.78394	BnaA06g38950D;BnaC02g09390D;BnaC04g07710D;BnaCnng27210D;BnaC05g38410D;BnaC04g07760D;BnaC07g36050D;BnaAnng23990D;BnaA10g11080D;BnaAnng20740D;BnaA08g28620D;BnaA03g24900D;BnaC03g72930D;BnaC06g38200D;BnaA10g14100D;BnaCnng62150D;BnaA08g18790D;BnaC09g53650D;BnaA06g13250D;BnaA01g26030D;BnaC03g58080D;BnaC05g14810D;BnaC03g39000D;BnaC07g39210D;BnaA08g17540D;BnaC08g37780D;BnaA02g05510D;BnaA08g23150D;BnaC08g…
GO0010183	pollen tube guidance	5	490	89	47438	0.0023476	0.0161405	5.7516	BnaCnng33690D;BnaC05g11630D;BnaA06g10010D;BnaA06g18440D;BnaA01g24820D
GO0050918	positive chemotaxis	5	490	89	47438	0.0023476	0.0161405	5.7516	BnaCnng33690D;BnaC05g11630D;BnaA06g10010D;BnaA06g18440D;BnaA01g24820D
GO0051252	regulation of RNA metabolic process	51	490	7232	47438	0.00235832	0.0161713	0.643344	BnaA05g12950D;BnaA06g02010D;BnaC05g31460D;BnaC01g01940D;BnaC04g07710D;BnaCnng27210D;BnaC03g52080D;BnaC05g38410D;BnaC04g07760D;BnaAnng23990D;BnaC08g31770D;BnaC04g50970D;BnaC06g05930D;BnaA05g01190D;BnaA08g18790D;BnaA06g21470D;BnaAnng01320D;BnaA06g13250D;BnaC06g05090D;BnaA01g26030D;BnaC03g58080D;BnaC03g52390D;BnaC05g14810D;BnaC03g39000D;BnaC06g38360D;BnaC08g26910D;BnaA08g17540D;BnaAnng26200D;BnaCnng…
GO0009066	aspartate family amino acid metabolic process	7	490	176	47438	0.00247975	0.0169145	4.01158	BnaA01g03680D;BnaC01g05030D;BnaC03g04830D;BnaC05g06260D;BnaA03g03400D;BnaA09g53100D;BnaCnng72260D
GO0042737	drug catabolic process	7	490	176	47438	0.00247975	0.0169145	4.01158	BnaC07g15270D;BnaA06g13760D;BnaC07g43770D;BnaC01g34640D;BnaC05g15180D;BnaA01g34980D;BnaA01g27800D
GO0042744	hydrogen peroxide catabolic process	4	490	55	47438	0.00252974	0.0172102	7.5683	BnaC07g15270D;BnaA06g13760D;BnaC07g43770D;BnaC05g15180D
GO0051649	establishment of localization in cell	10	490	2243	47438	0.00260097	0.0176485	0.41718	BnaAnng13010D;BnaC01g10130D;BnaC07g48820D;BnaA03g11410D;BnaA05g05010D;BnaC03g08040D;BnaA01g11390D;BnaC01g06260D;BnaC08g24040D;BnaA09g33230D
GO0042631	cellular response to water deprivation	6	490	133	47438	0.00268093	0.0181392	4.57028	BnaCnng37450D;BnaA03g26220D;BnaC03g73200D;BnaCnng63310D;BnaA07g03740D;BnaA09g53100D
GO0022402	cell cycle process	4	490	1395	47438	0.0026905	0.0181392	0.269558	BnaC05g31460D;BnaA06g21560D;BnaC03g12400D;BnaA05g20100D
GO0022626	cytosolic ribosome	2	490	1029	47438	0.00269463	0.0181392	0.183253	BnaC07g15270D;BnaC05g00780D
GO0046912	transferase activity, transferring acyl groups, acyl groups converted into alkyl on transfer	4	490	56	47438	0.00270239	0.0181392	7.4226	BnaC04g52580D;BnaA05g03050D;BnaA07g08220D;BnaA05g03080D
GO0007010	cytoskeleton organization	2	490	1034	47438	0.00270828	0.0181392	0.182345	BnaC02g39950D;BnaA06g21560D
GO0006869	lipid transport	10	490	334	47438	0.00271645	0.018147	2.99794	BnaC07g11810D;BnaA07g08700D;BnaC04g45790D;BnaA08g18690D;BnaC03g36390D;BnaA09g32110D;BnaA04g22080D;BnaC04g06760D;BnaA09g27660D;BnaC04g45800D
GO0006538	glutamate catabolic process	2	490	8	47438	0.00286105	0.0184473	32.0642	BnaCnng33690D;BnaA01g24820D
GO0006540	glutamate decarboxylation to succinate	2	490	8	47438	0.00286105	0.0184473	32.0642	BnaCnng33690D;BnaA01g24820D
GO0009448	gamma-aminobutyric acid metabolic process	2	490	8	47438	0.00286105	0.0184473	32.0642	BnaCnng33690D;BnaA01g24820D
GO0009450	gamma-aminobutyric acid catabolic process	2	490	8	47438	0.00286105	0.0184473	32.0642	BnaCnng33690D;BnaA01g24820D
GO0009671	nitrateproton symporter activity	2	490	8	47438	0.00286105	0.0184473	32.0642	BnaC06g13300D;BnaA07g15180D
GO0015976	carbon utilization	2	490	8	47438	0.00286105	0.0184473	32.0642	BnaC08g21320D;BnaC01g26220D
GO0016417	S-acyltransferase activity	2	490	8	47438	0.00286105	0.0184473	32.0642	BnaC03g34940D;BnaA03g29700D
GO0030582	reproductive fruiting body development	2	490	8	47438	0.00286105	0.0184473	32.0642	BnaC08g24280D;BnaA09g33460D
GO0030584	sporocarp development	2	490	8	47438	0.00286105	0.0184473	32.0642	BnaC08g24280D;BnaA09g33460D
GO0030955	potassium ion binding	2	490	8	47438	0.00286105	0.0184473	32.0642	BnaCnng37100D;BnaC02g44850D
GO0033106	cis-Golgi network membrane	2	490	8	47438	0.00286105	0.0184473	32.0642	BnaC09g34350D;BnaA10g12140D
GO0043938	positive regulation of sporulation	2	490	8	47438	0.00286105	0.0184473	32.0642	BnaC08g24280D;BnaA09g33460D
GO0075259	spore-bearing structure development	2	490	8	47438	0.00286105	0.0184473	32.0642	BnaC08g24280D;BnaA09g33460D
GO1903942	positive regulation of respiratory gaseous exchange	2	490	8	47438	0.00286105	0.0184473	32.0642	BnaC08g21320D;BnaC01g26220D
GO0043928	exonucleolytic catabolism of deadenylated mRNA	4	490	57	47438	0.00288295	0.0185425	7.2824	BnaA06g38950D;BnaC02g09390D;BnaA10g14100D;BnaA02g05510D
GO0016887	ATPase activity	6	490	1692	47438	0.00293729	0.0188452	0.332799	BnaA09g09830D;BnaA08g28620D;BnaC03g16140D;BnaC09g27270D;BnaCnng44750D;BnaA06g21560D
GO0051187	obsolete cofactor catabolic process	6	490	138	47438	0.00321855	0.0205987	4.39669	BnaA09g27040D;BnaC07g15270D;BnaA06g13760D;BnaC07g43770D;BnaC05g15180D;BnaA06g38800D
GO0008106	alcohol dehydrogenase (NADP+) activity	3	490	29	47438	0.00327805	0.0208764	11.1172	BnaA03g17400D;BnaC03g72040D;BnaA04g00820D
GO0010117	photoprotection	3	490	29	47438	0.00327805	0.0208764	11.1172	BnaA08g18790D;BnaC03g58080D;BnaC05g21480D
GO0071462	cellular response to water stimulus	6	490	139	47438	0.00333506	0.0211874	4.36354	BnaCnng37450D;BnaA03g26220D;BnaC03g73200D;BnaCnng63310D;BnaA07g03740D;BnaA09g53100D
GO0010038	response to metal ion	31	490	1740	47438	0.00345383	0.0218883	1.7878	BnaA09g13300D;BnaA03g00260D;BnaC03g00160D;BnaA08g06260D;BnaAnng04520D;BnaC07g15270D;BnaC04g53560D;BnaC04g07760D;BnaC04g53550D;BnaCnng37100D;BnaA06g24600D;BnaC06g38200D;BnaCnng33690D;BnaC04g51630D;BnaA09g29060D;BnaC04g53580D;BnaC04g22390D;BnaC02g44850D;BnaAnng30320D;BnaA05g34880D;BnaC08g06690D;BnaAnng13720D;BnaC04g53030D;BnaC04g28590D;BnaC08g48460D;BnaA06g16270D;BnaA05g03420D;BnaC05g27530D;BnaA07g…
GO0005654	nucleoplasm	10	490	2231	47438	0.00348434	0.0220278	0.419546	BnaC05g31460D;BnaC04g07710D;BnaC05g38410D;BnaC02g48590D;BnaC03g39000D;BnaCnng63660D;BnaA05g21090D;BnaC05g33960D;BnaA06g28310D;BnaA05g20100D
GO0003985	acetyl-CoA C-acetyltransferase activity	2	490	9	47438	0.00365339	0.0227088	27.483	BnaC09g20370D;BnaA09g18440D
GO0016453	C-acetyltransferase activity	2	490	9	47438	0.00365339	0.0227088	27.483	BnaC09g20370D;BnaA09g18440D
GO0030742	GTP-dependent protein binding	2	490	9	47438	0.00365339	0.0227088	27.483	BnaA05g28630D;BnaC05g43080D
GO0032029	myosin tail binding	2	490	9	47438	0.00365339	0.0227088	27.483	BnaA05g28630D;BnaC05g43080D
GO0048315	conidium formation	2	490	9	47438	0.00365339	0.0227088	27.483	BnaC08g24280D;BnaA09g33460D
GO0061794	conidium development	2	490	9	47438	0.00365339	0.0227088	27.483	BnaC08g24280D;BnaA09g33460D
GO0080115	myosin XI tail binding	2	490	9	47438	0.00365339	0.0227088	27.483	BnaA05g28630D;BnaC05g43080D
GO0006595	polyamine metabolic process	4	490	61	47438	0.00368766	0.022867	6.77077	BnaC03g06000D;BnaC03g28300D;BnaA03g04460D;BnaA03g23800D
GO0070647	protein modification by small protein conjugation or removal	8	490	1907	47438	0.00369897	0.0228824	0.393734	BnaCnng37520D;BnaC07g36050D;BnaC02g48590D;BnaA03g06670D;BnaC01g06260D;BnaC03g08540D;BnaC07g34380D;BnaC07g20360D
GO1903959	regulation of anion transmembrane transport	4	490	62	47438	0.0039103	0.024093	6.6539	BnaC05g41830D;BnaAnng23920D;BnaA05g27660D;BnaA01g37370D
GO0048046	apoplast	22	490	1114	47438	0.00391325	0.024093	1.97401	BnaA08g06260D;BnaAnng04520D;BnaCnng55020D;BnaC03g59270D;BnaCnng07500D;BnaC01g20120D;BnaA02g04990D;BnaC07g50320D;BnaA07g04700D;BnaC08g06690D;BnaA01g16530D;BnaC04g53030D;BnaA07g17230D;BnaCnng30450D;BnaC08g48460D;BnaA06g16270D;BnaC03g24360D;BnaA05g03420D;BnaA02g04260D;BnaC05g27530D;BnaA03g20340D;BnaC05g46300D
GO0071944	cell periphery	138	490	10724	47438	0.00395826	0.0243123	1.34664	BnaA10g18700D;BnaA09g13300D;BnaC08g21320D;BnaA09g09830D;BnaA08g06260D;BnaC07g11810D;BnaA07g08700D;BnaAnng04520D;BnaCnng37450D;BnaC03g19520D;BnaAnng23050D;BnaC09g37560D;BnaCnng55020D;BnaA04g17560D;BnaC04g00160D;BnaC03g59270D;BnaC07g15270D;BnaC03g59660D;BnaC08g13910D;BnaA03g24720D;BnaC04g15750D;BnaC03g47100D;BnaC03g17600D;BnaC01g14990D;BnaAnng20740D;BnaC06g12160D;BnaA03g16250D;BnaA08g16310D;BnaA06g…
GO0009404	toxin metabolic process	7	490	192	47438	0.00400659	0.024551	3.66338	BnaA06g11500D;BnaC04g50320D;BnaC08g24280D;BnaA06g18440D;BnaA09g33460D;BnaC01g41470D;BnaC08g37940D
GO0017004	cytochrome complex assembly	4	490	63	47438	0.00414187	0.0253201	6.54098	BnaAnng34010D;BnaA02g31990D;BnaA06g09900D;BnaC02g40580D
GO0070925	organelle assembly	1	490	811	47438	0.00419407	0.0255789	0.116484	BnaA06g21560D
GO0009636	response to toxic substance	21	490	1044	47438	0.00449469	0.0272767	2.01011	BnaA03g00260D;BnaC03g00160D;BnaA08g06260D;BnaAnng04520D;BnaA06g11500D;BnaC07g15270D;BnaA06g13760D;BnaA03g26220D;BnaC03g73200D;BnaC07g43770D;BnaAnng01320D;BnaC04g22390D;BnaA05g33880D;BnaC08g06690D;BnaC06g32660D;BnaC04g53030D;BnaC02g42410D;BnaA05g03420D;BnaC05g27530D;BnaC05g15180D;BnaC08g37940D
GO0004350	glutamate-5-semialdehyde dehydrogenase activity	2	490	10	47438	0.0045356	0.0272767	24.0471	BnaA05g05760D;BnaC04g05620D
GO0016710	trans-cinnamate 4-monooxygenase activity	2	490	10	47438	0.0045356	0.0272767	24.0471	BnaA04g17560D;BnaC04g41120D
GO0032036	myosin heavy chain binding	2	490	10	47438	0.0045356	0.0272767	24.0471	BnaA05g28630D;BnaC05g43080D
GO0043576	regulation of respiratory gaseous exchange	2	490	10	47438	0.0045356	0.0272767	24.0471	BnaC08g21320D;BnaC01g26220D
GO1905157	positive regulation of photosynthesis	2	490	10	47438	0.0045356	0.0272767	24.0471	BnaC08g21320D;BnaC01g26220D
GO0016773	phosphotransferase activity, alcohol group as acceptor	16	490	2948	47438	0.0045856	0.0275136	0.506744	BnaA05g29500D;BnaC08g13910D;BnaCnng37100D;BnaC01g03320D;BnaA06g15030D;BnaA01g06180D;BnaC03g67810D;BnaC01g28850D;BnaC01g07450D;BnaC08g48860D;BnaC02g44850D;BnaA06g18440D;BnaA08g12770D;BnaC05g43850D;BnaC01g06260D;BnaC04g43980D
GO0072529	pyrimidine-containing compound catabolic process	3	490	33	47438	0.0047477	0.0284204	9.63409	BnaAnng20200D;BnaC01g34640D;BnaA01g27800D
GO0008104	protein localization	9	490	2046	47438	0.00480175	0.0286778	0.412533	BnaC08g28550D;BnaC04g07710D;BnaAnng13010D;BnaC07g48820D;BnaA05g05010D;BnaC03g08040D;BnaA01g11390D;BnaC08g24040D;BnaA09g33230D
GO0006641	triglyceride metabolic process	6	490	150	47438	0.00483303	0.0287982	4.02927	BnaC03g19520D;BnaC06g12160D;BnaA03g16250D;BnaA05g12980D;BnaC07g23920D;BnaA06g32640D
GO0019439	aromatic compound catabolic process	16	490	735	47438	0.00503764	0.0298835	2.17034	BnaA06g38950D;BnaA09g27040D;BnaC02g09390D;BnaAnng20200D;BnaA06g11500D;BnaCnng37100D;BnaA10g14100D;BnaC02g13860D;BnaC02g44850D;BnaA02g05510D;BnaC02g13840D;BnaA02g09890D;BnaA04g07260D;BnaA02g09960D;BnaC08g37940D;BnaA06g38800D
GO0048583	regulation of response to stimulus	53	490	3473	47438	0.00503823	0.0298835	1.54361	BnaA09g40670D;BnaC04g07710D;BnaC05g41830D;BnaC05g38410D;BnaC04g07760D;BnaAnng23990D;BnaAnng23920D;BnaC09g34350D;BnaA05g10480D;BnaA06g13760D;BnaC03g16140D;BnaA03g26220D;BnaA05g27660D;BnaC03g73200D;BnaA07g30430D;BnaC08g49040D;BnaC01g18020D;BnaC07g48820D;BnaA01g37370D;BnaA01g15250D;BnaA06g13250D;BnaC05g13120D;BnaC09g27270D;BnaA05g02510D;BnaC03g52390D;BnaC05g14810D;BnaC03g39000D;BnaA08g17540D;BnaC06g…
GO0009615	response to virus	8	490	253	47438	0.00508582	0.0300969	3.16389	BnaC04g07760D;BnaC08g31770D;BnaC04g50970D;BnaA05g01190D;BnaA06g15030D;BnaC04g53030D;BnaA05g03420D;BnaC04g00750D
GO0007623	circadian rhythm	10	490	366	47438	0.00514762	0.0303933	2.72659	BnaA05g12950D;BnaC05g31460D;BnaA07g18900D;BnaC03g48070D;BnaA06g25550D;BnaC02g15270D;BnaCnng37560D;BnaA02g10970D;BnaCnng13410D;BnaA05g20100D
GO0048511	rhythmic process	10	490	367	47438	0.00524453	0.0308814	2.7189	BnaA05g12950D;BnaC05g31460D;BnaA07g18900D;BnaC03g48070D;BnaA06g25550D;BnaC02g15270D;BnaCnng37560D;BnaA02g10970D;BnaCnng13410D;BnaA05g20100D
GO0048585	negative regulation of response to stimulus	23	490	1200	47438	0.00525412	0.0308814	1.91525	BnaA09g40670D;BnaC05g41830D;BnaC05g38410D;BnaAnng23920D;BnaC09g34350D;BnaA05g27660D;BnaA07g30430D;BnaC08g49040D;BnaC01g18020D;BnaA01g37370D;BnaA01g15250D;BnaA05g02510D;BnaC03g39000D;BnaC06g33910D;BnaA03g47830D;BnaA10g15140D;BnaC04g02270D;BnaA09g47670D;BnaA10g12140D;BnaC07g40100D;BnaC01g06260D;BnaC09g37480D;BnaA06g27640D
GO0006468	protein phosphorylation	14	490	2650	47438	0.00547792	0.0313646	0.494421	BnaA05g29500D;BnaC08g13910D;BnaC01g03320D;BnaA06g15030D;BnaA01g06180D;BnaC03g67810D;BnaC01g28850D;BnaC01g07450D;BnaC08g48860D;BnaA06g18440D;BnaA08g12770D;BnaC05g43850D;BnaC01g06260D;BnaC04g43980D
GO0003979	UDP-glucose 6-dehydrogenase activity	2	490	11	47438	0.00550575	0.0313646	21.3748	BnaA10g18700D;BnaC09g42430D
GO0004838	L-tyrosine2-oxoglutarate aminotransferase activity	2	490	11	47438	0.00550575	0.0313646	21.3748	BnaC02g13860D;BnaA02g09960D
GO0009865	pollen tube adhesion	2	490	11	47438	0.00550575	0.0313646	21.3748	BnaCnng33690D;BnaA01g24820D
GO0018973	trinitrotoluene metabolic process	2	490	11	47438	0.00550575	0.0313646	21.3748	BnaA06g11500D;BnaC08g37940D
GO0018974	2,4,6-trinitrotoluene metabolic process	2	490	11	47438	0.00550575	0.0313646	21.3748	BnaA06g11500D;BnaC08g37940D
GO0019326	nitrotoluene metabolic process	2	490	11	47438	0.00550575	0.0313646	21.3748	BnaA06g11500D;BnaC08g37940D
GO0033481	galacturonate biosynthetic process	2	490	11	47438	0.00550575	0.0313646	21.3748	BnaA03g50170D;BnaC07g42640D
GO0046256	2,4,6-trinitrotoluene catabolic process	2	490	11	47438	0.00550575	0.0313646	21.3748	BnaA06g11500D;BnaC08g37940D
GO0046260	trinitrotoluene catabolic process	2	490	11	47438	0.00550575	0.0313646	21.3748	BnaA06g11500D;BnaC08g37940D
GO0046263	nitrotoluene catabolic process	2	490	11	47438	0.00550575	0.0313646	21.3748	BnaA06g11500D;BnaC08g37940D
GO0070547	L-tyrosine aminotransferase activity	2	490	11	47438	0.00550575	0.0313646	21.3748	BnaC02g13860D;BnaA02g09960D
GO0072490	toluene-containing compound metabolic process	2	490	11	47438	0.00550575	0.0313646	21.3748	BnaA06g11500D;BnaC08g37940D
GO0072491	toluene-containing compound catabolic process	2	490	11	47438	0.00550575	0.0313646	21.3748	BnaA06g11500D;BnaC08g37940D
GO0043467	regulation of generation of precursor metabolites and energy	5	490	109	47438	0.00559054	0.0317453	4.64354	BnaA10g11080D;BnaA08g28620D;BnaC06g38200D;BnaC09g53650D;BnaA07g33590D
GO0005779	integral component of peroxisomal membrane	3	490	35	47438	0.00560932	0.0317453	9.03157	BnaA07g18900D;BnaC07g28040D;BnaCnng13410D
GO0031231	intrinsic component of peroxisomal membrane	3	490	35	47438	0.00560932	0.0317453	9.03157	BnaA07g18900D;BnaC07g28040D;BnaCnng13410D
GO0006790	sulfur compound metabolic process	20	490	989	47438	0.00583335	0.0329413	2.01915	BnaC03g58870D;BnaA06g11500D;BnaA06g13760D;BnaC01g01500D;BnaC07g26280D;BnaAnng14080D;BnaC01g01490D;BnaA06g18440D;BnaA09g53100D;BnaC08g30370D;BnaCnng47950D;BnaC02g38400D;BnaA09g55500D;BnaC05g15180D;BnaA02g13370D;BnaC04g22420D;BnaC01g41470D;BnaA06g30390D;BnaC08g37940D;BnaA06g38800D
GO0048608	reproductive structure development	54	490	3597	47438	0.00586369	0.032969	1.51732	BnaCnng37520D;BnaA09g27040D;BnaA03g00260D;BnaC03g00160D;BnaCnng55020D;BnaC01g01940D;BnaC08g13910D;BnaCnng37100D;BnaCnng27950D;BnaC06g38200D;BnaC07g43770D;BnaCnng33690D;BnaC04g25500D;BnaA09g32380D;BnaA06g00850D;BnaA09g35800D;BnaA09g05190D;BnaA06g09900D;BnaC01g00680D;BnaC04g28570D;BnaC05g11630D;BnaC08g26260D;BnaA04g03610D;BnaC04g45790D;BnaA06g13250D;BnaC02g44850D;BnaA01g26030D;BnaC05g14810D;BnaA06g…
GO0061458	reproductive system development	54	490	3597	47438	0.00586369	0.032969	1.51732	BnaCnng37520D;BnaA09g27040D;BnaA03g00260D;BnaC03g00160D;BnaCnng55020D;BnaC01g01940D;BnaC08g13910D;BnaCnng37100D;BnaCnng27950D;BnaC06g38200D;BnaC07g43770D;BnaCnng33690D;BnaC04g25500D;BnaA09g32380D;BnaA06g00850D;BnaA09g35800D;BnaA09g05190D;BnaA06g09900D;BnaC01g00680D;BnaC04g28570D;BnaC05g11630D;BnaC08g26260D;BnaA04g03610D;BnaC04g45790D;BnaA06g13250D;BnaC02g44850D;BnaA01g26030D;BnaC05g14810D;BnaA06g…
GO0007568	aging	14	490	594	47438	0.00594713	0.0333657	2.35132	BnaC09g34350D;BnaA03g26220D;BnaC03g73200D;BnaC03g04830D;BnaC02g15270D;BnaAnng26200D;BnaA03g03400D;BnaCnng37560D;BnaC04g53030D;BnaC06g34480D;BnaA10g12140D;BnaA05g03420D;BnaA02g10970D;BnaC03g45280D
GO0009922	fatty acid elongase activity	3	490	36	47438	0.00607292	0.0339979	8.7577	BnaA09g28510D;BnaC05g00780D;BnaA10g02480D
GO0017001	antibiotic catabolic process	4	490	71	47438	0.00633468	0.0353868	5.75898	BnaC07g15270D;BnaA06g13760D;BnaC07g43770D;BnaC05g15180D
GO0042886	amide transport	8	490	1834	47438	0.00642471	0.0358126	0.410138	BnaC08g28550D;BnaAnng13010D;BnaC07g48820D;BnaA05g05010D;BnaC03g08040D;BnaA01g11390D;BnaC08g24040D;BnaA09g33230D
GO0034613	cellular protein localization	8	490	1853	47438	0.00652754	0.035883	0.405744	BnaC04g07710D;BnaAnng13010D;BnaC07g48820D;BnaA05g05010D;BnaC03g08040D;BnaA01g11390D;BnaC08g24040D;BnaA09g33230D
GO0006022	aminoglycan metabolic process	3	490	37	47438	0.00655874	0.035883	8.49994	BnaA10g18700D;BnaA01g34980D;BnaC09g42430D
GO0003978	UDP-glucose 4-epimerase activity	2	490	12	47438	0.00656194	0.035883	19.2369	BnaC01g15760D;BnaA01g13540D
GO0005432	calciumsodium antiporter activity	2	490	12	47438	0.00656194	0.035883	19.2369	BnaA06g01060D;BnaA05g14600D
GO0006562	proline catabolic process	2	490	12	47438	0.00656194	0.035883	19.2369	BnaC03g74750D;BnaA06g22040D
GO0010133	proline catabolic process to glutamate	2	490	12	47438	0.00656194	0.035883	19.2369	BnaC03g74750D;BnaA06g22040D
GO0042645	mitochondrial nucleoid	2	490	12	47438	0.00656194	0.035883	19.2369	BnaC03g34940D;BnaA03g29700D
GO0098740	obsolete multi organism cell adhesion	2	490	12	47438	0.00656194	0.035883	19.2369	BnaCnng33690D;BnaA01g24820D
GO1901402	negative regulation of tetrapyrrole metabolic process	2	490	12	47438	0.00656194	0.035883	19.2369	BnaA03g24900D;BnaC03g72930D
GO0016071	mRNA metabolic process	4	490	1268	47438	0.00673382	0.0367454	0.297468	BnaA06g38950D;BnaC02g09390D;BnaA10g14100D;BnaA02g05510D
GO0031224	intrinsic component of membrane	44	490	2812	47438	0.00676412	0.0368332	1.57463	BnaA09g09830D;BnaC07g11810D;BnaA07g08700D;BnaC09g37560D;BnaC03g52730D;BnaA09g42610D;BnaC02g33350D;BnaA03g24720D;BnaC03g47100D;BnaA07g18900D;BnaC08g13040D;BnaC09g40960D;BnaC04g25500D;BnaCnng07500D;BnaC01g20120D;BnaC02g13250D;BnaA09g05190D;BnaA02g34140D;BnaA04g00600D;BnaA10g18740D;BnaC08g26260D;BnaC07g28040D;BnaA04g03610D;BnaC04g22390D;BnaA03g11410D;BnaA08g18690D;BnaC09g42490D;BnaA10g15190D;BnaC07g…
GO0006357	regulation of transcription by RNA polymerase II	6	490	1539	47438	0.00679091	0.0369015	0.367251	BnaC04g07760D;BnaCnng63660D;BnaA05g21090D;BnaC05g33960D;BnaC06g04380D;BnaA06g02490D
GO0032446	protein modification by small protein conjugation	7	490	1717	47438	0.00687567	0.037258	0.383405	BnaCnng37520D;BnaC07g36050D;BnaC02g48590D;BnaA03g06670D;BnaC01g06260D;BnaC03g08540D;BnaC07g20360D
GO0000302	response to reactive oxygen species	15	490	692	47438	0.00688525	0.037258	2.15833	BnaA09g13300D;BnaA03g00260D;BnaC03g00160D;BnaC07g15270D;BnaA03g26220D;BnaC03g73200D;BnaC07g43770D;BnaAnng01320D;BnaA03g60000D;BnaA05g33880D;BnaC02g15270D;BnaC09g16820D;BnaC02g42410D;BnaA02g10970D;BnaC01g41470D
GO0000175	3'-5'-exoribonuclease activity	4	490	73	47438	0.006983	0.0377082	5.59182	BnaA06g38950D;BnaC02g09390D;BnaA10g14100D;BnaA02g05510D
GO0005750	mitochondrial respiratory chain complex III	3	490	38	47438	0.00706705	0.0380037	8.25691	BnaAnng34010D;BnaA02g31990D;BnaC02g40580D
GO0045275	respiratory chain complex III	3	490	38	47438	0.00706705	0.0380037	8.25691	BnaAnng34010D;BnaA02g31990D;BnaC02g40580D
GO0006629	lipid metabolic process	37	490	2258	47438	0.00719812	0.0386284	1.64484	BnaC04g52580D;BnaA09g27040D;BnaC09g20370D;BnaC03g19520D;BnaC08g11410D;BnaCnng37100D;BnaC07g35800D;BnaC06g12160D;BnaA05g10480D;BnaA03g16250D;BnaA05g12980D;BnaC07g33090D;BnaA01g13700D;BnaC01g16080D;BnaC07g23920D;BnaA09g32380D;BnaC01g00680D;BnaA05g03050D;BnaC04g28570D;BnaCnng09200D;BnaC07g28040D;BnaA03g60000D;BnaC02g44850D;BnaC04g50320D;BnaA09g18440D;BnaA05g33880D;BnaA04g04400D;BnaA06g32640D;BnaC09g…
GO0030003	cellular cation homeostasis	12	490	511	47438	0.00749164	0.0399286	2.33684	BnaA03g00260D;BnaA05g29010D;BnaC03g00160D;BnaC05g43490D;BnaC02g33350D;BnaA04g21850D;BnaC04g51630D;BnaC07g20310D;BnaAnng11680D;BnaC02g39630D;BnaA02g25550D;BnaC04g45720D
GO0036094	small molecule binding	28	490	1599	47438	0.00756988	0.0399286	1.75055	BnaA01g36810D;BnaA08g06260D;BnaAnng04520D;BnaA03g17400D;BnaC04g00160D;BnaC04g53560D;BnaC04g53550D;BnaAnng13010D;BnaAnng19740D;BnaC03g72040D;BnaCnng63310D;BnaC03g06000D;BnaC04g53580D;BnaAnng30320D;BnaA05g34880D;BnaA03g04460D;BnaC08g06690D;BnaAnng13720D;BnaA09g53100D;BnaC02g10080D;BnaC05g27530D;BnaA06g36140D;BnaC07g18960D;BnaC01g32420D;BnaC03g73550D;BnaC03g45280D;BnaA05g00280D;BnaA06g38800D
GO0070838	divalent metal ion transport	11	490	449	47438	0.00759329	0.0399286	2.43854	BnaA08g06260D;BnaAnng04520D;BnaA04g21850D;BnaC04g51630D;BnaA10g18740D;BnaA06g01060D;BnaC08g06690D;BnaC03g27400D;BnaA05g14600D;BnaC05g27530D;BnaC04g45720D
GO0016208	AMP binding	3	490	39	47438	0.00759809	0.0399286	8.02738	BnaC04g00160D;BnaC03g73550D;BnaA05g00280D
GO0000278	mitotic cell cycle	2	490	927	47438	0.0076131	0.0399286	0.203912	BnaC05g31460D;BnaA05g20100D
GO0019222	regulation of metabolic process	86	490	10670	47438	0.00766902	0.0399286	0.731373	BnaA06g38950D;BnaA05g12950D;BnaC08g21320D;BnaA06g02010D;BnaC02g09390D;BnaC09g37560D;BnaC05g31460D;BnaC01g01940D;BnaC04g07710D;BnaCnng27210D;BnaC03g52080D;BnaC05g38410D;BnaC04g07760D;BnaC07g36050D;BnaA05g29500D;BnaAnng23990D;BnaA02g26610D;BnaA10g11080D;BnaAnng20740D;BnaC08g31770D;BnaA08g28620D;BnaC04g50970D;BnaA03g24900D;BnaC02g48590D;BnaC03g72930D;BnaC06g38200D;BnaC06g05930D;BnaA05g01190D;BnaA10g…
GO0046907	intracellular transport	10	490	2109	47438	0.00767486	0.0399286	0.445143	BnaAnng13010D;BnaC01g10130D;BnaC07g48820D;BnaA03g11410D;BnaA05g05010D;BnaC03g08040D;BnaA01g11390D;BnaC01g06260D;BnaC08g24040D;BnaA09g33230D
GO0005947	mitochondrial alpha-ketoglutarate dehydrogenase complex	2	490	13	47438	0.00770228	0.0399286	17.4877	BnaC03g34940D;BnaA03g29700D
GO0006065	UDP-glucuronate biosynthetic process	2	490	13	47438	0.00770228	0.0399286	17.4877	BnaA10g18700D;BnaC09g42430D
GO0006553	lysine metabolic process	2	490	13	47438	0.00770228	0.0399286	17.4877	BnaA01g03680D;BnaC01g05030D
GO0009085	lysine biosynthetic process	2	490	13	47438	0.00770228	0.0399286	17.4877	BnaA01g03680D;BnaC01g05030D
GO0015296	anioncation symporter activity	2	490	13	47438	0.00770228	0.0399286	17.4877	BnaC06g13300D;BnaA07g15180D
GO0030062	mitochondrial tricarboxylic acid cycle enzyme complex	2	490	13	47438	0.00770228	0.0399286	17.4877	BnaC03g34940D;BnaA03g29700D
GO0030436	asexual sporulation	2	490	13	47438	0.00770228	0.0399286	17.4877	BnaC08g24280D;BnaA09g33460D
GO0042135	neurotransmitter catabolic process	2	490	13	47438	0.00770228	0.0399286	17.4877	BnaCnng33690D;BnaA01g24820D
GO0045239	tricarboxylic acid cycle enzyme complex	2	490	13	47438	0.00770228	0.0399286	17.4877	BnaC03g34940D;BnaA03g29700D
GO0045240	dihydrolipoyl dehydrogenase complex	2	490	13	47438	0.00770228	0.0399286	17.4877	BnaC03g34940D;BnaA03g29700D
GO0048366	leaf development	22	490	1181	47438	0.00802266	0.041463	1.85718	BnaC08g21320D;BnaA03g00260D;BnaC03g00160D;BnaC04g07760D;BnaC09g34350D;BnaA03g26220D;BnaC05g14940D;BnaC03g73200D;BnaC03g04830D;BnaC02g15270D;BnaAnng26200D;BnaC01g26220D;BnaA03g03400D;BnaCnng37560D;BnaC04g53030D;BnaC06g34480D;BnaA10g12140D;BnaC01g23810D;BnaC02g39630D;BnaA05g03420D;BnaA02g10970D;BnaC03g45280D
GO0016209	antioxidant activity	10	490	391	47438	0.00803025	0.041463	2.54631	BnaA08g06260D;BnaAnng04520D;BnaC07g15270D;BnaA06g13760D;BnaC07g43770D;BnaA05g33880D;BnaC08g06690D;BnaC06g32660D;BnaC05g27530D;BnaC05g15180D
GO1903506	regulation of nucleic acid-templated transcription	51	490	6916	47438	0.00818531	0.0420959	0.678305	BnaA05g12950D;BnaA06g02010D;BnaC05g31460D;BnaC01g01940D;BnaC04g07710D;BnaCnng27210D;BnaC03g52080D;BnaC05g38410D;BnaC04g07760D;BnaAnng23990D;BnaC08g31770D;BnaC04g50970D;BnaC06g05930D;BnaA05g01190D;BnaA08g18790D;BnaA06g21470D;BnaAnng01320D;BnaA06g13250D;BnaC06g05090D;BnaA01g26030D;BnaC03g58080D;BnaC03g52390D;BnaC05g14810D;BnaC03g39000D;BnaC06g38360D;BnaC08g26910D;BnaA08g17540D;BnaAnng26200D;BnaCnng…
GO2001141	regulation of RNA biosynthetic process	51	490	6916	47438	0.00818531	0.0420959	0.678305	BnaA05g12950D;BnaA06g02010D;BnaC05g31460D;BnaC01g01940D;BnaC04g07710D;BnaCnng27210D;BnaC03g52080D;BnaC05g38410D;BnaC04g07760D;BnaAnng23990D;BnaC08g31770D;BnaC04g50970D;BnaC06g05930D;BnaA05g01190D;BnaA08g18790D;BnaA06g21470D;BnaAnng01320D;BnaA06g13250D;BnaC06g05090D;BnaA01g26030D;BnaC03g58080D;BnaC03g52390D;BnaC05g14810D;BnaC03g39000D;BnaC06g38360D;BnaC08g26910D;BnaA08g17540D;BnaAnng26200D;BnaCnng…
GO0016143	S-glycoside metabolic process	9	490	333	47438	0.00828892	0.0423765	2.69254	BnaC01g01500D;BnaC07g26280D;BnaC01g01490D;BnaC08g30370D;BnaC02g38400D;BnaA09g55500D;BnaC04g22420D;BnaC01g41470D;BnaA06g30390D
GO0019757	glycosinolate metabolic process	9	490	333	47438	0.00828892	0.0423765	2.69254	BnaC01g01500D;BnaC07g26280D;BnaC01g01490D;BnaC08g30370D;BnaC02g38400D;BnaA09g55500D;BnaC04g22420D;BnaC01g41470D;BnaA06g30390D
GO0019760	glucosinolate metabolic process	9	490	333	47438	0.00828892	0.0423765	2.69254	BnaC01g01500D;BnaC07g26280D;BnaC01g01490D;BnaC08g30370D;BnaC02g38400D;BnaA09g55500D;BnaC04g22420D;BnaC01g41470D;BnaA06g30390D
GO0072511	divalent inorganic cation transport	11	490	455	47438	0.00833817	0.0425444	2.40527	BnaA08g06260D;BnaAnng04520D;BnaA04g21850D;BnaC04g51630D;BnaA10g18740D;BnaA06g01060D;BnaC08g06690D;BnaC03g27400D;BnaA05g14600D;BnaC05g27530D;BnaC04g45720D
GO0016072	rRNA metabolic process	1	490	719	47438	0.00838204	0.0426842	0.131671	BnaA04g07260D
GO0015833	peptide transport	8	490	1788	47438	0.00841173	0.0427514	0.421166	BnaC08g28550D;BnaAnng13010D;BnaC07g48820D;BnaA05g05010D;BnaC03g08040D;BnaA01g11390D;BnaC08g24040D;BnaA09g33230D
GO0051093	negative regulation of developmental process	1	490	730	47438	0.00850382	0.0431348	0.129653	BnaA07g33240D
GO0051301	cell division	1	490	731	47438	0.00852052	0.0431351	0.129473	BnaC04g07760D
GO0051276	chromosome organization	7	490	1639	47438	0.00877942	0.0443384	0.402423	BnaC05g31460D;BnaC04g07710D;BnaCnng27210D;BnaCnng63660D;BnaA05g21090D;BnaC05g33960D;BnaA05g20100D
GO0010558	negative regulation of macromolecule biosynthetic process	24	490	1339	47438	0.00879242	0.0443384	1.78722	BnaA06g38950D;BnaC02g09390D;BnaC04g07710D;BnaCnng27210D;BnaC05g38410D;BnaC04g07760D;BnaAnng23990D;BnaA10g14100D;BnaA08g18790D;BnaA06g13250D;BnaA01g26030D;BnaC03g58080D;BnaC05g14810D;BnaC03g39000D;BnaA08g17540D;BnaC08g37780D;BnaA02g05510D;BnaA08g23150D;BnaC08g36840D;BnaC02g26030D;BnaA09g44300D;BnaA02g15990D;BnaC06g19560D;BnaC05g21480D
GO0004553	hydrolase activity, hydrolyzing O-glycosyl compounds	16	490	749	47438	0.00898432	0.0452181	2.12824	BnaC04g15750D;BnaC03g47100D;BnaC04g25500D;BnaCnng07500D;BnaC02g13250D;BnaC08g26260D;BnaA04g03610D;BnaC04g22390D;BnaA07g17230D;BnaC08g30370D;BnaCnng30450D;BnaA03g22360D;BnaA09g55500D;BnaA01g34980D;BnaC04g22420D;BnaA02g09200D
GO0004518	nuclease activity	6	490	1502	47438	0.00904583	0.0454395	0.376641	BnaA06g38950D;BnaC02g09390D;BnaA10g14100D;BnaA02g05510D;BnaA06g33900D;BnaA04g07260D
GO0010876	lipid localization	10	490	400	47438	0.00932703	0.0466953	2.48707	BnaC07g11810D;BnaA07g08700D;BnaC04g45790D;BnaA08g18690D;BnaC03g36390D;BnaA09g32110D;BnaA04g22080D;BnaC04g06760D;BnaA09g27660D;BnaC04g45800D
GO0044283	small molecule biosynthetic process	31	490	1853	47438	0.00933185	0.0466953	1.67274	BnaA10g18700D;BnaC08g28550D;BnaA04g17560D;BnaAnng10090D;BnaCnng37100D;BnaA01g03680D;BnaA05g10480D;BnaA06g24600D;BnaA05g05760D;BnaC01g05030D;BnaA03g50170D;BnaC01g00680D;BnaC02g13860D;BnaC05g06260D;BnaC02g44850D;BnaA05g33880D;BnaC04g41120D;BnaC07g18010D;BnaA07g35920D;BnaA09g53100D;BnaC04g28590D;BnaC07g42640D;BnaA03g15290D;BnaC04g05620D;BnaA06g36140D;BnaC07g18960D;BnaC04g11470D;BnaCnng72260D;BnaC09g…
GO0009960	endosperm development	5	490	125	47438	0.00982498	0.0490681	4.02302	BnaC08g13910D;BnaC06g38200D;BnaA06g00850D;BnaC06g06420D;BnaA07g33590D
GO0009627	systemic acquired resistance	6	490	175	47438	0.00999404	0.0493976	3.43139	BnaC03g59270D;BnaA05g33880D;BnaC04g53030D;BnaCnng30450D;BnaA05g03420D;BnaC03g45280D
GO0006063	uronic acid metabolic process	2	490	15	47438	0.0102281	0.0493976	14.7967	BnaA03g50170D;BnaC07g42640D
GO0006598	polyamine catabolic process	2	490	15	47438	0.0102281	0.0493976	14.7967	BnaC03g06000D;BnaA03g04460D
GO0009445	putrescine metabolic process	2	490	15	47438	0.0102281	0.0493976	14.7967	BnaC03g28300D;BnaA03g23800D
GO0009446	putrescine biosynthetic process	2	490	15	47438	0.0102281	0.0493976	14.7967	BnaC03g28300D;BnaA03g23800D
GO0010271	regulation of chlorophyll catabolic process	2	490	15	47438	0.0102281	0.0493976	14.7967	BnaA03g24900D;BnaC03g72930D
GO0019586	galacturonate metabolic process	2	490	15	47438	0.0102281	0.0493976	14.7967	BnaA03g50170D;BnaC07g42640D
GO0031420	alkali metal ion binding	2	490	15	47438	0.0102281	0.0493976	14.7967	BnaCnng37100D;BnaC02g44850D
GO0046398	UDP-glucuronate metabolic process	2	490	15	47438	0.0102281	0.0493976	14.7967	BnaA10g18700D;BnaC09g42430D
GO0046459	short-chain fatty acid metabolic process	2	490	15	47438	0.0102281	0.0493976	14.7967	BnaA09g32380D;BnaC04g28570D
GO0046592	polyamine oxidase activity	2	490	15	47438	0.0102281	0.0493976	14.7967	BnaC03g06000D;BnaA03g04460D
GO1901404	regulation of tetrapyrrole catabolic process	2	490	15	47438	0.0102281	0.0493976	14.7967	BnaA03g24900D;BnaC03g72930D
GO0098869	cellular oxidant detoxification	10	490	406	47438	0.0102766	0.0493976	2.44907	BnaA08g06260D;BnaAnng04520D;BnaC07g15270D;BnaA06g13760D;BnaC07g43770D;BnaA05g33880D;BnaC08g06690D;BnaC06g32660D;BnaC05g27530D;BnaC05g15180D
GO0003853	2-methylacyl-CoA dehydrogenase activity	1	490	1	47438	0.0103293	0.0493976	inf	BnaA06g38800D
GO0008470	isovaleryl-CoA dehydrogenase activity	1	490	1	47438	0.0103293	0.0493976	inf	BnaA06g38800D
GO0036115	fatty-acyl-CoA catabolic process	1	490	1	47438	0.0103293	0.0493976	inf	BnaA06g38800D
GO1901569	fatty acid derivative catabolic process	1	490	1	47438	0.0103293	0.0493976	inf	BnaA06g38800D
GO1902189	2-methylbutanoyl-CoA(4-) metabolic process	1	490	1	47438	0.0103293	0.0493976	inf	BnaA06g38800D
GO1902190	2-methylbutanoyl-CoA(4-) catabolic process	1	490	1	47438	0.0103293	0.0493976	inf	BnaA06g38800D
GO1902192	2-methylbut-2-enoyl-CoA(4-) metabolic process	1	490	1	47438	0.0103293	0.0493976	inf	BnaA06g38800D
GO1902195	isovaleryl-CoA(4-) metabolic process	1	490	1	47438	0.0103293	0.0493976	inf	BnaA06g38800D
GO1902196	isovaleryl-CoA(4-) catabolic process	1	490	1	47438	0.0103293	0.0493976	inf	BnaA06g38800D
GO1902198	3-methylbut-2-enoyl-CoA(4-) metabolic process	1	490	1	47438	0.0103293	0.0493976	inf	BnaA06g38800D
GO0032259	methylation	2	490	873	47438	0.0104321	0.0497438	0.216808	BnaC05g31460D;BnaA05g20100D
GO0042743	hydrogen peroxide metabolic process	4	490	82	47438	0.0104401	0.0497438	4.94566	BnaC07g15270D;BnaA06g13760D;BnaC07g43770D;BnaC05g15180D
GO0016310	phosphorylation	21	490	3412	47438	0.0105151	0.0500093	0.575144	BnaAnng34010D;BnaC08g28550D;BnaA05g29500D;BnaC08g13910D;BnaCnng37100D;BnaC01g03320D;BnaA06g15030D;BnaA02g31990D;BnaA01g06180D;BnaC03g67810D;BnaC02g40580D;BnaC01g28850D;BnaC01g07450D;BnaC08g48860D;BnaA03g11410D;BnaC02g44850D;BnaA06g18440D;BnaA08g12770D;BnaC05g43850D;BnaC01g06260D;BnaC04g43980D
GO0051213	dioxygenase activity	8	490	288	47438	0.0106899	0.0507478	2.76633	BnaC05g31460D;BnaA06g00850D;BnaA05g33880D;BnaC02g13840D;BnaA02g09890D;BnaC06g06420D;BnaC06g34480D;BnaA05g20100D
GO0006638	neutral lipid metabolic process	6	490	179	47438	0.0110848	0.0524304	3.35177	BnaC03g19520D;BnaC06g12160D;BnaA03g16250D;BnaA05g12980D;BnaC07g23920D;BnaA06g32640D
GO0006639	acylglycerol metabolic process	6	490	179	47438	0.0110848	0.0524304	3.35177	BnaC03g19520D;BnaC06g12160D;BnaA03g16250D;BnaA05g12980D;BnaC07g23920D;BnaA06g32640D
GO0016620	oxidoreductase activity, acting on the aldehyde or oxo group of donors, NAD or NADP as acceptor	5	490	129	47438	0.011154	0.0526617	3.89292	BnaA05g05760D;BnaA08g00900D;BnaCnng47950D;BnaC03g78230D;BnaC04g05620D
GO0004672	protein kinase activity	14	490	2541	47438	0.0112631	0.0529353	0.517016	BnaA05g29500D;BnaC08g13910D;BnaC01g03320D;BnaA06g15030D;BnaA01g06180D;BnaC03g67810D;BnaC01g28850D;BnaC01g07450D;BnaC08g48860D;BnaA06g18440D;BnaA08g12770D;BnaC05g43850D;BnaC01g06260D;BnaC04g43980D
GO0015081	sodium ion transmembrane transporter activity	3	490	45	47438	0.0112733	0.0529353	6.87973	BnaA06g01060D;BnaA05g14600D;BnaC02g39630D
GO0035725	sodium ion transmembrane transport	3	490	45	47438	0.0112733	0.0529353	6.87973	BnaA06g01060D;BnaA05g14600D;BnaC02g39630D
GO0030170	pyridoxal phosphate binding	4	490	84	47438	0.0113342	0.0530295	4.82181	BnaA09g53100D;BnaA06g36140D;BnaC07g18960D;BnaC03g45280D
GO0070279	vitamin B6 binding	4	490	84	47438	0.0113342	0.0530295	4.82181	BnaA09g53100D;BnaA06g36140D;BnaC07g18960D;BnaC03g45280D
GO0000166	nucleotide binding	23	490	1293	47438	0.0114696	0.0534513	1.77139	BnaA01g36810D;BnaA08g06260D;BnaAnng04520D;BnaA03g17400D;BnaC04g00160D;BnaC04g53560D;BnaC04g53550D;BnaAnng13010D;BnaAnng19740D;BnaC03g72040D;BnaC03g06000D;BnaC04g53580D;BnaAnng30320D;BnaA05g34880D;BnaA03g04460D;BnaC08g06690D;BnaAnng13720D;BnaC02g10080D;BnaC05g27530D;BnaC01g32420D;BnaC03g73550D;BnaA05g00280D;BnaA06g38800D
GO1901265	nucleoside phosphate binding	23	490	1293	47438	0.0114696	0.0534513	1.77139	BnaA01g36810D;BnaA08g06260D;BnaAnng04520D;BnaA03g17400D;BnaC04g00160D;BnaC04g53560D;BnaC04g53550D;BnaAnng13010D;BnaAnng19740D;BnaC03g72040D;BnaC03g06000D;BnaC04g53580D;BnaAnng30320D;BnaA05g34880D;BnaA03g04460D;BnaC08g06690D;BnaAnng13720D;BnaC02g10080D;BnaC05g27530D;BnaC01g32420D;BnaC03g73550D;BnaA05g00280D;BnaA06g38800D
GO0005247	voltage-gated chloride channel activity	2	490	16	47438	0.01161	0.0534513	13.7395	BnaC06g13300D;BnaA07g15180D
GO0005254	chloride channel activity	2	490	16	47438	0.01161	0.0534513	13.7395	BnaC06g13300D;BnaA07g15180D
GO0009940	amino-terminal vacuolar sorting propeptide binding	2	490	16	47438	0.01161	0.0534513	13.7395	BnaC08g24040D;BnaA09g33230D
GO0010209	vacuolar sorting signal binding	2	490	16	47438	0.01161	0.0534513	13.7395	BnaC08g24040D;BnaA09g33230D
GO0015369	calciumproton antiporter activity	2	490	16	47438	0.01161	0.0534513	13.7395	BnaA04g21850D;BnaC04g45720D
GO0016672	oxidoreductase activity, acting on a sulfur group of donors, quinone or similar compound as acceptor	2	490	16	47438	0.01161	0.0534513	13.7395	BnaA06g13760D;BnaC05g15180D
GO0045174	glutathione dehydrogenase (ascorbate) activity	2	490	16	47438	0.01161	0.0534513	13.7395	BnaA06g13760D;BnaC05g15180D
GO0016567	protein ubiquitination	7	490	1616	47438	0.0116342	0.053468	0.408382	BnaCnng37520D;BnaC07g36050D;BnaC02g48590D;BnaA03g06670D;BnaC01g06260D;BnaC03g08540D;BnaC07g20360D
GO0031226	intrinsic component of plasma membrane	23	490	1297	47438	0.011703	0.0536887	1.76567	BnaC07g11810D;BnaA07g08700D;BnaC09g37560D;BnaC03g47100D;BnaC04g25500D;BnaCnng07500D;BnaC01g20120D;BnaC02g13250D;BnaA09g05190D;BnaA10g18740D;BnaC08g26260D;BnaA04g03610D;BnaC04g22390D;BnaA08g18690D;BnaC09g42490D;BnaA10g15190D;BnaC07g50320D;BnaA01g16530D;BnaA07g17230D;BnaA06g23230D;BnaA03g22360D;BnaA09g27660D;BnaA02g09200D
GO0016896	exoribonuclease activity, producing 5'-phosphomonoesters	4	490	85	47438	0.0117992	0.0539393	4.76218	BnaA06g38950D;BnaC02g09390D;BnaA10g14100D;BnaA02g05510D
GO1901681	sulfur compound binding	4	490	85	47438	0.0117992	0.0539393	4.76218	BnaA06g11500D;BnaA06g13760D;BnaC05g15180D;BnaC08g37940D
GO0044085	cellular component biogenesis	27	490	4073	47438	0.0119084	0.0543423	0.61835	BnaC08g21320D;BnaAnng34010D;BnaAnng10090D;BnaC01g15760D;BnaA08g28620D;BnaC03g16140D;BnaC05g14940D;BnaC04g25500D;BnaA02g31990D;BnaA09g05190D;BnaA06g09900D;BnaC02g40580D;BnaC08g26260D;BnaA04g03610D;BnaC09g27270D;BnaAnng14080D;BnaC06g38360D;BnaC07g18010D;BnaA01g13540D;BnaC01g26220D;BnaA09g53100D;BnaC02g10080D;BnaCnng63660D;BnaA06g21560D;BnaA05g21090D;BnaC05g33960D;BnaA02g13370D
GO0051241	negative regulation of multicellular organismal process	1	490	675	47438	0.0119502	0.0544376	0.1404	BnaA07g33240D
GO0006518	peptide metabolic process	6	490	1453	47438	0.0119801	0.0544585	0.389815	BnaA06g11500D;BnaA06g13760D;BnaA09g29060D;BnaC05g15180D;BnaC01g41470D;BnaC08g37940D
GO0019953	sexual reproduction	1	490	683	47438	0.0119992	0.0544585	0.138729	BnaC03g12400D
GO0016043	cellular component organization	65	490	8327	47438	0.0120327	0.0544585	0.716132	BnaA10g18700D;BnaCnng37520D;BnaC08g21320D;BnaAnng34010D;BnaAnng23050D;BnaC05g31460D;BnaC04g07710D;BnaCnng27210D;BnaA01g04780D;BnaC09g34350D;BnaA03g24720D;BnaA07g18900D;BnaC08g13040D;BnaA05g10480D;BnaA08g28620D;BnaC03g16140D;BnaC05g14940D;BnaC03g67980D;BnaA02g35330D;BnaCnng33690D;BnaC04g25500D;BnaA02g31990D;BnaA09g05190D;BnaA06g09900D;BnaC01g10130D;BnaC02g40580D;BnaA02g22470D;BnaA09g28510D;BnaC08g…
GO0046777	protein autophosphorylation	1	490	686	47438	0.0120389	0.0544585	0.138113	BnaC08g13910D
GO2000241	regulation of reproductive process	5	490	1320	47438	0.0122506	0.0552432	0.357752	BnaA05g12950D;BnaA03g26220D;BnaC03g73200D;BnaA05g05010D;BnaCnng37560D
GO0000291	nuclear-transcribed mRNA catabolic process, exonucleolytic	4	490	86	47438	0.0122763	0.0552432	4.704	BnaA06g38950D;BnaC02g09390D;BnaA10g14100D;BnaA02g05510D
GO0044070	regulation of anion transport	4	490	86	47438	0.0122763	0.0552432	4.704	BnaC05g41830D;BnaAnng23920D;BnaA05g27660D;BnaA01g37370D
GO0016407	acetyltransferase activity	8	490	296	47438	0.0124428	0.0558955	2.68903	BnaC09g20370D;BnaC03g34940D;BnaA09g18440D;BnaA01g29130D;BnaCnng63660D;BnaA05g21090D;BnaC05g33960D;BnaA03g29700D
GO1902679	negative regulation of RNA biosynthetic process	20	490	1065	47438	0.0126693	0.056608	1.8692	BnaC04g07710D;BnaCnng27210D;BnaC05g38410D;BnaC04g07760D;BnaAnng23990D;BnaA08g18790D;BnaA06g13250D;BnaA01g26030D;BnaC03g58080D;BnaC05g14810D;BnaC03g39000D;BnaA08g17540D;BnaC08g37780D;BnaA08g23150D;BnaC08g36840D;BnaC02g26030D;BnaA09g44300D;BnaA02g15990D;BnaC06g19560D;BnaC05g21480D
GO1903507	negative regulation of nucleic acid-templated transcription	20	490	1065	47438	0.0126693	0.056608	1.8692	BnaC04g07710D;BnaCnng27210D;BnaC05g38410D;BnaC04g07760D;BnaAnng23990D;BnaA08g18790D;BnaA06g13250D;BnaA01g26030D;BnaC03g58080D;BnaC05g14810D;BnaC03g39000D;BnaA08g17540D;BnaC08g37780D;BnaA08g23150D;BnaC08g36840D;BnaC02g26030D;BnaA09g44300D;BnaA02g15990D;BnaC06g19560D;BnaC05g21480D
GO0009269	response to desiccation	3	490	47	47438	0.0126887	0.056608	6.56674	BnaA08g00900D;BnaCnng63310D;BnaC03g78230D
GO0051176	positive regulation of sulfur metabolic process	3	490	47	47438	0.0126887	0.056608	6.56674	BnaAnng14080D;BnaAnng26200D;BnaA02g13370D
GO0005310	dicarboxylic acid transmembrane transporter activity	4	490	87	47438	0.0127655	0.0567549	4.64723	BnaC02g33350D;BnaC07g20310D;BnaC04g18440D;BnaA02g25550D
GO1902074	response to salt	4	490	87	47438	0.0127655	0.0567549	4.64723	BnaA03g26220D;BnaC03g73200D;BnaC02g15270D;BnaA02g10970D
GO0016798	hydrolase activity, acting on glycosyl bonds	16	490	809	47438	0.0129112	0.0573043	1.96466	BnaC04g15750D;BnaC03g47100D;BnaC04g25500D;BnaCnng07500D;BnaC02g13250D;BnaC08g26260D;BnaA04g03610D;BnaC04g22390D;BnaA07g17230D;BnaC08g30370D;BnaCnng30450D;BnaA03g22360D;BnaA09g55500D;BnaA01g34980D;BnaC04g22420D;BnaA02g09200D
GO0006089	lactate metabolic process	2	490	17	47438	0.0130688	0.0577077	12.8232	BnaAnng19740D;BnaC04g28590D
GO0006208	pyrimidine nucleobase catabolic process	2	490	17	47438	0.0130688	0.0577077	12.8232	BnaC01g34640D;BnaA01g27800D
GO0006212	uracil catabolic process	2	490	17	47438	0.0130688	0.0577077	12.8232	BnaC01g34640D;BnaA01g27800D
GO1901615	organic hydroxy compound metabolic process	16	490	811	47438	0.0131103	0.0577924	1.95963	BnaC07g35800D;BnaC03g24530D;BnaAnng19740D;BnaC07g23920D;BnaCnng33690D;BnaC01g00680D;BnaC02g13860D;BnaC05g13120D;BnaA05g33880D;BnaA06g32640D;BnaC02g13840D;BnaA02g09890D;BnaC04g28590D;BnaC01g23810D;BnaA01g24820D;BnaA02g09960D
GO0004532	exoribonuclease activity	4	490	89	47438	0.0137808	0.0605421	4.53769	BnaA06g38950D;BnaC02g09390D;BnaA10g14100D;BnaA02g05510D
GO0009067	aspartate family amino acid biosynthetic process	4	490	89	47438	0.0137808	0.0605421	4.53769	BnaA01g03680D;BnaC01g05030D;BnaA09g53100D;BnaCnng72260D
GO1901607	alpha-amino acid biosynthetic process	10	490	426	47438	0.0139793	0.06131	2.33033	BnaA01g03680D;BnaA05g05760D;BnaC01g05030D;BnaC05g06260D;BnaA07g35920D;BnaA09g53100D;BnaC04g05620D;BnaA06g36140D;BnaC07g18960D;BnaCnng72260D
GO0009755	hormone-mediated signaling pathway	31	490	1898	47438	0.0141353	0.0618899	1.63079	BnaA07g24330D;BnaA03g13650D;BnaC05g41830D;BnaC05g38410D;BnaAnng23920D;BnaA05g27660D;BnaC01g03320D;BnaA07g30430D;BnaC04g40810D;BnaA03g13640D;BnaA04g17200D;BnaA01g37370D;BnaA06g13250D;BnaA05g02510D;BnaC05g14810D;BnaC03g39000D;BnaC06g38360D;BnaC06g33910D;BnaC04g02270D;BnaA05g12330D;BnaC06g25430D;BnaC03g16540D;BnaA06g18440D;BnaC08g36840D;BnaCnng37560D;BnaC01g23810D;BnaC04g14780D;BnaC01g06260D;BnaC03g…
GO0040007	growth	26	490	1538	47438	0.0142248	0.0621764	1.68385	BnaCnng37520D;BnaC08g21320D;BnaA04g17560D;BnaC09g40960D;BnaCnng33690D;BnaC01g10130D;BnaA08g18790D;BnaA09g28510D;BnaC04g45790D;BnaC03g58080D;BnaC04g41120D;BnaAnng26200D;BnaC01g26220D;BnaC06g01490D;BnaA06g04140D;BnaA09g32110D;BnaC01g23810D;BnaA04g22080D;BnaC01g06260D;BnaA04g25550D;BnaA01g24820D;BnaC04g06760D;BnaC05g21480D;BnaC05g26170D;BnaC04g45800D;BnaA05g16130D
GO0015031	protein transport	8	490	1703	47438	0.0143121	0.062453	0.443119	BnaC08g28550D;BnaAnng13010D;BnaC07g48820D;BnaA05g05010D;BnaC03g08040D;BnaA01g11390D;BnaC08g24040D;BnaA09g33230D
GO0051172	negative regulation of nitrogen compound metabolic process	31	490	1906	47438	0.01438	0.0626435	1.62354	BnaA06g38950D;BnaC02g09390D;BnaC04g07710D;BnaCnng27210D;BnaC05g38410D;BnaC04g07760D;BnaC07g36050D;BnaAnng23990D;BnaA10g11080D;BnaAnng20740D;BnaA03g24900D;BnaC03g72930D;BnaA10g14100D;BnaCnng62150D;BnaA08g18790D;BnaC09g53650D;BnaA06g13250D;BnaA01g26030D;BnaC03g58080D;BnaC05g14810D;BnaC03g39000D;BnaA08g17540D;BnaC08g37780D;BnaA02g05510D;BnaA08g23150D;BnaC08g36840D;BnaC02g26030D;BnaA09g44300D;BnaA02g…
GO0010015	root morphogenesis	2	490	830	47438	0.014525	0.0627706	0.228281	BnaC09g40960D;BnaCnng37560D
GO0045184	establishment of protein localization	8	490	1731	47438	0.0145751	0.0627706	0.435649	BnaC08g28550D;BnaAnng13010D;BnaC07g48820D;BnaA05g05010D;BnaC03g08040D;BnaA01g11390D;BnaC08g24040D;BnaA09g33230D
GO1903047	mitotic cell cycle process	2	490	838	47438	0.0146022	0.0627706	0.226057	BnaC05g31460D;BnaA05g20100D
GO0015513	high-affinity secondary active nitrite transmembrane transporter activity	2	490	18	47438	0.0146029	0.0627706	12.0215	BnaC06g13300D;BnaA07g15180D
GO0019322	pentose biosynthetic process	2	490	18	47438	0.0146029	0.0627706	12.0215	BnaAnng10090D;BnaC07g18010D
GO0019566	arabinose metabolic process	2	490	18	47438	0.0146029	0.0627706	12.0215	BnaAnng10090D;BnaC07g18010D
GO0019567	arabinose biosynthetic process	2	490	18	47438	0.0146029	0.0627706	12.0215	BnaAnng10090D;BnaC07g18010D
GO0050373	UDP-arabinose 4-epimerase activity	2	490	18	47438	0.0146029	0.0627706	12.0215	BnaAnng10090D;BnaC07g18010D
GO1990748	cellular detoxification	10	490	430	47438	0.0148262	0.0636047	2.30794	BnaA08g06260D;BnaAnng04520D;BnaC07g15270D;BnaA06g13760D;BnaC07g43770D;BnaA05g33880D;BnaC08g06690D;BnaC06g32660D;BnaC05g27530D;BnaC05g15180D
GO0090503	RNA phosphodiester bond hydrolysis, exonucleolytic	4	490	91	47438	0.014846	0.0636047	4.43319	BnaA06g38950D;BnaC02g09390D;BnaA10g14100D;BnaA02g05510D
GO0006882	cellular zinc ion homeostasis	3	490	50	47438	0.0149942	0.064055	6.14719	BnaA04g21850D;BnaC04g51630D;BnaC04g45720D
GO0046364	monosaccharide biosynthetic process	5	490	139	47438	0.0150005	0.064055	3.60163	BnaAnng10090D;BnaA06g24600D;BnaA03g50170D;BnaC07g18010D;BnaC07g42640D
GO0019787	ubiquitin-like protein transferase activity	7	490	1573	47438	0.0152323	0.0649377	0.419994	BnaCnng37520D;BnaC07g36050D;BnaC02g48590D;BnaA03g06670D;BnaC01g06260D;BnaC03g08540D;BnaC07g20360D
GO0006811	ion transport	42	490	2787	47438	0.015282	0.0650425	1.50967	BnaA03g00260D;BnaA09g09830D;BnaC03g00160D;BnaA08g06260D;BnaAnng04520D;BnaC09g37560D;BnaC03g52730D;BnaC06g13300D;BnaCnng56610D;BnaC02g33350D;BnaC08g13040D;BnaA04g21850D;BnaCnng57580D;BnaA09g52260D;BnaC04g51630D;BnaA10g18740D;BnaC07g28040D;BnaC04g45790D;BnaA03g11410D;BnaA10g15190D;BnaC07g20310D;BnaA03g33540D;BnaA07g35920D;BnaCnng44750D;BnaA06g01060D;BnaA07g28390D;BnaA10g16170D;BnaA09g34030D;BnaC08g…
GO0031668	cellular response to extracellular stimulus	17	490	864	47438	0.0154001	0.0654378	1.95621	BnaCnng37450D;BnaC07g15270D;BnaA06g24600D;BnaA03g26220D;BnaC03g73200D;BnaA07g38000D;BnaC03g34940D;BnaCnng63310D;BnaA07g03740D;BnaA06g33900D;BnaA09g53100D;BnaC01g34640D;BnaA06g15780D;BnaA05g30920D;BnaA03g29700D;BnaCnng72260D;BnaA01g27800D
GO0031327	negative regulation of cellular biosynthetic process	24	490	1406	47438	0.0156085	0.0662148	1.69808	BnaA06g38950D;BnaC02g09390D;BnaC04g07710D;BnaCnng27210D;BnaC05g38410D;BnaC04g07760D;BnaAnng23990D;BnaA10g14100D;BnaA08g18790D;BnaA06g13250D;BnaA01g26030D;BnaC03g58080D;BnaC05g14810D;BnaC03g39000D;BnaA08g17540D;BnaC08g37780D;BnaA02g05510D;BnaA08g23150D;BnaC08g36840D;BnaC02g26030D;BnaA09g44300D;BnaA02g15990D;BnaC06g19560D;BnaC05g21480D
GO0008289	lipid binding	12	490	547	47438	0.0156502	0.0662834	2.17791	BnaC07g11810D;BnaC02g45160D;BnaA07g08700D;BnaC07g48820D;BnaC05g15780D;BnaA07g11450D;BnaA08g18690D;BnaC09g08130D;BnaC07g15380D;BnaA09g27660D;BnaA09g07980D;BnaCnng27850D
GO0005996	monosaccharide metabolic process	8	490	309	47438	0.0157281	0.0665045	2.57217	BnaAnng10090D;BnaA06g13760D;BnaA06g24600D;BnaA03g50170D;BnaCnng63310D;BnaC07g18010D;BnaC07g42640D;BnaC05g15180D
GO0007031	peroxisome organization	5	490	141	47438	0.0158638	0.0669692	3.54851	BnaA07g18900D;BnaA05g10480D;BnaA03g15290D;BnaC04g11470D;BnaCnng13410D
GO0006835	dicarboxylic acid transport	4	490	93	47438	0.0159618	0.0672731	4.33338	BnaC02g33350D;BnaC07g20310D;BnaC04g18440D;BnaA02g25550D
GO0006812	cation transport	27	490	1610	47438	0.0161141	0.0674439	1.67118	BnaA03g00260D;BnaA09g09830D;BnaC03g00160D;BnaA08g06260D;BnaAnng04520D;BnaC09g37560D;BnaC06g13300D;BnaA04g21850D;BnaCnng57580D;BnaC04g51630D;BnaA10g18740D;BnaA03g11410D;BnaA10g15190D;BnaA07g35920D;BnaCnng44750D;BnaA06g01060D;BnaA10g16170D;BnaA09g34030D;BnaC08g06690D;BnaC03g27400D;BnaA05g14600D;BnaAnng11680D;BnaC02g39630D;BnaC04g18440D;BnaC05g27530D;BnaA07g15180D;BnaC04g45720D
GO0070727	cellular macromolecule localization	10	490	1973	47438	0.0161738	0.0674439	0.477426	BnaC04g07710D;BnaAnng13010D;BnaC07g48820D;BnaC06g38360D;BnaA05g05010D;BnaC03g08040D;BnaA01g11390D;BnaC08g24040D;BnaC01g41470D;BnaA09g33230D
GO0006023	aminoglycan biosynthetic process	2	490	19	47438	0.0162105	0.0674439	11.3141	BnaA10g18700D;BnaC09g42430D
GO0006024	glycosaminoglycan biosynthetic process	2	490	19	47438	0.0162105	0.0674439	11.3141	BnaA10g18700D;BnaC09g42430D
GO0009068	aspartate family amino acid catabolic process	2	490	19	47438	0.0162105	0.0674439	11.3141	BnaC05g06260D;BnaA09g53100D
GO0010452	histone H3-K36 methylation	2	490	19	47438	0.0162105	0.0674439	11.3141	BnaC05g31460D;BnaA05g20100D
GO0016813	hydrolase activity, acting on carbon-nitrogen (but not peptide) bonds, in linear amidines	2	490	19	47438	0.0162105	0.0674439	11.3141	BnaC03g28300D;BnaA03g23800D
GO0043937	regulation of sporulation	2	490	19	47438	0.0162105	0.0674439	11.3141	BnaC08g24280D;BnaA09g33460D
GO0046916	cellular transition metal ion homeostasis	8	490	312	47438	0.0165676	0.0688194	2.54663	BnaA03g00260D;BnaA05g29010D;BnaC03g00160D;BnaC05g43490D;BnaA04g21850D;BnaC04g51630D;BnaAnng11680D;BnaC04g45720D
GO0020037	heme binding	3	490	52	47438	0.0166538	0.0690666	5.89603	BnaA09g27040D;BnaC07g15270D;BnaA04g29550D
GO0045229	external encapsulating structure organization	17	490	887	47438	0.0168167	0.0696306	1.90354	BnaA10g18700D;BnaC08g21320D;BnaAnng23050D;BnaC05g14940D;BnaC03g67980D;BnaA02g35330D;BnaC04g25500D;BnaA02g22470D;BnaC08g26260D;BnaA04g03610D;BnaC06g38360D;BnaC01g26220D;BnaC06g32660D;BnaA02g23870D;BnaC09g42430D;BnaC01g41470D;BnaA02g35250D
GO0015297	antiporter activity	6	490	197	47438	0.0170448	0.0703702	3.03472	BnaC08g13040D;BnaA04g21850D;BnaA06g01060D;BnaA05g14600D;BnaC02g39630D;BnaC04g45720D
GO0010941	regulation of cell death	1	490	637	47438	0.0170496	0.0703702	0.148911	BnaC07g36050D
GO0071496	cellular response to external stimulus	17	490	899	47438	0.0178285	0.0733713	1.87715	BnaCnng37450D;BnaC07g15270D;BnaA06g24600D;BnaA03g26220D;BnaC03g73200D;BnaA07g38000D;BnaC03g34940D;BnaCnng63310D;BnaA07g03740D;BnaA06g33900D;BnaA09g53100D;BnaC01g34640D;BnaA06g15780D;BnaA05g30920D;BnaA03g29700D;BnaCnng72260D;BnaA01g27800D
GO0010189	vitamin E biosynthetic process	2	490	20	47438	0.0178899	0.0733713	10.6853	BnaC02g13860D;BnaA02g09960D
GO0042360	vitamin E metabolic process	2	490	20	47438	0.0178899	0.0733713	10.6853	BnaC02g13860D;BnaA02g09960D
GO0051195	obsolete negative regulation of cofactor metabolic process	2	490	20	47438	0.0178899	0.0733713	10.6853	BnaA03g24900D;BnaC03g72930D
GO0006873	cellular ion homeostasis	12	490	563	47438	0.0179467	0.0734881	2.11394	BnaA03g00260D;BnaA05g29010D;BnaC03g00160D;BnaC05g43490D;BnaC02g33350D;BnaA04g21850D;BnaC04g51630D;BnaC07g20310D;BnaAnng11680D;BnaC02g39630D;BnaA02g25550D;BnaC04g45720D
GO0015914	phospholipid transport	4	490	97	47438	0.0183479	0.0750123	4.14664	BnaC04g45790D;BnaA04g22080D;BnaC04g06760D;BnaC04g45800D
GO0009828	plant-type cell wall loosening	3	490	54	47438	0.0184121	0.0751561	5.66457	BnaAnng23050D;BnaC03g67980D;BnaA02g22470D
GO0030001	metal ion transport	17	490	907	47438	0.0186097	0.0758434	1.85996	BnaA03g00260D;BnaC03g00160D;BnaA08g06260D;BnaAnng04520D;BnaC09g37560D;BnaA04g21850D;BnaC04g51630D;BnaA10g18740D;BnaA10g15190D;BnaA06g01060D;BnaC08g06690D;BnaC03g27400D;BnaA05g14600D;BnaAnng11680D;BnaC02g39630D;BnaC05g27530D;BnaC04g45720D
GO0032870	cellular response to hormone stimulus	35	490	2273	47438	0.0188873	0.0767931	1.53674	BnaA07g24330D;BnaA03g13650D;BnaC05g41830D;BnaC05g38410D;BnaAnng23920D;BnaA05g27660D;BnaC01g03320D;BnaA07g30430D;BnaC04g40810D;BnaA03g13640D;BnaA04g17200D;BnaA01g37370D;BnaA06g13250D;BnaA05g02510D;BnaC05g14810D;BnaA05g33880D;BnaC06g17590D;BnaC03g39000D;BnaC06g38360D;BnaC06g33910D;BnaC04g02270D;BnaA05g12330D;BnaC06g25430D;BnaC03g16540D;BnaA06g18440D;BnaC08g36840D;BnaCnng37560D;BnaC01g23810D;BnaC04g…
GO0009991	response to extracellular stimulus	19	490	1048	47438	0.018902	0.0767931	1.80015	BnaCnng37450D;BnaC07g15270D;BnaA06g24600D;BnaA03g26220D;BnaC03g73200D;BnaA07g38000D;BnaC03g34940D;BnaCnng63310D;BnaC04g22390D;BnaA03g60000D;BnaA07g03740D;BnaA06g33900D;BnaA09g53100D;BnaC01g34640D;BnaA06g15780D;BnaA05g30920D;BnaA03g29700D;BnaCnng72260D;BnaA01g27800D
GO1902600	proton transmembrane transport	11	490	488	47438	0.0196357	0.0789236	2.23728	BnaA09g09830D;BnaC06g13300D;BnaA04g21850D;BnaCnng57580D;BnaA03g11410D;BnaCnng44750D;BnaA10g16170D;BnaA09g34030D;BnaC02g39630D;BnaA07g15180D;BnaC04g45720D
GO0003997	acyl-CoA oxidase activity	2	490	21	47438	0.0196395	0.0789236	10.1227	BnaA09g32380D;BnaC04g28570D
GO0008113	peptide-methionine (S)-S-oxide reductase activity	2	490	21	47438	0.0196395	0.0789236	10.1227	BnaA03g02070D;BnaA03g02060D
GO0010731	protein glutathionylation	2	490	21	47438	0.0196395	0.0789236	10.1227	BnaA06g13760D;BnaC05g15180D
GO0015108	chloride transmembrane transporter activity	2	490	21	47438	0.0196395	0.0789236	10.1227	BnaC06g13300D;BnaA07g15180D
GO0019860	uracil metabolic process	2	490	21	47438	0.0196395	0.0789236	10.1227	BnaC01g34640D;BnaA01g27800D
GO1902476	chloride transmembrane transport	2	490	21	47438	0.0196395	0.0789236	10.1227	BnaC06g13300D;BnaA07g15180D
GO0004842	ubiquitin-protein transferase activity	7	490	1525	47438	0.0198286	0.0795599	0.433732	BnaCnng37520D;BnaC07g36050D;BnaC02g48590D;BnaA03g06670D;BnaC01g06260D;BnaC03g08540D;BnaC07g20360D
GO0031326	regulation of cellular biosynthetic process	62	490	7830	47438	0.0200142	0.0797469	0.730639	BnaA06g38950D;BnaA05g12950D;BnaA06g02010D;BnaC02g09390D;BnaC09g37560D;BnaC05g31460D;BnaC01g01940D;BnaC04g07710D;BnaCnng27210D;BnaC03g52080D;BnaC05g38410D;BnaC04g07760D;BnaA05g29500D;BnaAnng23990D;BnaC08g31770D;BnaC04g50970D;BnaC06g05930D;BnaA05g01190D;BnaA10g14100D;BnaA08g18790D;BnaA06g21470D;BnaAnng01320D;BnaA06g13250D;BnaC06g05090D;BnaA01g26030D;BnaC03g58080D;BnaC03g52390D;BnaC05g14810D;BnaC03g…
GO0098754	detoxification	12	490	575	47438	0.020021	0.0797469	2.06834	BnaA08g06260D;BnaAnng04520D;BnaA06g11500D;BnaC07g15270D;BnaA06g13760D;BnaC07g43770D;BnaA05g33880D;BnaC08g06690D;BnaC06g32660D;BnaC05g27530D;BnaC05g15180D;BnaC08g37940D
GO0048868	pollen tube development	11	490	492	47438	0.0201439	0.0797469	2.21849	BnaCnng33690D;BnaC01g10130D;BnaC05g11630D;BnaA09g28510D;BnaA06g10010D;BnaC06g01490D;BnaA06g18440D;BnaA06g04140D;BnaA01g24820D;BnaC05g26170D;BnaA05g16130D
GO0006886	intracellular protein transport	7	490	1548	47438	0.0202405	0.0797469	0.427042	BnaAnng13010D;BnaC07g48820D;BnaA05g05010D;BnaC03g08040D;BnaA01g11390D;BnaC08g24040D;BnaA09g33230D
GO0051641	cellular localization	17	490	2803	47438	0.0202518	0.0797469	0.569712	BnaA03g00260D;BnaC03g00160D;BnaC04g07710D;BnaAnng13010D;BnaC01g10130D;BnaC07g48820D;BnaA03g11410D;BnaC06g38360D;BnaA05g05010D;BnaC03g08040D;BnaA01g11390D;BnaC01g06260D;BnaC08g24040D;BnaA06g36140D;BnaC07g18960D;BnaC01g41470D;BnaA09g33230D
GO0043227	membrane-bounded organelle	320	490	28523	47438	0.02032	0.0797469	1.2511	BnaC04g52580D;BnaC03g58870D;BnaA10g18700D;BnaCnng37520D;BnaA09g27040D;BnaA09g13300D;BnaC08g21320D;BnaA03g00260D;BnaA07g24330D;BnaA09g09830D;BnaA01g36810D;BnaC03g00160D;BnaA03g39660D;BnaAnng34010D;BnaA08g06260D;BnaA03g13650D;BnaC07g11810D;BnaC02g45160D;BnaA07g08700D;BnaAnng04520D;BnaCnng37450D;BnaA01g20660D;BnaA03g17400D;BnaA09g40670D;BnaC03g19520D;BnaAnng23050D;BnaC09g37560D;BnaC05g31460D;BnaC01g…
GO0005222	intracellular cAMP-activated cation channel activity	1	490	2	47438	0.0205521	0.0797469	96.0061	BnaA10g18740D
GO0005287	high-affinity basic amino acid transmembrane transporter activity	1	490	2	47438	0.0205521	0.0797469	96.0061	BnaA07g35920D
GO0005289	high-affinity arginine transmembrane transporter activity	1	490	2	47438	0.0205521	0.0797469	96.0061	BnaA07g35920D
GO0005292	high-affinity lysine transmembrane transporter activity	1	490	2	47438	0.0205521	0.0797469	96.0061	BnaA07g35920D
GO0006844	acyl carnitine transport	1	490	2	47438	0.0205521	0.0797469	96.0061	BnaA07g35920D
GO0009087	methionine catabolic process	1	490	2	47438	0.0205521	0.0797469	96.0061	BnaA09g53100D
GO0015227	acyl carnitine transmembrane transporter activity	1	490	2	47438	0.0205521	0.0797469	96.0061	BnaA07g35920D
GO0018826	methionine gamma-lyase activity	1	490	2	47438	0.0205521	0.0797469	96.0061	BnaA09g53100D
GO0019458	methionine catabolic process via 2-oxobutanoate	1	490	2	47438	0.0205521	0.0797469	96.0061	BnaA09g53100D
GO0019516	lactate oxidation	1	490	2	47438	0.0205521	0.0797469	96.0061	BnaAnng19740D
GO0047681	aryl-alcohol dehydrogenase (NADP+) activity	1	490	2	47438	0.0205521	0.0797469	96.0061	BnaC03g61120D
GO0051990	(R)-2-hydroxyglutarate dehydrogenase activity	1	490	2	47438	0.0205521	0.0797469	96.0061	BnaAnng19740D
GO1902023	L-arginine transport	1	490	2	47438	0.0205521	0.0797469	96.0061	BnaA07g35920D
GO1902616	acyl carnitine transmembrane transport	1	490	2	47438	0.0205521	0.0797469	96.0061	BnaA07g35920D
GO1903400	L-arginine transmembrane transport	1	490	2	47438	0.0205521	0.0797469	96.0061	BnaA07g35920D
GO1990575	mitochondrial L-ornithine transmembrane transport	1	490	2	47438	0.0205521	0.0797469	96.0061	BnaA07g35920D
GO0051186	obsolete cofactor metabolic process	21	490	1214	47438	0.0207055	0.0802222	1.71729	BnaC03g58870D;BnaA09g27040D;BnaA04g17560D;BnaA06g11500D;BnaC07g15270D;BnaCnng37100D;BnaA06g13760D;BnaC07g33090D;BnaC07g43770D;BnaC03g04830D;BnaC02g44850D;BnaAnng14080D;BnaC04g41120D;BnaA03g03400D;BnaA04g29550D;BnaCnng47950D;BnaC05g15180D;BnaA02g13370D;BnaC01g41470D;BnaC08g37940D;BnaA06g38800D
GO0043231	intracellular membrane-bounded organelle	314	490	27972	47438	0.0209767	0.0811515	1.24431	BnaC04g52580D;BnaC03g58870D;BnaA10g18700D;BnaCnng37520D;BnaA09g27040D;BnaA09g13300D;BnaC08g21320D;BnaA03g00260D;BnaA07g24330D;BnaA09g09830D;BnaA01g36810D;BnaC03g00160D;BnaA03g39660D;BnaAnng34010D;BnaA08g06260D;BnaA03g13650D;BnaC07g11810D;BnaA07g08700D;BnaAnng04520D;BnaCnng37450D;BnaA01g20660D;BnaA03g17400D;BnaA09g40670D;BnaC03g19520D;BnaAnng23050D;BnaC09g37560D;BnaC05g31460D;BnaC01g01940D;BnaA04g…
GO0043562	cellular response to nitrogen levels	5	490	152	47438	0.0212049	0.081552	3.28221	BnaC07g15270D;BnaA07g38000D;BnaC01g34640D;BnaA05g30920D;BnaA01g27800D
GO0046700	heterocycle catabolic process	14	490	705	47438	0.0213631	0.081552	1.96889	BnaA06g38950D;BnaA09g27040D;BnaC02g09390D;BnaAnng20200D;BnaCnng37100D;BnaA10g14100D;BnaC03g74750D;BnaC02g44850D;BnaA06g22040D;BnaA02g05510D;BnaC01g34640D;BnaA01g27800D;BnaA04g07260D;BnaA06g38800D
GO0003700	DNA-binding transcription factor activity	36	490	4991	47438	0.0214487	0.081552	0.672016	BnaA05g12950D;BnaA06g02010D;BnaC05g31460D;BnaC01g01940D;BnaC03g52080D;BnaC05g38410D;BnaC04g07760D;BnaAnng23990D;BnaC08g31770D;BnaC04g50970D;BnaC06g05930D;BnaA05g01190D;BnaA08g18790D;BnaA06g21470D;BnaAnng01320D;BnaC06g05090D;BnaA01g26030D;BnaC03g58080D;BnaC03g52390D;BnaC03g39000D;BnaC06g38360D;BnaC08g26910D;BnaAnng26200D;BnaCnng09850D;BnaA05g05010D;BnaC04g01070D;BnaCnng37560D;BnaA05g28580D;BnaC02g…
GO0004743	pyruvate kinase activity	2	490	22	47438	0.0214578	0.081552	9.61639	BnaCnng37100D;BnaC02g44850D
GO0006105	succinate metabolic process	2	490	22	47438	0.0214578	0.081552	9.61639	BnaCnng33690D;BnaA01g24820D
GO0010555	response to mannitol	2	490	22	47438	0.0214578	0.081552	9.61639	BnaC02g15270D;BnaA02g10970D
GO0016647	oxidoreductase activity, acting on the CH-NH group of donors, oxygen as acceptor	2	490	22	47438	0.0214578	0.081552	9.61639	BnaC03g06000D;BnaA03g04460D
GO0033306	phytol metabolic process	2	490	22	47438	0.0214578	0.081552	9.61639	BnaC07g23920D;BnaA06g32640D
GO0042362	fat-soluble vitamin biosynthetic process	2	490	22	47438	0.0214578	0.081552	9.61639	BnaC02g13860D;BnaA02g09960D
GO0044375	regulation of peroxisome size	2	490	22	47438	0.0214578	0.081552	9.61639	BnaA07g18900D;BnaCnng13410D
GO1903173	fatty alcohol metabolic process	2	490	22	47438	0.0214578	0.081552	9.61639	BnaC07g23920D;BnaA06g32640D
GO1990069	stomatal opening	2	490	22	47438	0.0214578	0.081552	9.61639	BnaA09g09830D;BnaCnng44750D
GO0048367	shoot system development	39	490	2616	47438	0.0217348	0.0824842	1.48893	BnaA09g27040D;BnaC08g21320D;BnaA03g00260D;BnaC03g00160D;BnaC01g01940D;BnaC04g07760D;BnaC09g34350D;BnaA03g26220D;BnaC05g14940D;BnaC03g73200D;BnaCnng33690D;BnaA09g35800D;BnaC03g04830D;BnaC05g11630D;BnaA06g13250D;BnaC05g14810D;BnaC02g15270D;BnaA06g10010D;BnaC07g39210D;BnaAnng26200D;BnaC01g26220D;BnaA05g05010D;BnaA03g03400D;BnaA06g18440D;BnaC08g36840D;BnaCnng37560D;BnaC04g53030D;BnaC06g34480D;BnaA10g…
GO0044093	positive regulation of molecular function	3	490	955	47438	0.0219576	0.0832077	0.297629	BnaC07g48820D;BnaAnng14080D;BnaA02g13370D
GO0009814	defense response, incompatible interaction	12	490	585	47438	0.02199	0.0832089	2.03181	BnaC03g59270D;BnaA06g24600D;BnaC03g52390D;BnaA05g33880D;BnaC04g53030D;BnaA09g47670D;BnaCnng30450D;BnaA05g03420D;BnaA06g36140D;BnaC07g18960D;BnaC03g45280D;BnaC01g41470D
GO0071555	cell wall organization	14	490	711	47438	0.0221556	0.0837131	1.95168	BnaA10g18700D;BnaC08g21320D;BnaAnng23050D;BnaC05g14940D;BnaC03g67980D;BnaA02g35330D;BnaA02g22470D;BnaC06g38360D;BnaC01g26220D;BnaC06g32660D;BnaA02g23870D;BnaC09g42430D;BnaC01g41470D;BnaA02g35250D
GO0030154	cell differentiation	18	490	2898	47438	0.022356	0.0843021	0.583528	BnaCnng37520D;BnaC04g07760D;BnaC09g40960D;BnaCnng33690D;BnaC01g10130D;BnaC04g45790D;BnaC05g13120D;BnaC06g01490D;BnaC08g24280D;BnaA06g04140D;BnaA09g32110D;BnaA04g22080D;BnaA09g33460D;BnaA01g24820D;BnaC04g06760D;BnaC05g26170D;BnaC04g45800D;BnaA05g16130D
GO0003006	developmental process involved in reproduction	60	490	4359	47438	0.0223765	0.0843021	1.38428	BnaCnng37520D;BnaA09g27040D;BnaA03g00260D;BnaC03g00160D;BnaCnng55020D;BnaC01g01940D;BnaC08g13910D;BnaCnng37100D;BnaCnng27950D;BnaC06g38200D;BnaC07g43770D;BnaCnng33690D;BnaC04g25500D;BnaA09g32380D;BnaA06g00850D;BnaA09g35800D;BnaA09g05190D;BnaA06g09900D;BnaC01g10130D;BnaC01g00680D;BnaC04g28570D;BnaC05g11630D;BnaA09g28510D;BnaC08g26260D;BnaA04g03610D;BnaC04g45790D;BnaA06g13250D;BnaC02g44850D;BnaA01g…
GO0009890	negative regulation of biosynthetic process	24	490	1433	47438	0.0227415	0.0855531	1.66455	BnaA06g38950D;BnaC02g09390D;BnaC04g07710D;BnaCnng27210D;BnaC05g38410D;BnaC04g07760D;BnaAnng23990D;BnaA10g14100D;BnaA08g18790D;BnaA06g13250D;BnaA01g26030D;BnaC03g58080D;BnaC05g14810D;BnaC03g39000D;BnaA08g17540D;BnaC08g37780D;BnaA02g05510D;BnaA08g23150D;BnaC08g36840D;BnaC02g26030D;BnaA09g44300D;BnaA02g15990D;BnaC06g19560D;BnaC05g21480D
GO0018107	peptidyl-threonine phosphorylation	4	490	104	47438	0.0230318	0.0863941	3.8558	BnaA01g06180D;BnaC03g67810D;BnaC01g07450D;BnaA08g12770D
GO0018210	peptidyl-threonine modification	4	490	104	47438	0.0230318	0.0863941	3.8558	BnaA01g06180D;BnaC03g67810D;BnaC01g07450D;BnaA08g12770D
GO0005886	plasma membrane	112	490	8898	47438	0.0231146	0.0865796	1.28696	BnaA09g13300D;BnaC08g21320D;BnaA09g09830D;BnaA08g06260D;BnaC07g11810D;BnaA07g08700D;BnaAnng04520D;BnaCnng37450D;BnaC03g19520D;BnaAnng23050D;BnaC09g37560D;BnaA04g17560D;BnaC04g00160D;BnaC03g59660D;BnaC08g13910D;BnaA03g24720D;BnaC03g47100D;BnaC03g17600D;BnaC01g14990D;BnaC06g12160D;BnaA03g16250D;BnaA08g16310D;BnaA06g13760D;BnaA05g12980D;BnaC07g50310D;BnaC06g38200D;BnaC09g40960D;BnaC08g17850D;BnaC01g…
GO0033108	mitochondrial respiratory chain complex assembly	3	490	59	47438	0.0232417	0.0866832	5.15826	BnaAnng34010D;BnaA02g31990D;BnaC02g40580D
GO0004069	L-aspartate2-oxoglutarate aminotransferase activity	2	490	23	47438	0.0233429	0.0866832	9.15827	BnaC03g04830D;BnaA03g03400D
GO0006103	2-oxoglutarate metabolic process	2	490	23	47438	0.0233429	0.0866832	9.15827	BnaC03g04830D;BnaA03g03400D
GO0006522	alanine metabolic process	2	490	23	47438	0.0233429	0.0866832	9.15827	BnaC03g04830D;BnaA03g03400D
GO0009078	pyruvate family amino acid metabolic process	2	490	23	47438	0.0233429	0.0866832	9.15827	BnaC03g04830D;BnaA03g03400D
GO1901141	regulation of lignin biosynthetic process	2	490	23	47438	0.0233429	0.0866832	9.15827	BnaC09g37560D;BnaA10g15190D
GO0006119	oxidative phosphorylation	4	490	105	47438	0.0237547	0.0878348	3.81754	BnaAnng34010D;BnaA02g31990D;BnaC02g40580D;BnaA03g11410D
GO0030641	regulation of cellular pH	4	490	105	47438	0.0237547	0.0878348	3.81754	BnaC02g33350D;BnaC07g20310D;BnaC02g39630D;BnaA02g25550D
GO0051453	regulation of intracellular pH	4	490	105	47438	0.0237547	0.0878348	3.81754	BnaC02g33350D;BnaC07g20310D;BnaC02g39630D;BnaA02g25550D
GO1990234	transferase complex	8	490	1626	47438	0.0240474	0.0887904	0.464997	BnaA02g26610D;BnaC02g48590D;BnaA10g11760D;BnaC02g42410D;BnaCnng63660D;BnaA05g21090D;BnaA06g27640D;BnaC05g33960D
GO0031323	regulation of cellular metabolic process	80	490	9666	47438	0.0241412	0.08901	0.760499	BnaA06g38950D;BnaA05g12950D;BnaC08g21320D;BnaA06g02010D;BnaC02g09390D;BnaC09g37560D;BnaC05g31460D;BnaC01g01940D;BnaC04g07710D;BnaCnng27210D;BnaC03g52080D;BnaC05g38410D;BnaC04g07760D;BnaC07g36050D;BnaA05g29500D;BnaAnng23990D;BnaA10g11080D;BnaAnng20740D;BnaC08g31770D;BnaA08g28620D;BnaC04g50970D;BnaA03g24900D;BnaC02g48590D;BnaC03g72930D;BnaC06g38200D;BnaC06g05930D;BnaA05g01190D;BnaA10g14100D;BnaCnng…
GO0006814	sodium ion transport	3	490	60	47438	0.0242821	0.0894025	5.06765	BnaA06g01060D;BnaA05g14600D;BnaC02g39630D
GO0044255	cellular lipid metabolic process	32	490	2047	47438	0.0243977	0.0897006	1.55803	BnaC04g52580D;BnaA09g27040D;BnaC09g20370D;BnaC03g19520D;BnaCnng37100D;BnaC07g35800D;BnaC06g12160D;BnaA05g10480D;BnaA03g16250D;BnaA05g12980D;BnaC07g33090D;BnaC07g23920D;BnaA09g32380D;BnaC01g00680D;BnaA05g03050D;BnaC04g28570D;BnaC07g28040D;BnaA03g60000D;BnaC02g44850D;BnaC04g50320D;BnaA09g18440D;BnaA05g33880D;BnaA04g04400D;BnaA06g32640D;BnaC09g40730D;BnaA07g08220D;BnaC06g34480D;BnaA06g18900D;BnaA03g…
GO0019842	vitamin binding	4	490	106	47438	0.0244913	0.089917	3.78004	BnaA09g53100D;BnaA06g36140D;BnaC07g18960D;BnaC03g45280D
GO0004674	protein serinethreonine kinase activity	13	490	2260	47438	0.0246733	0.090457	0.542175	BnaA05g29500D;BnaC01g03320D;BnaA06g15030D;BnaA01g06180D;BnaC03g67810D;BnaC01g28850D;BnaC01g07450D;BnaC08g48860D;BnaA06g18440D;BnaA08g12770D;BnaC05g43850D;BnaC01g06260D;BnaC04g43980D
GO0051139	metal ionproton antiporter activity	2	490	24	47438	0.0252935	0.0926	8.7418	BnaA04g21850D;BnaC04g45720D
GO0000228	nuclear chromosome	1	490	631	47438	0.0256759	0.0935989	0.150349	BnaCnng27210D
GO0009072	aromatic amino acid family metabolic process	5	490	160	47438	0.0257469	0.0935989	3.11227	BnaC03g24530D;BnaC02g13860D;BnaC02g13840D;BnaA02g09890D;BnaA02g09960D
GO0010105	negative regulation of ethylene-activated signaling pathway	5	490	160	47438	0.0257469	0.0935989	3.11227	BnaA09g40670D;BnaC05g38410D;BnaC08g49040D;BnaC03g39000D;BnaA06g27640D
GO0016903	oxidoreductase activity, acting on the aldehyde or oxo group of donors	5	490	160	47438	0.0257469	0.0935989	3.11227	BnaA05g05760D;BnaA08g00900D;BnaCnng47950D;BnaC03g78230D;BnaC04g05620D
GO0070298	negative regulation of phosphorelay signal transduction system	5	490	160	47438	0.0257469	0.0935989	3.11227	BnaA09g40670D;BnaC05g38410D;BnaC08g49040D;BnaC03g39000D;BnaA06g27640D
GO0010154	fruit development	32	490	2088	47438	0.0262884	0.0954334	1.52556	BnaCnng37520D;BnaCnng55020D;BnaC08g13910D;BnaCnng37100D;BnaCnng27950D;BnaC06g38200D;BnaC07g43770D;BnaCnng33690D;BnaC04g25500D;BnaA09g32380D;BnaA06g00850D;BnaA09g05190D;BnaA06g09900D;BnaC01g00680D;BnaC04g28570D;BnaC08g26260D;BnaA04g03610D;BnaC04g45790D;BnaC02g44850D;BnaA01g26030D;BnaAnng26200D;BnaCnng09850D;BnaC08g07490D;BnaC06g06420D;BnaA09g32110D;BnaC08g48460D;BnaA06g16270D;BnaA04g22080D;BnaA07g…
GO0016796	exonuclease activity, active with either ribo- or deoxyribonucleic acids and producing 5'-phosphomonoesters	4	490	109	47438	0.0267832	0.0970937	3.6718	BnaA06g38950D;BnaC02g09390D;BnaA10g14100D;BnaA02g05510D
GO0000813	ESCRT I complex	2	490	25	47438	0.027308	0.0980364	8.36155	BnaA05g07690D;BnaA01g11390D
GO0008061	chitin binding	2	490	25	47438	0.027308	0.0980364	8.36155	BnaA01g34980D;BnaC04g43980D
GO0016634	oxidoreductase activity, acting on the CH-CH group of donors, oxygen as acceptor	2	490	25	47438	0.027308	0.0980364	8.36155	BnaA09g32380D;BnaC04g28570D
GO0019336	phenol-containing compound catabolic process	2	490	25	47438	0.027308	0.0980364	8.36155	BnaC02g13840D;BnaA02g09890D
GO0019954	asexual reproduction	2	490	25	47438	0.027308	0.0980364	8.36155	BnaC08g24280D;BnaA09g33460D
GO0030897	HOPS complex	2	490	25	47438	0.027308	0.0980364	8.36155	BnaA01g04780D;BnaA08g30600D
GO0034214	protein hexamerization	2	490	25	47438	0.027308	0.0980364	8.36155	BnaC03g16140D;BnaC09g27270D
GO0044451	obsolete nucleoplasm part	6	490	1331	47438	0.0273775	0.0981502	0.426849	BnaC04g07710D;BnaC05g38410D;BnaC03g39000D;BnaCnng63660D;BnaA05g21090D;BnaC05g33960D
GO0022904	respiratory electron transport chain	4	490	110	47438	0.0275747	0.0987204	3.63708	BnaAnng34010D;BnaAnng19740D;BnaA02g31990D;BnaC02g40580D
GO0071704	organic substance metabolic process	189	490	20643	47438	0.0278625	0.0994844	0.813326	BnaC04g52580D;BnaC03g58870D;BnaA06g38950D;BnaA10g18700D;BnaCnng37520D;BnaA09g27040D;BnaA09g13300D;BnaC08g21320D;BnaC09g20370D;BnaAnng34010D;BnaC08g28550D;BnaA03g13650D;BnaC02g09390D;BnaC03g19520D;BnaAnng20200D;BnaC05g31460D;BnaCnng55020D;BnaA04g17560D;BnaC05g41830D;BnaA06g11500D;BnaC07g36050D;BnaA05g29500D;BnaAnng10090D;BnaC08g11410D;BnaC08g13910D;BnaCnng37100D;BnaAnng23920D;BnaC09g34350D;BnaA02g…
GO0051253	negative regulation of RNA metabolic process	20	490	1176	47438	0.0278648	0.0994844	1.68564	BnaC04g07710D;BnaCnng27210D;BnaC05g38410D;BnaC04g07760D;BnaAnng23990D;BnaA08g18790D;BnaA06g13250D;BnaA01g26030D;BnaC03g58080D;BnaC05g14810D;BnaC03g39000D;BnaA08g17540D;BnaC08g37780D;BnaA08g23150D;BnaC08g36840D;BnaC02g26030D;BnaA09g44300D;BnaA02g15990D;BnaC06g19560D;BnaC05g21480D
GO0015748	organophosphate ester transport	6	490	222	47438	0.0285256	0.101703	2.68205	BnaC08g13040D;BnaC07g28040D;BnaC04g45790D;BnaA04g22080D;BnaC04g06760D;BnaC04g45800D
GO0051123	RNA polymerase II preinitiation complex assembly	3	490	64	47438	0.0286917	0.102155	4.73494	BnaCnng63660D;BnaA05g21090D;BnaC05g33960D
GO0031967	organelle envelope	21	490	3187	47438	0.029096	0.103311	0.6192	BnaAnng34010D;BnaC03g52730D;BnaC07g15270D;BnaC03g59660D;BnaA03g02070D;BnaC01g14990D;BnaC08g13040D;BnaA08g28620D;BnaC03g16140D;BnaA02g31990D;BnaA06g09900D;BnaC02g40580D;BnaC07g28040D;BnaA03g11410D;BnaC09g27270D;BnaA07g35920D;BnaA09g34030D;BnaA04g29550D;BnaA08g17380D;BnaA06g28310D;BnaA03g02060D
GO0031975	envelope	21	490	3187	47438	0.029096	0.103311	0.6192	BnaAnng34010D;BnaC03g52730D;BnaC07g15270D;BnaC03g59660D;BnaA03g02070D;BnaC01g14990D;BnaC08g13040D;BnaA08g28620D;BnaC03g16140D;BnaA02g31990D;BnaA06g09900D;BnaC02g40580D;BnaC07g28040D;BnaA03g11410D;BnaC09g27270D;BnaA07g35920D;BnaA09g34030D;BnaA04g29550D;BnaA08g17380D;BnaA06g28310D;BnaA03g02060D
GO0050821	protein stabilization	4	490	112	47438	0.0291993	0.103345	3.56958	BnaCnng27950D;BnaC05g15780D;BnaA07g11450D;BnaC07g15380D
GO0007017	microtubule-based process	2	490	781	47438	0.0292656	0.103345	0.242898	BnaC02g39950D;BnaA06g21560D
GO0005622	intracellular anatomical structure	375	490	34193	47438	0.029384	0.103345	1.26605	BnaC04g52580D;BnaC03g58870D;BnaA06g38950D;BnaA10g18700D;BnaCnng37520D;BnaAnng17910D;BnaA09g27040D;BnaA09g13300D;BnaC08g21320D;BnaC09g20370D;BnaA03g00260D;BnaA07g24330D;BnaA09g09830D;BnaA01g36810D;BnaC03g00160D;BnaA03g39660D;BnaAnng34010D;BnaA08g06260D;BnaC08g28550D;BnaA03g13650D;BnaC07g11810D;BnaC02g45160D;BnaA07g08700D;BnaC02g09390D;BnaAnng04520D;BnaCnng37450D;BnaA01g20660D;BnaA03g17400D;BnaA09g…
GO0006541	glutamine metabolic process	2	490	26	47438	0.0293848	0.103345	8.01298	BnaCnng33690D;BnaA01g24820D
GO0009635	response to herbicide	2	490	26	47438	0.0293848	0.103345	8.01298	BnaC04g53030D;BnaA05g03420D
GO0030203	glycosaminoglycan metabolic process	2	490	26	47438	0.0293848	0.103345	8.01298	BnaA10g18700D;BnaC09g42430D
GO0080151	positive regulation of salicylic acid mediated signaling pathway	2	490	26	47438	0.0293848	0.103345	8.01298	BnaA06g13760D;BnaC05g15180D
GO0003690	double-stranded DNA binding	3	490	904	47438	0.0295623	0.103829	0.314825	BnaC06g38360D;BnaC06g04380D;BnaA06g02490D
GO0051247	positive regulation of protein metabolic process	3	490	911	47438	0.0297344	0.104292	0.31235	BnaA05g29500D;BnaC02g48590D;BnaC05g43850D
GO0015299	soluteproton antiporter activity	3	490	65	47438	0.0298558	0.104576	4.65848	BnaA04g21850D;BnaC02g39630D;BnaC04g45720D
GO0010556	regulation of macromolecule biosynthetic process	61	490	7584	47438	0.0301401	0.105429	0.745166	BnaA06g38950D;BnaA05g12950D;BnaA06g02010D;BnaC02g09390D;BnaC05g31460D;BnaC01g01940D;BnaC04g07710D;BnaCnng27210D;BnaC03g52080D;BnaC05g38410D;BnaC04g07760D;BnaA05g29500D;BnaAnng23990D;BnaC08g31770D;BnaC04g50970D;BnaC06g05930D;BnaA05g01190D;BnaA10g14100D;BnaA08g18790D;BnaA06g21470D;BnaAnng01320D;BnaC04g45790D;BnaA06g13250D;BnaC06g05090D;BnaA01g26030D;BnaC03g58080D;BnaC03g52390D;BnaC05g14810D;BnaC03g…
GO0006508	proteolysis	17	490	2692	47438	0.0306542	0.106705	0.594844	BnaCnng37520D;BnaCnng55020D;BnaA02g26610D;BnaA07g33240D;BnaA08g28620D;BnaC02g48590D;BnaAnng17870D;BnaA03g06670D;BnaC02g42410D;BnaA01g11390D;BnaC01g19760D;BnaA01g17170D;BnaA06g27640D;BnaC03g08540D;BnaC07g34380D;BnaA01g31850D;BnaC07g20360D
GO0008843	endochitinase activity	1	490	3	47438	0.0306695	0.106705	48.002	BnaA01g34980D
GO0035885	exochitinase activity	1	490	3	47438	0.0306695	0.106705	48.002	BnaA01g34980D
GO0047844	deoxycytidine deaminase activity	1	490	3	47438	0.0306695	0.106705	48.002	BnaAnng20200D
GO0048589	developmental growth	21	490	1248	47438	0.0314771	0.109368	1.66847	BnaCnng37520D;BnaC09g40960D;BnaCnng33690D;BnaC01g10130D;BnaA08g18790D;BnaA09g28510D;BnaC04g45790D;BnaC03g58080D;BnaC06g01490D;BnaA06g04140D;BnaA09g32110D;BnaC01g23810D;BnaA04g22080D;BnaC01g06260D;BnaA04g25550D;BnaA01g24820D;BnaC04g06760D;BnaC05g21480D;BnaC05g26170D;BnaC04g45800D;BnaA05g16130D
GO0006591	ornithine metabolic process	2	490	27	47438	0.0315224	0.109379	7.6923	BnaA06g36140D;BnaC07g18960D
GO0098662	inorganic cation transmembrane transport	19	490	1095	47438	0.0319597	0.110748	1.71976	BnaA09g09830D;BnaA08g06260D;BnaAnng04520D;BnaC06g13300D;BnaA04g21850D;BnaCnng57580D;BnaC04g51630D;BnaA10g18740D;BnaA03g11410D;BnaCnng44750D;BnaA06g01060D;BnaA10g16170D;BnaA09g34030D;BnaC08g06690D;BnaA05g14600D;BnaC02g39630D;BnaC05g27530D;BnaA07g15180D;BnaC04g45720D
GO0051094	positive regulation of developmental process	13	490	679	47438	0.0324896	0.112434	1.89393	BnaA09g13300D;BnaC08g21320D;BnaC03g24530D;BnaAnng20740D;BnaCnng62150D;BnaC06g17590D;BnaCnng09850D;BnaC01g26220D;BnaA05g05010D;BnaC08g24280D;BnaC08g48460D;BnaA06g16270D;BnaA09g33460D
GO0034765	regulation of ion transmembrane transport	5	490	171	47438	0.0329419	0.113847	2.90535	BnaC05g41830D;BnaAnng23920D;BnaC07g50310D;BnaA05g27660D;BnaA01g37370D
GO0008422	beta-glucosidase activity	6	490	230	47438	0.0330654	0.114122	2.58582	BnaCnng07500D;BnaC04g22390D;BnaA07g17230D;BnaC08g30370D;BnaA09g55500D;BnaC04g22420D
GO0008652	cellular amino acid biosynthetic process	10	490	472	47438	0.0334326	0.115236	2.09623	BnaA01g03680D;BnaA05g05760D;BnaC01g05030D;BnaC05g06260D;BnaA07g35920D;BnaA09g53100D;BnaC04g05620D;BnaA06g36140D;BnaC07g18960D;BnaCnng72260D
GO0000086	G2M transition of mitotic cell cycle	2	490	28	47438	0.0337194	0.115609	7.39628	BnaC05g31460D;BnaA05g20100D
GO0005199	structural constituent of cell wall	2	490	28	47438	0.0337194	0.115609	7.39628	BnaC05g26170D;BnaA05g16130D
GO2001025	positive regulation of response to drug	2	490	28	47438	0.0337194	0.115609	7.39628	BnaA06g13760D;BnaC05g15180D
GO2001040	positive regulation of cellular response to drug	2	490	28	47438	0.0337194	0.115609	7.39628	BnaA06g13760D;BnaC05g15180D
GO0045087	innate immune response	17	490	964	47438	0.0340431	0.116565	1.74584	BnaC03g59270D;BnaC05g38410D;BnaC08g13910D;BnaA06g24600D;BnaA10g18740D;BnaC03g52390D;BnaA05g33880D;BnaC03g39000D;BnaC04g53030D;BnaA09g47670D;BnaCnng30450D;BnaA05g03420D;BnaA06g36140D;BnaC07g18960D;BnaC03g45280D;BnaC01g41470D;BnaC04g43980D
GO0022898	regulation of transmembrane transporter activity	4	490	118	47438	0.0344075	0.117348	3.38127	BnaC05g41830D;BnaAnng23920D;BnaA05g27660D;BnaA01g37370D
GO0032409	regulation of transporter activity	4	490	118	47438	0.0344075	0.117348	3.38127	BnaC05g41830D;BnaAnng23920D;BnaA05g27660D;BnaA01g37370D
GO0032412	regulation of ion transmembrane transporter activity	4	490	118	47438	0.0344075	0.117348	3.38127	BnaC05g41830D;BnaAnng23920D;BnaA05g27660D;BnaA01g37370D
GO0009639	response to red or far red light	1	490	566	47438	0.0346173	0.117908	0.167881	BnaC04g07710D
GO0006928	movement of cell or subcellular component	1	490	572	47438	0.0348285	0.118472	0.166095	BnaA06g21560D
GO0098655	cation transmembrane transport	21	490	1279	47438	0.0349231	0.118638	1.62625	BnaA09g09830D;BnaA08g06260D;BnaAnng04520D;BnaC06g13300D;BnaA04g21850D;BnaCnng57580D;BnaC04g51630D;BnaA10g18740D;BnaA03g11410D;BnaA07g35920D;BnaCnng44750D;BnaA06g01060D;BnaA10g16170D;BnaA09g34030D;BnaC08g06690D;BnaA05g14600D;BnaC02g39630D;BnaC04g18440D;BnaC05g27530D;BnaA07g15180D;BnaC04g45720D
GO0009416	response to light stimulus	35	490	2360	47438	0.0357125	0.121161	1.47636	BnaAnng17910D;BnaA09g27040D;BnaC09g37560D;BnaC04g07710D;BnaC07g15270D;BnaA03g02070D;BnaA10g11080D;BnaA08g28620D;BnaA03g26220D;BnaC06g38200D;BnaC03g73200D;BnaC03g48070D;BnaA08g18790D;BnaC09g53650D;BnaA09g28510D;BnaC03g34940D;BnaAnng01320D;BnaC03g58080D;BnaC05g00780D;BnaC03g52390D;BnaC04g38330D;BnaA06g25550D;BnaA10g15190D;BnaA06g18440D;BnaCnng63660D;BnaA10g02480D;BnaA07g33590D;BnaA05g21090D;BnaC05g…
GO0045488	pectin metabolic process	5	490	175	47438	0.0358386	0.12143	2.83675	BnaA10g18700D;BnaC08g21320D;BnaC08g08130D;BnaC01g26220D;BnaC09g42430D
GO0010272	response to silver ion	2	490	29	47438	0.0359743	0.121572	7.12219	BnaC04g53030D;BnaA05g03420D
GO0034975	protein folding in endoplasmic reticulum	2	490	29	47438	0.0359743	0.121572	7.12219	BnaC06g38200D;BnaA07g33590D
GO0000785	chromatin	1	490	593	47438	0.0364991	0.123184	0.160131	BnaCnng27210D
GO0044454	obsolete nuclear chromosome part	1	490	595	47438	0.0367335	0.123586	0.159585	BnaCnng27210D
GO0071804	potassium ion transport	6	490	236	47438	0.0367613	0.123586	2.51804	BnaA08g06260D;BnaAnng04520D;BnaA10g18740D;BnaC08g06690D;BnaC02g39630D;BnaC05g27530D
GO0071805	potassium ion transmembrane transport	6	490	236	47438	0.0367613	0.123586	2.51804	BnaA08g06260D;BnaAnng04520D;BnaA10g18740D;BnaC08g06690D;BnaC02g39630D;BnaC05g27530D
GO0031330	negative regulation of cellular catabolic process	4	490	121	47438	0.0372008	0.124851	3.29436	BnaA03g24900D;BnaC03g72930D;BnaC07g39210D;BnaA04g07260D
GO0031347	regulation of defense response	17	490	985	47438	0.0372338	0.124851	1.70719	BnaC05g38410D;BnaC04g07760D;BnaAnng23990D;BnaA03g26220D;BnaC03g73200D;BnaA06g13250D;BnaC05g14810D;BnaC03g39000D;BnaA08g17540D;BnaC08g37780D;BnaA08g23150D;BnaC08g36840D;BnaA09g47670D;BnaC02g26030D;BnaA09g44300D;BnaA02g15990D;BnaC06g19560D
GO0048639	positive regulation of developmental growth	3	490	71	47438	0.0373551	0.125096	4.24689	BnaC08g21320D;BnaC06g17590D;BnaC01g26220D
GO0015077	monovalent inorganic cation transmembrane transporter activity	12	490	602	47438	0.0376574	0.125946	1.97254	BnaA09g09830D;BnaC06g13300D;BnaA04g21850D;BnaCnng57580D;BnaA10g18740D;BnaCnng44750D;BnaA06g01060D;BnaA10g16170D;BnaA05g14600D;BnaC02g39630D;BnaA07g15180D;BnaC04g45720D
GO0006775	fat-soluble vitamin metabolic process	2	490	30	47438	0.0382857	0.12739	6.86768	BnaC02g13860D;BnaA02g09960D
GO0006878	cellular copper ion homeostasis	2	490	30	47438	0.0382857	0.12739	6.86768	BnaA05g29010D;BnaC05g43490D
GO0009310	amine catabolic process	2	490	30	47438	0.0382857	0.12739	6.86768	BnaC03g06000D;BnaA03g04460D
GO0042402	cellular biogenic amine catabolic process	2	490	30	47438	0.0382857	0.12739	6.86768	BnaC03g06000D;BnaA03g04460D
GO0070069	cytochrome complex	3	490	72	47438	0.03869	0.128532	4.18525	BnaAnng34010D;BnaA02g31990D;BnaC02g40580D
GO0048869	cellular developmental process	25	490	3566	47438	0.0387587	0.128532	0.659054	BnaCnng37520D;BnaC04g07760D;BnaC09g40960D;BnaCnng33690D;BnaC04g25500D;BnaC01g10130D;BnaA09g28510D;BnaC08g26260D;BnaA04g03610D;BnaC04g45790D;BnaC05g13120D;BnaC06g38360D;BnaC06g01490D;BnaC08g24280D;BnaA06g04140D;BnaA09g32110D;BnaC01g23810D;BnaA04g22080D;BnaA09g33460D;BnaC03g12400D;BnaA01g24820D;BnaC04g06760D;BnaC05g26170D;BnaC04g45800D;BnaA05g16130D
GO0090698	post-embryonic plant morphogenesis	2	490	707	47438	0.0387777	0.128532	0.268823	BnaC01g01940D;BnaA01g00920D
GO0015711	organic anion transport	15	490	850	47438	0.0395528	0.130668	1.74395	BnaCnng56610D;BnaC02g33350D;BnaC08g13040D;BnaA09g52260D;BnaC07g28040D;BnaC04g45790D;BnaC07g20310D;BnaA07g35920D;BnaA09g34030D;BnaA04g23730D;BnaA04g22080D;BnaC04g18440D;BnaC04g06760D;BnaA02g25550D;BnaC04g45800D
GO0071495	cellular response to endogenous stimulus	36	490	2468	47438	0.0399366	0.130668	1.45144	BnaA07g24330D;BnaA03g13650D;BnaC05g41830D;BnaC05g38410D;BnaAnng23920D;BnaA05g27660D;BnaC01g03320D;BnaA07g30430D;BnaC04g40810D;BnaA03g13640D;BnaA04g17200D;BnaA01g37370D;BnaA06g13250D;BnaA05g02510D;BnaC05g14810D;BnaA05g33880D;BnaC06g17590D;BnaC03g39000D;BnaC06g38360D;BnaC06g33910D;BnaC04g02270D;BnaA05g12330D;BnaC06g25430D;BnaC03g16540D;BnaA06g18440D;BnaC08g36840D;BnaCnng37560D;BnaC01g23810D;BnaC04g…
GO0007166	cell surface receptor signaling pathway	3	490	861	47438	0.0400386	0.130668	0.330911	BnaC01g03320D;BnaC08g48860D;BnaC04g43980D
GO0015140	malate transmembrane transporter activity	3	490	73	47438	0.0400488	0.130668	4.12537	BnaC02g33350D;BnaC07g20310D;BnaA02g25550D
GO0015743	malate transport	3	490	73	47438	0.0400488	0.130668	4.12537	BnaC02g33350D;BnaC07g20310D;BnaA02g25550D
GO0052314	phytoalexin metabolic process	3	490	73	47438	0.0400488	0.130668	4.12537	BnaC04g50320D;BnaA06g18440D;BnaC01g41470D
GO0052315	phytoalexin biosynthetic process	3	490	73	47438	0.0400488	0.130668	4.12537	BnaC04g50320D;BnaA06g18440D;BnaC01g41470D
GO0071423	malate transmembrane transport	3	490	73	47438	0.0400488	0.130668	4.12537	BnaC02g33350D;BnaC07g20310D;BnaA02g25550D
GO0008408	3'-5' exonuclease activity	4	490	124	47438	0.0401209	0.130668	3.2118	BnaA06g38950D;BnaC02g09390D;BnaA10g14100D;BnaA02g05510D
GO1901002	positive regulation of response to salt stress	4	490	124	47438	0.0401209	0.130668	3.2118	BnaC03g16140D;BnaC09g27270D;BnaCnng09850D;BnaAnng05950D
GO0048316	seed development	30	490	1986	47438	0.0401427	0.130668	1.50013	BnaCnng37520D;BnaCnng55020D;BnaC08g13910D;BnaCnng37100D;BnaCnng27950D;BnaC06g38200D;BnaC07g43770D;BnaC04g25500D;BnaA09g32380D;BnaA06g00850D;BnaA09g05190D;BnaA06g09900D;BnaC01g00680D;BnaC04g28570D;BnaC08g26260D;BnaA04g03610D;BnaC04g45790D;BnaC02g44850D;BnaA01g26030D;BnaAnng26200D;BnaCnng09850D;BnaC08g07490D;BnaC06g06420D;BnaA09g32110D;BnaC08g48460D;BnaA06g16270D;BnaA04g22080D;BnaA07g33590D;BnaC04g…
GO0012505	endomembrane system	83	490	6492	47438	0.0402702	0.130668	1.28993	BnaA09g13300D;BnaC08g21320D;BnaA09g09830D;BnaC07g11810D;BnaA07g08700D;BnaA09g40670D;BnaC03g19520D;BnaAnng23050D;BnaA04g17560D;BnaA01g04780D;BnaAnng10090D;BnaC09g34350D;BnaA03g24720D;BnaC06g12160D;BnaA03g16250D;BnaA08g16310D;BnaA05g12980D;BnaC07g50310D;BnaC05g14940D;BnaC06g38200D;BnaC09g40960D;BnaC03g67980D;BnaAnng13010D;BnaC08g49040D;BnaA02g35330D;BnaCnng33690D;BnaC03g49920D;BnaC08g08130D;BnaA03g…
GO0045017	glycerolipid biosynthetic process	7	490	305	47438	0.0402834	0.130668	2.26875	BnaC03g19520D;BnaC06g12160D;BnaA03g16250D;BnaA05g12980D;BnaC07g23920D;BnaC01g00680D;BnaA06g32640D
GO0034762	regulation of transmembrane transport	5	490	181	47438	0.0404698	0.130668	2.73969	BnaC05g41830D;BnaAnng23920D;BnaC07g50310D;BnaA05g27660D;BnaA01g37370D
GO0009664	plant-type cell wall organization	10	490	496	47438	0.0405666	0.130668	1.99168	BnaA10g18700D;BnaC08g21320D;BnaAnng23050D;BnaC03g67980D;BnaA02g35330D;BnaA02g22470D;BnaC01g26220D;BnaC06g32660D;BnaC09g42430D;BnaA02g35250D
GO0097237	cellular response to toxic substance	10	490	496	47438	0.0405666	0.130668	1.99168	BnaA08g06260D;BnaAnng04520D;BnaC07g15270D;BnaA06g13760D;BnaC07g43770D;BnaA05g33880D;BnaC08g06690D;BnaC06g32660D;BnaC05g27530D;BnaC05g15180D
GO0006076	(1-3)-beta-D-glucan catabolic process	2	490	31	47438	0.0406522	0.130668	6.63072	BnaCnng07500D;BnaA07g17230D
GO0008810	cellulase activity	2	490	31	47438	0.0406522	0.130668	6.63072	BnaCnng07500D;BnaA07g17230D
GO0000064	L-ornithine transmembrane transporter activity	1	490	4	47438	0.0406826	0.130668	32.0007	BnaA07g35920D
GO0008126	acetylesterase activity	1	490	4	47438	0.0406826	0.130668	32.0007	BnaA06g18900D
GO0008661	1-deoxy-D-xylulose-5-phosphate synthase activity	1	490	4	47438	0.0406826	0.130668	32.0007	BnaC07g33090D
GO0009109	obsolete coenzyme catabolic process	1	490	4	47438	0.0406826	0.130668	32.0007	BnaA06g38800D
GO0010012	steroid 22-alpha hydroxylase activity	1	490	4	47438	0.0406826	0.130668	32.0007	BnaC01g23810D
GO0015822	ornithine transport	1	490	4	47438	0.0406826	0.130668	32.0007	BnaA07g35920D
GO1903352	L-ornithine transmembrane transport	1	490	4	47438	0.0406826	0.130668	32.0007	BnaA07g35920D
GO0009895	negative regulation of catabolic process	4	490	125	47438	0.0411224	0.131663	3.18519	BnaA03g24900D;BnaC03g72930D;BnaC07g39210D;BnaA04g07260D
GO0032270	positive regulation of cellular protein metabolic process	3	490	885	47438	0.0411343	0.131663	0.321739	BnaA05g29500D;BnaC02g48590D;BnaC05g43850D
GO0009555	pollen development	20	490	1205	47438	0.0411448	0.131663	1.64334	BnaA04g17560D;BnaA05g05760D;BnaC04g25500D;BnaC01g10130D;BnaC07g48820D;BnaC05g11630D;BnaC08g26260D;BnaA04g03610D;BnaA06g13250D;BnaC05g14810D;BnaC04g41120D;BnaA06g10010D;BnaC06g38360D;BnaC07g39210D;BnaA06g18440D;BnaC08g36840D;BnaC02g42410D;BnaC03g12400D;BnaC04g05620D;BnaA09g44300D
GO0010393	galacturonan metabolic process	5	490	182	47438	0.0412752	0.131918	2.72415	BnaA10g18700D;BnaC08g21320D;BnaC08g08130D;BnaC01g26220D;BnaC09g42430D
GO0004402	histone acetyltransferase activity	3	490	74	47438	0.0414316	0.132092	4.06718	BnaCnng63660D;BnaA05g21090D;BnaC05g33960D
GO0061733	peptide-lysine-N-acetyltransferase activity	3	490	74	47438	0.0414316	0.132092	4.06718	BnaCnng63660D;BnaA05g21090D;BnaC05g33960D
GO0015078	proton transmembrane transporter activity	9	490	409	47438	0.0415718	0.132292	2.1774	BnaA09g09830D;BnaC06g13300D;BnaA04g21850D;BnaCnng57580D;BnaCnng44750D;BnaA10g16170D;BnaC02g39630D;BnaA07g15180D;BnaC04g45720D
GO0032501	multicellular organismal process	110	490	8905	47438	0.0415964	0.132292	1.25575	BnaCnng37520D;BnaA05g12950D;BnaA09g27040D;BnaC08g21320D;BnaA03g00260D;BnaC03g00160D;BnaC08g28550D;BnaC07g11810D;BnaA07g08700D;BnaCnng55020D;BnaC01g01940D;BnaA04g17560D;BnaC04g07710D;BnaC04g07760D;BnaC08g11410D;BnaC08g13910D;BnaCnng37100D;BnaC09g34350D;BnaC07g35800D;BnaCnng27950D;BnaA05g05760D;BnaA01g13700D;BnaA03g26220D;BnaC05g14940D;BnaC06g38200D;BnaC03g73200D;BnaC09g40960D;BnaA07g30430D;BnaC01g…
GO0005575	cellular_component	432	490	40262	47438	0.0423584	0.13455	1.33108	BnaC04g52580D;BnaC03g58870D;BnaA06g38950D;BnaA10g18700D;BnaCnng37520D;BnaAnng17910D;BnaA09g27040D;BnaA09g13300D;BnaC08g21320D;BnaC09g20370D;BnaA03g00260D;BnaA07g24330D;BnaA09g09830D;BnaA01g36810D;BnaC03g00160D;BnaA03g39660D;BnaAnng34010D;BnaA04g23950D;BnaA08g06260D;BnaC08g28550D;BnaA03g13650D;BnaC07g11810D;BnaC02g45160D;BnaA07g08700D;BnaC02g09390D;BnaAnng04520D;BnaCnng37450D;BnaA01g20660D;BnaA03g…
GO0015556	C4-dicarboxylate transmembrane transporter activity	3	490	75	47438	0.0428382	0.135908	4.01061	BnaC02g33350D;BnaC07g20310D;BnaA02g25550D
GO0051275	beta-glucan catabolic process	2	490	32	47438	0.0430724	0.136484	6.40956	BnaCnng07500D;BnaA07g17230D
GO0006935	chemotaxis	5	490	185	47438	0.0437496	0.13846	2.67858	BnaCnng33690D;BnaC05g11630D;BnaA06g10010D;BnaA06g18440D;BnaA01g24820D
GO0006813	potassium ion transport	6	490	247	47438	0.0442013	0.139421	2.40254	BnaA08g06260D;BnaAnng04520D;BnaA10g18740D;BnaC08g06690D;BnaC02g39630D;BnaC05g27530D
GO0051051	negative regulation of transport	4	490	128	47438	0.0442114	0.139421	3.10793	BnaC05g41830D;BnaAnng23920D;BnaA05g27660D;BnaA01g37370D
GO0017025	TBP-class protein binding	3	490	76	47438	0.0442684	0.139421	3.95558	BnaCnng63660D;BnaA05g21090D;BnaC05g33960D
GO0070897	transcription preinitiation complex assembly	3	490	76	47438	0.0442684	0.139421	3.95558	BnaCnng63660D;BnaA05g21090D;BnaC05g33960D
GO0046034	ATP metabolic process	7	490	312	47438	0.0445595	0.140168	2.21635	BnaAnng34010D;BnaC08g28550D;BnaCnng37100D;BnaA02g31990D;BnaC02g40580D;BnaA03g11410D;BnaC02g44850D
GO0034050	host programmed cell death induced by symbiont	4	490	129	47438	0.0452693	0.142228	3.083	BnaA09g29060D;BnaA10g18740D;BnaA06g36140D;BnaC07g18960D
GO0010507	negative regulation of autophagy	2	490	33	47438	0.045545	0.142748	6.20267	BnaC07g39210D;BnaA04g07260D
GO0046113	nucleobase catabolic process	2	490	33	47438	0.045545	0.142748	6.20267	BnaC01g34640D;BnaA01g27800D
GO0009506	plasmodesma	41	490	2901	47438	0.0457008	0.142786	1.40764	BnaA09g13300D;BnaA09g09830D;BnaA04g23950D;BnaA08g06260D;BnaAnng04520D;BnaA04g17560D;BnaC03g59660D;BnaA07g18900D;BnaC07g50310D;BnaC01g03320D;BnaC03g49920D;BnaC01g10130D;BnaC05g15780D;BnaA07g11450D;BnaC05g13120D;BnaA09g41800D;BnaC04g41120D;BnaC08g07490D;BnaCnng44750D;BnaA06g01060D;BnaA06g23380D;BnaA09g34030D;BnaC08g06690D;BnaC06g32660D;BnaA09g47670D;BnaA05g14600D;BnaAnng11680D;BnaC04g28590D;BnaC08g…
GO0055044	symplast	41	490	2901	47438	0.0457008	0.142786	1.40764	BnaA09g13300D;BnaA09g09830D;BnaA04g23950D;BnaA08g06260D;BnaAnng04520D;BnaA04g17560D;BnaC03g59660D;BnaA07g18900D;BnaC07g50310D;BnaC01g03320D;BnaC03g49920D;BnaC01g10130D;BnaC05g15780D;BnaA07g11450D;BnaC05g13120D;BnaA09g41800D;BnaC04g41120D;BnaC08g07490D;BnaCnng44750D;BnaA06g01060D;BnaA06g23380D;BnaA09g34030D;BnaC08g06690D;BnaC06g32660D;BnaA09g47670D;BnaA05g14600D;BnaAnng11680D;BnaC04g28590D;BnaC08g…
GO0015740	C4-dicarboxylate transport	3	490	77	47438	0.0457223	0.142786	3.90205	BnaC02g33350D;BnaC07g20310D;BnaA02g25550D
GO0007275	multicellular organism development	100	490	8058	47438	0.0458932	0.143147	1.25627	BnaCnng37520D;BnaA05g12950D;BnaA09g27040D;BnaC08g21320D;BnaA03g00260D;BnaC03g00160D;BnaC08g28550D;BnaC07g11810D;BnaA07g08700D;BnaCnng55020D;BnaC01g01940D;BnaA04g17560D;BnaC04g07710D;BnaC04g07760D;BnaC08g11410D;BnaC08g13910D;BnaCnng37100D;BnaC09g34350D;BnaC07g35800D;BnaCnng27950D;BnaA05g05760D;BnaA01g13700D;BnaA03g26220D;BnaC05g14940D;BnaC06g38200D;BnaC03g73200D;BnaC09g40960D;BnaA07g30430D;BnaC01g…
GO0016999	antibiotic metabolic process	7	490	316	47438	0.0471293	0.146692	2.18747	BnaC07g15270D;BnaC03g24530D;BnaA06g13760D;BnaC07g43770D;BnaC03g04830D;BnaA03g03400D;BnaC05g15180D
GO0009888	tissue development	15	490	2365	47438	0.0471951	0.146692	0.599301	BnaCnng37520D;BnaA09g27040D;BnaC08g13910D;BnaC06g38200D;BnaC09g40960D;BnaA06g00850D;BnaC04g45790D;BnaA05g05010D;BnaCnng37560D;BnaC06g06420D;BnaA09g32110D;BnaA04g22080D;BnaA07g33590D;BnaC04g06760D;BnaC04g45800D
GO0004312	fatty acid synthase activity	3	490	78	47438	0.0471995	0.146692	3.84994	BnaA09g28510D;BnaC05g00780D;BnaA10g02480D
GO0071554	cell wall organization or biogenesis	23	490	1463	47438	0.0473478	0.146977	1.55645	BnaA10g18700D;BnaC08g21320D;BnaAnng23050D;BnaAnng10090D;BnaC01g15760D;BnaC05g14940D;BnaC09g40960D;BnaC03g67980D;BnaA02g35330D;BnaA02g22470D;BnaA08g26000D;BnaC06g38360D;BnaC08g13970D;BnaA01g29130D;BnaC07g18010D;BnaA01g13540D;BnaC01g26220D;BnaC06g32660D;BnaCnng30450D;BnaA02g23870D;BnaC09g42430D;BnaC01g41470D;BnaA02g35250D
GO0042330	taxis	5	490	190	47438	0.0480673	0.148857	2.60591	BnaCnng33690D;BnaC05g11630D;BnaA06g10010D;BnaA06g18440D;BnaA01g24820D
GO0044839	cell cycle G2M phase transition	2	490	34	47438	0.0480686	0.148857	6.00871	BnaC05g31460D;BnaA05g20100D
GO0005669	transcription factor TFIID complex	3	490	79	47438	0.0487	0.150633	3.7992	BnaCnng63660D;BnaA05g21090D;BnaC05g33960D
GO0055082	cellular chemical homeostasis	12	490	652	47438	0.0489405	0.151149	1.81647	BnaA03g00260D;BnaA05g29010D;BnaC03g00160D;BnaC05g43490D;BnaC02g33350D;BnaA04g21850D;BnaC04g51630D;BnaC07g20310D;BnaAnng11680D;BnaC02g39630D;BnaA02g25550D;BnaC04g45720D
GO0043067	regulation of programmed cell death	1	490	520	47438	0.0489834	0.151149	0.182942	BnaC07g36050D
GO0031401	positive regulation of protein modification process	1	490	530	47438	0.0492336	0.15174	0.179445	BnaC02g48590D
GO0009892	negative regulation of metabolic process	38	490	2692	47438	0.049457	0.152248	1.4031	BnaA06g38950D;BnaC02g09390D;BnaC01g01940D;BnaC04g07710D;BnaCnng27210D;BnaC05g38410D;BnaC04g07760D;BnaC07g36050D;BnaAnng23990D;BnaA10g11080D;BnaAnng20740D;BnaA08g28620D;BnaA03g24900D;BnaC03g72930D;BnaC06g38200D;BnaA10g14100D;BnaCnng62150D;BnaA08g18790D;BnaC09g53650D;BnaA06g13250D;BnaA01g26030D;BnaC03g58080D;BnaC05g14810D;BnaC03g39000D;BnaC07g39210D;BnaA08g17540D;BnaC08g37780D;BnaA02g05510D;BnaA08g…
GO0072507	divalent inorganic cation homeostasis	5	490	192	47438	0.0498625	0.153166	2.57793	BnaA04g21850D;BnaC04g51630D;BnaA06g01060D;BnaA05g14600D;BnaC04g45720D
GO0042277	peptide binding	6	490	255	47438	0.0501627	0.153166	2.32495	BnaA06g11500D;BnaA06g13760D;BnaC08g24040D;BnaC05g15180D;BnaA09g33230D;BnaC08g37940D
GO0006896	Golgi to vacuole transport	3	490	80	47438	0.0502237	0.153166	3.74978	BnaC03g08040D;BnaC08g24040D;BnaA09g33230D
GO0009695	jasmonic acid biosynthetic process	3	490	80	47438	0.0502237	0.153166	3.74978	BnaA05g10480D;BnaA03g15290D;BnaC04g11470D
GO0070887	cellular response to chemical stimulus	54	490	4035	47438	0.0503605	0.153166	1.33675	BnaA09g13300D;BnaA07g24330D;BnaA08g06260D;BnaA03g13650D;BnaAnng04520D;BnaCnng37450D;BnaC05g41830D;BnaC07g15270D;BnaC05g38410D;BnaA03g02070D;BnaAnng23920D;BnaA06g13760D;BnaA03g26220D;BnaA05g27660D;BnaC03g73200D;BnaC01g03320D;BnaA07g30430D;BnaC04g40810D;BnaC07g43770D;BnaA03g13640D;BnaCnng63310D;BnaA04g17200D;BnaA01g37370D;BnaA06g13250D;BnaA05g02510D;BnaC05g14810D;BnaA05g33880D;BnaC06g17590D;BnaC03g…
GO0004357	glutamate-cysteine ligase activity	1	490	5	47438	0.0505925	0.153166	24	BnaC01g41470D
GO0004457	lactate dehydrogenase activity	1	490	5	47438	0.0505925	0.153166	24	BnaAnng19740D
GO0004458	D-lactate dehydrogenase (cytochrome) activity	1	490	5	47438	0.0505925	0.153166	24	BnaAnng19740D
GO0016898	oxidoreductase activity, acting on the CH-OH group of donors, cytochrome as acceptor	1	490	5	47438	0.0505925	0.153166	24	BnaAnng19740D
GO1900103	positive regulation of endoplasmic reticulum unfolded protein response	1	490	5	47438	0.0505925	0.153166	24	BnaC03g52390D
GO0006531	aspartate metabolic process	2	490	35	47438	0.0506418	0.153166	5.8265	BnaC03g04830D;BnaA03g03400D
GO0006880	intracellular sequestering of iron ion	2	490	35	47438	0.0506418	0.153166	5.8265	BnaA03g00260D;BnaC03g00160D
GO0015037	peptide disulfide oxidoreductase activity	2	490	35	47438	0.0506418	0.153166	5.8265	BnaA06g13760D;BnaC05g15180D
GO0015038	glutathione disulfide oxidoreductase activity	2	490	35	47438	0.0506418	0.153166	5.8265	BnaA06g13760D;BnaC05g15180D
GO0097577	sequestering of iron ion	2	490	35	47438	0.0506418	0.153166	5.8265	BnaA03g00260D;BnaC03g00160D
GO0009536	plastid	79	490	6214	47438	0.0507409	0.153287	1.2787	BnaA09g27040D;BnaC08g21320D;BnaA03g00260D;BnaA01g36810D;BnaC03g00160D;BnaA08g06260D;BnaA03g13650D;BnaAnng04520D;BnaA03g17400D;BnaC03g59270D;BnaC07g15270D;BnaC03g59660D;BnaA03g02070D;BnaCnng37100D;BnaC01g14990D;BnaC08g13040D;BnaA05g10480D;BnaA08g16310D;BnaC07g49920D;BnaA05g05760D;BnaC07g33090D;BnaA08g28620D;BnaC03g16140D;BnaA03g24900D;BnaC03g72930D;BnaC06g38200D;BnaA03g40200D;BnaC04g40810D;BnaC07g…
GO0008374	O-acyltransferase activity	7	490	322	47438	0.051158	0.154367	2.14553	BnaC03g19520D;BnaC06g12160D;BnaA03g16250D;BnaA05g12980D;BnaC07g23920D;BnaA01g29130D;BnaA06g32640D
GO0006464	cellular protein modification process	50	490	6269	47438	0.0514919	0.155014	0.744219	BnaCnng37520D;BnaA03g13650D;BnaC05g31460D;BnaC05g41830D;BnaC07g36050D;BnaA05g29500D;BnaC08g13910D;BnaAnng23920D;BnaC09g34350D;BnaA10g11080D;BnaA06g13760D;BnaC02g48590D;BnaA05g27660D;BnaC01g03320D;BnaA07g30430D;BnaC04g40810D;BnaA06g15030D;BnaA01g06180D;BnaC03g67810D;BnaC01g18020D;BnaC01g28850D;BnaC09g53650D;BnaA03g13640D;BnaC01g07450D;BnaA04g17200D;BnaC02g39950D;BnaA01g37370D;BnaC08g48860D;BnaA01g…
GO0036211	protein modification process	50	490	6269	47438	0.0514919	0.155014	0.744219	BnaCnng37520D;BnaA03g13650D;BnaC05g31460D;BnaC05g41830D;BnaC07g36050D;BnaA05g29500D;BnaC08g13910D;BnaAnng23920D;BnaC09g34350D;BnaA10g11080D;BnaA06g13760D;BnaC02g48590D;BnaA05g27660D;BnaC01g03320D;BnaA07g30430D;BnaC04g40810D;BnaA06g15030D;BnaA01g06180D;BnaC03g67810D;BnaC01g18020D;BnaC01g28850D;BnaC09g53650D;BnaA03g13640D;BnaC01g07450D;BnaA04g17200D;BnaC02g39950D;BnaA01g37370D;BnaC08g48860D;BnaA01g…
GO0015171	amino acid transmembrane transporter activity	6	490	257	47438	0.0517264	0.155491	2.30633	BnaCnng56610D;BnaA09g52260D;BnaA07g35920D;BnaA09g34030D;BnaA04g23730D;BnaC04g18440D
GO0034212	peptide N-acetyltransferase activity	3	490	81	47438	0.0517703	0.155491	3.70163	BnaCnng63660D;BnaA05g21090D;BnaC05g33960D
GO0048582	positive regulation of post-embryonic development	7	490	323	47438	0.05185	0.15555	2.13869	BnaA09g13300D;BnaC03g24530D;BnaAnng20740D;BnaCnng62150D;BnaA05g05010D;BnaC08g48460D;BnaA06g16270D
GO0061630	ubiquitin protein ligase activity	4	490	961	47438	0.0524797	0.157257	0.395535	BnaCnng37520D;BnaA03g06670D;BnaC03g08540D;BnaC07g20360D
GO0006749	glutathione metabolic process	5	490	195	47438	0.0526283	0.15752	2.53706	BnaA06g11500D;BnaA06g13760D;BnaC05g15180D;BnaC01g41470D;BnaC08g37940D
GO0015291	secondary active transmembrane transporter activity	11	490	561	47438	0.0528063	0.157871	1.93729	BnaC06g13300D;BnaC08g13040D;BnaA04g21850D;BnaCnng57580D;BnaA04g13890D;BnaA06g01060D;BnaA10g16170D;BnaA05g14600D;BnaC02g39630D;BnaA07g15180D;BnaC04g45720D
GO0061659	ubiquitin-like protein ligase activity	4	490	977	47438	0.0529144	0.158012	0.388895	BnaCnng37520D;BnaA03g06670D;BnaC03g08540D;BnaC07g20360D
GO0004364	glutathione transferase activity	4	490	136	47438	0.053067	0.158285	2.91907	BnaA06g11500D;BnaA06g13760D;BnaC05g15180D;BnaC08g37940D
GO0006074	(1-3)-beta-D-glucan metabolic process	2	490	36	47438	0.0532635	0.158325	5.65501	BnaCnng07500D;BnaA07g17230D
GO0006821	chloride transport	2	490	36	47438	0.0532635	0.158325	5.65501	BnaC06g13300D;BnaA07g15180D
GO0016559	peroxisome fission	2	490	36	47438	0.0532635	0.158325	5.65501	BnaA07g18900D;BnaCnng13410D
GO0006020	inositol metabolic process	3	490	82	47438	0.0533398	0.15837	3.65469	BnaCnng33690D;BnaC01g00680D;BnaA01g24820D
GO1901000	regulation of response to salt stress	5	490	196	47438	0.0535697	0.158833	2.52372	BnaC04g07710D;BnaC03g16140D;BnaC09g27270D;BnaCnng09850D;BnaAnng05950D
GO0043603	cellular amide metabolic process	10	490	1770	47438	0.0536251	0.158833	0.534896	BnaC03g58870D;BnaA06g11500D;BnaA06g13760D;BnaA09g29060D;BnaCnng47950D;BnaC05g15180D;BnaCnng72260D;BnaC01g41470D;BnaC08g37940D;BnaA06g38800D
GO0048285	organelle fission	2	490	678	47438	0.0536797	0.158833	0.280532	BnaA07g18900D;BnaCnng13410D
GO0000981	DNA-binding transcription factor activity, RNA polymerase II-specific	3	490	816	47438	0.0540333	0.159697	0.349568	BnaC04g07760D;BnaC06g04380D;BnaA06g02490D
GO0009225	nucleotide-sugar metabolic process	4	490	137	47438	0.0542369	0.160116	2.89706	BnaA10g18700D;BnaC08g28550D;BnaC05g13120D;BnaC09g42430D
GO0043085	positive regulation of catalytic activity	3	490	829	47438	0.0543913	0.160389	0.34397	BnaC07g48820D;BnaAnng14080D;BnaA02g13370D
GO0004540	ribonuclease activity	6	490	261	47438	0.0549422	0.161674	2.26996	BnaA06g38950D;BnaC02g09390D;BnaA10g14100D;BnaA02g05510D;BnaA06g33900D;BnaA04g07260D
GO0005739	mitochondrion	47	490	3470	47438	0.0549515	0.161674	1.34904	BnaC03g58870D;BnaA03g00260D;BnaC03g00160D;BnaAnng34010D;BnaA08g06260D;BnaAnng04520D;BnaC03g52730D;BnaC07g15270D;BnaA03g02070D;BnaCnng37100D;BnaA07g18900D;BnaC08g13040D;BnaA05g10480D;BnaA03g26220D;BnaC03g73200D;BnaAnng19740D;BnaCnng33690D;BnaA02g31990D;BnaA06g00850D;BnaA06g09900D;BnaC02g40580D;BnaC03g34940D;BnaC07g28040D;BnaC07g25470D;BnaC03g74750D;BnaA03g11410D;BnaC02g44850D;BnaA06g22040D;BnaA07g…
GO0044424	obsolete intracellular part	371	490	34042	47438	0.0551208	0.161988	1.22934	BnaC04g52580D;BnaC03g58870D;BnaA06g38950D;BnaA10g18700D;BnaCnng37520D;BnaAnng17910D;BnaA09g27040D;BnaA09g13300D;BnaC08g21320D;BnaC09g20370D;BnaA03g00260D;BnaA07g24330D;BnaA09g09830D;BnaA01g36810D;BnaC03g00160D;BnaA03g39660D;BnaAnng34010D;BnaA08g06260D;BnaC08g28550D;BnaA03g13650D;BnaC07g11810D;BnaC02g45160D;BnaA07g08700D;BnaC02g09390D;BnaAnng04520D;BnaCnng37450D;BnaA01g20660D;BnaA03g17400D;BnaA09g…
GO0003677	DNA binding	28	490	3855	47438	0.0552649	0.162121	0.682883	BnaA05g12950D;BnaC01g01940D;BnaCnng27210D;BnaC05g38410D;BnaC04g07760D;BnaAnng23990D;BnaCnng27950D;BnaC08g31770D;BnaC04g50970D;BnaA05g01190D;BnaA08g18790D;BnaAnng01320D;BnaA01g26030D;BnaC03g58080D;BnaC03g39000D;BnaC06g38360D;BnaAnng26200D;BnaC04g01070D;BnaCnng63660D;BnaC02g26030D;BnaC04g00750D;BnaA05g21090D;BnaC05g33960D;BnaC06g19560D;BnaA01g00920D;BnaC05g21480D;BnaC06g04380D;BnaA06g02490D
GO0046527	glucosyltransferase activity	11	490	573	47438	0.0553075	0.162121	1.89543	BnaAnng23050D;BnaC03g17730D;BnaA03g14700D;BnaC03g24530D;BnaC03g67980D;BnaA02g35330D;BnaC03g17740D;BnaA02g22470D;BnaCnng63310D;BnaA03g39380D;BnaA02g35250D
GO0005887	integral component of plasma membrane	3	490	843	47438	0.0553538	0.162121	0.338134	BnaA09g05190D;BnaA10g18740D;BnaC04g22390D
GO0015991	proton transmembrane transport	2	490	37	47438	0.0559324	0.163446	5.49333	BnaA09g09830D;BnaCnng44750D
GO1900458	negative regulation of brassinosteroid mediated signaling pathway	2	490	37	47438	0.0559324	0.163446	5.49333	BnaA05g02510D;BnaC04g02270D
GO0015926	glucosidase activity	6	490	263	47438	0.0565944	0.165195	2.25219	BnaCnng07500D;BnaC04g22390D;BnaA07g17230D;BnaC08g30370D;BnaA09g55500D;BnaC04g22420D
GO0003333	amino acid transmembrane transport	6	490	264	47438	0.0574317	0.16745	2.24342	BnaCnng56610D;BnaA09g52260D;BnaA07g35920D;BnaA09g34030D;BnaA04g23730D;BnaC04g18440D
GO0006081	cellular aldehyde metabolic process	4	490	140	47438	0.0578297	0.168421	2.83297	BnaC07g33090D;BnaA08g00900D;BnaC04g28590D;BnaC03g78230D
GO0010604	positive regulation of macromolecule metabolic process	20	490	2931	47438	0.0583543	0.169758	0.643736	BnaC05g31460D;BnaC04g07710D;BnaA05g29500D;BnaC08g31770D;BnaC04g50970D;BnaC02g48590D;BnaA05g01190D;BnaAnng01320D;BnaC03g52390D;BnaCnng09850D;BnaA05g05010D;BnaAnng05950D;BnaC05g43850D;BnaCnng63660D;BnaC04g00750D;BnaA05g21090D;BnaC05g33960D;BnaA05g20100D;BnaC06g04380D;BnaA06g02490D
GO0035337	fatty-acyl-CoA metabolic process	2	490	38	47438	0.0586471	0.170419	5.34062	BnaCnng47950D;BnaA06g38800D
GO0009889	regulation of biosynthetic process	66	490	7918	47438	0.0588033	0.170681	0.775051	BnaA06g38950D;BnaA05g12950D;BnaA06g02010D;BnaC02g09390D;BnaC09g37560D;BnaC05g31460D;BnaC01g01940D;BnaC04g07710D;BnaCnng27210D;BnaC03g52080D;BnaC05g38410D;BnaC04g07760D;BnaA05g29500D;BnaAnng23990D;BnaC08g31770D;BnaC04g50970D;BnaC06g05930D;BnaA05g01190D;BnaA10g14100D;BnaA08g18790D;BnaA06g21470D;BnaAnng01320D;BnaC04g45790D;BnaA06g13250D;BnaC06g05090D;BnaA01g26030D;BnaC03g58080D;BnaC03g52390D;BnaC05g…
GO0043933	protein-containing complex subunit organization	13	490	2083	47438	0.0591196	0.171407	0.590865	BnaAnng34010D;BnaA08g28620D;BnaC03g16140D;BnaA02g31990D;BnaA09g05190D;BnaA06g09900D;BnaC02g40580D;BnaC09g27270D;BnaA09g53100D;BnaC02g10080D;BnaCnng63660D;BnaA05g21090D;BnaC05g33960D
GO0071669	plant-type cell wall organization or biogenesis	15	490	872	47438	0.0592278	0.171529	1.69837	BnaA10g18700D;BnaC08g21320D;BnaAnng23050D;BnaAnng10090D;BnaC09g40960D;BnaC03g67980D;BnaA02g35330D;BnaA02g22470D;BnaA08g26000D;BnaC08g13970D;BnaC07g18010D;BnaC01g26220D;BnaC06g32660D;BnaC09g42430D;BnaA02g35250D
GO0048731	system development	79	490	6264	47438	0.060125	0.171944	1.26681	BnaCnng37520D;BnaA09g27040D;BnaC08g21320D;BnaA03g00260D;BnaC03g00160D;BnaCnng55020D;BnaC01g01940D;BnaC04g07760D;BnaC08g13910D;BnaCnng37100D;BnaC09g34350D;BnaCnng27950D;BnaA05g05760D;BnaA03g26220D;BnaC05g14940D;BnaC06g38200D;BnaC03g73200D;BnaC09g40960D;BnaA07g30430D;BnaC07g43770D;BnaCnng33690D;BnaC04g25500D;BnaA09g32380D;BnaA06g00850D;BnaA09g35800D;BnaA09g05190D;BnaA06g09900D;BnaC03g04830D;BnaC01g…
GO0080134	regulation of response to stress	25	490	1640	47438	0.0603349	0.171944	1.50914	BnaC04g07710D;BnaC05g38410D;BnaC04g07760D;BnaAnng23990D;BnaC03g16140D;BnaA03g26220D;BnaC03g73200D;BnaA06g13250D;BnaC09g27270D;BnaC03g52390D;BnaC05g14810D;BnaC03g39000D;BnaA08g17540D;BnaCnng09850D;BnaC08g37780D;BnaA06g18440D;BnaA08g23150D;BnaC08g36840D;BnaAnng05950D;BnaA09g47670D;BnaC04g28590D;BnaC02g26030D;BnaA09g44300D;BnaA02g15990D;BnaC06g19560D
GO0001561	fatty acid alpha-oxidation	1	490	6	47438	0.0604002	0.171944	19.1996	BnaA05g33880D
GO0004126	cytidine deaminase activity	1	490	6	47438	0.0604002	0.171944	19.1996	BnaAnng20200D
GO0004512	inositol-3-phosphate synthase activity	1	490	6	47438	0.0604002	0.171944	19.1996	BnaC01g00680D
GO0004666	prostaglandin-endoperoxide synthase activity	1	490	6	47438	0.0604002	0.171944	19.1996	BnaA05g33880D
GO0005290	L-histidine transmembrane transporter activity	1	490	6	47438	0.0604002	0.171944	19.1996	BnaA07g35920D
GO0006216	cytidine catabolic process	1	490	6	47438	0.0604002	0.171944	19.1996	BnaAnng20200D
GO0009972	cytidine deamination	1	490	6	47438	0.0604002	0.171944	19.1996	BnaAnng20200D
GO0010945	CoA pyrophosphatase activity	1	490	6	47438	0.0604002	0.171944	19.1996	BnaC03g58870D
GO0019371	cyclooxygenase pathway	1	490	6	47438	0.0604002	0.171944	19.1996	BnaA05g33880D
GO0047545	2-hydroxyglutarate dehydrogenase activity	1	490	6	47438	0.0604002	0.171944	19.1996	BnaAnng19740D
GO0089709	L-histidine transmembrane transport	1	490	6	47438	0.0604002	0.171944	19.1996	BnaA07g35920D
GO0010104	regulation of ethylene-activated signaling pathway	5	490	203	47438	0.0604324	0.171944	2.43414	BnaA09g40670D;BnaC05g38410D;BnaC08g49040D;BnaC03g39000D;BnaA06g27640D
GO0010431	seed maturation	5	490	203	47438	0.0604324	0.171944	2.43414	BnaCnng37100D;BnaCnng27950D;BnaC07g43770D;BnaA09g05190D;BnaC02g44850D
GO0070297	regulation of phosphorelay signal transduction system	5	490	203	47438	0.0604324	0.171944	2.43414	BnaA09g40670D;BnaC05g38410D;BnaC08g49040D;BnaC03g39000D;BnaA06g27640D
GO0005911	cell-cell junction	41	490	2985	47438	0.061213	0.173952	1.36487	BnaA09g13300D;BnaA09g09830D;BnaA04g23950D;BnaA08g06260D;BnaAnng04520D;BnaA04g17560D;BnaC03g59660D;BnaA07g18900D;BnaC07g50310D;BnaC01g03320D;BnaC03g49920D;BnaC01g10130D;BnaC05g15780D;BnaA07g11450D;BnaC05g13120D;BnaA09g41800D;BnaC04g41120D;BnaC08g07490D;BnaCnng44750D;BnaA06g01060D;BnaA06g23380D;BnaA09g34030D;BnaC08g06690D;BnaC06g32660D;BnaA09g47670D;BnaA05g14600D;BnaAnng11680D;BnaC04g28590D;BnaC08g…
GO0009826	unidimensional cell growth	15	490	883	47438	0.0613541	0.173952	1.67645	BnaCnng37520D;BnaCnng33690D;BnaC01g10130D;BnaA09g28510D;BnaC04g45790D;BnaC06g01490D;BnaA06g04140D;BnaA09g32110D;BnaC01g23810D;BnaA04g22080D;BnaA01g24820D;BnaC04g06760D;BnaC05g26170D;BnaC04g45800D;BnaA05g16130D
GO0006743	ubiquinone metabolic process	2	490	39	47438	0.0614065	0.173952	5.19617	BnaA04g17560D;BnaC04g41120D
GO0006744	ubiquinone biosynthetic process	2	490	39	47438	0.0614065	0.173952	5.19617	BnaA04g17560D;BnaC04g41120D
GO0030004	cellular monovalent inorganic cation homeostasis	4	490	144	47438	0.0628133	0.177549	2.75179	BnaC02g33350D;BnaC07g20310D;BnaC02g39630D;BnaA02g25550D
GO0031647	regulation of protein stability	4	490	144	47438	0.0628133	0.177549	2.75179	BnaCnng27950D;BnaC05g15780D;BnaA07g11450D;BnaC07g15380D
GO0098660	inorganic ion transmembrane transport	20	490	1255	47438	0.0632273	0.178524	1.57509	BnaA09g09830D;BnaA08g06260D;BnaAnng04520D;BnaC03g52730D;BnaC06g13300D;BnaA04g21850D;BnaCnng57580D;BnaC04g51630D;BnaA10g18740D;BnaA03g11410D;BnaCnng44750D;BnaA06g01060D;BnaA10g16170D;BnaA09g34030D;BnaC08g06690D;BnaA05g14600D;BnaC02g39630D;BnaC05g27530D;BnaA07g15180D;BnaC04g45720D
GO0006865	amino acid transport	6	490	271	47438	0.0634997	0.179098	2.18383	BnaCnng56610D;BnaA09g52260D;BnaA07g35920D;BnaA09g34030D;BnaA04g23730D;BnaC04g18440D
GO0016709	oxidoreductase activity, acting on paired donors, with incorporation or reduction of molecular oxygen, NAD(P)H as one donor, and incorporation of one atom of oxygen	8	490	380	47438	0.0642513	0.181021	2.07808	BnaA04g17560D;BnaC07g35800D;BnaAnng31420D;BnaC04g50320D;BnaC01g01500D;BnaC04g41120D;BnaC01g01490D;BnaC02g35940D
GO0005342	organic acid transmembrane transporter activity	9	490	470	47438	0.0645382	0.181435	1.88681	BnaCnng56610D;BnaC02g33350D;BnaA09g52260D;BnaC07g20310D;BnaA07g35920D;BnaA09g34030D;BnaA04g23730D;BnaC04g18440D;BnaA02g25550D
GO0046943	carboxylic acid transmembrane transporter activity	9	490	470	47438	0.0645382	0.181435	1.88681	BnaCnng56610D;BnaC02g33350D;BnaA09g52260D;BnaC07g20310D;BnaA07g35920D;BnaA09g34030D;BnaA04g23730D;BnaC04g18440D;BnaA02g25550D
GO0016192	vesicle-mediated transport	8	490	1464	47438	0.0647549	0.181765	0.518581	BnaA01g04780D;BnaC01g10130D;BnaA08g30600D;BnaC03g08040D;BnaA01g11390D;BnaC01g06260D;BnaC08g24040D;BnaA09g33230D
GO0009226	nucleotide-sugar biosynthetic process	3	490	89	47438	0.0649526	0.181765	3.35672	BnaA10g18700D;BnaC05g13120D;BnaC09g42430D
GO0050660	flavin adenine dinucleotide binding	3	490	89	47438	0.0649526	0.181765	3.35672	BnaAnng19740D;BnaC03g06000D;BnaA03g04460D
GO0005623	obsolete cell	419	490	39031	47438	0.0650061	0.181765	1.27406	BnaC04g52580D;BnaC03g58870D;BnaA06g38950D;BnaA10g18700D;BnaCnng37520D;BnaAnng17910D;BnaA09g27040D;BnaA09g13300D;BnaC08g21320D;BnaC09g20370D;BnaA03g00260D;BnaA07g24330D;BnaA09g09830D;BnaA01g36810D;BnaC03g00160D;BnaA03g39660D;BnaAnng34010D;BnaA08g06260D;BnaC08g28550D;BnaA03g13650D;BnaC07g11810D;BnaC02g45160D;BnaA07g08700D;BnaC02g09390D;BnaAnng04520D;BnaCnng37450D;BnaA01g20660D;BnaA03g17400D;BnaA09g…
GO0044464	obsolete cell part	419	490	39031	47438	0.0650061	0.181765	1.27406	BnaC04g52580D;BnaC03g58870D;BnaA06g38950D;BnaA10g18700D;BnaCnng37520D;BnaAnng17910D;BnaA09g27040D;BnaA09g13300D;BnaC08g21320D;BnaC09g20370D;BnaA03g00260D;BnaA07g24330D;BnaA09g09830D;BnaA01g36810D;BnaC03g00160D;BnaA03g39660D;BnaAnng34010D;BnaA08g06260D;BnaC08g28550D;BnaA03g13650D;BnaC07g11810D;BnaC02g45160D;BnaA07g08700D;BnaC02g09390D;BnaAnng04520D;BnaCnng37450D;BnaA01g20660D;BnaA03g17400D;BnaA09g…
GO0034622	cellular protein-containing complex assembly	8	490	1477	47438	0.0652989	0.182386	0.513845	BnaAnng34010D;BnaA08g28620D;BnaA02g31990D;BnaA06g09900D;BnaC02g40580D;BnaCnng63660D;BnaA05g21090D;BnaC05g33960D
GO1900376	regulation of secondary metabolite biosynthetic process	4	490	146	47438	0.0653872	0.182437	2.71292	BnaC09g37560D;BnaA10g15190D;BnaC08g24280D;BnaA09g33460D
GO0009314	response to radiation	35	490	2485	47438	0.0656125	0.182869	1.39711	BnaAnng17910D;BnaA09g27040D;BnaC09g37560D;BnaC04g07710D;BnaC07g15270D;BnaA03g02070D;BnaA10g11080D;BnaA08g28620D;BnaA03g26220D;BnaC06g38200D;BnaC03g73200D;BnaC03g48070D;BnaA08g18790D;BnaC09g53650D;BnaA09g28510D;BnaC03g34940D;BnaAnng01320D;BnaC03g58080D;BnaC05g00780D;BnaC03g52390D;BnaC04g38330D;BnaA06g25550D;BnaA10g15190D;BnaA06g18440D;BnaCnng63660D;BnaA10g02480D;BnaA07g33590D;BnaA05g21090D;BnaC05g…
GO0044271	cellular nitrogen compound biosynthetic process	25	490	3451	47438	0.065872	0.183395	0.682981	BnaC03g58870D;BnaA10g18700D;BnaA09g27040D;BnaC08g28550D;BnaCnng37100D;BnaC07g33090D;BnaA09g29060D;BnaC03g28300D;BnaA03g11410D;BnaC05g13120D;BnaC02g44850D;BnaC07g26280D;BnaA06g18440D;BnaA03g23800D;BnaCnng63660D;BnaC02g38400D;BnaA05g21090D;BnaC05g33960D;BnaCnng72260D;BnaC09g42430D;BnaC01g41470D;BnaC06g04380D;BnaA06g30390D;BnaA06g02490D;BnaA06g38800D
GO0098739	import across plasma membrane	2	490	41	47438	0.0670545	0.186486	4.92949	BnaC02g39630D;BnaC04g18440D
GO0006820	anion transport	20	490	1285	47438	0.0675743	0.187731	1.53673	BnaC03g52730D;BnaC06g13300D;BnaCnng56610D;BnaC02g33350D;BnaC08g13040D;BnaA09g52260D;BnaC07g28040D;BnaC04g45790D;BnaC07g20310D;BnaA03g33540D;BnaA07g35920D;BnaA07g28390D;BnaA09g34030D;BnaA04g23730D;BnaA04g22080D;BnaC04g18440D;BnaC04g06760D;BnaA07g15180D;BnaA02g25550D;BnaC04g45800D
GO0034605	cellular response to heat	4	490	148	47438	0.0680154	0.188503	2.67513	BnaAnng20740D;BnaC03g16140D;BnaCnng62150D;BnaC09g27270D
GO1903825	organic acid transmembrane transport	9	490	477	47438	0.0683666	0.188503	1.85831	BnaCnng56610D;BnaC02g33350D;BnaA09g52260D;BnaC07g20310D;BnaA07g35920D;BnaA09g34030D;BnaA04g23730D;BnaC04g18440D;BnaA02g25550D
GO1905039	carboxylic acid transmembrane transport	9	490	477	47438	0.0683666	0.188503	1.85831	BnaCnng56610D;BnaC02g33350D;BnaA09g52260D;BnaC07g20310D;BnaA07g35920D;BnaA09g34030D;BnaA04g23730D;BnaC04g18440D;BnaA02g25550D
GO2000117	negative regulation of cysteine-type endopeptidase activity	3	490	91	47438	0.0684667	0.188503	3.28029	BnaC07g36050D;BnaAnng20740D;BnaCnng62150D
GO1903046	meiotic cell cycle process	1	490	480	47438	0.0693559	0.188503	0.19839	BnaC03g12400D
GO0006913	nucleocytoplasmic transport	1	490	486	47438	0.0694557	0.188503	0.19591	BnaA05g05010D
GO0051169	nuclear transport	1	490	486	47438	0.0694557	0.188503	0.19591	BnaA05g05010D
GO0009653	anatomical structure morphogenesis	26	490	3555	47438	0.0695181	0.188503	0.689419	BnaCnng37520D;BnaC08g21320D;BnaC01g01940D;BnaC04g07760D;BnaC09g40960D;BnaCnng33690D;BnaC04g25500D;BnaC01g10130D;BnaA09g28510D;BnaC08g26260D;BnaA04g03610D;BnaC04g45790D;BnaC06g38360D;BnaC01g26220D;BnaC06g01490D;BnaA06g04140D;BnaCnng37560D;BnaA09g32110D;BnaC01g23810D;BnaA04g22080D;BnaA01g24820D;BnaC04g06760D;BnaA01g00920D;BnaC05g26170D;BnaC04g45800D;BnaA05g16130D
GO0015988	energy coupled proton transmembrane transport, against electrochemical gradient	2	490	42	47438	0.0699408	0.188503	4.80615	BnaA09g09830D;BnaCnng44750D
GO0006185	dGDP biosynthetic process	1	490	7	47438	0.0701068	0.188503	15.9993	BnaC08g28550D
GO0009136	purine nucleoside diphosphate biosynthetic process	1	490	7	47438	0.0701068	0.188503	15.9993	BnaC08g28550D
GO0009153	purine deoxyribonucleotide biosynthetic process	1	490	7	47438	0.0701068	0.188503	15.9993	BnaC08g28550D
GO0009170	purine deoxyribonucleoside monophosphate metabolic process	1	490	7	47438	0.0701068	0.188503	15.9993	BnaC08g28550D
GO0009180	purine ribonucleoside diphosphate biosynthetic process	1	490	7	47438	0.0701068	0.188503	15.9993	BnaC08g28550D
GO0009182	purine deoxyribonucleoside diphosphate metabolic process	1	490	7	47438	0.0701068	0.188503	15.9993	BnaC08g28550D
GO0009183	purine deoxyribonucleoside diphosphate biosynthetic process	1	490	7	47438	0.0701068	0.188503	15.9993	BnaC08g28550D
GO0009188	ribonucleoside diphosphate biosynthetic process	1	490	7	47438	0.0701068	0.188503	15.9993	BnaC08g28550D
GO0016767	geranylgeranyl-diphosphate geranylgeranyltransferase activity	1	490	7	47438	0.0701068	0.188503	15.9993	BnaC09g40730D
GO0034338	short-chain carboxylesterase activity	1	490	7	47438	0.0701068	0.188503	15.9993	BnaA06g18900D
GO0034436	glycoprotein transport	1	490	7	47438	0.0701068	0.188503	15.9993	BnaC08g28550D
GO0045117	azole transmembrane transport	1	490	7	47438	0.0701068	0.188503	15.9993	BnaA07g35920D
GO0046054	dGMP metabolic process	1	490	7	47438	0.0701068	0.188503	15.9993	BnaC08g28550D
GO0046060	dATP metabolic process	1	490	7	47438	0.0701068	0.188503	15.9993	BnaC08g28550D
GO0046066	dGDP metabolic process	1	490	7	47438	0.0701068	0.188503	15.9993	BnaC08g28550D
GO0046711	GDP biosynthetic process	1	490	7	47438	0.0701068	0.188503	15.9993	BnaC08g28550D
GO0048700	acquisition of desiccation tolerance in seed	1	490	7	47438	0.0701068	0.188503	15.9993	BnaCnng27950D
GO0070509	calcium ion import	1	490	7	47438	0.0701068	0.188503	15.9993	BnaA10g18740D
GO0080136	priming of cellular response to stress	1	490	7	47438	0.0701068	0.188503	15.9993	BnaA06g18440D
GO0097439	acquisition of desiccation tolerance	1	490	7	47438	0.0701068	0.188503	15.9993	BnaCnng27950D
GO1900101	regulation of endoplasmic reticulum unfolded protein response	1	490	7	47438	0.0701068	0.188503	15.9993	BnaC03g52390D
GO1901474	azole transmembrane transporter activity	1	490	7	47438	0.0701068	0.188503	15.9993	BnaA07g35920D
GO0042775	mitochondrial ATP synthesis coupled electron transport	3	490	92	47438	0.0702556	0.188707	3.24336	BnaAnng34010D;BnaA02g31990D;BnaC02g40580D
GO0070417	cellular response to cold	4	490	150	47438	0.0706974	0.189697	2.63837	BnaC09g37560D;BnaCnng63310D;BnaC03g52390D;BnaA10g15190D
GO0042773	ATP synthesis coupled electron transport	3	490	93	47438	0.0720654	0.193168	3.20726	BnaAnng34010D;BnaA02g31990D;BnaC02g40580D
GO0051321	meiotic cell cycle	1	490	513	47438	0.0725183	0.194181	0.185471	BnaC03g12400D
GO1902456	regulation of stomatal opening	2	490	43	47438	0.072867	0.194914	4.68882	BnaA10g11080D;BnaC09g53650D
GO0009909	regulation of flower development	2	490	628	47438	0.073494	0.196388	0.303266	BnaA05g12950D;BnaA05g05010D
GO0015405	ATPase-coupled transmembrane transporter activity	2	490	637	47438	0.0737119	0.196768	0.298909	BnaA09g09830D;BnaCnng44750D
GO0015399	primary active transmembrane transporter activity	2	490	641	47438	0.0739318	0.196991	0.297012	BnaA09g09830D;BnaCnng44750D
GO0009526	plastid envelope	11	490	1798	47438	0.0739477	0.196991	0.580358	BnaC07g15270D;BnaC03g59660D;BnaA03g02070D;BnaC01g14990D;BnaC08g13040D;BnaA08g28620D;BnaC03g16140D;BnaC09g27270D;BnaA04g29550D;BnaA08g17380D;BnaA03g02060D
GO0090696	post-embryonic plant organ development	2	490	643	47438	0.07407	0.197114	0.296073	BnaC01g01940D;BnaA01g00920D
GO0009850	auxin metabolic process	4	490	153	47438	0.0748206	0.198908	2.58508	BnaC03g17730D;BnaA03g14700D;BnaC03g17740D;BnaC07g28040D
GO0016741	transferase activity, transferring one-carbon groups	2	490	652	47438	0.0749226	0.198975	0.291917	BnaC05g31460D;BnaA05g20100D
GO0016053	organic acid biosynthetic process	21	490	1369	47438	0.075597	0.200289	1.51468	BnaA10g18700D;BnaCnng37100D;BnaA01g03680D;BnaA05g10480D;BnaA05g05760D;BnaC01g05030D;BnaA03g50170D;BnaC05g06260D;BnaC02g44850D;BnaA05g33880D;BnaA07g35920D;BnaA09g53100D;BnaC04g28590D;BnaC07g42640D;BnaA03g15290D;BnaC04g05620D;BnaA06g36140D;BnaC07g18960D;BnaC04g11470D;BnaCnng72260D;BnaC09g42430D
GO0046394	carboxylic acid biosynthetic process	21	490	1369	47438	0.075597	0.200289	1.51468	BnaA10g18700D;BnaCnng37100D;BnaA01g03680D;BnaA05g10480D;BnaA05g05760D;BnaC01g05030D;BnaA03g50170D;BnaC05g06260D;BnaC02g44850D;BnaA05g33880D;BnaA07g35920D;BnaA09g53100D;BnaC04g28590D;BnaC07g42640D;BnaA03g15290D;BnaC04g05620D;BnaA06g36140D;BnaC07g18960D;BnaC04g11470D;BnaCnng72260D;BnaC09g42430D
GO0030054	cell junction	41	490	3008	47438	0.0756491	0.200289	1.35358	BnaA09g13300D;BnaA09g09830D;BnaA04g23950D;BnaA08g06260D;BnaAnng04520D;BnaA04g17560D;BnaC03g59660D;BnaA07g18900D;BnaC07g50310D;BnaC01g03320D;BnaC03g49920D;BnaC01g10130D;BnaC05g15780D;BnaA07g11450D;BnaC05g13120D;BnaA09g41800D;BnaC04g41120D;BnaC08g07490D;BnaCnng44750D;BnaA06g01060D;BnaA06g23380D;BnaA09g34030D;BnaC08g06690D;BnaC06g32660D;BnaA09g47670D;BnaA05g14600D;BnaAnng11680D;BnaC04g28590D;BnaC08g…
GO0004029	aldehyde dehydrogenase (NAD+) activity	2	490	44	47438	0.075832	0.200363	4.57709	BnaA08g00900D;BnaC03g78230D
GO0090404	pollen tube tip	2	490	44	47438	0.075832	0.200363	4.57709	BnaC06g01490D;BnaA06g04140D
GO0006576	cellular biogenic amine metabolic process	4	490	154	47438	0.0762215	0.200983	2.56779	BnaC03g06000D;BnaC03g28300D;BnaA03g04460D;BnaA03g23800D
GO0044106	cellular amine metabolic process	4	490	154	47438	0.0762215	0.200983	2.56779	BnaC03g06000D;BnaC03g28300D;BnaA03g04460D;BnaA03g23800D
GO0055080	cation homeostasis	14	490	818	47438	0.0766099	0.201802	1.68803	BnaA03g00260D;BnaA05g29010D;BnaC03g00160D;BnaC05g43490D;BnaC02g33350D;BnaA04g21850D;BnaC04g51630D;BnaC07g20310D;BnaA06g01060D;BnaA05g14600D;BnaAnng11680D;BnaC02g39630D;BnaA02g25550D;BnaC04g45720D
GO0015085	calcium ion transmembrane transporter activity	5	490	218	47438	0.0767363	0.201929	2.26199	BnaA04g21850D;BnaA10g18740D;BnaA06g01060D;BnaA05g14600D;BnaC04g45720D
GO0042133	neurotransmitter metabolic process	3	490	96	47438	0.0776185	0.204044	3.1036	BnaCnng33690D;BnaC05g06260D;BnaA01g24820D
GO1901657	glycosyl compound metabolic process	12	490	670	47438	0.0777475	0.204176	1.7661	BnaC08g28550D;BnaAnng20200D;BnaC04g22390D;BnaC01g01500D;BnaC07g26280D;BnaC01g01490D;BnaC08g30370D;BnaC02g38400D;BnaA09g55500D;BnaC04g22420D;BnaC01g41470D;BnaA06g30390D
GO0010118	stomatal movement	5	490	219	47438	0.0778998	0.204369	2.25137	BnaA09g09830D;BnaC03g21860D;BnaC09g34350D;BnaCnng44750D;BnaA10g12140D
GO0009150	purine ribonucleotide metabolic process	10	490	536	47438	0.0783992	0.205366	1.83864	BnaC03g58870D;BnaAnng34010D;BnaC08g28550D;BnaCnng37100D;BnaA02g31990D;BnaC02g40580D;BnaA03g11410D;BnaC02g44850D;BnaCnng47950D;BnaA06g38800D
GO0016705	oxidoreductase activity, acting on paired donors, with incorporation or reduction of molecular oxygen	12	490	674	47438	0.0785753	0.205366	1.75527	BnaA09g27040D;BnaC05g31460D;BnaA04g17560D;BnaC07g35800D;BnaAnng31420D;BnaC04g50320D;BnaC01g01500D;BnaA05g33880D;BnaC04g41120D;BnaC01g01490D;BnaC02g35940D;BnaA05g20100D
GO0009744	response to sucrose	6	490	287	47438	0.0787325	0.205366	2.05878	BnaC03g34940D;BnaC04g22390D;BnaA10g15140D;BnaC09g37480D;BnaA03g29700D;BnaCnng72260D
GO0042545	cell wall modification	6	490	287	47438	0.0787325	0.205366	2.05878	BnaAnng23050D;BnaC05g14940D;BnaC03g67980D;BnaA02g22470D;BnaC06g38360D;BnaC01g41470D
GO0006596	polyamine biosynthetic process	2	490	45	47438	0.0788347	0.205366	4.47055	BnaC03g28300D;BnaA03g23800D
GO0018024	histone-lysine N-methyltransferase activity	2	490	45	47438	0.0788347	0.205366	4.47055	BnaC05g31460D;BnaA05g20100D
GO0019321	pentose metabolic process	2	490	45	47438	0.0788347	0.205366	4.47055	BnaAnng10090D;BnaC07g18010D
GO0016818	hydrolase activity, acting on acid anhydrides, in phosphorus-containing anhydrides	14	490	2131	47438	0.0795179	0.205589	0.622843	BnaC03g58870D;BnaA09g09830D;BnaA06g34720D;BnaC08g17880D;BnaA08g28620D;BnaC03g16140D;BnaC09g27270D;BnaCnng44750D;BnaA08g22690D;BnaC02g22250D;BnaA02g16460D;BnaC07g21010D;BnaA06g21560D;BnaC06g43940D
GO0016817	hydrolase activity, acting on acid anhydrides	14	490	2143	47438	0.0795828	0.205589	0.619167	BnaC03g58870D;BnaA09g09830D;BnaA06g34720D;BnaC08g17880D;BnaA08g28620D;BnaC03g16140D;BnaC09g27270D;BnaCnng44750D;BnaA08g22690D;BnaC02g22250D;BnaA02g16460D;BnaC07g21010D;BnaA06g21560D;BnaC06g43940D
GO0004352	glutamate dehydrogenase (NAD+) activity	1	490	8	47438	0.0797133	0.205589	13.7134	BnaAnng13720D
GO0007263	nitric oxide mediated signal transduction	1	490	8	47438	0.0797133	0.205589	13.7134	BnaA10g18740D
GO0010338	leaf formation	1	490	8	47438	0.0797133	0.205589	13.7134	BnaC04g07760D
GO0043446	cellular alkane metabolic process	1	490	8	47438	0.0797133	0.205589	13.7134	BnaCnng09200D
GO0043447	alkane biosynthetic process	1	490	8	47438	0.0797133	0.205589	13.7134	BnaCnng09200D
GO0071465	cellular response to desiccation	1	490	8	47438	0.0797133	0.205589	13.7134	BnaCnng63310D
GO0080013	(E,E)-geranyllinalool synthase activity	1	490	8	47438	0.0797133	0.205589	13.7134	BnaA03g60000D
GO1902609	(R)-2-hydroxy-alpha-linolenic acid biosynthetic process	1	490	8	47438	0.0797133	0.205589	13.7134	BnaA05g33880D
GO0006163	purine nucleotide metabolic process	10	490	542	47438	0.0804138	0.207189	1.81767	BnaC03g58870D;BnaAnng34010D;BnaC08g28550D;BnaCnng37100D;BnaA02g31990D;BnaC02g40580D;BnaA03g11410D;BnaC02g44850D;BnaCnng47950D;BnaA06g38800D
GO0034220	ion transmembrane transport	31	490	2185	47438	0.0815358	0.209872	1.4045	BnaA09g09830D;BnaA08g06260D;BnaAnng04520D;BnaC03g52730D;BnaC06g13300D;BnaCnng56610D;BnaC02g33350D;BnaC08g13040D;BnaA04g21850D;BnaCnng57580D;BnaA09g52260D;BnaC04g51630D;BnaA10g18740D;BnaC07g28040D;BnaA03g11410D;BnaC07g20310D;BnaA07g35920D;BnaCnng44750D;BnaA06g01060D;BnaA07g28390D;BnaA10g16170D;BnaA09g34030D;BnaC08g06690D;BnaA05g14600D;BnaA04g23730D;BnaC02g39630D;BnaC04g18440D;BnaC05g27530D;BnaA07g…
GO0004497	monooxygenase activity	10	490	546	47438	0.0818653	0.210116	1.80395	BnaA04g17560D;BnaC07g35800D;BnaAnng31420D;BnaA05g00940D;BnaC04g50320D;BnaC01g01500D;BnaC04g41120D;BnaC01g01490D;BnaC01g23810D;BnaC02g35940D
GO0019852	L-ascorbic acid metabolic process	2	490	46	47438	0.0818741	0.210116	4.36885	BnaA06g13760D;BnaC05g15180D
GO0030026	cellular manganese ion homeostasis	2	490	46	47438	0.0818741	0.210116	4.36885	BnaA04g21850D;BnaC04g45720D
GO0048519	negative regulation of biological process	61	490	4780	47438	0.0826094	0.211794	1.27243	BnaA06g38950D;BnaC02g09390D;BnaA09g40670D;BnaC01g01940D;BnaC04g07710D;BnaC05g41830D;BnaCnng27210D;BnaC05g38410D;BnaC04g07760D;BnaC07g36050D;BnaAnng23990D;BnaAnng23920D;BnaC09g34350D;BnaA10g11080D;BnaAnng20740D;BnaA07g33240D;BnaA08g28620D;BnaA03g24900D;BnaC03g72930D;BnaC06g38200D;BnaA05g27660D;BnaA07g30430D;BnaC08g49040D;BnaA10g14100D;BnaCnng62150D;BnaC01g18020D;BnaA08g18790D;BnaC09g53650D;BnaC02g…
GO0005543	phospholipid binding	8	490	418	47438	0.0832101	0.213123	1.88394	BnaC02g45160D;BnaC07g48820D;BnaC05g15780D;BnaA07g11450D;BnaC09g08130D;BnaC07g15380D;BnaA09g07980D;BnaCnng27850D
GO0000288	nuclear-transcribed mRNA catabolic process, deadenylation-dependent decay	4	490	159	47438	0.083422	0.213448	2.48469	BnaA06g38950D;BnaC02g09390D;BnaA10g14100D;BnaA02g05510D
GO0022607	cellular component assembly	20	490	2816	47438	0.0835017	0.213448	0.671963	BnaAnng34010D;BnaA08g28620D;BnaC03g16140D;BnaC04g25500D;BnaA02g31990D;BnaA09g05190D;BnaA06g09900D;BnaC02g40580D;BnaC08g26260D;BnaA04g03610D;BnaC09g27270D;BnaAnng14080D;BnaC06g38360D;BnaA09g53100D;BnaC02g10080D;BnaCnng63660D;BnaA06g21560D;BnaA05g21090D;BnaC05g33960D;BnaA02g13370D
GO1902584	positive regulation of response to water deprivation	2	490	47	47438	0.084949	0.216934	4.27168	BnaC03g16140D;BnaC09g27270D
GO0055069	zinc ion homeostasis	3	490	100	47438	0.0853038	0.217625	2.97536	BnaA04g21850D;BnaC04g51630D;BnaC04g45720D
GO0044270	cellular nitrogen compound catabolic process	12	490	700	47438	0.0856908	0.218343	1.68799	BnaA06g38950D;BnaA09g27040D;BnaC02g09390D;BnaAnng20200D;BnaCnng37100D;BnaA10g14100D;BnaC02g44850D;BnaA02g05510D;BnaC01g34640D;BnaA01g27800D;BnaA04g07260D;BnaA06g38800D
GO0006875	cellular metal ion homeostasis	8	490	422	47438	0.0857536	0.218343	1.86558	BnaA03g00260D;BnaA05g29010D;BnaC03g00160D;BnaC05g43490D;BnaA04g21850D;BnaC04g51630D;BnaAnng11680D;BnaC04g45720D
GO0042752	regulation of circadian rhythm	4	490	161	47438	0.0863924	0.219754	2.45294	BnaC05g31460D;BnaCnng37560D;BnaA07g21130D;BnaA05g20100D
GO0006637	acyl-CoA metabolic process	3	490	101	47438	0.087274	0.220143	2.94494	BnaC03g58870D;BnaCnng47950D;BnaA06g38800D
GO0015112	nitrate transmembrane transporter activity	3	490	101	47438	0.087274	0.220143	2.94494	BnaC06g13300D;BnaA07g28390D;BnaA07g15180D
GO0018958	phenol-containing compound metabolic process	3	490	101	47438	0.087274	0.220143	2.94494	BnaC03g24530D;BnaC02g13840D;BnaA02g09890D
GO0035383	thioester metabolic process	3	490	101	47438	0.087274	0.220143	2.94494	BnaC03g58870D;BnaCnng47950D;BnaA06g38800D
GO0009060	aerobic respiration	5	490	227	47438	0.0875475	0.220143	2.16987	BnaAnng34010D;BnaA02g31990D;BnaC03g04830D;BnaC02g40580D;BnaA03g03400D
GO0009700	indole phytoalexin biosynthetic process	2	490	48	47438	0.0880584	0.220143	4.17872	BnaA06g18440D;BnaC01g41470D
GO0009970	cellular response to sulfate starvation	2	490	48	47438	0.0880584	0.220143	4.17872	BnaC07g15270D;BnaA09g53100D
GO0046217	indole phytoalexin metabolic process	2	490	48	47438	0.0880584	0.220143	4.17872	BnaA06g18440D;BnaC01g41470D
GO0055070	copper ion homeostasis	2	490	48	47438	0.0880584	0.220143	4.17872	BnaA05g29010D;BnaC05g43490D
GO0048827	phyllome development	25	490	1725	47438	0.0882746	0.220143	1.43099	BnaC08g21320D;BnaA03g00260D;BnaC03g00160D;BnaC04g07760D;BnaC09g34350D;BnaA03g26220D;BnaC05g14940D;BnaC03g73200D;BnaC03g04830D;BnaC05g11630D;BnaC02g15270D;BnaA06g10010D;BnaAnng26200D;BnaC01g26220D;BnaA03g03400D;BnaA06g18440D;BnaCnng37560D;BnaC04g53030D;BnaC06g34480D;BnaA10g12140D;BnaC01g23810D;BnaC02g39630D;BnaA05g03420D;BnaA02g10970D;BnaC03g45280D
GO0006955	immune response	17	490	1067	47438	0.0885609	0.220143	1.57106	BnaC03g59270D;BnaC05g38410D;BnaC08g13910D;BnaA06g24600D;BnaA10g18740D;BnaC03g52390D;BnaA05g33880D;BnaC03g39000D;BnaC04g53030D;BnaA09g47670D;BnaCnng30450D;BnaA05g03420D;BnaA06g36140D;BnaC07g18960D;BnaC03g45280D;BnaC01g41470D;BnaC04g43980D
GO0001504	neurotransmitter uptake	1	490	9	47438	0.0892208	0.220143	11.999	BnaC04g18440D
GO0001516	prostaglandin biosynthetic process	1	490	9	47438	0.0892208	0.220143	11.999	BnaA05g33880D
GO0004123	cystathionine gamma-lyase activity	1	490	9	47438	0.0892208	0.220143	11.999	BnaA09g53100D
GO0004385	guanylate kinase activity	1	490	9	47438	0.0892208	0.220143	11.999	BnaC08g28550D
GO0004612	phosphoenolpyruvate carboxykinase (ATP) activity	1	490	9	47438	0.0892208	0.220143	11.999	BnaA06g24600D
GO0004793	threonine aldolase activity	1	490	9	47438	0.0892208	0.220143	11.999	BnaC05g06260D
GO0006659	phosphatidylserine biosynthetic process	1	490	9	47438	0.0892208	0.220143	11.999	BnaC01g00680D
GO0008732	L-allo-threonine aldolase activity	1	490	9	47438	0.0892208	0.220143	11.999	BnaC05g06260D
GO0009151	purine deoxyribonucleotide metabolic process	1	490	9	47438	0.0892208	0.220143	11.999	BnaC08g28550D
GO0009413	response to flooding	1	490	9	47438	0.0892208	0.220143	11.999	BnaAnng26200D
GO0010296	prenylcysteine methylesterase activity	1	490	9	47438	0.0892208	0.220143	11.999	BnaCnng29630D
GO0019343	cysteine biosynthetic process via cystathionine	1	490	9	47438	0.0892208	0.220143	11.999	BnaA09g53100D
GO0019346	transsulfuration	1	490	9	47438	0.0892208	0.220143	11.999	BnaA09g53100D
GO0046457	prostanoid biosynthetic process	1	490	9	47438	0.0892208	0.220143	11.999	BnaA05g33880D
GO0046710	GDP metabolic process	1	490	9	47438	0.0892208	0.220143	11.999	BnaC08g28550D
GO0051938	L-glutamate import	1	490	9	47438	0.0892208	0.220143	11.999	BnaC04g18440D
GO0071266	'de novo' L-methionine biosynthetic process	1	490	9	47438	0.0892208	0.220143	11.999	BnaA09g53100D
GO0089718	amino acid import across plasma membrane	1	490	9	47438	0.0892208	0.220143	11.999	BnaC04g18440D
GO0098712	L-glutamate import across plasma membrane	1	490	9	47438	0.0892208	0.220143	11.999	BnaC04g18440D
GO0005778	peroxisomal membrane	3	490	102	47438	0.0892633	0.220143	2.91513	BnaA07g18900D;BnaC07g28040D;BnaCnng13410D
GO0031903	microbody membrane	3	490	102	47438	0.0892633	0.220143	2.91513	BnaA07g18900D;BnaC07g28040D;BnaCnng13410D
GO0009205	purine ribonucleoside triphosphate metabolic process	7	490	331	47438	0.0893796	0.220221	2.08553	BnaAnng34010D;BnaC08g28550D;BnaCnng37100D;BnaA02g31990D;BnaC02g40580D;BnaA03g11410D;BnaC02g44850D
GO0042542	response to hydrogen peroxide	7	490	334	47438	0.0906509	0.223141	2.06626	BnaA03g00260D;BnaC03g00160D;BnaC07g15270D;BnaA03g26220D;BnaC03g73200D;BnaAnng01320D;BnaC02g42410D
GO0051646	mitochondrion localization	2	490	49	47438	0.0912012	0.22403	4.08973	BnaA06g36140D;BnaC07g18960D
GO0098609	cell-cell adhesion	2	490	49	47438	0.0912012	0.22403	4.08973	BnaCnng33690D;BnaA01g24820D
GO0009694	jasmonic acid metabolic process	3	490	103	47438	0.0912715	0.22403	2.88591	BnaA05g10480D;BnaA03g15290D;BnaC04g11470D
GO0042803	protein homodimerization activity	14	490	873	47438	0.0915207	0.224429	1.57807	BnaA08g06260D;BnaAnng04520D;BnaAnng20200D;BnaC04g07710D;BnaC04g07760D;BnaC03g16140D;BnaC02g48590D;BnaC09g27270D;BnaC09g44680D;BnaC08g06690D;BnaC02g10080D;BnaC05g27530D;BnaCnng72260D;BnaC04g43980D
GO0043200	response to amino acid	4	490	165	47438	0.0924852	0.22658	2.39179	BnaC02g45160D;BnaC09g08130D;BnaA09g07980D;BnaCnng27850D
GO0052386	cell wall thickening	3	490	104	47438	0.0932985	0.228357	2.85728	BnaC05g14940D;BnaC06g38360D;BnaC01g41470D
GO0009144	purine nucleoside triphosphate metabolic process	7	490	340	47438	0.0934439	0.228497	2.02877	BnaAnng34010D;BnaC08g28550D;BnaCnng37100D;BnaA02g31990D;BnaC02g40580D;BnaA03g11410D;BnaC02g44850D
GO0031399	regulation of protein modification process	4	490	907	47438	0.0935634	0.228573	0.41968	BnaA10g11080D;BnaC02g48590D;BnaC09g53650D;BnaC01g25430D
GO0055076	transition metal ion homeostasis	8	490	434	47438	0.0939884	0.229396	1.81256	BnaA03g00260D;BnaA05g29010D;BnaC03g00160D;BnaC05g43490D;BnaA04g21850D;BnaC04g51630D;BnaAnng11680D;BnaC04g45720D
GO0045934	negative regulation of nucleobase-containing compound metabolic process	20	490	1316	47438	0.0942836	0.229899	1.49895	BnaC04g07710D;BnaCnng27210D;BnaC05g38410D;BnaC04g07760D;BnaAnng23990D;BnaA08g18790D;BnaA06g13250D;BnaA01g26030D;BnaC03g58080D;BnaC05g14810D;BnaC03g39000D;BnaA08g17540D;BnaC08g37780D;BnaA08g23150D;BnaC08g36840D;BnaC02g26030D;BnaA09g44300D;BnaA02g15990D;BnaC06g19560D;BnaC05g21480D
GO0031669	cellular response to nutrient levels	12	490	724	47438	0.0948638	0.231097	1.63025	BnaC07g15270D;BnaA06g24600D;BnaA07g38000D;BnaC03g34940D;BnaA06g33900D;BnaA09g53100D;BnaC01g34640D;BnaA06g15780D;BnaA05g30920D;BnaA03g29700D;BnaCnng72260D;BnaA01g27800D
GO0003993	acid phosphatase activity	3	490	105	47438	0.0953439	0.232048	2.82921	BnaC07g21340D;BnaA06g34450D;BnaA09g33210D
GO0005975	carbohydrate metabolic process	23	490	1571	47438	0.0970453	0.234972	1.44443	BnaA10g18700D;BnaC08g21320D;BnaAnng10090D;BnaCnng37100D;BnaA06g13760D;BnaA06g24600D;BnaC05g14940D;BnaCnng33690D;BnaCnng07500D;BnaC08g08130D;BnaA03g50170D;BnaC01g00680D;BnaCnng63310D;BnaC02g44850D;BnaC07g12870D;BnaC07g18010D;BnaC01g26220D;BnaA07g17230D;BnaCnng30450D;BnaC07g42640D;BnaC05g15180D;BnaA01g24820D;BnaC09g42430D
GO0019220	regulation of phosphate metabolic process	3	490	736	47438	0.0974452	0.234972	0.388393	BnaA10g11080D;BnaC09g53650D;BnaC01g25430D
GO0051174	regulation of phosphorus metabolic process	3	490	736	47438	0.0974452	0.234972	0.388393	BnaA10g11080D;BnaC09g53650D;BnaC01g25430D
GO0009608	response to symbiont	2	490	51	47438	0.0975833	0.234972	3.92263	BnaC02g15270D;BnaA02g10970D
GO0044703	multi-organism reproductive process	3	490	744	47438	0.0977625	0.234972	0.384133	BnaCnng33690D;BnaC03g12400D;BnaA01g24820D
GO0047484	regulation of response to osmotic stress	5	490	235	47438	0.0977879	0.234972	2.09404	BnaC04g07710D;BnaC03g16140D;BnaC09g27270D;BnaCnng09850D;BnaAnng05950D
GO0048581	negative regulation of post-embryonic development	1	490	442	47438	0.0979798	0.234972	0.215661	BnaA07g33240D
GO0099081	supramolecular polymer	1	490	443	47438	0.0979933	0.234972	0.215168	BnaA06g21560D
GO0099512	supramolecular fiber	1	490	443	47438	0.0979933	0.234972	0.215168	BnaA06g21560D
GO0009126	purine nucleoside monophosphate metabolic process	7	490	349	47438	0.098247	0.234972	1.975	BnaAnng34010D;BnaC08g28550D;BnaCnng37100D;BnaA02g31990D;BnaC02g40580D;BnaA03g11410D;BnaC02g44850D
GO0009167	purine ribonucleoside monophosphate metabolic process	7	490	349	47438	0.098247	0.234972	1.975	BnaAnng34010D;BnaC08g28550D;BnaCnng37100D;BnaA02g31990D;BnaC02g40580D;BnaA03g11410D;BnaC02g44850D
GO0004198	calcium-dependent cysteine-type endopeptidase activity	1	490	10	47438	0.0986303	0.234972	10.6655	BnaA01g31850D
GO0006021	inositol biosynthetic process	1	490	10	47438	0.0986303	0.234972	10.6655	BnaC01g00680D
GO0006658	phosphatidylserine metabolic process	1	490	10	47438	0.0986303	0.234972	10.6655	BnaC01g00680D
GO0010285	L,L-diaminopimelate aminotransferase activity	1	490	10	47438	0.0986303	0.234972	10.6655	BnaC03g45280D
GO0015180	L-alanine transmembrane transporter activity	1	490	10	47438	0.0986303	0.234972	10.6655	BnaC04g18440D
GO0015808	L-alanine transport	1	490	10	47438	0.0986303	0.234972	10.6655	BnaC04g18440D
GO0019172	glyoxalase III activity	1	490	10	47438	0.0986303	0.234972	10.6655	BnaC04g28590D
GO0019249	lactate biosynthetic process	1	490	10	47438	0.0986303	0.234972	10.6655	BnaC04g28590D
GO0022858	alanine transmembrane transporter activity	1	490	10	47438	0.0986303	0.234972	10.6655	BnaC04g18440D
GO0032328	alanine transport	1	490	10	47438	0.0986303	0.234972	10.6655	BnaC04g18440D
GO0045140	inositol phosphoceramide synthase activity	1	490	10	47438	0.0986303	0.234972	10.6655	BnaA04g04400D
GO0046456	icosanoid biosynthetic process	1	490	10	47438	0.0986303	0.234972	10.6655	BnaA05g33880D
GO0009926	auxin polar transport	4	490	169	47438	0.0987764	0.235104	2.33361	BnaA01g06180D;BnaC03g67810D;BnaC01g07450D;BnaA08g12770D
GO0043269	regulation of ion transport	5	490	236	47438	0.0991088	0.235299	2.08493	BnaC05g41830D;BnaAnng23920D;BnaC07g50310D;BnaA05g27660D;BnaA01g37370D
GO0001134	obsolete transcription regulator recruiting activity	1	490	458	47438	0.0991305	0.235299	0.208039	BnaC04g07760D
GO0001135	obsolete RNA polymerase II transcription regulator recruiting activity	1	490	458	47438	0.0991305	0.235299	0.208039	BnaC04g07760D
GO0099080	supramolecular complex	1	490	459	47438	0.0992678	0.235409	0.20758	BnaA06g21560D
GO0048507	meristem development	3	490	762	47438	0.0995761	0.235924	0.374877	BnaA09g27040D;BnaA05g05010D;BnaCnng37560D
GO0009199	ribonucleoside triphosphate metabolic process	7	490	352	47438	0.100008	0.236732	1.9577	BnaAnng34010D;BnaC08g28550D;BnaCnng37100D;BnaA02g31990D;BnaC02g40580D;BnaA03g11410D;BnaC02g44850D
[truncated: 1,497 more rows]

## Sheet: S5
annotid	AnnotDesc	Interesting_genes_with_this_annotid	Interesting_genes_with_any_annotation	BG_with_annotid	BG_with_any_annotation	pvalue	p_adj_BH	OR	Interesting_gene_ids
[truncated: 2,420 more rows]

[truncated: 3 more sheets: S6, S7, S8]
